# Supplementary material for: Identification and Evaluation of Novel Antigen Candidates against Salmonella Pullorum Infection Using Reverse Vaccinology
Source: Vaccines (Basel). 2023 Apr 18;11(4):865. doi: 10.3390/vaccines11040865 (PMC10143441; doi:10.3390/vaccines11040865)
Supplement: Supplementary file 1 [file vaccines-11-00865-s001.zip › Supplement Tables.xlsx]

## Sheet: Supp.Table1_Primers
Gene target	primer sequence
invA -F	tgatttacttaaagaagtgctca
invA-R	ttatattgtttttataacattcactg
ratA -F	gacgtcgctgccgtcgtacc
ratA -R	tacagcgaacatgcgggcgg
PET30a-F	ggatccgatatcagccatggccttgtcgtcgtcgtcggtacc
PET30a-R	aagcttgcggccgcactcgagcaccaccacc
acrA-F	tgcggccgcaagcttttaagacctgggctg
acrA-R	gccatggctgatatcggatccatgaacaaaaacagagggt
dcrB-F	cgagtgcggccgcaagcttttacttaataaccaacgtatt
dcrB-R	ccatggctgatatcggatccatgcgcaatttggttaaata
lpfA-F	tcgagtgcggccgcaagcttttattcgtaggacaggttga
lpfA-R	ccatggctgatatcggatccatgaaaaaggttgtttttgc
msrP-F	gagtgcggccgcaagcttttaaaaattctcccgcaaattg
msrP-R	gccatggctgatatcggatccatgaaaaagatacgtccat
ompC-F	gagtgcggccgcaagctttcaaaactcgtagactaagccg
ompC-R	gccatggctgatatcggatccatgaaaaaagtagtggtgt
pagN-F	tcgagtgcggccgcaagcttttaaaaggcgtaagtaatgc
pagN-R	ggctgatatcggatccatgaaaaactttttcgcagtctgc
qseG-F	agtgcggccgcaagctttcatggcgttacctcatc
qseG-R	ccatggctgatatcggatccgtgggcatatcgtgtctggc
sinH-F	cgagtgcggccgcaagcttctatttctgactatacgtaac
sinH-R	atggctgatatcggatccatggtgcgaaggattcgcattc
stfF-F	gagtgcggccgcaagctttcactggtaatccacgactaac
stfF-R	gccatggctgatatcggatccatgttgactcgctggaaaa
sthB-F	gagtgcggccgcaagctttcactggcattgctcgtgtaag
sthB-R	gccatggctgatatcggatccgtgcaattctccagagtag
stiH-F	tcgagtgcggccgcaagctttcagcgaatctgaatctcca
stiH-R	atggctgatatcggatccatgaagaatttatggatgctgc
lpfB-F	tgcggccgcaagcttttagttaacgcgctg
lpfB-R	ccatggctgatatcggatccatgaaccgctcacgtttgat
peg.1210-F	gcggccgcaagcttttagccctgatgcg
peg.1210-R	ggctgatatcggatccatgaaactttttctgacaacagc
yhcN-F	gtgcggccgcaagcttttatttgtacagttcggca
yhcN-R	ggccatggctgatatcggatccatgaaaatcaaaaccact
fdhF-F	gccgcaagctttcagacgcgagcgc
fdhF-R	catggctgatatcggatccatgaaaaaagtcgtcacggtt
peg.2134-F	cgagtgcggccgcaagctttcaaaagtggtattgtaatcc
peg.2134-R	gccatggctgatatcggatccatgaaaatcaacaaatatc
chiP-F	agtgcggccgcaagctttcagaaaatagtgaatggc
chiP-R	gccatggctgatatcggatccatgcgtacgtttagtggca
peg.695-F	gtgcggccgcaagcttttaccaccagatttccat
peg.695-R	ggccatggctgatatcggatccatgatgattactctgcgc
pstS-F	gtgcggccgcaagcttttaatacagcgccttacc
pstS-R	gccatggctgatatcggatccatgaaagttatgcgtacca
nlpD-F	tgcggccgcaagcttttatcgctgcggtaa
nlpD-R	catggctgatatcggatccatgagcgcgggaagcccaa
sodC-F	tgcggccgcaagcttttatttaatgacgccgcag
sodC-R	catggctgatatcggatccatgaagcgattaagtttagcg
hslJ-F	gtgcggccgcaagcttttagtgcgctaaat
hslJ-R	gccatggctgatatcggatccatgaagaaaagcgtcacgc

## Sheet: Supp. Table2_182 strains
Strain name	Serovar	Biovar	ST	Province	Year	Sample source	Data source
SAL03395	Gallinarum	Pullorum	92	Guangxi	2011	Chicken	Lab
SAL03394	Gallinarum	Pullorum	92	Guangxi	1995	Chicken	Lab
SAL03405	Gallinarum	Pullorum	92	Guangxi	2018	Chicken	Lab
SAL00715	Gallinarum	Pullorum	2151	Jiangsu	2014	Chicken	Lab
SAL02666	Gallinarum	Pullorum	3717	Shanghai	2011	Other avian	Lab
SAL00726	Gallinarum	Pullorum	3717	Jiangsu	2015	Chicken	Lab
SAL00722	Gallinarum	Pullorum	3717	Jiangsu	2015	Chicken	Lab
SAL02672	Gallinarum	Pullorum	2151	Shanghai	2011	Chicken	Lab
SAL02673	Gallinarum	Pullorum	2151	Shanghai	2011	Chicken	Lab
SAL02668	Gallinarum	Pullorum	2151	Shanghai	2011	Chicken	Lab
SAL02670	Gallinarum	Pullorum	2151	Shanghai	2011	Chicken	Lab
SAL02669	Gallinarum	Pullorum	2151	Shanghai	2011	Chicken	Lab
SAL02667	Gallinarum	Pullorum	2151	Shanghai	2011	Chicken	Lab
SAL02671	Gallinarum	Pullorum	2151	Shanghai	2011	Chicken	Lab
SAL03402	Gallinarum	Pullorum	2151	Gansu	2014	Chicken	Lab
SAL03286	Gallinarum	Pullorum	2151	Henan	2015	Chicken	Lab
SAL03437	Gallinarum	Pullorum	2151	Anhui	2012	Chicken egg	Lab
SAL03436	Gallinarum	Pullorum	2151	Anhui	2012	Chicken egg	Lab
SAL03439	Gallinarum	Pullorum	2151	Anhui	2012	Chicken egg	Lab
SAL03291	Gallinarum	Pullorum	2151	Henan	2015	Chicken egg	Lab
SAL03303	Gallinarum	Pullorum	2151	Henan	2015	Chicken	Lab
SAL03290	Gallinarum	Pullorum	2151	Henan	2015	Chicken	Lab
SAL03307	Gallinarum	Pullorum	2151	Henan	2015	Chicken	Lab
SAL02647	Gallinarum	Pullorum	2151	Hubei	2017	Chicken	Lab
SAL02649	Gallinarum	Pullorum	2151	Guangxi	2018	Chicken egg	Lab
SAL02648	Gallinarum	Pullorum	2151	Guangxi	2018	Chicken	Lab
SAL02650	Gallinarum	Pullorum	2151	Guangxi	2018	Chicken egg	Lab
SAL03308	Gallinarum	Pullorum	2151	Henan	2015	Chicken	Lab
SAL03306	Gallinarum	Pullorum	2151	Henan	2015	Chicken	Lab
SAL03447	Gallinarum	Pullorum	92	Hubei	2013	Chicken	Lab
SAL03388	Gallinarum	Pullorum	92	Jiangsu	2011	Chicken	Lab
SAL03386	Gallinarum	Pullorum	92	Jiangsu	2008	Chicken	Lab
SAL03392	Gallinarum	Pullorum	92	Guangxi	2013	Chicken	Lab
SAL00740	Gallinarum	Pullorum	92	Jiangsu	2017	Chicken egg	Lab
SAL03320	Gallinarum	Pullorum	92	Henan	2014	Chicken egg	Lab
SAL03319	Gallinarum	Pullorum	92	Henan	2014	Chicken	Lab
SAL03337	Gallinarum	Pullorum	New1	Henan	2015	Chicken	Lab
SAL03335	Gallinarum	Pullorum	92	Henan	2015	Chicken	Lab
SAL03305	Gallinarum	Pullorum	92	Henan	2015	Chicken	Lab
SAL03318	Gallinarum	Pullorum	92	Henan	2014	Chicken	Lab
SAL03317	Gallinarum	Pullorum	92	Henan	2014	Chicken	Lab
SAL03313	Gallinarum	Pullorum	92	Henan	2014	Chicken	Lab
SAL03443	Gallinarum	Pullorum	92	Henan	2013	Chicken	Lab
SAL00724	Gallinarum	Pullorum	92	Jiangsu	2015	Chicken	Lab
SAL03442	Gallinarum	Pullorum	92	Henan	2013	Chicken	Lab
SAL00705	Gallinarum	Pullorum	92	Jiangsu	2014	Chicken	Lab
SAL03444	Gallinarum	Pullorum	92	Hubei	2013	Chicken	Lab
SAL03445	Gallinarum	Pullorum	92	Hubei	2013	Chicken	Lab
SAL03390	Gallinarum	Pullorum	92	Jiangsu	2012	Chicken	Lab
SAL03396	Gallinarum	Pullorum	92	Gansu	2014	Chicken	Lab
SAL03446	Gallinarum	Pullorum	92	Hubei	2013	Chicken	Lab
SAL03391	Gallinarum	Pullorum	92	Beijing	2013	Chicken egg	Lab
SAL00700	Gallinarum	Pullorum	92	Jiangsu	2013	Chicken egg	Lab
SAL03287	Gallinarum	Pullorum	92	Henan	2015	Chicken	Lab
SAL03285	Gallinarum	Pullorum	92	Henan	2015	Chicken	Lab
SAL03324	Gallinarum	Pullorum	92	Henan	2014	Chicken egg	Lab
SAL03322	Gallinarum	Pullorum	92	Henan	2014	Chicken egg	Lab
SAL03321	Gallinarum	Pullorum	92	Henan	2014	Chicken egg	Lab
SAL03323	Gallinarum	Pullorum	92	Henan	2014	Chicken	Lab
SAL03333	Gallinarum	Pullorum	92	Henan	2014	Chicken	Lab
SAL03332	Gallinarum	Pullorum	92	Henan	2014	Chicken	Lab
SAL03331	Gallinarum	Pullorum	92	Henan	2014	Chicken	Lab
SAL03311	Gallinarum	Pullorum	92	Henan	2015	Chicken	Lab
SAL03310	Gallinarum	Pullorum	92	Henan	2015	Chicken	Lab
SAL03441	Gallinarum	Pullorum	92	Henan	2013	Chicken	Lab
SAL02680	Gallinarum	Pullorum	92	Guangdong	2013	Chicken	Lab
SAL02679	Gallinarum	Pullorum	92	Guangdong	2013	Chicken egg	Lab
SAL03404	Gallinarum	Pullorum	92	Heilongjiang	2012	Chicken	Lab
SAL03316	Gallinarum	Pullorum	92	Henan	2014	Chicken	Lab
SAL03312	Gallinarum	Pullorum	92	Henan	2014	Chicken	Lab
SAL03289	Gallinarum	Pullorum	92	Henan	2015	Chicken	Lab
SAL03334	Gallinarum	Pullorum	92	Henan	2015	Chicken egg	Lab
SAL03385	Gallinarum	Pullorum	92	Jiangsu	1978	Chicken	Lab
SAL03448	Gallinarum	Pullorum	92	Henan	2013	Chicken	Lab
SAL03449	Gallinarum	Pullorum	92	Henan	2013	Chicken	Lab
SAL03453	Gallinarum	Pullorum	92	Hubei	2016	Chicken	Lab
SAL03325	Gallinarum	Pullorum	92	Henan	2015	Chicken	Lab
SAL03413	Gallinarum	Pullorum	92	Guangxi	2018	Chicken	Lab
SAL02677	Gallinarum	Pullorum	92	Guangdong	2013	Chicken	Lab
SAL02675	Gallinarum	Pullorum	92	Guangdong	2013	Chicken	Lab
SAL02681	Gallinarum	Pullorum	92	Guangdong	2013	Chicken	Lab
SAL02676	Gallinarum	Pullorum	92	Guangdong	2013	Chicken	Lab
SAL00708	Gallinarum	Pullorum	92	Jiangsu	2014	Chicken	Lab
SAL03438	Gallinarum	Pullorum	92	Hubei	2012	Chicken egg	Lab
SAL03327	Gallinarum	Pullorum	92	Henan	2015	Chicken	Lab
SAL03329	Gallinarum	Pullorum	92	Henan	2015	Chicken	Lab
SAL03326	Gallinarum	Pullorum	92	Henan	2015	Chicken	Lab
SAL03328	Gallinarum	Pullorum	92	Henan	2015	Chicken	Lab
SAL03330	Gallinarum	Pullorum	92	Henan	2015	Chicken	Lab
SAL02659	Gallinarum	Pullorum	92	Shandong	2018	Chicken	Lab
SAL02660	Gallinarum	Pullorum	92	Shandong	2018	Chicken egg	Lab
SAL02661	Gallinarum	Pullorum	92	Shandong	2018	Chicken	Lab
SAL02658	Gallinarum	Pullorum	92	Shandong	2018	Chicken egg	Lab
SAL03429	Gallinarum	Pullorum	92	Jiangsu	2012	Chicken	Lab
SAL03432	Gallinarum	Pullorum	92	Jiangsu	2014	Chicken	Lab
SAL03427	Gallinarum	Pullorum	92	Anhui	2011	Chicken	Lab
SAL03434	Gallinarum	Pullorum	92	Shandong	2009	Chicken	Lab
SAL03451	Gallinarum	Pullorum	92	Hubei	2013	Chicken	Lab
SAL03430	Gallinarum	Pullorum	92	Jiangsu	2012	Chicken	Lab
SAL03452	Gallinarum	Pullorum	92	Hubei	2013	Chicken	Lab
SAL03450	Gallinarum	Pullorum	92	Hubei	2013	Chicken	Lab
SAL03435	Gallinarum	Pullorum	92	Shandong	2009	Chicken	Lab
SAL03309	Gallinarum	Pullorum	92	Henan	2015	Chicken	Lab
SAL03414	Gallinarum	Pullorum	92	Guangxi	2018	Chicken	Lab
SAL02674	Gallinarum	Pullorum	92	Guangdong	2013	Chicken	Lab
SAL02662	Gallinarum	Pullorum	92	Shandong	2018	Chicken	Lab
SAL02664	Gallinarum	Pullorum	92	Shandong	2018	Chicken	Lab
SAL02665	Gallinarum	Pullorum	92	Shandong	2018	Chicken	Lab
SAL02653	Gallinarum	Pullorum	92	Shandong	2018	Chicken	Lab
SAL02657	Gallinarum	Pullorum	92	Shandong	2018	Chicken	Lab
SAL02663	Gallinarum	Pullorum	92	Shandong	2018	Chicken	Lab
SAL02652	Gallinarum	Pullorum	92	Shandong	2018	Chicken	Lab
SAL02654	Gallinarum	Pullorum	92	Shandong	2018	Chicken	Lab
SAL02656	Gallinarum	Pullorum	92	Shandong	2018	Chicken	Lab
SAL02651	Gallinarum	Pullorum	92	Shandong	2018	Chicken	Lab
SAL02678	Gallinarum	Pullorum	92	Guangdong	2013	Chicken	Lab
SAL03403	Gallinarum	Pullorum	92	Gansu	2014	Chicken	Lab
SAL03401	Gallinarum	Pullorum	92	Gansu	2014	Chicken	Lab
SAL03397	Gallinarum	Pullorum	92	Gansu	2014	Chicken	Lab
SAL03426	Gallinarum	Pullorum	92	Jiangsu	2011	Chicken	Lab
SAL03425	Gallinarum	Pullorum	92	Jiangsu	2011	Chicken egg	Lab
SAL03431	Gallinarum	Pullorum	92	Anhui	2012	Chicken egg	Lab
SAL03433	Gallinarum	Pullorum	92	Jiangsu	2014	Chicken egg	Lab
SAL03428	Gallinarum	Pullorum	92	Jiangsu	2012	Chicken egg	Lab
SAL03407	Gallinarum	Pullorum	92	Guangxi	2018	Chicken egg	Lab
SAL03411	Gallinarum	Pullorum	92	Guangxi	2018	Chicken egg	Lab
SAL03406	Gallinarum	Pullorum	92	Guangxi	2018	Chicken egg	Lab
SAL03409	Gallinarum	Pullorum	92	Guangxi	2018	Chicken	Lab
SAL03417	Gallinarum	Pullorum	92	Guangxi	2018	Chicken egg	Lab
SAL03418	Gallinarum	Pullorum	92	Guangxi	2018	Chicken egg	Lab
SAL03416	Gallinarum	Pullorum	92	Guangxi	2018	Chicken egg	Lab
SAL03421	Gallinarum	Pullorum	92	Guangxi	2018	Chicken	Lab
SAL03408	Gallinarum	Pullorum	92	Guangxi	2018	Chicken egg	Lab
SAL03415	Gallinarum	Pullorum	92	Guangxi	2018	Chicken egg	Lab
SAL03420	Gallinarum	Pullorum	92	Guangxi	2018	Chicken egg	Lab
SAL03419	Gallinarum	Pullorum	92	Guangxi	2018	Chicken egg	Lab
SAL03297	Gallinarum	Pullorum	92	Henan	2015	Chicken egg	Lab
SAL00725	Gallinarum	Pullorum	92	Jiangsu	2015	Chicken egg	Lab
SAL03302	Gallinarum	Pullorum	92	Henan	2015	Chicken egg	Lab
SAL03301	Gallinarum	Pullorum	92	Henan	2015	Chicken	Lab
SAL00744	Gallinarum	Pullorum	92	Anhui	2017	Chicken egg	Lab
SAL03298	Gallinarum	Pullorum	92	Henan	2015	Chicken	Lab
SAL03295	Gallinarum	Pullorum	92	Henan	2015	Chicken	Lab
SAL03293	Gallinarum	Pullorum	92	Henan	2015	Chicken	Lab
SAL03296	Gallinarum	Pullorum	92	Henan	2015	Chicken	Lab
SAL03292	Gallinarum	Pullorum	92	Henan	2015	Chicken	Lab
SAL03304	Gallinarum	Pullorum	92	Henan	2015	Chicken egg	Lab
SAL03440	Gallinarum	Pullorum	92	Anhui	2012	Chicken egg	Lab
SAL03294	Gallinarum	Pullorum	92	Henan	2015	Chicken egg	Lab
SAL03300	Gallinarum	Pullorum	92	Henan	2015	Chicken	Lab
SAL03288	Gallinarum	Pullorum	92	Henan	2015	Chicken	Lab
SAL03282	Gallinarum	Pullorum	92	Henan	2015	Chicken	Lab
SAL03315	Gallinarum	Pullorum	92	Henan	2014	Chicken	Lab
SAL03314	Gallinarum	Pullorum	92	Henan	2014	Chicken	Lab
SAL00701	Gallinarum	Pullorum	NA	NA	NA	NA	Lab
SAL00702	Gallinarum	Pullorum	NA	NA	NA	NA	Lab
SAL00703	Gallinarum	Pullorum	NA	NA	NA	NA	Lab
SAL00704	Gallinarum	Pullorum	NA	NA	NA	NA	Lab
SAL00706	Gallinarum	Pullorum	NA	Shandong	2014	chicken	Lab
SAL00719	Gallinarum	Pullorum	NA	Jiangsu	2015	chicken	Lab
SAL00720	Gallinarum	Pullorum	NA	Jiangsu	2015	chicken	Lab
SAL00721	Gallinarum	Pullorum	NA	Jiangsu	2015	chicken	Lab
SAL00723	Gallinarum	Pullorum	NA	Jiangsu	2015	chicken	Lab
SAL00727	Gallinarum	Pullorum	NA	Jiangsu	2015	chicken	Lab
SAL02655	Gallinarum	Pullorum	NA	Shandong	2018	chicken	Lab
SAL03278	Gallinarum	Pullorum	NA	Henan	2015	NA	Lab
SAL03279	Gallinarum	Pullorum	NA	Henan	2015	NA	Lab
SAL03280	Gallinarum	Pullorum	NA	Henan	2015	NA	Lab
SAL03281	Gallinarum	Pullorum	NA	Henan	2015	NA	Lab
SAL03283	Gallinarum	Pullorum	NA	Henan	2015	NA	Lab
SAL03284	Gallinarum	Pullorum	NA	Henan	2015	NA	Lab
SAL03299	Gallinarum	Pullorum	NA	Henan	2015	NA	Lab
SAL03336	Gallinarum	Pullorum	NA	Henan	2015	NA	Lab
SAL03387	Gallinarum	Pullorum	NA	NA	2010	NA	Lab
SAL03389	Gallinarum	Pullorum	NA	NA	2012	NA	Lab
SAL03393	Gallinarum	Pullorum	NA	NA	1973	NA	Lab
SAL03398	Gallinarum	Pullorum	NA	NA	NA	NA	Lab
SAL03399	Gallinarum	Pullorum	NA	NA	NA	NA	Lab
SAL03400	Gallinarum	Pullorum	NA	NA	NA	NA	Lab
SAL03410	Gallinarum	Pullorum	NA	Guangxi	2018	chicken egg	Lab
SAL03412	Gallinarum	Pullorum	NA	Guangxi	2018	chicken egg	Lab
CL2001176	Gallinarum	Pullorum	NA	NA	NA	NA	Lab

## Sheet: Supp. Table3_R51-RV results
Feature ID	Type	Contig	Start	Stop	protegenicity	Frame	Strand	Length (bp)	Function	Subsystem	NCBI GI	locus		SOSUI（702）	BUSCA（517）	CELLO（910）	PSORTb（344）	SignalP（644）	VaxiJen（564）	SPAAN（1111）	TMHMM2.0(3875)	SoDoPE	conservations
1	CDS	R51_1	70	1401	95.7866	1	+	1332	Chromosomal replication initiator protein DnaA	Cell Division Subsystem including YidCD; <br>DNA replication cluster 1		locus|R51_00001		C (cytoplasmic)	C:cytoplasm	Cytoplasmic	Cytoplasmic			0.264374	0
2	CDS	R51_1	1406	2506	90.8175	2	+	1101	DNA polymerase III beta subunit (EC 2.7.7.7)	Cell Division Subsystem including YidCD; <br>DNA replication cluster 1		locus|R51_00002		C (cytoplasmic)	C:cytoplasm	Cytoplasmic	Cytoplasmic			0.324516	0						total	4713	1125
3	CDS	R51_1	2654	3727	90.9091	2	+	1074	DNA recombination and repair protein RecF	Cell Division Subsystem including YidCD; <br>DNA repair, bacterial RecFOR pathway; <br>DNA replication cluster 1; <br>Hypothetical Coupled to RecF		locus|R51_00003		C (cytoplasmic)	C:cytoplasm	Cytoplasmic	Cytoplasmic			0.300022	0						SOSUI	BUSCA	CELLO
4	CDS	R51_1	3756	6170	95.3515	3	+	2415	DNA gyrase subunit B (EC 5.99.1.3)	Cell Division Subsystem including YidCD; <br>DNA gyrase subunits; <br>DNA replication cluster 1; <br>DNA topoisomerases, Type II, ATP-dependent; <br>Resistance to fluoroquinolones		locus|R51_00004		C (cytoplasmic)	C:cytoplasm	Cytoplasmic	Cytoplasmic			0.297513	0					Cytoplasmic	2565	3052	2875
5	CDS	R51_1	7085	6189	88.894	-2	-	897	Putative LysR family transcriptional regulator	- none -		locus|R51_00005		unknown	C:cytoplasm	Cytoplasmic	Cytoplasmic			0.404099	0					Iinner membrane	969	1107	928
6	CDS	R51_1	8390	7200	93.9318	-2	-	1191	Putative mandelate racemase STM3833	- none -		locus|R51_00006		C (cytoplasmic)	C:cytoplasm	Cytoplasmic	Unknown			0.374377	0					Extracellular	157	438	144
7	CDS	R51_1	9670	8771	65.8805	-1	-	900	Putative permease	- none -		locus|R51_00007		IM (inner membrane)	C:plasma membrane	InnerMembrane	CytoplasmicMembrane			0.284882	6					Outer Membrane	184	79	171
8	CDS	R51_1	9975	10820	90.9091	3	+	846	Promiscuous sugar phosphatase YidA, haloacid dehalogenase-like phosphatase family	- none -		locus|R51_00008		C (cytoplasmic)	C:cytoplasm	Cytoplasmic	Cytoplasmic			0.471722	0					Periplasm	361		595
9	CDS	R51_1	11081	11770	90.9091	2	+	690	D-Galactonate repressor DgoR	D-galactonate catabolism		locus|R51_00009		C (cytoplasmic)	C:cytoplasm	Cytoplasmic	Cytoplasmic			0.212044	0					Unknown	477	37
10	CDS	R51_1	11767	12645	74.5363	1	+	879	2-dehydro-3-deoxygalactonokinase (EC 2.7.1.58)	D-galactonate catabolism		locus|R51_00010		C (cytoplasmic)	C:cytoplasm	Cytoplasmic	Unknown			0.552675	0
11	CDS	R51_1	12629	13246	88.5963	2	+	618	2-dehydro-3-deoxyphosphogalactonate aldolase (EC 4.1.2.21)	D-galactonate catabolism		locus|R51_00011		unknown	C:cytoplasm	Cytoplasmic	Cytoplasmic		Probable ANTIGEN	0.373146	0
12	CDS	R51_1	13243	14391	90.9091	1	+	1149	Galactonate dehydratase (EC 4.2.1.6)	D-galactonate catabolism; <br>Muconate lactonizing enzyme family		locus|R51_00012		C (cytoplasmic)	C:cytoplasm	Cytoplasmic	Cytoplasmic			0.127544	0
13	CDS	R51_1	14521	15813	90.7946	1	+	1293	D-galactonate transporter	D-galactonate catabolism		locus|R51_00013		IM (inner membrane)	C:plasma membrane	InnerMembrane	CytoplasmicMembrane			0.557138	11
14	CDS	R51_1	16978	15839	90.9091	-1	-	1140	Sensor protein torS (EC 2.7.3.-)	trimethylamine N-oxide (TMAO) reductase		locus|R51_00014		C (cytoplasmic)	C:cytoplasm	Cytoplasmic	CytoplasmicMembrane			0.318788	0
15	CDS	R51_1	18573	17050	92.7868	-3	-	1524	Sensor protein torS (EC 2.7.3.-)	trimethylamine N-oxide (TMAO) reductase		locus|R51_00015		IM (inner membrane)	C:plasma membrane	InnerMembrane	CytoplasmicMembrane			0.434382	2
16	CDS	R51_1	18859	20556	92.8784	1	+	1698	Trimethylamine-N-oxide reductase (EC 1.6.6.9)	trimethylamine N-oxide (TMAO) reductase		locus|R51_00016		C (cytoplasmic)	C:cytoplasm	Cytoplasmic	Unknown			0.419649	0
17	CDS	R51_1	20549	21181	90.9091	2	+	633	Chaperone protein TorD	trimethylamine N-oxide (TMAO) reductase		locus|R51_00017		C (cytoplasmic)	C:cytoplasm	Cytoplasmic	Cytoplasmic			0.30494	0
18	CDS	R51_1	21371	22771	96.7712	2	+	1401	Cytochrome c551 peroxidase (EC 1.11.1.5)	Protection from Reactive Oxygen Species		locus|R51_00018		IM (inner membrane)	C:plasma membrane	Periplasmic	Periplasmic			0.412927	1
19	CDS	R51_1	22768	23394	21.2503	1	+	627	ABC transporter involved in cytochrome c biogenesis, ATPase component CcmA	Biogenesis of c-type cytochromes		locus|R51_00019		C (cytoplasmic)	C:cytoplasm	Cytoplasmic	CytoplasmicMembrane			0.442761	0
20	CDS	R51_1	23394	24050	72.7273	3	+	657	ABC transporter involved in cytochrome c biogenesis, CcmB subunit	Biogenesis of c-type cytochromes		locus|R51_00020		IM (inner membrane)	C:plasma membrane	InnerMembrane	CytoplasmicMembrane			0.511555	6
21	CDS	R51_1	24093	24839	57.8429	3	+	747	Cytochrome c-type biogenesis protein CcmC, putative heme lyase for CcmE	Biogenesis of c-type cytochromes		locus|R51_00021		IM (inner membrane)	C:plasma membrane	InnerMembrane	CytoplasmicMembrane			0.361338	6
22	CDS	R51_1	24800	25048	4.534	2	+	249	Cytochrome c-type biogenesis protein CcmD, interacts with CcmCE	Biogenesis of c-type cytochromes		locus|R51_00022		IM (inner membrane)	C:plasma membrane	Cytoplasmic	CytoplasmicMembrane			0.309977	1
23	CDS	R51_1	25045	25524	79.7802	1	+	480	Cytochrome c-type biogenesis protein CcmE, heme chaperone	Biogenesis of c-type cytochromes		locus|R51_00023		P (Periplasm)	C:plasma membrane	Periplasmic	Unknown			0.258421	1
24	CDS	R51_1	25521	27452	90.9091	3	+	1932	Cytochrome c heme lyase subunit CcmF	Biogenesis of c-type cytochromes; <br>Copper homeostasis		locus|R51_00024		IM (inner membrane)	C:plasma membrane	InnerMembrane	CytoplasmicMembrane			0.442679	15
25	CDS	R51_1	27449	28006	89.7183	2	+	558	Cytochrome c-type biogenesis protein CcmG/DsbE, thiol:disulfide oxidoreductase	Biogenesis of c-type cytochromes; <br>Periplasmic disulfide interchange		locus|R51_00025		IM (inner membrane)	C:plasma membrane	InnerMembrane	CytoplasmicMembrane	SP		0.545025	1
26	CDS	R51_1	28003	29046	90.6572	1	+	1044	Cytochrome c heme lyase subunit CcmL / Cytochrome c heme lyase subunit CcmH	Biogenesis of c-type cytochromes; <br>Biogenesis of c-type cytochromes; <br>Copper homeostasis		locus|R51_00026		IM (inner membrane)	C:extracellular space	InnerMembrane	CytoplasmicMembrane	SP		0.304064	2
27	CDS	R51_1	29168	30394	90.9091	2	+	1227	Uncharacterized protein YidR	Mediator of hyperadherence YidE in Enterobacteria and its conserved region		locus|R51_00027		C (cytoplasmic)	C:cytoplasm	Extracellular	Unknown		Probable ANTIGEN	0.372271	0
28	CDS	R51_1	30686	30396	75.0401	-2	-	291	Outer membrane lipoprotein YidQ	Mediator of hyperadherence YidE in Enterobacteria and its conserved region		locus|R51_00028		C (cytoplasmic)	C:cytoplasm	Cytoplasmic	Unknown			0.61624	0
29	CDS	R51_1	31038	31451	81.0625	3	+	414	16 kDa heat shock protein A	Mediator of hyperadherence YidE in Enterobacteria and its conserved region		locus|R51_00029		C (cytoplasmic)	C:cytoplasm	Cytoplasmic	Cytoplasmic			0.286228	0
30	CDS	R51_1	31561	31989	75.8873	1	+	429	16 kDa heat shock protein B	Mediator of hyperadherence YidE in Enterobacteria and its conserved region		locus|R51_00030		C (cytoplasmic)	C:cytoplasm	Cytoplasmic	Cytoplasmic			0.506146	0
31	CDS	R51_1	32178	33839	90.9091	3	+	1662	Mediator of hyperadherence YidE	Mediator of hyperadherence YidE in Enterobacteria and its conserved region		locus|R51_00031		IM (inner membrane)	C:plasma membrane	InnerMembrane	CytoplasmicMembrane			0.507661	11
32	CDS	R51_1	34282	34629	14.7241	1	+	348	Putative inner membrane protein	- none -		locus|R51_00032		IM (inner membrane)	C:plasma membrane	InnerMembrane	CytoplasmicMembrane			0.619055	3
33	CDS	R51_1	34619	34981	12.2052	2	+	363	Putative inner membrane protein	- none -		locus|R51_00033		IM (inner membrane)	C:plasma membrane	InnerMembrane	CytoplasmicMembrane			0.48973	3
34	CDS	R51_1	34978	35508	60.8427	1	+	531	Putative arylsulfatase regulatory protein	- none -		locus|R51_00034		C (cytoplasmic)	C:cytoplasm	Cytoplasmic	Cytoplasmic			0.263228	0
35	CDS	R51_1	36912	35590	90.9091	-3	-	1323	D-serine dehydratase (EC 4.3.1.18)	Glycine and Serine Utilization; <br>Pyruvate Alanine Serine Interconversions		locus|R51_00035		C (cytoplasmic)	C:cytoplasm	Cytoplasmic	Cytoplasmic			0.578923	0
36	CDS	R51_1	38267	36930	90.0389	-2	-	1338	D-serine permease DsdX	Glycine and Serine Utilization		locus|R51_00036		IM (inner membrane)	C:plasma membrane	InnerMembrane	CytoplasmicMembrane			0.444219	12
37	CDS	R51_1	38493	39416	90.6114	3	+	924	D-serine dehydratase transcriptional activator	Glycine and Serine Utilization; <br>LysR-family proteins in Escherichia coli		locus|R51_00037		C (cytoplasmic)	C:cytoplasm	Cytoplasmic	Cytoplasmic			0.298611	0
38	CDS	R51_1	39504	39854	49.897	3	+	351	FIG00638667: hypothetical protein	- none -		locus|R51_00038		P (Periplasm)	C:outer membrane	Cytoplasmic	Unknown	SP		0.472624	0
39	CDS	R51_1	39869	40564	90.9091	2	+	696	FIG00638667: hypothetical protein	- none -		locus|R51_00039		C (cytoplasmic)	C:cytoplasm	Periplasmic	Unknown		Probable ANTIGEN	0.742314	0
40	CDS	R51_1	41675	40491	86.5354	-2	-	1185	Multidrug resistance protein D	- none -		locus|R51_00040		IM (inner membrane)	C:plasma membrane	InnerMembrane	CytoplasmicMembrane	SP		0.641766	12
41	CDS	R51_1	42069	41878	3.38905	-3	-	192	Integral membrane protein	- none -		locus|R51_00041		IM (inner membrane)	C:outer membrane	InnerMembrane	CytoplasmicMembrane			0.449726	2
42	CDS	R51_1	42710	42036	66.1782	-2	-	675	Integral membrane protein	- none -		locus|R51_00042		IM (inner membrane)	C:plasma membrane	InnerMembrane	CytoplasmicMembrane			0.42426	7
43	CDS	R51_1	42919	42830	0.206091	-1	-	90	hypothetical protein	- none -		locus|R51_00043		unknown		Cytoplasmic	Unknown		Probable ANTIGEN	0.396368	1
44	CDS	R51_1	43553	43651	12.251	2	+	99	hypothetical protein	- none -		locus|R51_00044		unknown		Cytoplasmic	Unknown			0.323813	0
45	CDS	R51_1	43758	45446	90.9091	3	+	1689	Acetolactate synthase large subunit (EC 2.2.1.6)	Acetolactate synthase subunits; <br>Branched-Chain Amino Acid Biosynthesis		locus|R51_00045		C (cytoplasmic)	C:cytoplasm	InnerMembrane	Cytoplasmic			0.22536	0
46	CDS	R51_1	45450	45740	67.3002	3	+	291	Acetolactate synthase small subunit (EC 2.2.1.6)	Acetolactate synthase subunits; <br>Branched-Chain Amino Acid Biosynthesis		locus|R51_00046		C (cytoplasmic)	C:cytoplasm	Cytoplasmic	Cytoplasmic			0.517987	0
47	CDS	R51_1	46527	45742	83.9707	-3	-	786	Deoxyribose operon repressor, DeoR family	Deoxyribose and Deoxynucleoside Catabolism		locus|R51_00047		C (cytoplasmic)	C:cytoplasm	Cytoplasmic	Unknown			0.439908	0
48	CDS	R51_1	46852	47772	90.9091	1	+	921	Ribokinase (EC 2.7.1.15)	D-ribose utilization; <br>Deoxyribose and Deoxynucleoside Catabolism		locus|R51_00048		C (cytoplasmic)	C:cytoplasm	Cytoplasmic	Cytoplasmic			0.531362	0
49	CDS	R51_1	47803	49119	90.9091	1	+	1317	Homolog of fucose/glucose/galactose permeases	Hexose Phosphate Uptake System		locus|R51_00049		IM (inner membrane)	C:plasma membrane	InnerMembrane	CytoplasmicMembrane			0.411267	12
50	CDS	R51_1	49131	50144	90.2679	3	+	1014	Putative uncharacterized protein STY3991	- none -		locus|R51_00050		C (cytoplasmic)	C:cytoplasm	Cytoplasmic	Unknown			0.425295	0
51	CDS	R51_1	50298	50888	90.6572	3	+	591	Transcriptional regulatory protein UhpA	Hexose Phosphate Uptake System		locus|R51_00051		C (cytoplasmic)	C:cytoplasm	Cytoplasmic	Cytoplasmic			0.622509	0
52	CDS	R51_1	50888	52390	90.9091	2	+	1503	Sensor histidine protein kinase UhpB, glucose-6-phosphate specific (EC 2.7.13.3)	Hexose Phosphate Uptake System		locus|R51_00052		IM (inner membrane)	C:plasma membrane	InnerMembrane	CytoplasmicMembrane			0.406023	7
53	CDS	R51_1	52400	53728	89.1001	2	+	1329	Hexose phosphate uptake regulatory protein UhpC	Hexose Phosphate Uptake System		locus|R51_00053		IM (inner membrane)	C:plasma membrane	InnerMembrane	CytoplasmicMembrane			0.419519	12
54	CDS	R51_1	53871	55262	90.9091	3	+	1392	Hexose phosphate transport protein UhpT	Hexose Phosphate Uptake System		locus|R51_00054		IM (inner membrane)	C:plasma membrane	InnerMembrane	CytoplasmicMembrane			0.556951	12
55	CDS	R51_1	55454	55906	57.5681	2	+	453	probable membrane protein YPO2654	- none -		locus|R51_00055		IM (inner membrane)	C:plasma membrane	InnerMembrane	CytoplasmicMembrane			0.322387	1
56	CDS	R51_1	56662	56339	87.3368	-1	-	324	Putative DNA-binding protein in cluster with Type I restriction-modification system	Restriction-Modification System		locus|R51_00056		C (cytoplasmic)	C:cytoplasm	Cytoplasmic	Unknown			0.409369	0
57	CDS	R51_1	57005	56646	64.5065	-2	-	360	FIG074102: hypothetical protein	- none -		locus|R51_00057		unknown	C:cytoplasm	Cytoplasmic	Unknown			0.456339	0
58	CDS	R51_1	57221	58414	88.4131	2	+	1194	Putative transport protein	- none -		locus|R51_00058		IM (inner membrane)	C:plasma membrane	InnerMembrane	CytoplasmicMembrane			0.504349	12
59	CDS	R51_1	59856	58474	92.7868	-3	-	1383	Beta-glucosidase (EC 3.2.1.21)	Beta-Glucoside Metabolism		locus|R51_00059		P (Periplasm)	C:cytoplasm	Cytoplasmic	Cytoplasmic			0.31753	0
60	CDS	R51_1	60255	59962	79.4367	-3	-	294	Putative secreted protein	- none -		locus|R51_00060		P (Periplasm)	C:extracellular space	Periplasmic	Unknown	SP		0.422726	0
61	CDS	R51_1	60452	63250	93.7257	2	+	2799	Transcriptional regulatory protein zraR	- none -		locus|R51_00061		C (cytoplasmic)	C:plasma membrane	Cytoplasmic	Cytoplasmic			0.349407	0
62	CDS	R51_1	63469	63894	56.5606	1	+	426	PTS system, mannose-specific IIA component	- none -		locus|R51_00062		C (cytoplasmic)	C:cytoplasm	Cytoplasmic	Unknown			0.382285	0
63	CDS	R51_1	63905	64390	79.2306	2	+	486	PTS system, gluconate-specific IIB component (EC 2.7.1.69)	- none -		locus|R51_00063		unknown	C:cytoplasm	Cytoplasmic	Cytoplasmic			0.564286	0
64	CDS	R51_1	64536	65285	84.0852	3	+	750	PTS system, mannose-specific IIC component	- none -		locus|R51_00064		IM (inner membrane)	C:plasma membrane	InnerMembrane	CytoplasmicMembrane			0.347352	5
65	CDS	R51_1	65285	66142	79.7802	2	+	858	PTS system, mannose-specific IID component (EC 2.7.1.69)	Mannose Metabolism; <br>Sialic Acid Metabolism		locus|R51_00065		IM (inner membrane)	C:plasma membrane	InnerMembrane	CytoplasmicMembrane			0.570988	5
66	CDS	R51_1	66146	67255	90.9091	2	+	1110	D-Glucosaminate-6-phosphate ammonia-lyase (EC 4.3.1.-)	- none -		locus|R51_00066		unknown	C:cytoplasm	Cytoplasmic	Cytoplasmic			0.228463	0
67	CDS	R51_1	67242	67985	89.8557	3	+	744	4-hydroxy-2-oxoglutarate aldolase (EC 4.1.3.16)	- none -		locus|R51_00067		C (cytoplasmic)	C:cytoplasm	Cytoplasmic	Unknown		Probable ANTIGEN	0.414009	0
68	CDS	R51_1	68221	69162	90.9091	1	+	942	Transposase	- none -		locus|R51_00068		C (cytoplasmic)	C:cytoplasm	Cytoplasmic	Cytoplasmic			0.413965	0
69	CDS	R51_1	70107	69205	66.8422	-3	-	903	Permease of the drug/metabolite transporter (DMT) superfamily	Queuosine-Archaeosine Biosynthesis		locus|R51_00069		IM (inner membrane)	C:plasma membrane	InnerMembrane	CytoplasmicMembrane			0.385607	10
70	CDS	R51_1	70631	71314	79.9405	2	+	684	Mg(2+) transport ATPase protein C	Magnesium transport		locus|R51_00070		IM (inner membrane)	C:plasma membrane	InnerMembrane	CytoplasmicMembrane			0.758753	4
71	CDS	R51_1	71534	74260	90.9091	2	+	2727	Mg(2+) transport ATPase, P-type (EC 3.6.3.2)	Magnesium transport		locus|R51_00071		IM (inner membrane)	C:plasma membrane	InnerMembrane	CytoplasmicMembrane			0.573064	8
72	CDS	R51_1	74282	74374	9.18251	2	+	93	hypothetical protein	- none -		locus|R51_00072		unknown		Cytoplasmic	CytoplasmicMembrane			0.639851	1
73	CDS	R51_1	74575	75012	90.9091	1	+	438	Putative inner membrane protein	- none -		locus|R51_00073		EC (Extracellular)	C:cytoplasm	Periplasmic	Unknown		Probable ANTIGEN	0.647746	1
74	CDS	R51_1	75860	75180	89.7183	-2	-	681	Nicotinamidase family protein YcaC	NAD and NADP cofactor biosynthesis global		locus|R51_00074		P (Periplasm)	C:plasma membrane	Cytoplasmic	Unknown			0.884853	0
75	CDS	R51_1	76644	77501	79.0245	3	+	858	Putative sensory transducer	- none -		locus|R51_00075		C (cytoplasmic)	C:plasma membrane	OuterMembrane	CytoplasmicMembrane		Probable ANTIGEN	0.371887	1
76	CDS	R51_1	77512	77976	88.4589	1	+	465	YqeJ protein	- none -		locus|R51_00076		unknown	C:cytoplasm	Cytoplasmic	Unknown			0.516085	0
185	CDS	R51_1	197869	197330	90.9091	-1	-	540	FIG00923183: possible membrane protein YebY	- none -		locus|R51_00186		P (Periplasm)	C:extracellular space	Periplasmic	Unknown	SP	Probable ANTIGEN	0.923073	0	0.4548	0.978022
78	CDS	R51_1	81630	81013	59.9496	-3	-	618	RmbA	- none -		locus|R51_00078		C (cytoplasmic)	C:cytoplasm	Cytoplasmic	Unknown			0.292186	0
79	CDS	R51_1	82644	82817	22.899	3	+	174	FIG01046502: hypothetical protein	- none -		locus|R51_00079		unknown	C:cytoplasm	Cytoplasmic	Unknown			0.439786	0
80	CDS	R51_1	83966	82929	90.9091	-2	-	1038	Putative DNA-binding protein in cluster with Type I restriction-modification system	Restriction-Modification System		locus|R51_00080		unknown	C:cytoplasm	Cytoplasmic	Cytoplasmic			0.410324	0
81	CDS	R51_1	84500	84153	60.7282	-2	-	348	FIG01046146: hypothetical protein	- none -		locus|R51_00081		C (cytoplasmic)	C:cytoplasm	Cytoplasmic	Unknown			0.423196	0
82	CDS	R51_1	85000	84500	82.7341	-1	-	501	ATP binding protein	- none -		locus|R51_00082		C (cytoplasmic)	C:cytoplasm	Cytoplasmic	Unknown			0.421829	0
83	CDS	R51_1	85494	84997	57.133	-3	-	498	ATP binding protein	- none -		locus|R51_00083		C (cytoplasmic)	C:cytoplasm	Cytoplasmic	Cytoplasmic			0.377495	0
84	CDS	R51_1	85685	85509	53.1486	-2	-	177	ATP binding protein	- none -		locus|R51_00084		unknown	C:cytoplasm	Cytoplasmic	Unknown			0.534422	0
85	CDS	R51_1	86363	86716	44.4241	2	+	354	FIG01046176: hypothetical protein	- none -		locus|R51_00085		C (cytoplasmic)	C:cytoplasm	Cytoplasmic	Unknown		Probable ANTIGEN	0.418941	0
86	CDS	R51_1	87407	88102	75.6583	2	+	696	Xyloside transporter XynT	Xylose utilization		locus|R51_00087		IM (inner membrane)	C:plasma membrane	InnerMembrane	CytoplasmicMembrane			0.658894	5
87	CDS	R51_1	88156	88788	62.354	1	+	633	Xyloside transporter XynT	Xylose utilization		locus|R51_00088		IM (inner membrane)	C:plasma membrane	InnerMembrane	CytoplasmicMembrane			0.378537	5
88	CDS	R51_1	88800	91118	92.1685	3	+	2319	Alpha-xylosidase (EC 3.2.1.-)	Xylose utilization		locus|R51_00089		C (cytoplasmic)	C:cytoplasm	Cytoplasmic	Unknown		Probable ANTIGEN	0.554479	0
89	CDS	R51_1	92930	91221	90.9091	-2	-	1710	FIG01200701: possible membrane protein	- none -		locus|R51_00090		IM (inner membrane)	C:plasma membrane	InnerMembrane	Unknown		Probable ANTIGEN	0.31104	1
90	CDS	R51_1	94442	93051	90.9091	-2	-	1392	Xanthine permease	Purine Utilization; <br>Xanthine Metabolism in Bacteria		locus|R51_00091		IM (inner membrane)	C:plasma membrane	InnerMembrane	CytoplasmicMembrane			0.297815	11
91	CDS	R51_1	94670	95875	88.4131	2	+	1206	Sodium/glutamate symport protein	Glutamate and Aspartate uptake in Bacteria		locus|R51_00092		IM (inner membrane)	C:plasma membrane	InnerMembrane	CytoplasmicMembrane			0.257494	9
92	CDS	R51_1	97992	95911	92.6494	-3	-	2082	ATP-dependent DNA helicase RecG (EC 3.6.1.-)	- none -		locus|R51_00093		C (cytoplasmic)	C:cytoplasm	Cytoplasmic	Cytoplasmic			0.40361	0
93	CDS	R51_1	98687	97998	87.4742	-2	-	690	tRNA (guanosine(18)-2&#39;-O)-methyltransferase (EC 2.1.1.34)	RNA methylation; <br>tRNA modification Bacteria		locus|R51_00094		C (cytoplasmic)	C:cytoplasm	Cytoplasmic	Cytoplasmic			0.342989	0
94	CDS	R51_1	100803	98692	92.1456	-3	-	2112	GTP pyrophosphokinase (EC 2.7.6.5), (p)ppGpp synthetase II / Guanosine-3&#39;,5&#39;-bis(diphosphate) 3&#39;-pyrophosphohydrolase (EC 3.1.7.2)	CBSS-176299.4.peg.1292; <br>CBSS-176299.4.peg.1292; <br>Stringent Response, (p)ppGpp metabolism; <br>Stringent Response, (p)ppGpp metabolism		locus|R51_00095		C (cytoplasmic)	C:cytoplasm	Cytoplasmic	Cytoplasmic			0.362707	0
95	CDS	R51_1	101097	100822	50.332	-3	-	276	DNA-directed RNA polymerase omega subunit (EC 2.7.7.6)	CBSS-176299.4.peg.1292; <br>RNA polymerase bacterial		locus|R51_00096		C (cytoplasmic)	C:cytoplasm	Cytoplasmic	Cytoplasmic			0.404949	0
96	CDS	R51_1	101775	101152	85.2301	-3	-	624	Guanylate kinase (EC 2.7.4.8)	CBSS-323097.3.peg.2594; <br>Purine conversions		locus|R51_00097		C (cytoplasmic)	C:cytoplasm	Cytoplasmic	Cytoplasmic			0.787539	0
97	CDS	R51_1	102032	103717	95.1225	2	+	1686	DNA ligase (EC 6.5.1.2), LigB	- none -		locus|R51_00098		unknown	C:extracellular space	Periplasmic	Cytoplasmic	SP		0.270509	0
98	CDS	R51_1	104331	103714	62.3769	-3	-	618	Putative inner membrane protein	- none -		locus|R51_00099		IM (inner membrane)	C:plasma membrane	InnerMembrane	CytoplasmicMembrane			0.233536	7
99	CDS	R51_1	105463	104582	90.9091	-1	-	882	Putative beta-lactamase	- none -		locus|R51_00100		P (Periplasm)	C:extracellular space	Periplasmic	Unknown	SP		0.415585	0
100	CDS	R51_1	105537	106439	90.9091	3	+	903	Transcriptional regulator, LysR family	- none -		locus|R51_00101		C (cytoplasmic)	C:cytoplasm	Cytoplasmic	Cytoplasmic			0.279017	0
101	CDS	R51_1	107352	106489	90.9091	-3	-	864	Protein YicC	CBSS-323097.3.peg.2594		locus|R51_00102		C (cytoplasmic)	C:cytoplasm	Cytoplasmic	Cytoplasmic			0.326156	0
102	CDS	R51_1	107478	108194	88.8711	3	+	717	Ribonuclease PH (EC 2.7.7.56)	Heat shock dnaK gene cluster extended; <br>tRNA processing		locus|R51_00103		unknown	C:cytoplasm	Cytoplasmic	Cytoplasmic			0.371323	0
103	CDS	R51_1	108272	108913	90.3824	2	+	642	Orotate phosphoribosyltransferase (EC 2.4.2.10)	De Novo Pyrimidine Synthesis		locus|R51_00104		C (cytoplasmic)	C:plasma membrane	Cytoplasmic	Cytoplasmic			0.295969	0
104	CDS	R51_1	109587	108991	89.9702	-3	-	597	Transcriptional regulator SlmA, TetR family	- none -		locus|R51_00105		C (cytoplasmic)	C:cytoplasm	Cytoplasmic	Cytoplasmic			0.319506	0
105	CDS	R51_1	110153	109695	66.3155	-2	-	459	Deoxyuridine 5&#39;-triphosphate nucleotidohydrolase (EC 3.6.1.23)	Housecleaning nucleoside triphosphate pyrophosphatases; <br>Nudix proteins (nucleoside triphosphate hydrolases)		locus|R51_00106		C (cytoplasmic)	C:cytoplasm	Cytoplasmic	Unknown		Probable ANTIGEN	0.253785	0
106	CDS	R51_1	111354	110131	92.0769	-3	-	1224	Phosphopantothenoylcysteine decarboxylase (EC 4.1.1.36) / Phosphopantothenoylcysteine synthetase (EC 6.3.2.5)	Coenzyme A Biosynthesis; <br>Coenzyme A Biosynthesis		locus|R51_00107		C (cytoplasmic)	C:plasma membrane	Cytoplasmic	Cytoplasmic			0.554584	0
107	CDS	R51_1	111527	112192	84.4745	2	+	666	DNA repair protein RadC	Bacterial cell division cluster; <br>DNA repair, bacterial		locus|R51_00108		C (cytoplasmic)	C:cytoplasm	Cytoplasmic	Cytoplasmic			0.286669	0
108	CDS	R51_1	112410	112646	28.7841	3	+	237	LSU ribosomal protein L28p	Ribosome LSU bacterial		locus|R51_00109		C (cytoplasmic)	C:cytoplasm	Cytoplasmic	Cytoplasmic			0.328635	0
109	CDS	R51_1	112667	112834	61.461	2	+	168	LSU ribosomal protein L33p @ LSU ribosomal protein L33p, zinc-independent	Ribosome LSU bacterial; <br>Ribosome LSU bacterial		locus|R51_00110		unknown	C:cytoplasm	Cytoplasmic	Cytoplasmic			0.369714	0
110	CDS	R51_1	112932	113741	80.5587	3	+	810	Formamidopyrimidine-DNA glycosylase (EC 3.2.2.23)	DNA Repair Base Excision		locus|R51_00111		C (cytoplasmic)	C:cytoplasm	Cytoplasmic	Cytoplasmic			0.358835	0
111	CDS	R51_1	114248	113769	83.3066	-2	-	480	Phosphopantetheine adenylyltransferase (EC 2.7.7.3)	CBSS-266117.6.peg.1260; <br>CBSS-269801.1.peg.1715; <br>Coenzyme A Biosynthesis		locus|R51_00112		C (cytoplasmic)	C:cytoplasm	Cytoplasmic	Cytoplasmic			0.479145	0
112	CDS	R51_1	115534	114257	90.9091	-1	-	1278	Lipid IVA 3-deoxy-D-manno-octulosonic acid transferase (EC 2.4.99.12) [often with (EC 2.4.99.13) also]	- none -		locus|R51_00113		IM (inner membrane)	C:plasma membrane	InnerMembrane	Unknown			0.219273	0
113	CDS	R51_1	115943	117013	90.9091	2	+	1071	Lipopolysaccharide heptosyltransferase III (EC 2.4.1.-)	LOS core oligosaccharide biosynthesis		locus|R51_00114		C (cytoplasmic)	C:cytoplasm	Cytoplasmic	Cytoplasmic			0.358063	0
114	CDS	R51_1	117010	118134	91.0923	1	+	1125	UDP-glucose:(heptosyl) LPS alpha1,3-glucosyltransferase WaaG (EC 2.4.1.-)	LOS core oligosaccharide biosynthesis		locus|R51_00115		C (cytoplasmic)	C:cytoplasm	Cytoplasmic	Cytoplasmic			0.366379	0
115	CDS	R51_1	118127	118924	90.3595	2	+	798	Lipopolysaccharide core biosynthesis protein WaaP (EC 2.7.-.-), heptosyl-I-kinase	LOS core oligosaccharide biosynthesis		locus|R51_00116		C (cytoplasmic)	C:cytoplasm	Cytoplasmic	Cytoplasmic			0.609578	0
116	CDS	R51_1	118980	119189	42.7754	3	+	210	UDP-glucose:(glucosyl)lipopolysaccharide alpha-1,3-glucosyltransferase WaaO (EC 2.4.1.-)	LOS core oligosaccharide biosynthesis		locus|R51_00117		C (cytoplasmic)	C:cytoplasm	Cytoplasmic	Unknown			0.423367	0
117	CDS	R51_1	119259	120338	90.9091	3	+	1080	Lipopolysaccharide 1,6-galactosyltransferase (EC 2.4.1.-)	LOS core oligosaccharide biosynthesis		locus|R51_00118		C (cytoplasmic)	C:cytoplasm	Cytoplasmic	Cytoplasmic			0.21799	0
118	CDS	R51_1	120344	121357	90.8633	2	+	1014	UDP-glucose:(glucosyl)lipopolysaccharide alpha-1,3-glucosyltransferase WaaO (EC 2.4.1.-)	LOS core oligosaccharide biosynthesis		locus|R51_00119		C (cytoplasmic)	C:plasma membrane	Cytoplasmic	Cytoplasmic			0.28712	0
119	CDS	R51_1	121375	122388	89.9473	1	+	1014	UDP-glucose:(glucosyl)lipopolysaccharide alpha-1,2-glucosyltransferase (EC 2.4.1.58)	LOS core oligosaccharide biosynthesis		locus|R51_00120		C (cytoplasmic)	C:plasma membrane	Cytoplasmic	Cytoplasmic			0.347568	0
120	CDS	R51_1	122411	123109	79.6886	2	+	699	Lipopolysaccharide core biosynthesis protein RfaY	LOS core oligosaccharide biosynthesis		locus|R51_00121		C (cytoplasmic)	C:cytoplasm	Cytoplasmic	Cytoplasmic			0.350543	0
121	CDS	R51_1	123259	124068	85.4591	1	+	810	Lipopolysaccharide core biosynthesis protein RfaZ	LOS core oligosaccharide biosynthesis		locus|R51_00122		C (cytoplasmic)	C:cytoplasm	Cytoplasmic	Cytoplasmic			0.423188	0
122	CDS	R51_1	124168	125313	94.2523	1	+	1146	Lipopolysaccharide 1,2-N-acetylglucosaminetransferase (EC 2.4.1.56)	LOS core oligosaccharide biosynthesis		locus|R51_00123		C (cytoplasmic)	C:plasma membrane	Cytoplasmic	Cytoplasmic	SP		0.29688	0
123	CDS	R51_1	126585	125371	90.9091	-3	-	1215	Oligosaccharide repeat unit polymerase Wzy; O-antigen ligase	Capsular Polysaccharides Biosynthesis and Assembly; <br>KDO2-Lipid A biosynthesis; <br>LOS core oligosaccharide biosynthesis		locus|R51_00124		IM (inner membrane)	C:plasma membrane	InnerMembrane	CytoplasmicMembrane			0.507687	10
124	CDS	R51_1	127578	126625	90.9091	-3	-	954	Lipopolysaccharide heptosyltransferase I (EC 2.4.1.-)	LOS core oligosaccharide biosynthesis		locus|R51_00125		C (cytoplasmic)	C:cytoplasm	Cytoplasmic	Cytoplasmic			0.40145	0
125	CDS	R51_1	128624	127578	90.9091	-2	-	1047	ADP-heptose--lipooligosaccharide heptosyltransferase II (EC 2.4.1.-)	LOS core oligosaccharide biosynthesis		locus|R51_00126		unknown	C:cytoplasm	Cytoplasmic	Cytoplasmic			0.275084	0
126	CDS	R51_1	129559	128627	91.0007	-1	-	933	ADP-L-glycero-D-manno-heptose-6-epimerase (EC 5.1.3.20)	LOS core oligosaccharide biosynthesis		locus|R51_00127		C (cytoplasmic)	C:cytoplasm	OuterMembrane	Cytoplasmic			0.404703	0
127	CDS	R51_1	129762	130958	90.932	3	+	1197	2-amino-3-ketobutyrate coenzyme A ligase (EC 2.3.1.29)	Glycine Biosynthesis; <br>Glycine and Serine Utilization		locus|R51_00128		C (cytoplasmic)	C:cytoplasm	Cytoplasmic	Cytoplasmic			0.485168	0
128	CDS	R51_1	130968	131993	90.9091	3	+	1026	L-threonine 3-dehydrogenase (EC 1.1.1.103)	Glycine Biosynthesis; <br>Threonine degradation		locus|R51_00129		C (cytoplasmic)	C:cytoplasm	Cytoplasmic	Cytoplasmic			0.5484	0
129	CDS	R51_1	132287	133321	90.9091	2	+	1035	Beta-1,3-galactosyltransferase / Beta-1,4-galactosyltransferase	LOS core oligosaccharide biosynthesis		locus|R51_00130		P (Periplasm)	C:cytoplasm	Cytoplasmic	CytoplasmicMembrane			0.393694	0
130	CDS	R51_1	134270	133308	90.9091	-2	-	963	Possible divergent polysaccharide deacetylase	- none -		locus|R51_00131		P (Periplasm)	C:plasma membrane	Periplasmic	Unknown	SP		0.546988	1
190	CDS	R51_1	201875	201213	93.2906	-2	-	663	Outer membrane protein A precursor	Osmoregulation		locus|R51_00191		OM (Outer Membrane)	C:cytoplasm	Extracellular	OuterMembrane	SP	Probable ANTIGEN	0.564945	3
132	CDS	R51_1	137111	135567	97.0918	-2	-	1545	2,3-bisphosphoglycerate-independent phosphoglycerate mutase (EC 5.4.2.1)	Entner-Doudoroff Pathway; <br>Glycolysis and Gluconeogenesis; <br>Phosphoglycerate mutase protein family		locus|R51_00133		C (cytoplasmic)	C:cytoplasm	Cytoplasmic	Cytoplasmic			0.547611	0
133	CDS	R51_1	137359	137790	60.4076	1	+	432	FIG136845: Rhodanese-related sulfurtransferase	Glutaredoxin 3 containing cluster		locus|R51_00134		IM (inner membrane)	C:cytoplasm	Cytoplasmic	Unknown			0.327199	1
134	CDS	R51_1	137877	138128	56.4919	3	+	252	Glutaredoxin 3 (Grx3)	Glutaredoxin 3 containing cluster; <br>Glutaredoxins; <br>Glutathione: Redox cycle		locus|R51_00135		C (cytoplasmic)	C:cytoplasm	Cytoplasmic	Unknown			0.340559	0
135	CDS	R51_1	138172	138639	89.123	1	+	468	Protein export cytoplasm chaperone protein (SecB, maintains protein to be exported in unfolded state)	Glutaredoxin 3 containing cluster		locus|R51_00136		C (cytoplasmic)	C:cytoplasm	Cytoplasmic	Cytoplasmic			0.478898	0
136	CDS	R51_1	138639	139658	90.9091	3	+	1020	Glycerol-3-phosphate dehydrogenase [NAD(P)+] (EC 1.1.1.94)	Glutaredoxin 3 containing cluster; <br>Glycerol and Glycerol-3-phosphate Uptake and Utilization; <br>Glycerolipid and Glycerophospholipid Metabolism in Bacteria		locus|R51_00137		C (cytoplasmic)	C:cytoplasm	Cytoplasmic	Cytoplasmic			0.410063	0
137	CDS	R51_1	139736	140557	90.9091	2	+	822	Serine acetyltransferase (EC 2.3.1.30)	Cysteine Biosynthesis; <br>Methionine Biosynthesis		locus|R51_00138		C (cytoplasmic)	C:cytoplasm	Cytoplasmic	Cytoplasmic			0.340697	0
138	CDS	R51_1	141137	140640	73.8035	-2	-	498	D-glucarate permease	D-galactarate, D-glucarate and D-glycerate catabolism; <br>D-galactarate, D-glucarate and D-glycerate catabolism - gjo		locus|R51_00139		IM (inner membrane)	C:plasma membrane	InnerMembrane	CytoplasmicMembrane			0.247841	5
139	CDS	R51_1	141950	141147	64.8729	-2	-	804	D-glucarate permease	D-galactarate, D-glucarate and D-glycerate catabolism; <br>D-galactarate, D-glucarate and D-glycerate catabolism - gjo		locus|R51_00140		IM (inner membrane)	C:plasma membrane	InnerMembrane	CytoplasmicMembrane			0.473104	7
140	CDS	R51_1	143220	142024	90.9091	-3	-	1197	L-talarate dehydratase @ Galactarate dehydratase (EC 4.2.1.42)	L-Talarate Dehydratase; <br>L-Talarate Dehydratase		locus|R51_00141		C (cytoplasmic)	C:cytoplasm	Cytoplasmic	Cytoplasmic			0.305859	0
141	CDS	R51_1	143539	144543	90.9091	1	+	1005	Transcriptional regulator, LacI family	- none -		locus|R51_00142		C (cytoplasmic)	C:cytoplasm	Cytoplasmic	Cytoplasmic			0.247888	0
142	CDS	R51_1	145084	144611	49.7825	-1	-	474	tRNA (cytidine(34)-2&#39;-O)-methyltransferase (EC 2.1.1.207)	Biotin synthesis cluster; <br>RNA methylation		locus|R51_00143		C (cytoplasmic)	C:cytoplasm	Cytoplasmic	Unknown			0.456973	0
143	CDS	R51_1	146340	145150	90.9091	-3	-	1191	L-lactate dehydrogenase (EC 1.1.2.3)	L-rhamnose utilization; <br>Lactate utilization; <br>Respiratory dehydrogenases 1		locus|R51_00144		C (cytoplasmic)	C:cytoplasm	Cytoplasmic	Cytoplasmic			0.905505	0
144	CDS	R51_1	147113	146337	90.3824	-2	-	777	Lactate-responsive regulator LldR in Enterobacteria, GntR family	Lactate utilization		locus|R51_00145		C (cytoplasmic)	C:cytoplasm	Cytoplasmic	Cytoplasmic			0.501022	0
145	CDS	R51_1	148765	147110	90.9091	-1	-	1656	L-lactate permease	Lactate utilization		locus|R51_00146		IM (inner membrane)	C:plasma membrane	InnerMembrane	CytoplasmicMembrane			0.35581	12
146	CDS	R51_1	153038	149064	94.55	-2	-	3975	Peptide transport system permease protein sapB (TC 3.A.1.5.5)	- none -		locus|R51_00147		EC (Extracellular)	C:cytoplasm	Extracellular	OuterMembrane		Probable ANTIGEN	0.384724	0
147	CDS	R51_1	153902	153219	90.9091	-2	-	684	Putative lipoprotein	- none -		locus|R51_00148		C (cytoplasmic)	C:extracellular space	Cytoplasmic	Unknown	SP		0.317312	0
148	CDS	R51_1	154752	154390	54.4081	-3	-	363	FIG00638433: Hypothetical protein YibL	- none -		locus|R51_00149		C (cytoplasmic)	C:cytoplasm	Cytoplasmic	Cytoplasmic		Probable ANTIGEN	0.434848	0
149	CDS	R51_1	155043	155252	37.6002	3	+	210	FIG074102: hypothetical protein	- none -		locus|R51_00150		C (cytoplasmic)	C:cytoplasm	Cytoplasmic	Unknown			0.377352	0
150	CDS	R51_1	155852	155262	64.3691	-2	-	591	Mannitol operon repressor	Mannitol Utilization		locus|R51_00151		C (cytoplasmic)	C:cytoplasm	Cytoplasmic	Cytoplasmic			0.36	0
151	CDS	R51_1	156997	155849	94.115	-1	-	1149	Mannitol-1-phosphate 5-dehydrogenase (EC 1.1.1.17)	Mannitol Utilization		locus|R51_00152		unknown	C:cytoplasm	Cytoplasmic	Cytoplasmic			0.279548	0
152	CDS	R51_1	159134	157218	90.932	-2	-	1917	PTS system, mannitol-specific IIC component (EC 2.7.1.69) / PTS system, mannitol-specific IIB component (EC 2.7.1.69) / PTS system, mannitol-specific IIA component	Mannitol Utilization; <br>Mannitol Utilization		locus|R51_00153		IM (inner membrane)	C:plasma membrane	InnerMembrane	CytoplasmicMembrane			0.285686	8
153	CDS	R51_1	159610	160218	83.8333	1	+	609	Uncharacterized GST-like protein yibF	Glutathione: Non-redox reactions		locus|R51_00154		unknown	C:cytoplasm	Cytoplasmic	Cytoplasmic			0.393853	0
154	CDS	R51_1	160317	161708	90.9091	3	+	1392	L-seryl-tRNA(Sec) selenium transferase (EC 2.9.1.1)	Selenocysteine metabolism		locus|R51_00155		C (cytoplasmic)	C:cytoplasm	Cytoplasmic	Cytoplasmic			0.427221	0
155	CDS	R51_1	161705	163555	90.9091	2	+	1851	Selenocysteine-specific translation elongation factor	Selenocysteine metabolism		locus|R51_00156		C (cytoplasmic)	C:cytoplasm	Cytoplasmic	Cytoplasmic			0.286939	0
156	CDS	R51_1	164684	163803	86.7186	-2	-	882	Putative sugar kinase	- none -		locus|R51_00157		unknown	C:cytoplasm	Cytoplasmic	Cytoplasmic			0.346723	0
157	CDS	R51_1	164853	166391	94.115	3	+	1539	Aldehyde dehydrogenase B (EC 1.2.1.22)	Glycerolipid and Glycerophospholipid Metabolism in Bacteria; <br>Methylglyoxal Metabolism		locus|R51_00158		C (cytoplasmic)	C:cytoplasm	Cytoplasmic	Cytoplasmic			0.49837	0
158	CDS	R51_1	168464	166509	90.9091	-2	-	1956	Putative glycosyl hydrolase of unknown function (DUF1680)	- none -		locus|R51_00159		C (cytoplasmic)	C:cytoplasm	Cytoplasmic	Cytoplasmic			0.284213	0
159	CDS	R51_1	168728	169543	87.9551	2	+	816	Putative arylsulfatase regulatory protein	- none -		locus|R51_00160		C (cytoplasmic)	C:cytoplasm	Cytoplasmic	Cytoplasmic			0.545943	0
160	CDS	R51_1	170399	169704	90.6114	-2	-	696	L-ribulose-5-phosphate 4-epimerase (EC 5.1.3.4)	L-Arabinose utilization; <br>L-ascorbate utilization (and related gene clusters)		locus|R51_00161		C (cytoplasmic)	C:cytoplasm	Cytoplasmic	Cytoplasmic			0.372961	0
161	CDS	R51_1	171253	170393	89.6496	-1	-	861	L-xylulose 5-phosphate 3-epimerase (EC 5.1.3.-) homolog	L-ascorbate utilization (and related gene clusters)		locus|R51_00162		C (cytoplasmic)	C:cytoplasm	Cytoplasmic	Cytoplasmic			0.473836	0
162	CDS	R51_1	171908	171246	81.5205	-2	-	663	3-keto-L-gulonate 6-phosphate decarboxylase homolog	L-ascorbate utilization (and related gene clusters)		locus|R51_00163		C (cytoplasmic)	C:cytoplasm	Cytoplasmic	Cytoplasmic			0.353725	0
163	CDS	R51_1	173401	171905	90.9091	-1	-	1497	L-xylulose/3-keto-L-gulonate kinase (EC 2.7.1.-)	L-ascorbate utilization (and related gene clusters)		locus|R51_00164		C (cytoplasmic)	C:cytoplasm	Cytoplasmic	Cytoplasmic			0.338833	0
164	CDS	R51_1	174391	173405	91.7106	-1	-	987	2,3-diketo-L-gulonate-binding periplasmic protein yiaO precursor	2,3-diketo-L-gulonate TRAP transporter		locus|R51_00165		P (Periplasm)	C:extracellular space	Periplasmic	Periplasmic	SP		0.30388	0
165	CDS	R51_1	175680	174403	90.8862	-3	-	1278	2,3-diketo-L-gulonate TRAP transporter large permease protein yiaN	2,3-diketo-L-gulonate TRAP transporter		locus|R51_00166		IM (inner membrane)	C:plasma membrane	InnerMembrane	CytoplasmicMembrane			0.387686	11
166	CDS	R51_1	176156	175683	65.0103	-2	-	474	2,3-diketo-L-gulonate TRAP transporter small permease protein yiaM	2,3-diketo-L-gulonate TRAP transporter		locus|R51_00167		IM (inner membrane)	C:plasma membrane	InnerMembrane	CytoplasmicMembrane			0.245452	4
167	CDS	R51_1	177227	176295	90.9091	-2	-	933	Putative chemotaxis protein, resembles cheA	- none -		locus|R51_00168		C (cytoplasmic)	C:cytoplasm	Cytoplasmic	Cytoplasmic			0.330951	0
168	CDS	R51_1	177715	177251	84.3142	-1	-	465	Protein yjgK	- none -		locus|R51_00169		C (cytoplasmic)	C:cytoplasm	Cytoplasmic	Cytoplasmic			0.441148	0
169	CDS	R51_1	178725	177727	90.9091	-3	-	999	3-dehydro-L-gulonate 2-dehydrogenase (EC 1.1.1.130)	L-ascorbate utilization (and related gene clusters)		locus|R51_00170		C (cytoplasmic)	C:cytoplasm	Cytoplasmic	Cytoplasmic			0.297651	0
170	CDS	R51_1	178955	179755	90.9091	2	+	801	Transcriptional regulator, IclR family	- none -		locus|R51_00171		C (cytoplasmic)	C:cytoplasm	Cytoplasmic	Cytoplasmic			0.660874	0
171	CDS	R51_1	179872	180345	72.9334	1	+	474	Electron transport protein HydN	- none -		locus|R51_00172		P (Periplasm)	C:cytoplasm	Cytoplasmic	Cytoplasmic			0.67313	0
172	CDS	R51_1	181632	180382	90.9091	-3	-	1251	Valine--pyruvate aminotransferase (EC 2.6.1.66)	Alanine biosynthesis; <br>Branched-Chain Amino Acid Biosynthesis; <br>Pyruvate Alanine Serine Interconversions		locus|R51_00173		C (cytoplasmic)	C:cytoplasm	Cytoplasmic	Cytoplasmic			0.2603	0
173	CDS	R51_1	183833	181806	97.3666	-2	-	2028	Periplasmic alpha-amylase (EC 3.2.1.1)	Maltose and Maltodextrin Utilization		locus|R51_00174		P (Periplasm)	C:extracellular space	Periplasmic	Periplasmic	SP		0.599491	0
194	CDS	R51_1	205486	206190	90.932	1	+	705	FIG00543870: hypothetical protein	- none -		locus|R51_00195		EC (Extracellular)	C:extracellular space	Extracellular	Unknown	SP	Probable ANTIGEN	0.540366	1	0.3854
175	CDS	R51_1	186212	185034	90.9091	-2	-	1179	Xylose activator XylR (AraC family)	Xylose utilization		locus|R51_00176		C (cytoplasmic)	C:cytoplasm	Cytoplasmic	Cytoplasmic			0.298189	0
176	CDS	R51_1	186575	187897	93.2906	2	+	1323	Xylose isomerase (EC 5.3.1.5)	Xylose utilization		locus|R51_00177		C (cytoplasmic)	C:cytoplasm	Cytoplasmic	Cytoplasmic			0.365504	0
177	CDS	R51_1	187997	189451	90.9091	2	+	1455	Xylulose kinase (EC 2.7.1.17)	Xylose utilization		locus|R51_00178		C (cytoplasmic)	C:cytoplasm	Cytoplasmic	CytoplasmicMembrane			0.78278	0
178	CDS	R51_1	189626	189979	15.7774	2	+	354	Inner membrane protein YiaB	- none -		locus|R51_00179		IM (inner membrane)	C:plasma membrane	InnerMembrane	CytoplasmicMembrane			0.4217	3
179	CDS	R51_1	190997	190002	77.6048	-2	-	996	Inner membrane protein YiaH	- none -		locus|R51_00180		IM (inner membrane)	C:plasma membrane	InnerMembrane	CytoplasmicMembrane			0.274365	10
195	CDS	R51_1	206707	207231	94.8935	1	+	525	Long polar fimbria protein A precursor	- none -		locus|R51_00196		OM (Outer Membrane)	C:extracellular space	Extracellular	Extracellular	SP	Probable ANTIGEN	0.634914	0	0.7365	0.994505
181	CDS	R51_1	191604	192515	90.9091	3	+	912	Glycyl-tRNA synthetase alpha chain (EC 6.1.1.14)	Glycyl-tRNA synthetase; <br>Glycyl-tRNA synthetase containing cluster; <br>tRNA aminoacylation, Gly		locus|R51_00182		C (cytoplasmic)	C:cytoplasm	Cytoplasmic	Cytoplasmic			0.436305	0
182	CDS	R51_1	192525	194594	96.9315	3	+	2070	Glycyl-tRNA synthetase beta chain (EC 6.1.1.14)	Glycyl-tRNA synthetase; <br>Glycyl-tRNA synthetase containing cluster; <br>tRNA aminoacylation, Gly		locus|R51_00183		C (cytoplasmic)	C:cytoplasm	Cytoplasmic	Cytoplasmic			0.781802	0
183	CDS	R51_1	196220	196486	57.1101	2	+	267	FIG032766: hypothetical protein	CBSS-374931.9.peg.1048		locus|R51_00184		C (cytoplasmic)	C:cytoplasm	Cytoplasmic	Unknown			0.732276	0
184	CDS	R51_1	196474	196959	70.1397	1	+	486	FIG001353: Acetyltransferase	CBSS-374931.9.peg.1048		locus|R51_00185		C (cytoplasmic)	C:cytoplasm	Cytoplasmic	Unknown			0.301795	0
196	CDS	R51_1	207316	208014	90.9091	1	+	699	Chaperone protein lpfB precursor	- none -		locus|R51_00197		P (Periplasm)	C:extracellular space	Periplasmic	Periplasmic	SP	Probable ANTIGEN	0.848945	1	0.6306	0.994505
186	CDS	R51_1	198255	198043	90.9091	-3	-	213	Cold shock protein CspA	Cold shock, CspA family of proteins		locus|R51_00187		C (cytoplasmic)	C:cytoplasm	Periplasmic	Cytoplasmic			0.366176	0
187	CDS	R51_1	198875	198543	65.9263	-2	-	333	FIG00638451: hypothetical protein	- none -		locus|R51_00188		C (cytoplasmic)	C:cytoplasm	Cytoplasmic	Unknown			0.526133	0
188	CDS	R51_1	199272	199982	90.9091	3	+	711	probable exported protein YPO4070	- none -		locus|R51_00189		unknown	C:extracellular space	Periplasmic	CytoplasmicMembrane	SP		0.383488	1
189	CDS	R51_1	200994	200032	90.8633	-3	-	963	2-ketoaldonate reductase, broad specificity (EC 1.1.1.215) (EC 1.1.1.-)	D-gluconate and ketogluconates metabolism		locus|R51_00190		C (cytoplasmic)	C:cytoplasm	Cytoplasmic	Cytoplasmic			0.40526	0
262	CDS	R51_1	286747	286190	91.4587	-1	-	558	DcrB protein precursor	- none -		locus|R51_00264		OM (Outer Membrane)	C:extracellular space	Periplasmic	Periplasmic	SP	Probable ANTIGEN	0.537015	0	0.7069	0.994505
191	CDS	R51_1	202028	204361	90.9091	2	+	2334	Anaerobic dimethyl sulfoxide reductase chain A (EC 1.8.5.3)	- none -		locus|R51_00192		C (cytoplasmic)	C:cytoplasm	Periplasmic	Periplasmic			0.693797	0
192	CDS	R51_1	204770	204330	85.4362	-2	-	441	Acetyltransferase (EC 2.3.1.-)	- none -		locus|R51_00193		C (cytoplasmic)	C:cytoplasm	Cytoplasmic	Unknown			0.910964	0
193	CDS	R51_1	205329	204748	64.1859	-3	-	582	DNA-3-methyladenine glycosylase (EC 3.2.2.20)	CBSS-326442.4.peg.1852; <br>DNA Repair Base Excision		locus|R51_00194		C (cytoplasmic)	C:cytoplasm	Cytoplasmic	Cytoplasmic			0.610532	0
362	CDS	R51_1	398444	398274	56.469	-2	-	171	putative outer membrane lipoprotein	- none -		locus|R51_00364		unknown	C:cytoplasm	Cytoplasmic	Unknown	SP	Probable ANTIGEN	0.6997	0
559	CDS	R51_1	585900	585787	26.8605	-3	-	114	hypothetical protein	- none -		locus|R51_00573		unknown		Cytoplasmic	Unknown	SP	Probable ANTIGEN	0.567167	0
687	CDS	R51_1	726499	727137	90.9091	1	+	639	YjbF outer membrane lipoprotein	YjbEFGH Locus Involved in Exopolysaccharide Production		locus|R51_00706		EC (Extracellular)	C:extracellular space	OuterMembrane	Unknown	SP	Probable ANTIGEN	0.756202	0	0.5036	0.972527
197	CDS	R51_1	208037	208348	32.0357	2	+	312	long polar fimbrial outer membrane usher protein	- none -		locus|R51_00198		P (Periplasm)	C:plasma membrane	Periplasmic	Unknown	SP		0.849653	0	0.4816
198	CDS	R51_1	208321	210564	95.7408	1	+	2244	type 1 fimbriae anchoring protein FimD	Type 1 pili (mannose-sensitive fimbriae, gamma-fimbriae)		locus|R51_00199		OM (Outer Membrane)	C:cytoplasm	OuterMembrane	OuterMembrane		Probable ANTIGEN	0.540148	0	0.5086
695	CDS	R51_1	736017	737375	97.6643	3	+	1359	Maltoporin (maltose/maltodextrin high-affinity receptor, phage lambda receptor protein)	Maltose and Maltodextrin Utilization; <br>Trehalose Uptake and Utilization		locus|R51_00714		OM (Outer Membrane)	C:extracellular space	OuterMembrane	OuterMembrane	SP	Probable ANTIGEN	0.565281	0	0.5868	0.9945
747	CDS	R51_1	811411	810992	85.4362	-1	-	420	Formate dehydrogenase H (EC 1.2.1.2) @ selenocysteine-containing	Formate dehydrogenase; <br>Selenocysteine metabolism		locus|R51_00766		unknown	C:cytoplasm	Periplasmic	Cytoplasmic	SP	Probable ANTIGEN	0.505817	0	0.5086	0.9945
201	CDS	R51_1	212411	214102	90.932	2	+	1692	Phosphoethanolamine transferase specific for the outer Kdo residue of lipopolysaccharide	Lipid A modifications		locus|R51_00202		IM (inner membrane)	C:plasma membrane	InnerMembrane	CytoplasmicMembrane			0.474572	5
202	CDS	R51_1	215422	214415	87.6803	-1	-	1008	Putative lacI-family transcriptional regulator	- none -		locus|R51_00204		C (cytoplasmic)	C:cytoplasm	InnerMembrane	CytoplasmicMembrane			0.444203	1
203	CDS	R51_1	215572	216696	90.8862	1	+	1125	Putative PQQ enzyme repeat	- none -		locus|R51_00205		C (cytoplasmic)	C:cytoplasm	Cytoplasmic	Unknown			0.418608	0
204	CDS	R51_1	216754	218079	90.6114	1	+	1326	Xanthine permease	Purine Utilization; <br>Xanthine Metabolism in Bacteria		locus|R51_00206		IM (inner membrane)	C:plasma membrane	InnerMembrane	CytoplasmicMembrane			0.422095	13
205	CDS	R51_1	218635	220242	97.4811	1	+	1608	Dipeptide-binding ABC transporter, periplasmic substrate-binding component (TC 3.A.1.5.2)	ABC transporter dipeptide (TC 3.A.1.5.2); <br>Bacterial Chemotaxis		locus|R51_00207		P (Periplasm)	C:extracellular space	Periplasmic	Periplasmic	SP		0.349139	0
206	CDS	R51_1	220399	220665	22.6242	1	+	267	Dipeptide transport system permease protein DppB (TC 3.A.1.5.2)	ABC transporter dipeptide (TC 3.A.1.5.2)		locus|R51_00208		IM (inner membrane)	C:plasma membrane	InnerMembrane	CytoplasmicMembrane			0.335073	1
207	CDS	R51_1	220675	221418	72.2235	1	+	744	Dipeptide transport system permease protein DppB (TC 3.A.1.5.2)	ABC transporter dipeptide (TC 3.A.1.5.2)		locus|R51_00209		IM (inner membrane)	C:plasma membrane	InnerMembrane	CytoplasmicMembrane			0.291823	5
208	CDS	R51_1	221428	222330	73.0937	1	+	903	Dipeptide transport system permease protein DppC (TC 3.A.1.5.2)	ABC transporter dipeptide (TC 3.A.1.5.2)		locus|R51_00210		IM (inner membrane)	C:plasma membrane	InnerMembrane	CytoplasmicMembrane			0.430948	5
209	CDS	R51_1	222341	223324	90.9091	2	+	984	Dipeptide transport ATP-binding protein DppD (TC 3.A.1.5.2)	ABC transporter dipeptide (TC 3.A.1.5.2)		locus|R51_00211		C (cytoplasmic)	C:cytoplasm	Cytoplasmic	CytoplasmicMembrane			0.686369	0
210	CDS	R51_1	223321	224334	90.9091	1	+	1014	Dipeptide transport ATP-binding protein DppF (TC 3.A.1.5.2)	ABC transporter dipeptide (TC 3.A.1.5.2)		locus|R51_00212		C (cytoplasmic)	C:cytoplasm	Cytoplasmic	CytoplasmicMembrane			0.868788	0
211	CDS	R51_1	225733	224435	90.9091	-1	-	1299	Serine transporter	Glycine and Serine Utilization; <br>Pyruvate Alanine Serine Interconversions		locus|R51_00213		IM (inner membrane)	C:plasma membrane	InnerMembrane	CytoplasmicMembrane			0.411544	11
212	CDS	R51_1	226936	226565	70.9411	-1	-	372	FIG002337: predicted inner membrane protein	- none -		locus|R51_00214		EC (Extracellular)	C:cytoplasm	Periplasmic	Unknown		Probable ANTIGEN	0.297397	0
818	CDS	R51_1	882105	883424	95.7637	3	+	1320	N-acetylmuramoyl-L-alanine amidase (EC 3.5.1.28)	Murein Hydrolases; <br>Recycling of Peptidoglycan Amino Acids; <br>Zinc regulated enzymes		locus|R51_00841		OM (Outer Membrane)	C:extracellular space	OuterMembrane	Unknown	SP	Probable ANTIGEN	0.522151	0	0.7163	0.978022
214	CDS	R51_1	228244	227858	0.847264	-1	-	387	FIG002337: predicted inner membrane protein	- none -		locus|R51_00216		IM (inner membrane)	C:plasma membrane	InnerMembrane	CytoplasmicMembrane			0.461287	3
215	CDS	R51_1	228432	228241	7.90016	-3	-	192	FIG005119: putative inner membrane protein	- none -		locus|R51_00217		IM (inner membrane)	C:plasma membrane	Cytoplasmic	Unknown			0.469963	1
216	CDS	R51_1	229988	228429	90.9091	-2	-	1560	FIG005274: hypothetical protein	- none -		locus|R51_00218		C (cytoplasmic)	C:cytoplasm	Cytoplasmic	Unknown			0.2752	0
217	CDS	R51_1	230245	230448	5.79345	1	+	204	FIG004405: Putative cytoplasmic protein	- none -		locus|R51_00219		C (cytoplasmic)	C:cytoplasm	Cytoplasmic	Unknown			0.290455	0
218	CDS	R51_1	230449	231201	64.4607	1	+	753	Cellulose synthase, putative	- none -		locus|R51_00220		unknown	C:cytoplasm	Cytoplasmic	Unknown			0.500509	0
219	CDS	R51_1	231198	233822	90.9091	3	+	2625	Cellulose synthase catalytic subunit [UDP-forming] (EC 2.4.1.12)	- none -		locus|R51_00221		IM (inner membrane)	C:plasma membrane	InnerMembrane	CytoplasmicMembrane			0.464443	10
220	CDS	R51_1	233983	236133	92.3059	1	+	2151	Cyclic di-GMP binding protein precursor	- none -		locus|R51_00222		IM (inner membrane)	C:plasma membrane	Periplasmic	CytoplasmicMembrane			0.289997	1
221	CDS	R51_1	236137	237246	91.2755	1	+	1110	Endoglucanase precursor (EC 3.2.1.4)	- none -		locus|R51_00223		EC (Extracellular)	C:extracellular space	Periplasmic	Extracellular	SP		0.381414	1
859	CDS	R51_1	919483	920871	92.512	1	+	1389	FIG01200701: possible membrane protein	- none -		locus|R51_00882		P (Periplasm)	C:plasma membrane	OuterMembrane	Unknown	SP	Probable ANTIGEN	0.512731	1	0.4374
223	CDS	R51_1	240698	242704	90.9091	2	+	2007	Protein yhjK	- none -		locus|R51_00225		IM (inner membrane)	C:plasma membrane	InnerMembrane	CytoplasmicMembrane			0.583934	2
224	CDS	R51_1	242862	244148	90.9091	3	+	1287	Aerobic C4-dicarboxylate transporter for fumarate, L-malate, D-malate, succunate	- none -		locus|R51_00226		IM (inner membrane)	C:plasma membrane	InnerMembrane	CytoplasmicMembrane			0.387446	9
225	CDS	R51_1	244368	245855	96.5194	3	+	1488	Protein YhjJ, putative peptidase	Inner membrane protein YhjD and conserved cluster involved in LPS biosynthesis		locus|R51_00227		unknown	C:extracellular space	Periplasmic	Unknown	SP		0.393019	0
226	CDS	R51_1	246838	245909	90.9091	-1	-	930	2-dehydro-3-deoxygluconate kinase (EC 2.7.1.45)	D-Galacturonate and D-Glucuronate Utilization; <br>D-gluconate and ketogluconates metabolism; <br>Entner-Doudoroff Pathway		locus|R51_00228		C (cytoplasmic)	C:cytoplasm	Cytoplasmic	Unknown			0.525115	0
227	CDS	R51_1	247067	247453	47.9505	2	+	387	GGDEF/EAL domain protein YhjH	Inner membrane protein YhjD and conserved cluster involved in LPS biosynthesis		locus|R51_00229		C (cytoplasmic)	C:cytoplasm	Cytoplasmic	Cytoplasmic			0.571699	0
228	CDS	R51_1	247511	247834	35.837	2	+	324	GGDEF/EAL domain protein YhjH	Inner membrane protein YhjD and conserved cluster involved in LPS biosynthesis		locus|R51_00230		C (cytoplasmic)	C:cytoplasm	Cytoplasmic	CytoplasmicMembrane			0.35607	0
229	CDS	R51_1	247944	250004	97.0918	3	+	2061	Uncharacterized protein YhjG	Inner membrane protein YhjD and conserved cluster involved in LPS biosynthesis		locus|R51_00231		IM (inner membrane)	C:plasma membrane	Cytoplasmic	Unknown		Probable ANTIGEN	0.330238	1
230	CDS	R51_1	251366	250044	84.2913	-2	-	1323	Inner membrane metabolite transport protein YhjE	Inner membrane protein YhjD and conserved cluster involved in LPS biosynthesis		locus|R51_00232		IM (inner membrane)	C:plasma membrane	InnerMembrane	CytoplasmicMembrane			0.38046	11
231	CDS	R51_1	252745	251717	77.8567	-1	-	1029	Inner membrane protein YhjD	Inner membrane protein YhjD and conserved cluster involved in LPS biosynthesis		locus|R51_00233		IM (inner membrane)	C:plasma membrane	InnerMembrane	CytoplasmicMembrane			0.383243	6
232	CDS	R51_1	253717	252818	90.016	-1	-	900	LysR family transcriptional regulator YhjC	Inner membrane protein YhjD and conserved cluster involved in LPS biosynthesis; <br>LysR-family proteins in Escherichia coli		locus|R51_00234		C (cytoplasmic)	C:cytoplasm	Cytoplasmic	Cytoplasmic			0.538166	0
233	CDS	R51_1	254348	254950	89.1688	2	+	603	Putative regulator	- none -		locus|R51_00235		C (cytoplasmic)	C:cytoplasm	Cytoplasmic	Cytoplasmic			0.306868	0
234	CDS	R51_1	255312	254956	63.1784	-3	-	357	Phage-like lysozyme	- none -		locus|R51_00236		C (cytoplasmic)	C:cytoplasm	Cytoplasmic	Unknown			0.2498	0
235	CDS	R51_1	255593	255877	37.0048	2	+	285	Putative inner membrane protein	- none -		locus|R51_00237		unknown	C:cytoplasm	Cytoplasmic	Unknown			0.395115	0
236	CDS	R51_1	255874	257181	90.9091	1	+	1308	Putative inner membrane protein	- none -		locus|R51_00238		IM (inner membrane)	C:cytoplasm	Cytoplasmic	CytoplasmicMembrane			0.502449	0
237	CDS	R51_1	258843	257194	91.7106	-3	-	1650	Cytoplasmic trehalase (EC 3.2.1.28)	Trehalose Uptake and Utilization		locus|R51_00239		C (cytoplasmic)	C:cytoplasm	Cytoplasmic	Cytoplasmic			0.741344	0
238	CDS	R51_1	259169	259888	90.5427	2	+	720	Transcriptional regulator, GntR family	- none -		locus|R51_00240		C (cytoplasmic)	C:cytoplasm	Cytoplasmic	Cytoplasmic			0.530018	0
239	CDS	R51_1	260064	261041	90.9091	3	+	978	Putative phosphosugar-binding protein	- none -		locus|R51_00241		C (cytoplasmic)	C:cytoplasm	Cytoplasmic	Unknown			0.646438	0
240	CDS	R51_1	261105	261950	90.9091	3	+	846	kinase (ribokinase family)	- none -		locus|R51_00242		C (cytoplasmic)	C:cytoplasm	Extracellular	Cytoplasmic			0.338577	0
241	CDS	R51_1	262004	263323	90.7717	2	+	1320	anaerobic C4-dicarboxylate transporter	- none -		locus|R51_00243		IM (inner membrane)	C:plasma membrane	InnerMembrane	CytoplasmicMembrane			0.453534	11
1041	CDS	R51_1	1097452	1094915	96.7712	-1	-	2538	type 1 fimbriae anchoring protein FimD	Type 1 pili (mannose-sensitive fimbriae, gamma-fimbriae)		locus|R51_01068		OM (Outer Membrane)	C:plasma membrane	OuterMembrane	OuterMembrane	SP	Probable ANTIGEN	0.503313	0	0.6204	0.994505
243	CDS	R51_1	265824	264472	91.7106	-3	-	1353	Glutathione reductase (EC 1.8.1.7)	Glutathione: Redox cycle		locus|R51_00245		C (cytoplasmic)	C:cytoplasm	Cytoplasmic	Cytoplasmic			0.318172	0
244	CDS	R51_1	266760	265918	90.1076	-3	-	843	Protein involved in catabolism of external DNA	DNA processing cluster		locus|R51_00246		C (cytoplasmic)	C:cytoplasm	Cytoplasmic	Cytoplasmic			0.252746	0
245	CDS	R51_1	266971	268242	94.4126	1	+	1272	Putative phosphatase	- none -		locus|R51_00247		P (Periplasm)	C:extracellular space	Periplasmic	Periplasmic	SP		0.488594	0
246	CDS	R51_1	268424	270466	91.2526	2	+	2043	Oligopeptidase A (EC 3.4.24.70)	Protein degradation		locus|R51_00248		C (cytoplasmic)	C:cytoplasm	Cytoplasmic	Cytoplasmic			0.300897	0
247	CDS	R51_1	270488	271231	83.3524	2	+	744	rRNA small subunit methyltransferase J	- none -		locus|R51_00249		C (cytoplasmic)	C:cytoplasm	Cytoplasmic	Unknown			0.55247	0
248	CDS	R51_1	272795	271323	90.9091	-2	-	1473	Di/tripeptide permease DtpB	Proton-dependent Peptide Transporters		locus|R51_00250		IM (inner membrane)	C:plasma membrane	InnerMembrane	CytoplasmicMembrane			0.564325	14
249	CDS	R51_1	273554	273120	90.9091	-2	-	435	Universal stress protein A	Universal stress protein family		locus|R51_00251		C (cytoplasmic)	C:cytoplasm	Cytoplasmic	Cytoplasmic			0.45549	0
250	CDS	R51_1	273942	274277	46.0728	3	+	336	Universal stress protein B	Universal stress protein family		locus|R51_00252		IM (inner membrane)	C:plasma membrane	InnerMembrane	CytoplasmicMembrane			0.503678	2
251	CDS	R51_1	275914	274418	90.9091	-1	-	1497	Low-affinity inorganic phosphate transporter	Phosphate metabolism		locus|R51_00253		IM (inner membrane)	C:plasma membrane	InnerMembrane	CytoplasmicMembrane			0.396418	9
252	CDS	R51_1	276145	276384	51.0419	1	+	240	NAD(FAD)-utilizing dehydrogenases	- none -		locus|R51_00254		P (Periplasm)	C:cytoplasm	Periplasmic	Unknown	SP		0.30406	0
253	CDS	R51_1	276481	277341	90.4969	1	+	861	NAD(FAD)-utilizing dehydrogenases	- none -		locus|R51_00255		unknown	C:cytoplasm	OuterMembrane	Cytoplasmic		Probable ANTIGEN	0.569798	0
254	CDS	R51_1	277647	278714	90.9091	3	+	1068	Putative membrane protein	- none -		locus|R51_00256		OM (Outer Membrane)	C:plasma membrane	Cytoplasmic	CytoplasmicMembrane			0.549149	1
255	CDS	R51_1	278711	280516	91.39	2	+	1806	ABC-type multidrug transport system, permease component	- none -		locus|R51_00257		C (cytoplasmic)	C:cytoplasm	InnerMembrane	CytoplasmicMembrane			0.385264	1
256	CDS	R51_1	280598	281452	90.4511	2	+	855	ABC-type multidrug transport system, permease component	- none -		locus|R51_00258		IM (inner membrane)	C:plasma membrane	InnerMembrane	CytoplasmicMembrane			0.524776	5
257	CDS	R51_1	281452	282576	88.3215	1	+	1125	FIG01045128: hypothetical protein	- none -		locus|R51_00259		IM (inner membrane)	C:plasma membrane	InnerMembrane	CytoplasmicMembrane			0.390838	6
258	CDS	R51_1	283102	282665	59.7664	-1	-	438	Nickel responsive regulator NikR	Transport of Nickel and Cobalt		locus|R51_00260		C (cytoplasmic)	C:cytoplasm	Cytoplasmic	Cytoplasmic			0.39059	0
259	CDS	R51_1	283736	283158	57.133	-2	-	579	4&#39;-phosphopantetheinyl transferase (EC 2.7.8.-)	Fatty Acid Biosynthesis FASII		locus|R51_00261		C (cytoplasmic)	C:cytoplasm	Periplasmic	Unknown		Probable ANTIGEN	0.554023	0
260	CDS	R51_1	284837	283788	87.5658	-2	-	1050	Putative PerM family permease	- none -		locus|R51_00262		IM (inner membrane)	C:plasma membrane	InnerMembrane	CytoplasmicMembrane			0.381022	8
261	CDS	R51_1	284969	286186	84.9324	2	+	1218	Transporter, putative	- none -		locus|R51_00263		IM (inner membrane)	C:plasma membrane	InnerMembrane	CytoplasmicMembrane			0.503942	12
1044	CDS	R51_1	1098797	1098252	94.9164	-2	-	546	putative fimbrial protein	- none -		locus|R51_01071		EC (Extracellular)	C:outer membrane	Extracellular	Extracellular	SP	Probable ANTIGEN	0.576317	0	0.6858	0.972527
263	CDS	R51_1	287485	286820	60.316	-1	-	666	Putative preQ0 transporter	Queuosine-Archaeosine Biosynthesis		locus|R51_00265		IM (inner membrane)	C:plasma membrane	InnerMembrane	CytoplasmicMembrane			0.376821	6
264	CDS	R51_1	287565	287900	79.2077	3	+	336	tRNA 5-methylaminomethyl-2-thiouridine synthase TusA	mnm5U34 biosynthesis bacteria; <br>tRNA modification Bacteria		locus|R51_00266		C (cytoplasmic)	C:cytoplasm	Cytoplasmic	Cytoplasmic			0.38355	0
265	CDS	R51_1	289567	287924	97.8475	-1	-	1644	Methyl-accepting chemotaxis protein I (serine chemoreceptor protein)	Bacterial Chemotaxis		locus|R51_00267		IM (inner membrane)	C:plasma membrane	InnerMembrane	CytoplasmicMembrane			0.542505	2
266	CDS	R51_1	291965	289767	90.9091	-2	-	2199	Lead, cadmium, zinc and mercury transporting ATPase (EC 3.6.3.3) (EC 3.6.3.5); Copper-translocating P-type ATPase (EC 3.6.3.4)	Copper Transport System; <br>Copper homeostasis		locus|R51_00268		IM (inner membrane)	C:plasma membrane	InnerMembrane	CytoplasmicMembrane			0.414483	5
267	CDS	R51_1	292672	292046	32.0586	-1	-	627	probable enzyme yhhN	- none -		locus|R51_00269		IM (inner membrane)	C:plasma membrane	InnerMembrane	CytoplasmicMembrane			0.39032	6
268	CDS	R51_1	292814	293185	50.4465	2	+	372	Putative receptor	- none -		locus|R51_00270		IM (inner membrane)	C:plasma membrane	Periplasmic	Unknown			0.272525	1
269	CDS	R51_1	293476	293207	21.5709	-1	-	270	Putative inner membrane protein	- none -		locus|R51_00271		IM (inner membrane)	C:plasma membrane	InnerMembrane	CytoplasmicMembrane			0.340707	2
270	CDS	R51_1	294062	293466	85.8255	-2	-	597	16S rRNA (guanine(966)-N(2))-methyltransferase (EC 2.1.1.171)	CBSS-266117.6.peg.1260; <br>CBSS-269801.1.peg.1715; <br>RNA methylation		locus|R51_00272		unknown	C:cytoplasm	Cytoplasmic	Unknown			0.450621	0
271	CDS	R51_1	294188	295663	95.1225	2	+	1476	Signal recognition particle receptor protein FtsY (=alpha subunit) (TC 3.A.5.1.1)	Bacterial Cell Division; <br>Bacterial signal recognition particle (SRP); <br>Universal GTPases		locus|R51_00273		C (cytoplasmic)	C:cytoplasm	Cytoplasmic	Cytoplasmic			0.382467	0
272	CDS	R51_1	295666	296334	83.3753	1	+	669	Cell division transporter, ATP-binding protein FtsE (TC 3.A.5.1.1)	Bacterial Cell Division		locus|R51_00274		C (cytoplasmic)	C:cytoplasm	Cytoplasmic	CytoplasmicMembrane			0.6566	0
273	CDS	R51_1	296327	297382	90.8862	2	+	1056	Cell division protein FtsX	Bacterial Cell Division		locus|R51_00275		IM (inner membrane)	C:plasma membrane	InnerMembrane	CytoplasmicMembrane			0.260593	4
274	CDS	R51_1	297628	298482	90.9091	1	+	855	RNA polymerase sigma factor RpoH	Heat shock dnaK gene cluster extended; <br>Transcription initiation, bacterial sigma factors		locus|R51_00276		unknown	C:cytoplasm	Cytoplasmic	Cytoplasmic			0.499591	0
275	CDS	R51_1	298810	299907	95.3286	1	+	1098	High-affinity leucine-specific transport system, periplasmic binding protein LivK (TC 3.A.1.4.1)	ABC transporter branched-chain amino acid (TC 3.A.1.4.1)		locus|R51_00277		P (Periplasm)	C:extracellular space	Periplasmic	Periplasmic	SP		0.471004	0
276	CDS	R51_1	300486	300103	42.7525	-3	-	384	probable acetyltransferase YPO3809	- none -		locus|R51_00278		C (cytoplasmic)	C:cytoplasm	Cytoplasmic	Unknown			0.406985	0
277	CDS	R51_1	300907	302016	95.9698	1	+	1110	High-affinity leucine-specific transport system, periplasmic binding protein LivK (TC 3.A.1.4.1)	ABC transporter branched-chain amino acid (TC 3.A.1.4.1)		locus|R51_00279		P (Periplasm)	C:extracellular space	Periplasmic	Periplasmic	SP		0.449452	0
278	CDS	R51_1	302076	303002	84.818	3	+	927	High-affinity branched-chain amino acid transport system permease protein LivH (TC 3.A.1.4.1)	ABC transporter branched-chain amino acid (TC 3.A.1.4.1)		locus|R51_00280		IM (inner membrane)	C:plasma membrane	InnerMembrane	CytoplasmicMembrane			0.354145	8
279	CDS	R51_1	302999	304276	90.245	2	+	1278	Branched-chain amino acid transport system permease protein LivM (TC 3.A.1.4.1)	ABC transporter branched-chain amino acid (TC 3.A.1.4.1)		locus|R51_00281		IM (inner membrane)	C:plasma membrane	InnerMembrane	CytoplasmicMembrane			0.249551	10
280	CDS	R51_1	304273	305040	83.3066	1	+	768	Branched-chain amino acid transport ATP-binding protein LivG (TC 3.A.1.4.1)	ABC transporter branched-chain amino acid (TC 3.A.1.4.1)		locus|R51_00282		unknown	C:cytoplasm	InnerMembrane	Cytoplasmic			0.370326	0
281	CDS	R51_1	305042	305755	87.3368	2	+	714	Branched-chain amino acid transport ATP-binding protein LivF (TC 3.A.1.4.1)	ABC transporter branched-chain amino acid (TC 3.A.1.4.1)		locus|R51_00283		C (cytoplasmic)	C:cytoplasm	Cytoplasmic	CytoplasmicMembrane			0.779065	0
282	CDS	R51_1	305886	306107	9.3886	3	+	222	RelB/StbD replicon stabilization protein (antitoxin to RelE/StbE)	Toxin-antitoxin replicon stabilization systems		locus|R51_00284		C (cytoplasmic)	C:cytoplasm	Cytoplasmic	Unknown			0.455292	0
283	CDS	R51_1	306104	306472	2.90817	2	+	369	Death on curing protein, Doc toxin	Phd-Doc, YdcE-YdcD toxin-antitoxin (programmed cell death) systems		locus|R51_00285		C (cytoplasmic)	C:cytoplasm	InnerMembrane	Unknown			0.368716	0
284	CDS	R51_1	306731	308047	97.7788	2	+	1317	Glycerol-3-phosphate ABC transporter, periplasmic glycerol-3-phosphate-binding protein (TC 3.A.1.1.3)	Glycerol and Glycerol-3-phosphate Uptake and Utilization		locus|R51_00286		P (Periplasm)	C:extracellular space	Periplasmic	Periplasmic	SP		0.387972	1
285	CDS	R51_1	308152	309039	71.422	1	+	888	Glycerol-3-phosphate ABC transporter, permease protein UgpA (TC 3.A.1.1.3)	Glycerol and Glycerol-3-phosphate Uptake and Utilization		locus|R51_00287		IM (inner membrane)	C:plasma membrane	InnerMembrane	CytoplasmicMembrane			0.304888	6
286	CDS	R51_1	309036	309881	75.2233	3	+	846	Glycerol-3-phosphate ABC transporter, permease protein UgpE (TC 3.A.1.1.3)	Glycerol and Glycerol-3-phosphate Uptake and Utilization		locus|R51_00288		IM (inner membrane)	C:plasma membrane	InnerMembrane	CytoplasmicMembrane			0.856933	6
287	CDS	R51_1	309883	310953	90.7717	1	+	1071	Glycerol-3-phosphate ABC transporter, ATP-binding protein UgpC (TC 3.A.1.1.3)	Glycerol and Glycerol-3-phosphate Uptake and Utilization		locus|R51_00289		C (cytoplasmic)	C:cytoplasm	Cytoplasmic	CytoplasmicMembrane			0.712178	0
288	CDS	R51_1	310950	311690	88.5276	3	+	741	Glycerophosphoryl diester phosphodiesterase (EC 3.1.4.46)	CBSS-176299.4.peg.1996A; <br>Glycerol and Glycerol-3-phosphate Uptake and Utilization		locus|R51_00290		C (cytoplasmic)	C:cytoplasm	Cytoplasmic	Cytoplasmic			0.313124	0
1073	CDS	R51_1	1131247	1132254	96.6109	1	+	1008	Fimbriae-like adhesin SfmH	The fimbrial Sfm cluster		locus|R51_01100		EC (Extracellular)	C:extracellular space	Periplasmic	Unknown	SP	Probable ANTIGEN	0.632252	0	0.5406	0.978022
1210	CDS	R51_1	1287109	1287393	85.94	1	+	285	Probable secreted protein	- none -		locus|R51_01237		P (Periplasm)	C:extracellular space	Periplasmic	Unknown	SP	Probable ANTIGEN	0.625668	0	0.8194	0.994505
291	CDS	R51_1	315065	314091	90.9091	-2	-	975	Puative phophotriesterase	- none -		locus|R51_00293		C (cytoplasmic)	C:cytoplasm	Cytoplasmic	CytoplasmicMembrane			0.467977	0
292	CDS	R51_1	316033	315062	87.085	-1	-	972	Putative inner membrane protein	- none -		locus|R51_00294		IM (inner membrane)	C:plasma membrane	InnerMembrane	CytoplasmicMembrane	SP		0.248679	10
293	CDS	R51_1	316848	316087	89.8557	-3	-	762	FIG074102: hypothetical protein	- none -		locus|R51_00295		C (cytoplasmic)	C:cytoplasm	Cytoplasmic	Cytoplasmic			0.444092	0
294	CDS	R51_1	318074	316845	96.1072	-2	-	1230	Putative ribokinase	- none -		locus|R51_00296		C (cytoplasmic)	C:cytoplasm	Cytoplasmic	Cytoplasmic			0.365705	0
295	CDS	R51_1	318827	318339	73.254	-2	-	489	Putative acetyltransferase	- none -		locus|R51_00297		C (cytoplasmic)	C:cytoplasm	Cytoplasmic	Cytoplasmic			0.291535	0
296	CDS	R51_1	319294	320331	90.9091	1	+	1038	FIG00553873: hypothetical protein	- none -		locus|R51_00298		C (cytoplasmic)	C:cytoplasm	Cytoplasmic	Cytoplasmic			0.447057	0
297	CDS	R51_1	320455	321150	90.4969	1	+	696	Qercetin 2,3-dioxygenase	- none -		locus|R51_00299		C (cytoplasmic)	C:cytoplasm	Cytoplasmic	Cytoplasmic		Probable ANTIGEN	0.419751	0
298	CDS	R51_1	321520	322515	90.9091	1	+	996	Gluconate utilization system Gnt-I transcriptional repressor	D-gluconate and ketogluconates metabolism		locus|R51_00300		C (cytoplasmic)	C:cytoplasm	Cytoplasmic	Cytoplasmic			0.57472	0
299	CDS	R51_1	322654	323187	71.6052	1	+	534	Gluconokinase (EC 2.7.1.12)	D-gluconate and ketogluconates metabolism; <br>Entner-Doudoroff Pathway		locus|R51_00301		C (cytoplasmic)	C:cytoplasm	Cytoplasmic	Cytoplasmic			0.378086	0
300	CDS	R51_1	323184	324524	90.9091	3	+	1341	Low-affinity gluconate/H+ symporter GntU	D-gluconate and ketogluconates metabolism		locus|R51_00302		IM (inner membrane)	C:plasma membrane	InnerMembrane	CytoplasmicMembrane			0.361692	13
301	CDS	R51_1	324683	324363	54.4081	-2	-	321	hypothetical protein	- none -		locus|R51_00303		C (cytoplasmic)	C:outer membrane	Periplasmic	Unknown			0.30763	0
302	CDS	R51_1	324948	326054	90.9091	3	+	1107	Aspartate-semialdehyde dehydrogenase (EC 1.2.1.11)	Lysine Biosynthesis DAP Pathway; <br>Lysine Biosynthesis DAP Pathway, GJO scratch; <br>Threonine and Homoserine Biosynthesis		locus|R51_00304		C (cytoplasmic)	C:cytoplasm	Cytoplasmic	Cytoplasmic			0.302465	0
303	CDS	R51_1	326401	328317	91.0694	1	+	1917	1,4-alpha-glucan (glycogen) branching enzyme, GH-13-type (EC 2.4.1.18)	Glycogen metabolism; <br>Glycogen metabolism cluster; <br>Trehalose Biosynthesis		locus|R51_00305		IM (inner membrane)	C:cytoplasm	Cytoplasmic	Cytoplasmic			0.246013	0
304	CDS	R51_1	328287	328586	65.9721	3	+	300	1,4-alpha-glucan (glycogen) branching enzyme, GH-13-type (EC 2.4.1.18)	Glycogen metabolism; <br>Glycogen metabolism cluster; <br>Trehalose Biosynthesis		locus|R51_00306		C (cytoplasmic)	C:cytoplasm	Cytoplasmic	Cytoplasmic			0.392297	0
305	CDS	R51_1	328583	330337	90.9091	2	+	1755	Glycogen debranching enzyme (EC 3.2.1.-)	Glycogen metabolism; <br>Glycogen metabolism cluster; <br>Trehalose Biosynthesis		locus|R51_00307		EC (Extracellular)	C:cytoplasm	Cytoplasmic	Cytoplasmic			0.2896	0
306	CDS	R51_1	330574	331869	90.9091	1	+	1296	Glucose-1-phosphate adenylyltransferase (EC 2.7.7.27)	Glycogen metabolism; <br>Glycogen metabolism cluster		locus|R51_00308		C (cytoplasmic)	C:cytoplasm	Cytoplasmic	Cytoplasmic			0.313284	0
307	CDS	R51_1	331869	333302	90.9091	3	+	1434	Glycogen synthase, ADP-glucose transglucosylase (EC 2.4.1.21)	Glycogen metabolism; <br>Glycogen metabolism cluster		locus|R51_00309		unknown	C:cytoplasm	Cytoplasmic	Cytoplasmic			0.388863	0
308	CDS	R51_1	333322	335769	95.466	1	+	2448	Glycogen phosphorylase (EC 2.4.1.1)	Glycogen metabolism; <br>Glycogen metabolism cluster; <br>Maltose and Maltodextrin Utilization		locus|R51_00310		C (cytoplasmic)	C:cytoplasm	Cytoplasmic	Cytoplasmic			0.270012	0
309	CDS	R51_1	335947	336702	90.3824	1	+	756	Transcriptional regulator, ArsR family	- none -		locus|R51_00311		C (cytoplasmic)	C:cytoplasm	Cytoplasmic	Cytoplasmic			0.448715	0
310	CDS	R51_1	337651	336746	90.7717	-1	-	906	4-hydroxy-tetrahydrodipicolinate synthase (EC 4.3.3.7)	Lysine Biosynthesis DAP Pathway; <br>Lysine Biosynthesis DAP Pathway, GJO scratch		locus|R51_00312		unknown	C:cytoplasm	Cytoplasmic	Cytoplasmic			0.404561	0
311	CDS	R51_1	339410	337695	95.237	-2	-	1716	Dihydroxy-acid dehydratase (EC 4.2.1.9)	Branched-Chain Amino Acid Biosynthesis		locus|R51_00313		C (cytoplasmic)	C:cytoplasm	Cytoplasmic	Cytoplasmic			0.478554	0
312	CDS	R51_1	340741	339407	90.6114	-1	-	1335	Nitrate/nitrite transporter	Nitrate and nitrite ammonification		locus|R51_00314		IM (inner membrane)	C:plasma membrane	InnerMembrane	CytoplasmicMembrane			0.269033	12
313	CDS	R51_1	341079	342188	90.9091	3	+	1110	Glycerol dehydrogenase (EC 1.1.1.6)	Respiratory dehydrogenases 1		locus|R51_00315		C (cytoplasmic)	C:cytoplasm	Cytoplasmic	Cytoplasmic			0.393751	0
314	CDS	R51_1	342372	343835	90.9091	3	+	1464	Phosphate ABC transporter, periplasmic phosphate-binding protein PstS (TC 3.A.1.7.1)	High affinity phosphate transporter and control of PHO regulon; <br>PhoR-PhoB two-component regulatory system; <br>Phosphate metabolism		locus|R51_00316		IM (inner membrane)	C:plasma membrane	InnerMembrane	CytoplasmicMembrane			0.444773	5
315	CDS	R51_1	343845	344390	77.8567	3	+	546	Putative inner membrane protein	- none -		locus|R51_00317		C (cytoplasmic)	C:plasma membrane	Cytoplasmic	Unknown			0.35112	0
316	CDS	R51_1	345945	344437	93.8631	-3	-	1509	Aerobic glycerol-3-phosphate dehydrogenase (EC 1.1.5.3)	Glycerol and Glycerol-3-phosphate Uptake and Utilization; <br>Glycerolipid and Glycerophospholipid Metabolism in Bacteria; <br>Respiratory dehydrogenases 1		locus|R51_00318		unknown	C:cytoplasm	Cytoplasmic	Cytoplasmic			0.3506	0
317	CDS	R51_1	346144	346470	26.9292	1	+	327	Thiosulfate sulfurtransferase GlpE (EC 2.8.1.1)	Glycerol and Glycerol-3-phosphate Uptake and Utilization; <br>Single-Rhodanese-domain proteins		locus|R51_00319		C (cytoplasmic)	C:cytoplasm	Cytoplasmic	Cytoplasmic			0.36442	0
318	CDS	R51_1	346546	347376	48.5688	1	+	831	GlpG protein (membrane protein of glp regulon)	Glycerol and Glycerol-3-phosphate Uptake and Utilization		locus|R51_00320		IM (inner membrane)	C:plasma membrane	InnerMembrane	CytoplasmicMembrane			0.280818	6
319	CDS	R51_1	347470	348228	89.7183	1	+	759	Glycerol-3-phosphate regulon repressor, DeoR family	- none -		locus|R51_00321		C (cytoplasmic)	C:cytoplasm	Cytoplasmic	Cytoplasmic			0.37392	0
320	CDS	R51_1	348545	348225	72.0403	-2	-	321	Transcriptional regulatory protein RtcR	RNA 3&#39;-terminal phosphate cyclase		locus|R51_00322		C (cytoplasmic)	C:cytoplasm	Cytoplasmic	Unknown			0.32067	0
321	CDS	R51_1	349808	348618	90.9091	-2	-	1191	Transcriptional regulatory protein RtcR	RNA 3&#39;-terminal phosphate cyclase		locus|R51_00323		C (cytoplasmic)	C:cytoplasm	Cytoplasmic	Cytoplasmic			0.542382	0
322	CDS	R51_1	349998	351551	90.9091	3	+	1554	Putative ribonucleoprotein related-protein	- none -		locus|R51_00324		C (cytoplasmic)	C:cytoplasm	InnerMembrane	Unknown			0.289985	0
323	CDS	R51_1	351781	352998	91.39	1	+	1218	RNA-2&#39;,3&#39;-PO4:RNA-5&#39;-OH ligase	RNA 3&#39;-terminal phosphate cyclase; <br>tRNA modification Archaea; <br>tRNA splicing		locus|R51_00325		C (cytoplasmic)	C:cytoplasm	Cytoplasmic	Cytoplasmic			0.275192	0
324	CDS	R51_1	353002	354021	90.9091	1	+	1020	RNA 3&#39;-terminal phosphate cyclase (EC 6.5.1.4)	RNA 3&#39;-terminal phosphate cyclase; <br>tRNA splicing		locus|R51_00326		C (cytoplasmic)	C:cytoplasm	Cytoplasmic	Cytoplasmic			0.318963	0
325	CDS	R51_1	354130	354390	77.0094	1	+	261	DNA-damage-inducible protein J	DNA repair, bacterial; <br>Toxin-antitoxin replicon stabilization systems		locus|R51_00327		C (cytoplasmic)	C:cytoplasm	Cytoplasmic	Cytoplasmic			0.319156	0
326	CDS	R51_1	354393	354668	30.4786	3	+	276	YafQ toxin protein	Toxin-antitoxin replicon stabilization systems		locus|R51_00328		C (cytoplasmic)	C:cytoplasm	Cytoplasmic	Unknown			0.245031	0
327	CDS	R51_1	357461	354756	90.9091	-2	-	2706	Transcriptional activator of maltose regulon, MalT	Maltose and Maltodextrin Utilization; <br>Maltose utilization cluster		locus|R51_00329		C (cytoplasmic)	C:cytoplasm	Cytoplasmic	CytoplasmicMembrane			0.452524	0
328	CDS	R51_1	358055	360448	95.1454	2	+	2394	Maltodextrin phosphorylase (EC 2.4.1.1)	Glycogen metabolism; <br>Maltose and Maltodextrin Utilization; <br>Maltose utilization cluster		locus|R51_00330		C (cytoplasmic)	C:cytoplasm	Cytoplasmic	Cytoplasmic			0.393288	0
329	CDS	R51_1	360458	362536	95.3286	2	+	2079	4-alpha-glucanotransferase (amylomaltase) (EC 2.4.1.25)	Glycogen metabolism; <br>Glycogen metabolism cluster; <br>Maltose and Maltodextrin Utilization; <br>Maltose utilization cluster		locus|R51_00331		C (cytoplasmic)	C:cytoplasm	Cytoplasmic	Cytoplasmic			0.565548	0
330	CDS	R51_1	363971	362655	90.9091	-2	-	1317	High-affinity gluconate transporter GntT	D-gluconate and ketogluconates metabolism		locus|R51_00332		IM (inner membrane)	C:plasma membrane	InnerMembrane	CytoplasmicMembrane			0.500671	11
331	CDS	R51_1	364923	364348	90.6343	-3	-	576	NfuA Fe-S protein maturation	Biotin biosynthesis Experimental		locus|R51_00333		C (cytoplasmic)	C:cytoplasm	Cytoplasmic	Cytoplasmic			0.262668	0
332	CDS	R51_1	365665	364982	78.2917	-1	-	684	Competence protein F homolog, phosphoribosyltransferase domain; protein YhgH required for utilization of DNA as sole source of carbon and energy	Biotin biosynthesis Experimental; <br>Biotin synthesis cluster; <br>CBSS-216591.1.peg.168		locus|R51_00334		P (Periplasm)	C:cytoplasm	Cytoplasmic	Cytoplasmic			0.328922	0
333	CDS	R51_1	365703	366473	90.245	3	+	771	Biotin synthesis protein BioH	Biotin biosynthesis; <br>Biotin biosynthesis Experimental; <br>Biotin synthesis cluster		locus|R51_00335		unknown	C:cytoplasm	Cytoplasmic	Cytoplasmic			0.348787	0
334	CDS	R51_1	367435	366509	86.9018	-1	-	927	Uncharacterized protein YfaD	- none -		locus|R51_00336		C (cytoplasmic)	C:cytoplasm	Cytoplasmic	Cytoplasmic			0.274048	0
335	CDS	R51_1	367906	367670	37.2567	-1	-	237	Ferrous iron-sensisng transcriptional regulator FeoC	- none -		locus|R51_00337		C (cytoplasmic)	C:cytoplasm	Cytoplasmic	Unknown			0.266507	0
336	CDS	R51_1	370237	367919	90.9091	-1	-	2319	Ferrous iron transport protein B	- none -		locus|R51_00338		IM (inner membrane)	C:plasma membrane	InnerMembrane	CytoplasmicMembrane			0.362005	10
337	CDS	R51_1	370483	370256	22.0518	-1	-	228	Ferrous iron transport protein A	- none -		locus|R51_00339		C (cytoplasmic)	C:cytoplasm	Cytoplasmic	Unknown			0.27223	0
338	CDS	R51_1	373250	370920	97.4124	-2	-	2331	Transcription accessory protein (S1 RNA-binding domain)	CBSS-243265.1.peg.198; <br>Cell division-ribosomal stress proteins cluster; <br>Transcription factors bacterial		locus|R51_00340		C (cytoplasmic)	C:cytoplasm	Cytoplasmic	Cytoplasmic			0.337388	0
339	CDS	R51_1	373822	373349	90.2679	-1	-	474	Transcription elongation factor GreB	CBSS-243265.1.peg.198; <br>Transcription factors bacterial		locus|R51_00341		C (cytoplasmic)	C:cytoplasm	Cytoplasmic	Cytoplasmic			0.528371	0
340	CDS	R51_1	374048	374767	86.6499	2	+	720	Two-component system response regulator OmpR	- none -		locus|R51_00342		C (cytoplasmic)	C:cytoplasm	Cytoplasmic	Cytoplasmic			0.452916	0
341	CDS	R51_1	374764	376116	90.9091	1	+	1353	Osmolarity sensory histidine kinase EnvZ	- none -		locus|R51_00343		IM (inner membrane)	C:plasma membrane	InnerMembrane	CytoplasmicMembrane			0.394137	2
342	CDS	R51_1	377810	376191	97.0231	-2	-	1620	Phosphoenolpyruvate carboxykinase [ATP] (EC 4.1.1.49)	CBSS-584.1.peg.3382; <br>Pyruvate metabolism I: anaplerotic reactions, PEP; <br>Serine-glyoxylate cycle		locus|R51_00344		C (cytoplasmic)	C:cytoplasm	Cytoplasmic	Cytoplasmic			0.316848	0
343	CDS	R51_1	378190	379899	90.9091	1	+	1710	Putative transport protein	- none -		locus|R51_00345		IM (inner membrane)	C:plasma membrane	InnerMembrane	CytoplasmicMembrane			0.427562	11
344	CDS	R51_1	380886	380008	89.9702	-3	-	879	33 kDa chaperonin (Heat shock protein 33) (HSP33)	CBSS-584.1.peg.3382		locus|R51_00346		C (cytoplasmic)	C:cytoplasm	Cytoplasmic	Cytoplasmic			0.326617	0
345	CDS	R51_1	381312	380911	80.5129	-3	-	402	Ribosome-associated heat shock protein implicated in the recycling of the 50S subunit (S4 paralog)	CBSS-584.1.peg.3382; <br>Cell division-ribosomal stress proteins cluster; <br>DNA replication cluster 1; <br>Heat shock dnaK gene cluster extended		locus|R51_00347		C (cytoplasmic)	C:cytoplasm	Cytoplasmic	Cytoplasmic			0.256248	0
346	CDS	R51_1	381991	381323	87.4513	-1	-	669	FIG001957: putative hydrolase	CBSS-584.1.peg.3382		locus|R51_00348		C (cytoplasmic)	C:cytoplasm	Cytoplasmic	Cytoplasmic			0.422765	0
347	CDS	R51_1	384188	382056	90.9091	-2	-	2133	IgaA: a membrane protein that prevents overactivation of the Rcs regulatory system	CBSS-584.1.peg.3382		locus|R51_00349		IM (inner membrane)	C:plasma membrane	InnerMembrane	CytoplasmicMembrane	SP		0.33697	5
348	CDS	R51_1	384478	385074	88.4589	1	+	597	ADP compounds hydrolase NudE (EC 3.6.1.-)	Nudix proteins (nucleoside triphosphate hydrolases)		locus|R51_00350		C (cytoplasmic)	C:cytoplasm	Cytoplasmic	Cytoplasmic			0.644086	0
349	CDS	R51_1	387722	385170	95.7637	-2	-	2553	Multimodular transpeptidase-transglycosylase (EC 2.4.1.129) (EC 3.4.-.-)	Peptidoglycan Biosynthesis; <br>Type IV pilus		locus|R51_00351		IM (inner membrane)	C:plasma membrane	Periplasmic	CytoplasmicMembrane			0.448111	1
350	CDS	R51_1	387843	388622	79.5741	3	+	780	Type IV pilus biogenesis protein PilM	Type IV pilus		locus|R51_00352		P (Periplasm)	C:cytoplasm	Cytoplasmic	Unknown			0.455686	0
351	CDS	R51_1	388622	389161	85.8713	2	+	540	Type IV pilus biogenesis protein PilN	Type IV pilus		locus|R51_00353		IM (inner membrane)	C:cytoplasm	Periplasmic	CytoplasmicMembrane			0.33313	1
352	CDS	R51_1	389145	389618	32.6769	3	+	474	Type IV pilus biogenesis protein PilO	Type IV pilus		locus|R51_00354		IM (inner membrane)	C:cytoplasm	Periplasmic	Unknown			0.355306	1
1230	CDS	R51_1	1309829	1308750	98.6719	-2	-	1080	Putative fimbriae	- none -		locus|R51_01257		OM (Outer Membrane)	C:extracellular space	Extracellular	Extracellular	SP	Probable ANTIGEN	0.847729	0	0.6675	0.983516
354	CDS	R51_1	389960	391162	90.932	2	+	1203	Type IV pilus biogenesis protein PilQ	Type IV pilus		locus|R51_00356		C (cytoplasmic)	C:cytoplasm	OuterMembrane	OuterMembrane			0.564058	0
355	CDS	R51_1	391627	392148	89.7412	1	+	522	Shikimate kinase I (EC 2.7.1.71)	Chorismate Synthesis; <br>Common Pathway For Synthesis of Aromatic Compounds (DAHP synthase to chorismate); <br>Shikimate kinase containing cluster		locus|R51_00357		C (cytoplasmic)	C:cytoplasm	Cytoplasmic	Cytoplasmic			0.355536	0
356	CDS	R51_1	392205	393293	90.9091	3	+	1089	3-dehydroquinate synthase (EC 4.2.3.4)	Chorismate Synthesis; <br>Common Pathway For Synthesis of Aromatic Compounds (DAHP synthase to chorismate); <br>Shikimate kinase containing cluster; <br>Type IV pilus		locus|R51_00358		C (cytoplasmic)	C:cytoplasm	Cytoplasmic	Cytoplasmic			0.313296	0
357	CDS	R51_1	393391	394668	91.6648	1	+	1278	DamX, an inner membrane protein involved in bile resistance	Bile hydrolysis; <br>Shikimate kinase containing cluster		locus|R51_00359		IM (inner membrane)	C:cytoplasm	Extracellular	Unknown		Probable ANTIGEN	0.267438	1
358	CDS	R51_1	394850	395686	90.9091	2	+	837	Methyl-directed repair DNA adenine methylase (EC 2.1.1.72)	DNA repair, bacterial; <br>Shikimate kinase containing cluster		locus|R51_00360		C (cytoplasmic)	C:cytoplasm	Cytoplasmic	Unknown			0.394542	0
359	CDS	R51_1	395704	396381	90.9091	1	+	678	Ribulose-phosphate 3-epimerase (EC 5.1.3.1)	Conserved gene cluster associated with Met-tRNA formyltransferase; <br>Pentose phosphate pathway; <br>Riboflavin synthesis cluster		locus|R51_00361		unknown	C:cytoplasm	Cytoplasmic	Cytoplasmic			0.736366	0
360	CDS	R51_1	396374	397132	90.9091	2	+	759	Phosphoglycolate phosphatase (EC 3.1.3.18)	2-phosphoglycolate salvage; <br>Glycolate, glyoxylate interconversions		locus|R51_00362		C (cytoplasmic)	C:cytoplasm	Cytoplasmic	Cytoplasmic			0.801846	0
361	CDS	R51_1	397125	398129	91.3442	3	+	1005	Tryptophanyl-tRNA synthetase (EC 6.1.1.2)	tRNA aminoacylation, Trp		locus|R51_00363		C (cytoplasmic)	C:cytoplasm	Cytoplasmic	Cytoplasmic			0.359403	0
1232	CDS	R51_1	1312396	1310774	97.7559	-1	-	1623	FIG100795: Fimbriae usher protein StiC	- none -		locus|R51_01259		OM (Outer Membrane)	C:extracellular space	OuterMembrane	OuterMembrane	SP	Probable ANTIGEN	0.58572	1	0.4369
1361	CDS	R51_1	1451521	1450802	92.4433	-1	-	720	Peptide transport periplasmic protein sapA (TC 3.A.1.5.5)	- none -		locus|R51_01394		OM (Outer Membrane)	C:extracellular space	Extracellular	Unknown	SP	Probable ANTIGEN	0.503962	0	0.5394	0.994505
364	CDS	R51_1	406119	404746	90.9091	-3	-	1374	Siroheme synthase / Precorrin-2 oxidase (EC 1.3.1.76) / Sirohydrochlorin ferrochelatase (EC 4.99.1.4) / Uroporphyrinogen-III methyltransferase (EC 2.1.1.107)	Coenzyme B12 biosynthesis; <br>Heme and Siroheme Biosynthesis; <br>Heme and Siroheme Biosynthesis; <br>Heme and Siroheme Biosynthesis		locus|R51_00366		C (cytoplasmic)	C:cytoplasm	Cytoplasmic	Cytoplasmic			0.270887	0
365	CDS	R51_1	406940	406131	88.8711	-2	-	810	Nitrite transporter NirC	Nitrate and nitrite ammonification		locus|R51_00367		IM (inner membrane)	C:plasma membrane	InnerMembrane	CytoplasmicMembrane			0.602244	6
366	CDS	R51_1	407462	407136	83.1921	-2	-	327	Nitrite reductase [NAD(P)H] small subunit (EC 1.7.1.4)	Nitrate and nitrite ammonification		locus|R51_00368		C (cytoplasmic)	C:cytoplasm	Cytoplasmic	Cytoplasmic			0.833384	0
367	CDS	R51_1	410002	407459	95.9469	-1	-	2544	Nitrite reductase [NAD(P)H] large subunit (EC 1.7.1.4)	Nitrate and nitrite ammonification		locus|R51_00369		C (cytoplasmic)	C:cytoplasm	Cytoplasmic	Cytoplasmic			0.403625	0
368	CDS	R51_1	411446	410265	77.9482	-2	-	1182	TsgA protein homolog	Uptake of selenate and selenite		locus|R51_00370		IM (inner membrane)	C:plasma membrane	InnerMembrane	CytoplasmicMembrane			0.327378	12
369	CDS	R51_1	411723	412295	90.9091	3	+	573	Peptidyl-prolyl cis-trans isomerase PpiA precursor (EC 5.2.1.8)	Peptidyl-prolyl cis-trans isomerase		locus|R51_00371		P (Periplasm)	C:extracellular space	Periplasmic	Periplasmic	SP		0.369795	0
370	CDS	R51_1	412299	412571	10.2817	3	+	273	FIG00639558: hypothetical protein	- none -		locus|R51_00372		C (cytoplasmic)	C:outer membrane	Cytoplasmic	Unknown			0.494564	0
371	CDS	R51_1	412561	413163	72.2235	1	+	603	Cell filamentation protein fic	- none -		locus|R51_00373		C (cytoplasmic)	C:cytoplasm	Cytoplasmic	Cytoplasmic			0.417928	0
372	CDS	R51_1	413195	413758	86.2606	2	+	564	Para-aminobenzoate synthase, amidotransferase component (EC 2.6.1.85)	Chorismate: Intermediate for synthesis of Tryptophan, PAPA antibiotics, PABA, 3-hydroxyanthranilate and more.; <br>Folate Biosynthesis; <br>Tryptophan synthesis		locus|R51_00374		unknown	C:cytoplasm	Cytoplasmic	Cytoplasmic			0.365564	0
373	CDS	R51_1	413844	415061	90.9091	3	+	1218	Acetylornithine aminotransferase (EC 2.6.1.11) / N-succinyl-L,L-diaminopimelate aminotransferase (EC 2.6.1.17)	Arginine Biosynthesis -- gjo; <br>Arginine Biosynthesis extended; <br>Lysine Biosynthesis DAP Pathway; <br>Lysine Biosynthesis DAP Pathway, GJO scratch		locus|R51_00375		C (cytoplasmic)	C:cytoplasm	Cytoplasmic	Cytoplasmic			0.363414	0
374	CDS	R51_1	417047	415104	90.9091	-2	-	1944	FIG00638035: hypothetical protein	- none -		locus|R51_00376		IM (inner membrane)	C:plasma membrane	InnerMembrane	CytoplasmicMembrane			0.402313	8
375	CDS	R51_1	417728	417096	90.7717	-2	-	633	Cyclic AMP receptor protein	CytR regulation; <br>cAMP signaling in bacteria		locus|R51_00377		C (cytoplasmic)	C:cytoplasm	Cytoplasmic	Cytoplasmic			0.383936	0
376	CDS	R51_1	418036	418440	52.5074	1	+	405	OsmC/Ohr family protein	- none -		locus|R51_00378		C (cytoplasmic)	C:cytoplasm	Cytoplasmic	Unknown			0.256437	0
377	CDS	R51_1	419405	418536	90.5885	-2	-	870	Phosphoribulokinase (EC 2.7.1.19) homolog, function unknown	- none -		locus|R51_00379		C (cytoplasmic)	C:cytoplasm	Cytoplasmic	Cytoplasmic			0.563432	0
378	CDS	R51_1	419674	419456	58.0261	-1	-	219	FIG01199774: hypothetical protein	- none -		locus|R51_00380		C (cytoplasmic)	C:cytoplasm	Cytoplasmic	Unknown			0.479262	0
379	CDS	R51_1	420693	419671	90.6572	-3	-	1023	Hydrolase, alpha/beta fold family functionally coupled to Phosphoribulokinase	cAMP signaling in bacteria		locus|R51_00381		C (cytoplasmic)	C:cytoplasm	Cytoplasmic	Cytoplasmic			0.380557	0
380	CDS	R51_1	420936	421247	78.8413	3	+	312	FIG01045846: hypothetical protein	- none -		locus|R51_00382		C (cytoplasmic)	C:cytoplasm	Cytoplasmic	Unknown			0.428098	0
381	CDS	R51_1	421470	421249	39.5695	-3	-	222	FIG01045308: hypothetical protein	- none -		locus|R51_00383		C (cytoplasmic)	C:cytoplasm	Cytoplasmic	Unknown			0.374753	0
382	CDS	R51_1	423540	421633	93.1303	-3	-	1908	Glutathione-regulated potassium-efflux system ATP-binding protein	Glutathione-regulated potassium-efflux system and associated functions; <br>Potassium homeostasis		locus|R51_00384		C (cytoplasmic)	C:cytoplasm	Cytoplasmic	Cytoplasmic			0.342851	0
383	CDS	R51_1	423806	424357	42.6151	2	+	552	Glutathione-regulated potassium-efflux system ancillary protein KefG	Glutathione-regulated potassium-efflux system and associated functions; <br>Potassium homeostasis		locus|R51_00385		C (cytoplasmic)	C:cytoplasm	Cytoplasmic	Cytoplasmic			0.310135	0
384	CDS	R51_1	424357	425322	73.7806	1	+	966	Glutathione-regulated potassium-efflux system protein KefB	Glutathione-regulated potassium-efflux system and associated functions		locus|R51_00386		IM (inner membrane)	C:plasma membrane	InnerMembrane	CytoplasmicMembrane			0.422735	9
385	CDS	R51_1	425327	426163	71.4907	2	+	837	Glutathione-regulated potassium-efflux system protein KefB	Glutathione-regulated potassium-efflux system and associated functions		locus|R51_00387		C (cytoplasmic)	C:plasma membrane	Cytoplasmic	CytoplasmicMembrane			0.440614	0
386	CDS	R51_1	426173	426373	13.6249	2	+	201	Putative cytoplasmic protein ,probably associated with Glutathione-regulated potassium-efflux	Potassium homeostasis		locus|R51_00388		C (cytoplasmic)	C:cytoplasm	Cytoplasmic	Unknown			0.743012	0
387	CDS	R51_1	426468	427058	90.9091	3	+	591	FKBP-type peptidyl-prolyl cis-trans isomerase SlyD (EC 5.2.1.8)	G3E family of P-loop GTPases (metallocenter biosynthesis); <br>Peptidyl-prolyl cis-trans isomerase; <br>Potassium homeostasis		locus|R51_00389		C (cytoplasmic)	C:cytoplasm	Cytoplasmic	Cytoplasmic			0.270361	0
388	CDS	R51_1	427465	427247	1.25945	-1	-	219	Protein SlyX	- none -		locus|R51_00390		unknown	C:cytoplasm	Cytoplasmic	Unknown			0.567255	0
389	CDS	R51_1	427685	428503	95.7408	2	+	819	FKBP-type peptidyl-prolyl cis-trans isomerase FkpA precursor (EC 5.2.1.8)	Peptidyl-prolyl cis-trans isomerase; <br>Potassium homeostasis		locus|R51_00391		P (Periplasm)	C:extracellular space	Periplasmic	Periplasmic	SP		0.348095	0
390	CDS	R51_1	428779	429501	90.4282	1	+	723	YheO-like PAS domain	- none -		locus|R51_00392		C (cytoplasmic)	C:cytoplasm	Cytoplasmic	Cytoplasmic			0.662775	0
391	CDS	R51_1	429501	429887	70.1626	3	+	387	tRNA 5-methylaminomethyl-2-thiouridine synthase TusD	CBSS-326442.4.peg.1852; <br>Sulfite reduction-associated complex DsrMKJOP and co-clustering genes; <br>mnm5U34 biosynthesis bacteria; <br>tRNA modification Bacteria		locus|R51_00393		C (cytoplasmic)	C:cytoplasm	Cytoplasmic	Cytoplasmic			0.296673	0
392	CDS	R51_1	429887	430243	46.3476	2	+	357	tRNA 5-methylaminomethyl-2-thiouridine synthase TusC	CBSS-326442.4.peg.1852; <br>Sulfite reduction-associated complex DsrMKJOP and co-clustering genes; <br>mnm5U34 biosynthesis bacteria; <br>tRNA modification Bacteria		locus|R51_00394		C (cytoplasmic)	C:cytoplasm	Cytoplasmic	Unknown			0.28245	0
393	CDS	R51_1	430251	430538	57.9803	3	+	288	tRNA 5-methylaminomethyl-2-thiouridine synthase TusB	Sulfite reduction-associated complex DsrMKJOP and co-clustering genes; <br>mnm5U34 biosynthesis bacteria; <br>tRNA modification Bacteria		locus|R51_00395		C (cytoplasmic)	C:cytoplasm	Cytoplasmic	Unknown			0.304714	0
394	CDS	R51_1	430664	431038	87.6116	2	+	375	SSU ribosomal protein S12p (S23e)	Mycobacterium virulence operon involved in protein synthesis (SSU ribosomal proteins); <br>Ribosomal protein S12p Asp methylthiotransferase; <br>Ribosome SSU bacterial		locus|R51_00396		unknown	C:cytoplasm	Cytoplasmic	Cytoplasmic			0.276371	0
395	CDS	R51_1	431134	431604	82.2075	1	+	471	SSU ribosomal protein S7p (S5e)	Mycobacterium virulence operon involved in protein synthesis (SSU ribosomal proteins); <br>Ribosome SSU bacterial		locus|R51_00397		C (cytoplasmic)	C:cytoplasm	Cytoplasmic	Cytoplasmic		Probable ANTIGEN	0.43976	0
396	CDS	R51_1	431701	433815	98.0307	1	+	2115	Translation elongation factor G	Mycobacterium virulence operon involved in protein synthesis (SSU ribosomal proteins); <br>Translation elongation factor G family; <br>Translation elongation factors bacterial; <br>Universal GTPases		locus|R51_00398		C (cytoplasmic)	C:cytoplasm	Cytoplasmic	Cytoplasmic			0.33164	0
397	CDS	R51_1	433887	435071	91.8022	3	+	1185	Translation elongation factor Tu	Mycobacterium virulence operon involved in protein synthesis (SSU ribosomal proteins); <br>Translation elongation factors bacterial; <br>Universal GTPases		locus|R51_00399		C (cytoplasmic)	C:cytoplasm	Cytoplasmic	Cytoplasmic			0.572143	0
398	CDS	R51_1	435256	435450	74.4447	1	+	195	Bacterioferritin-associated ferredoxin	- none -		locus|R51_00400		C (cytoplasmic)	C:cytoplasm	Cytoplasmic	Cytoplasmic			0.273737	0
399	CDS	R51_1	435523	435999	90.2679	1	+	477	Bacterioferritin	- none -		locus|R51_00401		C (cytoplasmic)	C:plasma membrane	Cytoplasmic	Cytoplasmic			0.607468	0
400	CDS	R51_1	436463	435996	76.0934	-2	-	468	Leader peptidase (Prepilin peptidase) (EC 3.4.23.43) / N-methyltransferase (EC 2.1.1.-)	Type IV pilus; <br>Type IV pilus		locus|R51_00402		IM (inner membrane)	C:plasma membrane	InnerMembrane	CytoplasmicMembrane			0.498288	4
401	CDS	R51_1	436843	437154	83.8562	1	+	312	SSU ribosomal protein S10p (S20e)	Ribosome SSU bacterial		locus|R51_00403		C (cytoplasmic)	C:cytoplasm	Cytoplasmic	Cytoplasmic			0.31776	0
402	CDS	R51_1	437187	437816	90.9091	3	+	630	LSU ribosomal protein L3p (L3e)	Ribosome LSU bacterial		locus|R51_00404		unknown	C:cytoplasm	Cytoplasmic	Cytoplasmic			0.255561	0
403	CDS	R51_1	437827	438432	85.9629	1	+	606	LSU ribosomal protein L4p (L1e)	Ribosome LSU bacterial		locus|R51_00405		C (cytoplasmic)	C:cytoplasm	Cytoplasmic	Cytoplasmic			0.24272	0
404	CDS	R51_1	438429	438731	56.7667	3	+	303	LSU ribosomal protein L23p (L23Ae)	Ribosome LSU bacterial		locus|R51_00406		C (cytoplasmic)	C:cytoplasm	Cytoplasmic	Cytoplasmic			0.244449	0
405	CDS	R51_1	438749	439570	90.9091	2	+	822	LSU ribosomal protein L2p (L8e)	Ribosome LSU bacterial		locus|R51_00407		C (cytoplasmic)	C:cytoplasm	Periplasmic	Cytoplasmic		Probable ANTIGEN	0.256674	0	0.8509
406	CDS	R51_1	439587	439865	45.5003	3	+	279	SSU ribosomal protein S19p (S15e)	Ribosome SSU bacterial		locus|R51_00408		C (cytoplasmic)	C:cytoplasm	Cytoplasmic	Cytoplasmic			0.318336	0
407	CDS	R51_1	439880	440212	78.4291	2	+	333	LSU ribosomal protein L22p (L17e)	Ribosome LSU bacterial		locus|R51_00409		C (cytoplasmic)	C:cytoplasm	Cytoplasmic	Cytoplasmic			0.276679	0
408	CDS	R51_1	440230	440931	90.6343	1	+	702	SSU ribosomal protein S3p (S3e)	Ribosome SSU bacterial		locus|R51_00410		unknown	C:cytoplasm	Cytoplasmic	Cytoplasmic			0.227201	0
409	CDS	R51_1	440944	441354	86.3064	1	+	411	LSU ribosomal protein L16p (L10e)	Ribosome LSU bacterial		locus|R51_00411		unknown	C:cytoplasm	Cytoplasmic	Cytoplasmic			0.301564	0
410	CDS	R51_1	441354	441545	63.5677	3	+	192	LSU ribosomal protein L29p (L35e)	Ribosome LSU bacterial		locus|R51_00412		C (cytoplasmic)	C:cytoplasm	Cytoplasmic	Cytoplasmic			0.293571	0
411	CDS	R51_1	441545	441799	73.8035	2	+	255	SSU ribosomal protein S17p (S11e)	Ribosome SSU bacterial		locus|R51_00413		C (cytoplasmic)	C:cytoplasm	Cytoplasmic	Cytoplasmic			0.26329	0
412	CDS	R51_1	441963	442334	73.3455	3	+	372	LSU ribosomal protein L14p (L23e)	Ribosome LSU bacterial		locus|R51_00414		C (cytoplasmic)	C:cytoplasm	Cytoplasmic	Cytoplasmic			0.369897	0
413	CDS	R51_1	442345	442659	69.1779	1	+	315	LSU ribosomal protein L24p (L26e)	Ribosome LSU bacterial		locus|R51_00415		C (cytoplasmic)	C:cytoplasm	Cytoplasmic	Cytoplasmic			0.319007	0
414	CDS	R51_1	442674	443213	90.7946	3	+	540	LSU ribosomal protein L5p (L11e)	Ribosome LSU bacterial		locus|R51_00416		C (cytoplasmic)	C:cytoplasm	Cytoplasmic	Cytoplasmic			0.439545	0
415	CDS	R51_1	443228	443533	64.9645	2	+	306	SSU ribosomal protein S14p (S29e) @ SSU ribosomal protein S14p (S29e), zinc-independent	Ribosome SSU bacterial; <br>Ribosome SSU bacterial		locus|R51_00417		C (cytoplasmic)	C:cytoplasm	Cytoplasmic	Cytoplasmic			0.305216	0
416	CDS	R51_1	443567	443959	76.8949	2	+	393	SSU ribosomal protein S8p (S15Ae)	Ribosome SSU bacterial		locus|R51_00418		C (cytoplasmic)	C:cytoplasm	Cytoplasmic	Cytoplasmic			0.401756	0
417	CDS	R51_1	443972	444505	90.9091	2	+	534	LSU ribosomal protein L6p (L9e)	Ribosome LSU bacterial		locus|R51_00419		C (cytoplasmic)	C:cytoplasm	Cytoplasmic	Cytoplasmic			0.259848	0
418	CDS	R51_1	444515	444868	73.8493	2	+	354	LSU ribosomal protein L18p (L5e)	Ribosome LSU bacterial		locus|R51_00420		C (cytoplasmic)	C:cytoplasm	Cytoplasmic	Cytoplasmic			0.325948	0
419	CDS	R51_1	444883	445386	90.9091	1	+	504	SSU ribosomal protein S5p (S2e)	Ribosomal protein S5p acylation; <br>Ribosome SSU bacterial		locus|R51_00421		C (cytoplasmic)	C:cytoplasm	Cytoplasmic	Cytoplasmic			0.343141	0
420	CDS	R51_1	445390	445569	27.6849	1	+	180	LSU ribosomal protein L30p (L7e)	Ribosome LSU bacterial		locus|R51_00422		unknown	C:cytoplasm	Cytoplasmic	Cytoplasmic			0.405235	0
421	CDS	R51_1	445573	446007	90.5427	1	+	435	LSU ribosomal protein L15p (L27Ae)	Ribosome LSU bacterial		locus|R51_00423		C (cytoplasmic)	C:cytoplasm	Cytoplasmic	Cytoplasmic		Probable ANTIGEN	0.380999	0
422	CDS	R51_1	446015	447346	90.9091	2	+	1332	Preprotein translocase secY subunit (TC 3.A.5.1.1)	- none -		locus|R51_00424		IM (inner membrane)	C:plasma membrane	InnerMembrane	CytoplasmicMembrane			0.233526	10
423	CDS	R51_1	447378	447494	37.2338	3	+	117	LSU ribosomal protein L36p	Ribosome LSU bacterial		locus|R51_00425		unknown		Cytoplasmic	Cytoplasmic			0.292546	0
424	CDS	R51_1	447641	447997	76.7575	2	+	357	SSU ribosomal protein S13p (S18e)	Ribosome SSU bacterial		locus|R51_00426		C (cytoplasmic)	C:cytoplasm	Cytoplasmic	Cytoplasmic			0.220229	0
425	CDS	R51_1	448014	448403	82.2533	3	+	390	SSU ribosomal protein S11p (S14e)	Ribosome SSU bacterial		locus|R51_00427		unknown	C:cytoplasm	Cytoplasmic	Cytoplasmic		Probable ANTIGEN	0.247561	0
426	CDS	R51_1	448437	449057	90.9091	3	+	621	SSU ribosomal protein S4p (S9e)	Ribosome SSU bacterial		locus|R51_00428		C (cytoplasmic)	C:cytoplasm	Cytoplasmic	Cytoplasmic			0.310241	0
427	CDS	R51_1	449083	450072	90.9091	1	+	990	DNA-directed RNA polymerase alpha subunit (EC 2.7.7.6)	RNA polymerase bacterial		locus|R51_00429		C (cytoplasmic)	C:cytoplasm	Cytoplasmic	Cytoplasmic			0.749681	0
428	CDS	R51_1	450113	450496	81.3602	2	+	384	LSU ribosomal protein L17p	Ribosome LSU bacterial		locus|R51_00430		C (cytoplasmic)	C:cytoplasm	Cytoplasmic	Cytoplasmic			0.241001	0
429	CDS	R51_1	450604	450972	48.5688	1	+	369	FIG004614: Putative cytoplasmic protein	- none -		locus|R51_00431		C (cytoplasmic)	C:cytoplasm	Cytoplasmic	Cytoplasmic			0.274819	0
430	CDS	R51_1	450983	451468	82.2533	2	+	486	transcriptional regulator, MerR family	- none -		locus|R51_00432		C (cytoplasmic)	C:cytoplasm	Cytoplasmic	Cytoplasmic			0.406457	0
431	CDS	R51_1	451465	451734	68.1246	1	+	270	FIG01219950: hypothetical protein	- none -		locus|R51_00433		C (cytoplasmic)	C:cytoplasm	Cytoplasmic	Unknown		Probable ANTIGEN	0.46864	0
432	CDS	R51_1	452083	451670	33.7531	-1	-	414	Large-conductance mechanosensitive channel	Potassium homeostasis		locus|R51_00434		IM (inner membrane)	C:plasma membrane	InnerMembrane	CytoplasmicMembrane			0.236578	2
433	CDS	R51_1	453601	452225	90.9091	-1	-	1377	Trk system potassium uptake protein TrkA	Bacterial RNA-metabolizing Zn-dependent hydrolases; <br>Conserved gene cluster associated with Met-tRNA formyltransferase; <br>Hyperosmotic potassium uptake; <br>Potassium homeostasis; <br>Potassium homeostasis		locus|R51_00435		C (cytoplasmic)	C:cytoplasm	Cytoplasmic	CytoplasmicMembrane	SP		0.330941	0
434	CDS	R51_1	454912	453623	95.924	-1	-	1290	16S rRNA (cytosine(967)-C(5))-methyltransferase (EC 2.1.1.176) ## SSU rRNA m5C967	Conserved gene cluster associated with Met-tRNA formyltransferase; <br>RNA methylation		locus|R51_00436		C (cytoplasmic)	C:cytoplasm	Periplasmic	Unknown			0.352206	0
435	CDS	R51_1	455911	454964	90.9091	-1	-	948	Methionyl-tRNA formyltransferase (EC 2.1.2.9)	Conserved gene cluster associated with Met-tRNA formyltransferase; <br>Translation initiation factors bacterial		locus|R51_00437		C (cytoplasmic)	C:cytoplasm	Periplasmic	Cytoplasmic			0.38139	0
436	CDS	R51_1	456436	455927	88.5963	-1	-	510	Peptide deformylase (EC 3.5.1.88)	Bacterial RNA-metabolizing Zn-dependent hydrolases; <br>Conserved gene cluster associated with Met-tRNA formyltransferase; <br>Translation termination factors bacterial		locus|R51_00438		C (cytoplasmic)	C:cytoplasm	Cytoplasmic	Cytoplasmic			0.301068	0
437	CDS	R51_1	456568	457059	54.8431	1	+	492	Rossmann fold nucleotide-binding protein Smf possibly involved in DNA uptake	CBSS-272943.3.peg.1367; <br>Conserved gene cluster associated with Met-tRNA formyltransferase; <br>YrdC-YciO-Sua5 protein family		locus|R51_00439		C (cytoplasmic)	C:cytoplasm	Cytoplasmic	Cytoplasmic			0.467056	0
438	CDS	R51_1	457107	457691	78.9558	3	+	585	Rossmann fold nucleotide-binding protein Smf possibly involved in DNA uptake	CBSS-272943.3.peg.1367; <br>Conserved gene cluster associated with Met-tRNA formyltransferase; <br>YrdC-YciO-Sua5 protein family		locus|R51_00440		C (cytoplasmic)	C:cytoplasm	Cytoplasmic	Cytoplasmic			0.552482	0
439	CDS	R51_1	457663	458136	54.0188	1	+	474	Protein of unknown function Smg	Conserved gene cluster associated with Met-tRNA formyltransferase		locus|R51_00441		C (cytoplasmic)	C:cytoplasm	Cytoplasmic	Cytoplasmic			0.356166	0
440	CDS	R51_1	458163	458705	78.4291	3	+	543	Similar to C-terminal Zn-finger domain of DNA topoisomerase I	Conserved gene cluster associated with Met-tRNA formyltransferase; <br>DNA topoisomerases, Type I, ATP-independent		locus|R51_00442		C (cytoplasmic)	C:cytoplasm	Periplasmic	Cytoplasmic			0.307478	0
441	CDS	R51_1	458710	459282	68.9031	1	+	573	TsaC protein (YrdC domain) required for threonylcarbamoyladenosine t(6)A37 modification in tRNA	- none -		locus|R51_00443		C (cytoplasmic)	C:cytoplasm	Cytoplasmic	Unknown		Probable ANTIGEN	0.375646	0
442	CDS	R51_1	459284	460105	84.0394	2	+	822	Shikimate 5-dehydrogenase I alpha (EC 1.1.1.25)	Chorismate Synthesis; <br>Cluster containing Alanyl-tRNA synthetase; <br>Common Pathway For Synthesis of Aromatic Compounds (DAHP synthase to chorismate)		locus|R51_00444		C (cytoplasmic)	C:cytoplasm	Cytoplasmic	Cytoplasmic			0.273861	0
443	CDS	R51_1	460102	460359	15.3423	1	+	258	FIG00640156: hypothetical protein	- none -		locus|R51_00445		C (cytoplasmic)	C:cytoplasm	Cytoplasmic	Unknown			0.264599	0
444	CDS	R51_1	460889	460335	87.7032	-2	-	555	carbonic anhydrase, family 3	- none -		locus|R51_00446		C (cytoplasmic)	C:cytoplasm	Cytoplasmic	Cytoplasmic		Probable ANTIGEN	0.276371	0
445	CDS	R51_1	466742	467770	90.8862	2	+	1029	UDP-N-acetylenolpyruvoylglucosamine reductase (EC 1.1.1.158)	Peptidoglycan Biosynthesis; <br>UDP-N-acetylmuramate from Fructose-6-phosphate Biosynthesis		locus|R51_00451		C (cytoplasmic)	C:cytoplasm	Cytoplasmic	Cytoplasmic			0.403312	0
446	CDS	R51_1	467767	468729	90.9091	1	+	963	Biotin operon repressor / Biotin-protein ligase (EC 6.3.4.15)	Biotin biosynthesis; <br>Biotin biosynthesis; <br>Biotin synthesis cluster; <br>Biotin synthesis cluster		locus|R51_00452		IM (inner membrane)	C:cytoplasm	Cytoplasmic	Cytoplasmic			0.349837	0
447	CDS	R51_1	469690	468764	90.0389	-1	-	927	Pantothenate kinase (EC 2.7.1.33)	Coenzyme A Biosynthesis		locus|R51_00453		C (cytoplasmic)	C:cytoplasm	Cytoplasmic	Cytoplasmic			0.597408	0
448	CDS	R51_1	470673	471857	91.619	3	+	1185	Translation elongation factor Tu	Mycobacterium virulence operon involved in protein synthesis (SSU ribosomal proteins); <br>Translation elongation factors bacterial; <br>Universal GTPases		locus|R51_00458		C (cytoplasmic)	C:cytoplasm	Cytoplasmic	Cytoplasmic			0.501225	0
449	CDS	R51_1	472087	472470	18.5024	1	+	384	Preprotein translocase subunit SecE (TC 3.A.5.1.1)	LSU ribosomal proteins cluster		locus|R51_00459		IM (inner membrane)	C:plasma membrane	InnerMembrane	CytoplasmicMembrane			0.387241	3
450	CDS	R51_1	472472	473017	90.4969	2	+	546	Transcription antitermination protein NusG	LSU ribosomal proteins cluster; <br>Transcription factors bacterial		locus|R51_00460		C (cytoplasmic)	C:cytoplasm	Cytoplasmic	Cytoplasmic			0.373049	0
451	CDS	R51_1	473175	473603	90.9091	3	+	429	LSU ribosomal protein L11p (L12e)	LSU ribosomal proteins cluster; <br>Ribosome LSU bacterial		locus|R51_00461		C (cytoplasmic)	C:cytoplasm	Periplasmic	Cytoplasmic			0.255071	0
452	CDS	R51_1	473607	474311	90.9091	3	+	705	LSU ribosomal protein L1p (L10Ae)	LSU ribosomal proteins cluster; <br>Ribosome LSU bacterial		locus|R51_00462		C (cytoplasmic)	C:cytoplasm	Cytoplasmic	Cytoplasmic		Probable ANTIGEN	0.243585	0
453	CDS	R51_1	474727	475224	90.1305	1	+	498	LSU ribosomal protein L10p (P0)	LSU ribosomal proteins cluster; <br>Ribosome LSU bacterial		locus|R51_00463		C (cytoplasmic)	C:cytoplasm	Cytoplasmic	Cytoplasmic			0.567352	0
454	CDS	R51_1	475291	475656	90.7717	1	+	366	LSU ribosomal protein L7/L12 (P1/P2)	LSU ribosomal proteins cluster; <br>Ribosome LSU bacterial		locus|R51_00464		C (cytoplasmic)	C:cytoplasm	Cytoplasmic	Unknown		Probable ANTIGEN	0.436332	0
455	CDS	R51_1	475974	480002	98.1681	3	+	4029	DNA-directed RNA polymerase beta subunit (EC 2.7.7.6)	Mycobacterium virulence operon involved in DNA transcription; <br>RNA polymerase bacterial		locus|R51_00465		OM (Outer Membrane)	C:cytoplasm	Cytoplasmic	Cytoplasmic			0.302974	0
456	CDS	R51_1	480079	484302	95.8782	1	+	4224	DNA-directed RNA polymerase beta&#39; subunit (EC 2.7.7.6)	Mycobacterium virulence operon involved in DNA transcription; <br>RNA polymerase bacterial		locus|R51_00466		C (cytoplasmic)	C:cytoplasm	Cytoplasmic	Cytoplasmic			0.621404	0
457	CDS	R51_1	485017	484673	46.3018	-1	-	345	FIG01046757: hypothetical protein	- none -		locus|R51_00467		EC (Extracellular)	C:cytoplasm	Periplasmic	Unknown		Probable ANTIGEN	0.404598	0
458	CDS	R51_1	485108	484971	47.8131	-2	-	138	FIG01046757: hypothetical protein	- none -		locus|R51_00468		unknown	C:outer membrane	Cytoplasmic	Unknown			0.391093	0
459	CDS	R51_1	485416	486426	90.9091	1	+	1011	putative cytoplasmic protein	- none -		locus|R51_00469		C (cytoplasmic)	C:cytoplasm	Cytoplasmic	Cytoplasmic			0.239937	0
460	CDS	R51_1	488221	487088	90.9091	-1	-	1134	Thiazole biosynthesis protein ThiH	Thiamin biosynthesis		locus|R51_00470		C (cytoplasmic)	C:cytoplasm	Cytoplasmic	Cytoplasmic			0.41884	0
461	CDS	R51_1	488988	488218	90.9091	-3	-	771	Thiazole biosynthesis protein ThiG	Thiamin biosynthesis		locus|R51_00471		C (cytoplasmic)	C:cytoplasm	Cytoplasmic	Cytoplasmic			0.260856	0
462	CDS	R51_1	489929	489171	85.4362	-2	-	759	Sulfur carrier protein adenylyltransferase ThiF	Thiamin biosynthesis		locus|R51_00472		C (cytoplasmic)	C:plasma membrane	Cytoplasmic	Cytoplasmic			0.390106	1
463	CDS	R51_1	490557	489922	27.891	-3	-	636	Thiamin-phosphate pyrophosphorylase (EC 2.5.1.3)	5-FCL-like protein; <br>Thiamin biosynthesis		locus|R51_00473		C (cytoplasmic)	C:cytoplasm	Cytoplasmic	Cytoplasmic			0.269487	0
464	CDS	R51_1	492452	490557	90.9091	-2	-	1896	Thiamin biosynthesis protein ThiC	Thiamin biosynthesis		locus|R51_00474		C (cytoplasmic)	C:cytoplasm	Cytoplasmic	Cytoplasmic			0.372983	0
465	CDS	R51_1	493304	492816	90.6114	-2	-	489	Regulator of sigma D	- none -		locus|R51_00475		C (cytoplasmic)	C:cytoplasm	Cytoplasmic	Cytoplasmic			0.500791	0
466	CDS	R51_1	493397	494170	72.5899	2	+	774	NADH pyrophosphatase (EC 3.6.1.22)	Nudix proteins (nucleoside triphosphate hydrolases)		locus|R51_00476		C (cytoplasmic)	C:cytoplasm	Cytoplasmic	Cytoplasmic			0.544938	0
467	CDS	R51_1	494211	495275	90.9091	3	+	1065	Uroporphyrinogen III decarboxylase (EC 4.1.1.37)	Heme and Siroheme Biosynthesis		locus|R51_00477		C (cytoplasmic)	C:cytoplasm	Cytoplasmic	Cytoplasmic			0.795017	0
468	CDS	R51_1	495285	495956	88.5963	3	+	672	Endonuclease V (EC 3.1.21.7)	DNA repair, bacterial		locus|R51_00478		C (cytoplasmic)	C:cytoplasm	Cytoplasmic	Cytoplasmic			0.286406	0
469	CDS	R51_1	495998	496588	79.368	2	+	591	FIG01200173: hypothetical protein	- none -		locus|R51_00479		C (cytoplasmic)	C:cytoplasm	Cytoplasmic	Cytoplasmic			0.351583	0
470	CDS	R51_1	496775	497047	67.3002	2	+	273	DNA-binding protein HU-alpha	DNA structural proteins, bacterial		locus|R51_00480		C (cytoplasmic)	C:cytoplasm	Periplasmic	Cytoplasmic		Probable ANTIGEN	0.431216	0
471	CDS	R51_1	497059	497751	85.9629	1	+	693	FIG00638261: hypothetical protein	- none -		locus|R51_00481		OM (Outer Membrane)	C:extracellular space	Cytoplasmic	Unknown	SP		0.307921	0
1455	CDS	R51_1	1522944	1521619	92.8097	-3	-	1326	Putative exported protein precursor	- none -		locus|R51_01489		EC (Extracellular)	C:extracellular space	OuterMembrane	Unknown	SP	Probable ANTIGEN	0.655432	0	0.3721
473	CDS	R51_1	498311	499897	90.9091	2	+	1587	Sensor protein of zinc sigma-54-dependent two-component system	Zinc resistance		locus|R51_00483		IM (inner membrane)	C:plasma membrane	InnerMembrane	CytoplasmicMembrane			0.273468	2
474	CDS	R51_1	499903	501228	93.428	1	+	1326	Response regulator of zinc sigma-54-dependent two-component system	Zinc resistance		locus|R51_00484		C (cytoplasmic)	C:cytoplasm	Cytoplasmic	Cytoplasmic			0.291043	0
475	CDS	R51_1	502514	501225	95.0538	-2	-	1290	Phosphoribosylamine--glycine ligase (EC 6.3.4.13)	De Novo Purine Biosynthesis		locus|R51_00485		C (cytoplasmic)	C:cytoplasm	Cytoplasmic	Cytoplasmic			0.300905	0
476	CDS	R51_1	504115	502526	95.924	-1	-	1590	IMP cyclohydrolase (EC 3.5.4.10) / Phosphoribosylaminoimidazolecarboxamide formyltransferase (EC 2.1.2.3)	5-FCL-like protein; <br>De Novo Purine Biosynthesis; <br>De Novo Purine Biosynthesis		locus|R51_00486		C (cytoplasmic)	C:cytoplasm	Cytoplasmic	Cytoplasmic			0.729994	0
477	CDS	R51_1	510771	510241	85.9629	-3	-	531	Molybdopterin-guanine dinucleotide biosynthesis protein MobB	Molybdenum cofactor biosynthesis; <br>ar-431-EC Molybdopterin-guanine dinucleotide biosynthesis		locus|R51_00491		C (cytoplasmic)	C:cytoplasm	Cytoplasmic	Cytoplasmic			0.335833	0
478	CDS	R51_1	511337	510753	78.1543	-2	-	585	Molybdopterin-guanine dinucleotide biosynthesis protein MobA	Molybdenum cofactor biosynthesis; <br>ar-431-EC Molybdopterin-guanine dinucleotide biosynthesis		locus|R51_00492		C (cytoplasmic)	C:cytoplasm	Cytoplasmic	Cytoplasmic			0.332717	0
479	CDS	R51_1	511407	511676	70.3687	3	+	270	Protein yihD	CBSS-360102.4.peg.4134		locus|R51_00493		C (cytoplasmic)	C:cytoplasm	Cytoplasmic	Cytoplasmic			0.356201	0
480	CDS	R51_1	511753	512739	85.4362	1	+	987	YihE protein, a ser/thr kinase implicated in LPS synthesis and Cpx signalling	CBSS-360102.4.peg.4134		locus|R51_00494		C (cytoplasmic)	C:cytoplasm	Cytoplasmic	Cytoplasmic			0.561075	0
481	CDS	R51_1	512756	513379	91.7106	2	+	624	Periplasmic thiol:disulfide interchange protein DsbA	Biogenesis of c-type cytochromes; <br>CBSS-360102.4.peg.4134; <br>Periplasmic disulfide interchange		locus|R51_00495		P (Periplasm)	C:extracellular space	Periplasmic	Periplasmic	SP		0.471225	0
482	CDS	R51_1	514300	513392	87.6803	-1	-	909	1-acyl-sn-glycerol-3-phosphate acyltransferase (EC 2.3.1.51)	Glycerolipid and Glycerophospholipid Metabolism in Bacteria		locus|R51_00496		P (Periplasm)	C:plasma membrane	InnerMembrane	CytoplasmicMembrane			0.273391	3
483	CDS	R51_1	514688	517474	98.2597	2	+	2787	DNA polymerase I (EC 2.7.7.7)	DNA Repair Base Excision		locus|R51_00497		C (cytoplasmic)	C:cytoplasm	Cytoplasmic	Cytoplasmic			0.314936	0
484	CDS	R51_1	518440	517808	90.1763	-1	-	633	GTP-binding protein EngB	Universal GTPases		locus|R51_00498		unknown	C:cytoplasm	Cytoplasmic	Cytoplasmic			0.413874	0
485	CDS	R51_1	518707	518904	57.8658	1	+	198	FIG01045817: hypothetical protein	- none -		locus|R51_00499		C (cytoplasmic)	C:cytoplasm	Cytoplasmic	Unknown			0.242022	0
486	CDS	R51_1	519277	519519	82.093	1	+	243	Protein of unknown function DUF414	- none -		locus|R51_00500		C (cytoplasmic)	C:cytoplasm	Cytoplasmic	Unknown		Probable ANTIGEN	0.249688	0
487	CDS	R51_1	519708	521081	90.9091	3	+	1374	Coproporphyrinogen III oxidase, oxygen-independent (EC 1.3.99.22)	Heme and Siroheme Biosynthesis		locus|R51_00501		C (cytoplasmic)	C:cytoplasm	Cytoplasmic	Cytoplasmic			0.320859	0
488	CDS	R51_1	521281	521171	66.8422	-1	-	111	hypothetical protein	- none -		locus|R51_00502		unknown		Cytoplasmic	Unknown			0.352039	0
489	CDS	R51_1	522803	521394	90.9091	-2	-	1410	Nitrogen regulation protein NR(I)	Ammonia assimilation		locus|R51_00503		C (cytoplasmic)	C:cytoplasm	Cytoplasmic	Cytoplasmic			0.320856	0
490	CDS	R51_1	523861	522812	90.1763	-1	-	1050	Nitrogen regulation protein NtrB (EC 2.7.13.3)	- none -		locus|R51_00504		unknown	C:cytoplasm	Cytoplasmic	CytoplasmicMembrane			0.631667	0
491	CDS	R51_1	525545	524136	90.932	-2	-	1410	Glutamine synthetase type I (EC 6.3.1.2)	Ammonia assimilation; <br>Glutamine, Glutamate, Aspartate and Asparagine Biosynthesis; <br>Glutamine synthetases; <br>Peptidoglycan Biosynthesis		locus|R51_00505		C (cytoplasmic)	C:cytoplasm	Cytoplasmic	Cytoplasmic			0.411374	0
492	CDS	R51_1	525921	527744	95.008	3	+	1824	GTP-binding protein TypA/BipA	Universal GTPases		locus|R51_00506		C (cytoplasmic)	C:cytoplasm	Cytoplasmic	CytoplasmicMembrane			0.31421	0
493	CDS	R51_1	528533	527799	90.5885	-2	-	735	Putative hydrolase	- none -		locus|R51_00507		C (cytoplasmic)	C:cytoplasm	Cytoplasmic	Cytoplasmic			0.303338	0
494	CDS	R51_1	529396	528518	79.1161	-1	-	879	FIG01046022: hypothetical protein	- none -		locus|R51_00508		C (cytoplasmic)	C:cytoplasm	Cytoplasmic	Cytoplasmic			0.638563	0
495	CDS	R51_1	530634	529393	90.9091	-3	-	1242	Hypothetical radical SAM family enzyme in interesting gene cluster	- none -		locus|R51_00509		unknown	C:cytoplasm	Cytoplasmic	Cytoplasmic			0.469208	0
496	CDS	R51_1	531511	530636	90.9091	-1	-	876	FIG01124638: hypothetical protein	- none -		locus|R51_00510		C (cytoplasmic)	C:cytoplasm	Extracellular	Unknown			0.411295	0
497	CDS	R51_1	532112	531504	64.8958	-2	-	609	FIG00638667: hypothetical protein	- none -		locus|R51_00511		C (cytoplasmic)	C:cytoplasm	InnerMembrane	Cytoplasmic			0.677835	0
498	CDS	R51_1	532490	532179	52.599	-2	-	312	FIG00638667: hypothetical protein	- none -		locus|R51_00512		C (cytoplasmic)	C:cytoplasm	Cytoplasmic	Unknown			0.678308	0
499	CDS	R51_1	533390	532542	90.6572	-2	-	849	FIG074102: hypothetical protein	- none -		locus|R51_00513		C (cytoplasmic)	C:cytoplasm	Cytoplasmic	Cytoplasmic			0.417149	0
1534	CDS	R51_1	1610182	1609319	95.008	-1	-	864	Nucleoside-specific channel-forming protein Tsx precursor	- none -		locus|R51_01568		OM (Outer Membrane)	C:extracellular space	OuterMembrane	OuterMembrane	SP	Probable ANTIGEN	0.644791	0	0.3935
501	CDS	R51_1	535728	534307	90.0389	-3	-	1422	Glucuronide transport protein YihO	- none -		locus|R51_00515		IM (inner membrane)	C:plasma membrane	InnerMembrane	CytoplasmicMembrane			0.442558	12
502	CDS	R51_1	537163	535796	90.7946	-1	-	1368	Glucuronide transport protein YihP, homologous to YihO	- none -		locus|R51_00516		IM (inner membrane)	C:plasma membrane	InnerMembrane	CytoplasmicMembrane			0.489406	9
503	CDS	R51_1	539245	537209	94.9164	-1	-	2037	Alpha-glucosyltransferase YihQ	- none -		locus|R51_00517		C (cytoplasmic)	C:cytoplasm	Periplasmic	Unknown			0.393153	0
504	CDS	R51_1	540131	539289	90.9091	-2	-	843	Sugar-1-epimerase YihR	- none -		locus|R51_00518		C (cytoplasmic)	C:cytoplasm	Cytoplasmic	Unknown			0.387854	0
505	CDS	R51_1	541391	540150	92.8784	-2	-	1242	Aldose-ketose isomerase YihS	- none -		locus|R51_00519		C (cytoplasmic)	C:cytoplasm	Cytoplasmic	Cytoplasmic			0.449091	0
506	CDS	R51_1	541862	541407	86.7186	-2	-	456	Aldolase YihT	- none -		locus|R51_00520		C (cytoplasmic)	C:cytoplasm	Periplasmic	Unknown			0.401719	0
507	CDS	R51_1	542781	541885	90.9091	-3	-	897	3-hydroxyisobutyrate dehydrogenase (EC 1.1.1.31)	- none -		locus|R51_00521		C (cytoplasmic)	C:cytoplasm	Periplasmic	Cytoplasmic			0.339437	0
508	CDS	R51_1	542946	543842	90.9091	3	+	897	Sugar kinase YihV	- none -		locus|R51_00522		C (cytoplasmic)	C:cytoplasm	Cytoplasmic	Cytoplasmic			0.28653	0
509	CDS	R51_1	543876	544679	80.055	3	+	804	DeoR-type transcriptional regulator YihW	- none -		locus|R51_00523		C (cytoplasmic)	C:cytoplasm	Cytoplasmic	Cytoplasmic			0.275052	0
510	CDS	R51_1	544870	545469	69.5443	1	+	600	Alpha-D-glucose-1-phosphatase	- none -		locus|R51_00524		C (cytoplasmic)	C:cytoplasm	Cytoplasmic	Cytoplasmic			0.398095	0
511	CDS	R51_1	545556	546335	56.3087	3	+	780	Inner membrane protein YihY, formerly thought to be RNase BN	Riboflavin synthesis cluster		locus|R51_00525		IM (inner membrane)	C:plasma membrane	InnerMembrane	CytoplasmicMembrane			0.223047	6
512	CDS	R51_1	546332	546769	71.9945	2	+	438	D-tyrosyl-tRNA(Tyr) deacylase (EC 3.6.1.n1)	- none -		locus|R51_00526		C (cytoplasmic)	C:cytoplasm	Cytoplasmic	Unknown			0.261515	0
513	CDS	R51_1	546814	547755	90.1076	1	+	942	GNAT family acetyltransferase YiiD potentially involved in tRNA processing	- none -		locus|R51_00527		C (cytoplasmic)	C:cytoplasm	Cytoplasmic	Cytoplasmic		Probable ANTIGEN	0.241781	0
514	CDS	R51_1	548216	547770	88.4589	-2	-	447	FIG074102: hypothetical protein	- none -		locus|R51_00528		C (cytoplasmic)	C:cytoplasm	Cytoplasmic	Cytoplasmic			0.277659	0
515	CDS	R51_1	548524	548213	32.5166	-1	-	312	Sea40	- none -		locus|R51_00529		C (cytoplasmic)	C:cytoplasm	Cytoplasmic	Unknown			0.405662	0
516	CDS	R51_1	549539	548610	82.0472	-2	-	930	Lipase, GDXG family	- none -		locus|R51_00530		C (cytoplasmic)	C:cytoplasm	Cytoplasmic	Cytoplasmic			0.567276	0
517	CDS	R51_1	549757	550068	34.3943	1	+	312	FIG00642734: hypothetical protein	- none -		locus|R51_00531		C (cytoplasmic)	C:cytoplasm	Cytoplasmic	Cytoplasmic			0.622449	0
518	CDS	R51_1	550069	550359	44.9966	1	+	291	Putative merR family bacterial regulatory protein	- none -		locus|R51_00532		C (cytoplasmic)	C:cytoplasm	Cytoplasmic	Unknown			0.369686	0
519	CDS	R51_1	551335	550406	90.9091	-1	-	930	formate dehydrogenase formation protein FdhE	Formate hydrogenase		locus|R51_00533		C (cytoplasmic)	C:cytoplasm	Cytoplasmic	Cytoplasmic			0.498483	0
520	CDS	R51_1	551964	551332	18.1818	-3	-	633	Formate dehydrogenase O gamma subunit (EC 1.2.1.2)	Formate dehydrogenase; <br>Formate hydrogenase		locus|R51_00534		IM (inner membrane)	C:plasma membrane	InnerMembrane	CytoplasmicMembrane			0.495698	4
521	CDS	R51_1	552863	551961	90.9091	-2	-	903	Formate dehydrogenase O beta subunit (EC 1.2.1.2)	Formate dehydrogenase; <br>Formate hydrogenase		locus|R51_00535		C (cytoplasmic)	C:plasma membrane	Periplasmic	CytoplasmicMembrane			0.475044	0
522	CDS	R51_1	555290	552876	99.1985	-2	-	2415	Formate dehydrogenase O alpha subunit (EC 1.2.1.2) @ selenocysteine-containing	Formate dehydrogenase; <br>Formate hydrogenase; <br>Selenocysteine metabolism		locus|R51_00536		C (cytoplasmic)	C:cytoplasm	Periplasmic	Periplasmic		Probable ANTIGEN	0.525534	0
1596	CDS	R51_1	1675388	1674195	94.9622	-2	-	1194	Membrane fusion protein of RND family multidrug efflux pump	Multidrug Resistance Efflux Pumps		locus|R51_01630		OM (Outer Membrane)	C:extracellular space	OuterMembrane	CytoplasmicMembrane	SP	Probable ANTIGEN	0.502402	0	0.7576	0.994505
524	CDS	R51_1	556154	556957	87.1537	2	+	804	Formate dehydrogenase chain D (EC 1.2.1.2)	Formate hydrogenase		locus|R51_00538		C (cytoplasmic)	C:cytoplasm	Cytoplasmic	Cytoplasmic			0.335365	0
525	CDS	R51_1	557668	557225	89.3062	-1	-	444	Putative lipoprotein	- none -		locus|R51_00539		C (cytoplasmic)	C:cytoplasm	Cytoplasmic	Cytoplasmic			0.338394	0
526	CDS	R51_1	558245	557646	90.9091	-2	-	600	putative inner membrane lipoprotein	- none -		locus|R51_00540		P (Periplasm)	C:extracellular space	Periplasmic	Unknown	SP		0.396055	0
1633	CDS	R51_1	1711616	1712749	95.1683	2	+	1134	Putative outer membrane protein	- none -		locus|R51_01667		OM (Outer Membrane)	C:extracellular space	OuterMembrane	OuterMembrane	SP	Probable ANTIGEN	0.834986	0	0.3958
528	CDS	R51_1	560207	559884	25.8988	-2	-	324	Inner membrane protein	- none -		locus|R51_00542		IM (inner membrane)	C:outer membrane	InnerMembrane	CytoplasmicMembrane			0.279823	4
529	CDS	R51_1	560866	560207	74.2157	-1	-	660	FIG00350115: hypothetical protein	- none -		locus|R51_00543		IM (inner membrane)	C:plasma membrane	InnerMembrane	CytoplasmicMembrane			0.308383	5
530	CDS	R51_1	560967	561515	77.2155	3	+	549	Transcriptional regulator	- none -		locus|R51_00544		C (cytoplasmic)	C:cytoplasm	Cytoplasmic	Cytoplasmic			0.37871	0
531	CDS	R51_1	561918	561604	63.1326	-3	-	315	L-rhamnose mutarotase	L-rhamnose utilization		locus|R51_00545		C (cytoplasmic)	C:cytoplasm	Cytoplasmic	Unknown			0.349417	0
532	CDS	R51_1	563063	561915	90.932	-2	-	1149	Lactaldehyde dehydrogenase involved in fucose or rhamnose utilization (EC 1.2.1.22)	L-fucose utilization; <br>L-fucose utilization temp; <br>L-rhamnose utilization		locus|R51_00546		C (cytoplasmic)	C:cytoplasm	Cytoplasmic	Cytoplasmic			0.395011	0
533	CDS	R51_1	564017	563190	88.1612	-2	-	828	Rhamnulose-1-phosphate aldolase (EC 4.1.2.19)	L-rhamnose utilization		locus|R51_00547		C (cytoplasmic)	C:cytoplasm	Cytoplasmic	Cytoplasmic			0.747594	0
534	CDS	R51_1	565419	564160	90.9091	-3	-	1260	L-rhamnose isomerase (EC 5.3.1.14)	L-rhamnose utilization		locus|R51_00548		C (cytoplasmic)	C:cytoplasm	Cytoplasmic	Cytoplasmic			0.482636	0
535	CDS	R51_1	566885	565416	93.6112	-2	-	1470	Rhamnulokinase (EC 2.7.1.5)	L-rhamnose utilization		locus|R51_00549		C (cytoplasmic)	C:cytoplasm	Cytoplasmic	Cytoplasmic			0.433953	0
536	CDS	R51_1	567173	568009	83.1005	2	+	837	L-rhamnose operon regulatory protein RhaS	L-rhamnose utilization		locus|R51_00550		C (cytoplasmic)	C:cytoplasm	Cytoplasmic	Cytoplasmic			0.458555	0
537	CDS	R51_1	568162	569010	82.0472	1	+	849	L-rhamnose operon transcriptional activator RhaR	L-rhamnose utilization		locus|R51_00551		C (cytoplasmic)	C:cytoplasm	Cytoplasmic	Cytoplasmic			0.468302	0
538	CDS	R51_1	570041	569007	72.6586	-2	-	1035	L-rhamnose-proton symporter	L-rhamnose utilization		locus|R51_00552		IM (inner membrane)	C:plasma membrane	InnerMembrane	CytoplasmicMembrane			0.247348	10
1672	CDS	R51_1	1750549	1751556	96.4278	1	+	1008	Fimbriae-like adhesin SfmH	The fimbrial Sfm cluster		locus|R51_01706		EC (Extracellular)	C:extracellular space	Extracellular	Unknown	SP	Probable ANTIGEN	0.673581	0	0.4157
540	CDS	R51_1	572808	571501	90.7717	-3	-	1308	Predicted rhamnogalacturonide-specific TRAP-type transporter, large transmembrane component RhiC	L-rhamnose utilization		locus|R51_00554		IM (inner membrane)	C:plasma membrane	InnerMembrane	CytoplasmicMembrane			0.453449	12
541	CDS	R51_1	573316	572801	75.6354	-1	-	516	Predicted rhamnogalacturonide-specific TRAP-type transporter, small transmembrane component RhiB	L-rhamnose utilization		locus|R51_00555		IM (inner membrane)	C:plasma membrane	InnerMembrane	CytoplasmicMembrane			0.385966	4
542	CDS	R51_1	574318	573335	90.9091	-1	-	984	Predicted rhamnogalacturonide-specific TRAP-type transporter, substrate-binding component RhiA	L-rhamnose utilization		locus|R51_00556		C (cytoplasmic)	C:extracellular space	Cytoplasmic	Unknown	SP		0.256521	0
543	CDS	R51_1	574647	575267	90.9091	3	+	621	Manganese superoxide dismutase (EC 1.15.1.1)	Oxidative stress; <br>Protection from Reactive Oxygen Species		locus|R51_00557		C (cytoplasmic)	C:cytoplasm	Periplasmic	Unknown			0.516183	0
544	CDS	R51_1	575337	576026	90.7946	3	+	690	Uncharacterized protein conserved in bacteria	- none -		locus|R51_00558		C (cytoplasmic)	C:cytoplasm	Cytoplasmic	Periplasmic			0.454451	0
545	CDS	R51_1	576038	576433	72.2235	2	+	396	Putative inner membrane protein	- none -		locus|R51_00559		C (cytoplasmic)	C:outer membrane	Cytoplasmic	Unknown			0.357152	0
546	CDS	R51_1	576554	576757	17.1972	2	+	204	FIG01045566: hypothetical protein	- none -		locus|R51_00560		C (cytoplasmic)	C:cytoplasm	Cytoplasmic	Unknown			0.30885	0
547	CDS	R51_1	578178	576805	91.39	-3	-	1374	Copper sensory histidine kinase CpxA	Orphan regulatory proteins		locus|R51_00561		IM (inner membrane)	C:plasma membrane	InnerMembrane	CytoplasmicMembrane			0.370606	2
548	CDS	R51_1	578873	578175	89.1917	-2	-	699	Copper-sensing two-component system response regulator CpxR	Orphan regulatory proteins		locus|R51_00562		C (cytoplasmic)	C:cytoplasm	Cytoplasmic	Cytoplasmic			0.451801	0
549	CDS	R51_1	579024	579524	90.9091	3	+	501	P pilus assembly/Cpx signaling pathway, periplasmic inhibitor/zinc-resistance associated protein	- none -		locus|R51_00563		P (Periplasm)	C:extracellular space	Periplasmic	Periplasmic	SP		0.535739	0
550	CDS	R51_1	580690	579710	90.9091	-1	-	981	Phage integrase	- none -		locus|R51_00564		C (cytoplasmic)	C:cytoplasm	Cytoplasmic	Cytoplasmic			0.386195	0
551	CDS	R51_1	581053	580760	53.1486	-1	-	294	C protein	- none -		locus|R51_00565		C (cytoplasmic)	C:cytoplasm	Cytoplasmic	Unknown			0.444021	0
552	CDS	R51_1	581190	581462	15.0905	3	+	273	Cox	- none -		locus|R51_00566		C (cytoplasmic)	C:cytoplasm	Cytoplasmic	Unknown			0.352058	0
553	CDS	R51_1	581632	582132	49.4619	1	+	501	Replication gene B protein	- none -		locus|R51_00567		C (cytoplasmic)	C:outer membrane	Cytoplasmic	Unknown			0.270997	0
554	CDS	R51_1	582196	582420	35.7912	1	+	225	FIG00638705: hypothetical protein	- none -		locus|R51_00568		C (cytoplasmic)	C:cytoplasm	Cytoplasmic	Unknown			0.316196	0
555	CDS	R51_1	582420	582626	28.1887	3	+	207	FIG00640077: hypothetical protein	- none -		locus|R51_00569		C (cytoplasmic)	C:cytoplasm	Cytoplasmic	Unknown			0.438535	0
556	CDS	R51_1	582722	582946	35.7454	2	+	225	Phage protein	- none -		locus|R51_00570		C (cytoplasmic)	C:cytoplasm	Cytoplasmic	Unknown			0.408021	0
557	CDS	R51_1	582943	583218	62.5143	1	+	276	FIG00639324: hypothetical protein	- none -		locus|R51_00571		C (cytoplasmic)	C:cytoplasm	Cytoplasmic	Unknown			0.393078	0
558	CDS	R51_1	583208	585484	93.5883	2	+	2277	Phage replication protein	Phage replication		locus|R51_00572		unknown	C:cytoplasm	Cytoplasmic	Unknown			0.387961	0
1799	CDS	R51_1	1883656	1885062	96.153	1	+	1407	N-acetylglucosamine-regulated outer membrane porin	Chitin and N-acetylglucosamine utilization		locus|R51_01839		OM (Outer Membrane)	C:extracellular space	OuterMembrane	Unknown	SP	Probable ANTIGEN	0.652046	1	0.5588	0.983516
560	CDS	R51_1	587601	586567	90.9091	-3	-	1035	Phage-related capsid packaging protein	Phage packaging machinery		locus|R51_00574		C (cytoplasmic)	C:cytoplasm	Cytoplasmic	Unknown			0.297646	0
561	CDS	R51_1	589373	587601	90.9091	-2	-	1773	Phage terminase, ATPase subunit	Phage packaging machinery		locus|R51_00575		C (cytoplasmic)	C:cytoplasm	Cytoplasmic	Unknown			0.428986	0
562	CDS	R51_1	589547	590401	90.9091	2	+	855	Phage capsid scaffolding protein	Phage capsid proteins		locus|R51_00576		C (cytoplasmic)	C:cytoplasm	Cytoplasmic	Cytoplasmic			0.436032	0
563	CDS	R51_1	590456	591529	91.5503	2	+	1074	Phage major capsid protein #Fam0066	Phage capsid proteins		locus|R51_00577		EC (Extracellular)	C:cytoplasm	Cytoplasmic	Cytoplasmic			0.50198	0
564	CDS	R51_1	591533	592276	90.7946	2	+	744	Phage terminase, endonuclease subunit	Phage packaging machinery		locus|R51_00578		C (cytoplasmic)	C:cytoplasm	Periplasmic	Cytoplasmic			0.498219	0
565	CDS	R51_1	592375	592884	55.3469	1	+	510	Phage head completion-stabilization protein	Phage capsid proteins		locus|R51_00579		C (cytoplasmic)	C:cytoplasm	Cytoplasmic	Unknown			0.362426	0
566	CDS	R51_1	592884	593087	83.673	3	+	204	Phage tail completion protein	Phage tail proteins; <br>Phage tail proteins 2		locus|R51_00580		C (cytoplasmic)	C:cytoplasm	Cytoplasmic	Unknown			0.340171	0
567	CDS	R51_1	593091	593372	41.035	3	+	282	Phage holin	Phage lysis modules		locus|R51_00581		IM (inner membrane)	C:plasma membrane	Cytoplasmic	CytoplasmicMembrane			0.700826	3
568	CDS	R51_1	593372	593869	80.3755	2	+	498	Phage lysin, 1,4-beta-N-acetylmuramidase (EC 3.2.1.17) or lysozyme #Protein S in phage lambda	Phage lysis modules		locus|R51_00582		C (cytoplasmic)	C:cytoplasm	Cytoplasmic	Unknown			0.53164	0
569	CDS	R51_1	593884	594309	33.4326	1	+	426	Phage holin; Phage endolysin	Phage lysis modules; <br>Phage lysis modules		locus|R51_00583		IM (inner membrane)	C:plasma membrane	InnerMembrane	CytoplasmicMembrane			0.304333	3
570	CDS	R51_1	594297	594722	79.2993	3	+	426	Protein lysB	- none -		locus|R51_00584		OM (Outer Membrane)	C:plasma membrane	Periplasmic	Unknown			0.448687	1
571	CDS	R51_1	594709	594867	86.398	1	+	159	Phage outer membrane lipoprotein Rz1	Phage lysis modules		locus|R51_00585		unknown	C:cytoplasm	Cytoplasmic	Unknown			0.636933	0
572	CDS	R51_1	594830	595297	90.3824	2	+	468	Phage tail protein # FIG072132 and FIG003673	Phage tail proteins		locus|R51_00586		C (cytoplasmic)	C:cytoplasm	Cytoplasmic	Unknown			0.663158	0
573	CDS	R51_1	595290	595742	76.5514	3	+	453	Phage tail completion protein	Phage tail proteins; <br>Phage tail proteins 2		locus|R51_00587		C (cytoplasmic)	C:cytoplasm	Cytoplasmic	Unknown			0.414952	0
574	CDS	R51_1	595809	596444	79.6199	3	+	636	Baseplate assembly protein V	- none -		locus|R51_00588		unknown	C:cytoplasm	Extracellular	Unknown		Probable ANTIGEN	0.32113	0
575	CDS	R51_1	596441	596788	69.5443	2	+	348	Phage baseplate assembly protein W	- none -		locus|R51_00589		EC (Extracellular)	C:outer membrane	Cytoplasmic	Unknown			0.686609	0
576	CDS	R51_1	596793	597701	74.0554	3	+	909	Baseplate assembly protein J	- none -		locus|R51_00590		C (cytoplasmic)	C:cytoplasm	Cytoplasmic	Cytoplasmic			0.440958	0
577	CDS	R51_1	597694	598305	72.9563	1	+	612	Phage tail fibers	Phage tail fiber proteins		locus|R51_00591		unknown	C:cytoplasm	Cytoplasmic	Cytoplasmic			0.431036	0
578	CDS	R51_1	598302	599594	98.3284	3	+	1293	Phage tail fiber protein	Phage tail fiber proteins		locus|R51_00592		EC (Extracellular)	C:cytoplasm	Periplasmic	Extracellular		Probable ANTIGEN	0.62341	0
579	CDS	R51_1	599594	600187	90.9091	2	+	594	Phage tail fiber assembly protein	Phage tail fiber proteins		locus|R51_00593		C (cytoplasmic)	C:cytoplasm	Cytoplasmic	Unknown			0.596166	0
580	CDS	R51_1	600599	600159	90.6572	-2	-	441	Tail fiber assembly protein	- none -		locus|R51_00594		C (cytoplasmic)	C:cytoplasm	Cytoplasmic	Unknown			0.416612	0
581	CDS	R51_1	601028	601621	60.5679	2	+	594	Phage DNA invertase	- none -		locus|R51_00595		C (cytoplasmic)	C:cytoplasm	Cytoplasmic	Cytoplasmic			0.749036	0
582	CDS	R51_1	601681	602871	90.932	1	+	1191	Phage major tail sheath protein	Phage tail proteins		locus|R51_00596		EC (Extracellular)	C:cytoplasm	OuterMembrane	Unknown			0.432836	0
583	CDS	R51_1	602884	603402	82.1388	1	+	519	Phage major tail tube protein	Phage tail proteins		locus|R51_00597		C (cytoplasmic)	C:cytoplasm	Cytoplasmic	Cytoplasmic			0.458238	0
584	CDS	R51_1	603460	603735	74.9485	1	+	276	Tail protein	- none -		locus|R51_00598		C (cytoplasmic)	C:cytoplasm	Cytoplasmic	Unknown		Probable ANTIGEN	0.327088	0
585	CDS	R51_1	603880	606327	96.8628	1	+	2448	Phage protein	- none -		locus|R51_00599		IM (inner membrane)	C:plasma membrane	InnerMembrane	CytoplasmicMembrane			0.490508	4
586	CDS	R51_1	606342	606821	76.8262	3	+	480	Phage tail protein	Phage tail proteins		locus|R51_00600		C (cytoplasmic)	C:cytoplasm	Periplasmic	Unknown			0.438268	0
587	CDS	R51_1	606821	607984	90.9091	2	+	1164	Gene D protein	- none -		locus|R51_00601		C (cytoplasmic)	C:cytoplasm	Cytoplasmic	Cytoplasmic			0.398848	0
588	CDS	R51_1	608066	608284	57.4536	2	+	219	putative positive regulator of late gene transcription	- none -		locus|R51_00602		C (cytoplasmic)	C:cytoplasm	Cytoplasmic	Unknown			0.482169	0
589	CDS	R51_1	608425	609066	86.7186	1	+	642	hypothetical protein	- none -		locus|R51_00603		C (cytoplasmic)	C:cytoplasm	OuterMembrane	Unknown			0.662637	0
590	CDS	R51_1	609273	610175	88.4589	3	+	903	Cobalt-zinc-cadmium resistance protein	Cobalt-zinc-cadmium resistance		locus|R51_00604		IM (inner membrane)	C:plasma membrane	InnerMembrane	CytoplasmicMembrane			0.467888	6
591	CDS	R51_1	610360	611322	90.9091	1	+	963	6-phosphofructokinase (EC 2.7.1.11)	D-Tagatose and Galactitol Utilization; <br>Glycolysis and Gluconeogenesis		locus|R51_00605		unknown	C:cytoplasm	Cytoplasmic	Cytoplasmic			0.537532	0
592	CDS	R51_1	611526	612515	94.8706	3	+	990	Sulfate-binding protein Sbp	Inorganic Sulfur Assimilation		locus|R51_00606		P (Periplasm)	C:extracellular space	Periplasmic	Periplasmic	SP		0.60451	0
593	CDS	R51_1	612616	613371	77.559	1	+	756	CDP-diacylglycerol pyrophosphatase (EC 3.6.1.26)	Glycerolipid and Glycerophospholipid Metabolism in Bacteria		locus|R51_00607		P (Periplasm)	C:plasma membrane	Cytoplasmic	CytoplasmicMembrane			0.37251	1
594	CDS	R51_1	613635	614969	90.9091	3	+	1335	Melibiose carrier protein, Na+/melibiose symporter	Melibiose Utilization		locus|R51_00608		IM (inner membrane)	C:plasma membrane	InnerMembrane	CytoplasmicMembrane			0.305787	11
595	CDS	R51_1	614980	615939	90.7946	1	+	960	Fructokinase (EC 2.7.1.4)	Fructose utilization; <br>Mannitol Utilization		locus|R51_00609		C (cytoplasmic)	C:cytoplasm	Cytoplasmic	Cytoplasmic		Probable ANTIGEN	0.423688	0
596	CDS	R51_1	615949	616989	90.9091	1	+	1041	ADP-ribosylglycohydrolase (EC 3.2.-.-)	- none -		locus|R51_00610		P (Periplasm)	C:cytoplasm	Cytoplasmic	Unknown	SP		0.531221	0
597	CDS	R51_1	617052	617774	84.4745	3	+	723	Transcriptional regulator, GntR family	- none -		locus|R51_00611		C (cytoplasmic)	C:cytoplasm	Cytoplasmic	Cytoplasmic			0.302057	0
598	CDS	R51_1	617872	618042	1.94642	1	+	171	FIG00638667: hypothetical protein	- none -		locus|R51_00612		unknown	C:plasma membrane	InnerMembrane	CytoplasmicMembrane			0.661813	1
599	CDS	R51_1	618629	618279	65.9492	-2	-	351	Mannose-6-phosphate isomerase (EC 5.3.1.8)	Mannose Metabolism		locus|R51_00613		C (cytoplasmic)	C:cytoplasm	Cytoplasmic	Unknown			0.271516	0
600	CDS	R51_1	620235	618643	91.0007	-3	-	1593	Autoinducer 2 (AI-2) kinase LsrK (EC 2.7.1.-)	Autoinducer 2 (AI-2) transport and processing (lsrACDBFGE operon)		locus|R51_00614		C (cytoplasmic)	C:cytoplasm	Cytoplasmic	Cytoplasmic			0.427797	0
601	CDS	R51_1	621281	620322	90.3595	-2	-	960	LsrR, transcriptional repressor of lsr operon	Autoinducer 2 (AI-2) transport and processing (lsrACDBFGE operon)		locus|R51_00615		unknown	C:cytoplasm	Cytoplasmic	Unknown			0.438746	0
602	CDS	R51_1	621538	623046	90.9091	1	+	1509	Autoinducer 2 (AI-2) ABC transport system, fused AI2 transporter subunits and ATP-binding component	Autoinducer 2 (AI-2) transport and processing (lsrACDBFGE operon)		locus|R51_00616		C (cytoplasmic)	C:cytoplasm	Cytoplasmic	CytoplasmicMembrane			0.537389	0
603	CDS	R51_1	623067	624110	79.6657	3	+	1044	Autoinducer 2 (AI-2) ABC transport system, membrane channel protein LsrC	Autoinducer 2 (AI-2) transport and processing (lsrACDBFGE operon)		locus|R51_00617		IM (inner membrane)	C:plasma membrane	InnerMembrane	CytoplasmicMembrane			0.652254	9
604	CDS	R51_1	624110	625108	70.8267	2	+	999	Autoinducer 2 (AI-2) ABC transport system, membrane channel protein LsrD	Autoinducer 2 (AI-2) transport and processing (lsrACDBFGE operon)		locus|R51_00618		IM (inner membrane)	C:plasma membrane	InnerMembrane	CytoplasmicMembrane			0.339936	9
605	CDS	R51_1	625137	626159	97.0231	3	+	1023	Autoinducer 2 (AI-2) ABC transport system, periplasmic AI-2 binding protein LsrB	Autoinducer 2 (AI-2) transport and processing (lsrACDBFGE operon)		locus|R51_00619		P (Periplasm)	C:extracellular space	Periplasmic	Periplasmic	SP		0.347147	0
606	CDS	R51_1	626188	627063	89.123	1	+	876	Autoinducer 2 (AI-2) aldolase LsrF (EC 4.2.1.-)	Autoinducer 2 (AI-2) transport and processing (lsrACDBFGE operon)		locus|R51_00620		C (cytoplasmic)	C:cytoplasm	Cytoplasmic	Cytoplasmic			0.245494	0
607	CDS	R51_1	627142	627435	20.4259	1	+	294	Autoinducer 2 (AI-2) modifying protein LsrG	Autoinducer 2 (AI-2) transport and processing (lsrACDBFGE operon)		locus|R51_00621		C (cytoplasmic)	C:cytoplasm	Cytoplasmic	Unknown			0.259136	0
608	CDS	R51_1	627445	628209	63.3616	1	+	765	Ribulose-phosphate 3-epimerase (EC 5.1.3.1)	Conserved gene cluster associated with Met-tRNA formyltransferase; <br>Pentose phosphate pathway; <br>Riboflavin synthesis cluster		locus|R51_00622		C (cytoplasmic)	C:plasma membrane	InnerMembrane	CytoplasmicMembrane			0.560426	1
609	CDS	R51_1	629068	628301	90.9091	-1	-	768	Triosephosphate isomerase (EC 5.3.1.1)	CBSS-331978.3.peg.2915; <br>Glycolysis and Gluconeogenesis		locus|R51_00623		C (cytoplasmic)	C:cytoplasm	Cytoplasmic	Cytoplasmic			0.338307	0
610	CDS	R51_1	629777	629181	90.9091	-2	-	597	Putative uncharacterized protein YiiQ	- none -		locus|R51_00624		unknown	C:extracellular space	Periplasmic	Unknown	SP		0.513314	0
611	CDS	R51_1	629878	630306	47.4468	1	+	429	Putative membrane protein	- none -		locus|R51_00625		IM (inner membrane)	C:plasma membrane	InnerMembrane	CytoplasmicMembrane			0.373259	4
612	CDS	R51_1	631158	630412	90.6572	-3	-	747	Ferredoxin--NADP(+) reductase (EC 1.18.1.2)	Biogenesis of cytochrome c oxidases; <br>Inorganic Sulfur Assimilation		locus|R51_00626		C (cytoplasmic)	C:cytoplasm	Cytoplasmic	Cytoplasmic			0.271937	0
613	CDS	R51_1	632265	631255	90.9091	-3	-	1011	Fructose-1,6-bisphosphatase, GlpX type (EC 3.1.3.11)	Glycolysis and Gluconeogenesis		locus|R51_00627		C (cytoplasmic)	C:cytoplasm	Cytoplasmic	Cytoplasmic			0.408853	0
614	CDS	R51_1	633885	632377	93.6799	-3	-	1509	Glycerol kinase (EC 2.7.1.30)	Glycerol and Glycerol-3-phosphate Uptake and Utilization; <br>Glycerolipid and Glycerophospholipid Metabolism in Bacteria		locus|R51_00628		C (cytoplasmic)	C:cytoplasm	Cytoplasmic	Cytoplasmic			0.79313	0
615	CDS	R51_1	634751	633906	70.0939	-2	-	846	Glycerol uptake facilitator protein	Glycerol and Glycerol-3-phosphate Uptake and Utilization; <br>Osmoregulation		locus|R51_00629		IM (inner membrane)	C:plasma membrane	InnerMembrane	CytoplasmicMembrane			0.330555	6
616	CDS	R51_1	635018	635116	46.9659	2	+	99	hypothetical protein	- none -		locus|R51_00630		unknown		Cytoplasmic	Unknown			0.323112	0
617	CDS	R51_1	635150	635389	46.4392	2	+	240	FIG074102: hypothetical protein	- none -		locus|R51_00631		C (cytoplasmic)	C:cytoplasm	Cytoplasmic	Unknown		Probable ANTIGEN	0.480264	0
618	CDS	R51_1	636096	635611	83.8562	-3	-	486	Ribonuclease E inhibitor RraA	RNA processing and degradation, bacterial		locus|R51_00632		C (cytoplasmic)	C:cytoplasm	Cytoplasmic	Cytoplasmic			0.762044	0
619	CDS	R51_1	637118	636189	74.5134	-2	-	930	1,4-dihydroxy-2-naphthoate polyprenyltransferase (EC 2.5.1.74)	Menaquinone and Phylloquinone Biosynthesis; <br>Menaquinone and Phylloquinone Biosynthesis -- gjo		locus|R51_00633		IM (inner membrane)	C:plasma membrane	InnerMembrane	CytoplasmicMembrane			0.615617	9
620	CDS	R51_1	638516	637185	94.0921	-2	-	1332	ATP-dependent hsl protease ATP-binding subunit HslU	Proteasome bacterial; <br>Proteolysis in bacteria, ATP-dependent		locus|R51_00634		C (cytoplasmic)	C:cytoplasm	Cytoplasmic	Cytoplasmic			0.31785	0
621	CDS	R51_1	639056	638526	87.4971	-2	-	531	ATP-dependent protease HslV (EC 3.4.25.-)	Proteasome bacterial; <br>Proteolysis in bacteria, ATP-dependent		locus|R51_00635		C (cytoplasmic)	C:cytoplasm	Cytoplasmic	Cytoplasmic			0.288783	0
622	CDS	R51_1	640029	639148	90.9091	-3	-	882	Cell division protein FtsN	Bacterial Cytoskeleton		locus|R51_00636		IM (inner membrane)	C:plasma membrane	Periplasmic	CytoplasmicMembrane		Probable ANTIGEN	0.302467	1
623	CDS	R51_1	641241	640216	90.8404	-3	-	1026	Transcriptional (co)regulator CytR	CytR regulation		locus|R51_00637		C (cytoplasmic)	C:cytoplasm	Cytoplasmic	Cytoplasmic			0.299549	0
624	CDS	R51_1	643594	641396	90.9091	-1	-	2199	Helicase PriA essential for oriC/DnaA-independent DNA replication	Conserved gene cluster associated with Met-tRNA formyltransferase		locus|R51_00638		C (cytoplasmic)	C:cytoplasm	Cytoplasmic	Cytoplasmic			0.339173	0
625	CDS	R51_1	643798	644010	48.8665	1	+	213	LSU ribosomal protein L31p @ LSU ribosomal protein L31p, zinc-dependent	Ribosome LSU bacterial; <br>Ribosome LSU bacterial		locus|R51_00639		unknown	C:cytoplasm	Cytoplasmic	Cytoplasmic			0.483502	0
626	CDS	R51_1	644718	644056	90.9091	-3	-	663	FIG01046148: hypothetical protein	- none -		locus|R51_00640		OM (Outer Membrane)	C:extracellular space	Periplasmic	Unknown	SP		0.621902	0
627	CDS	R51_1	646709	644919	95.7637	-2	-	1791	Putative arylsulfate sulfotransferase (EC 2.8.2.22)	- none -		locus|R51_00641		OM (Outer Membrane)	C:extracellular space	Periplasmic	Unknown	SP		0.420891	1
628	CDS	R51_1	647483	647166	89.9473	-2	-	318	Methionine repressor MetJ	Methionine Biosynthesis		locus|R51_00642		C (cytoplasmic)	C:cytoplasm	Cytoplasmic	Cytoplasmic			0.382202	0
629	CDS	R51_1	647748	648908	90.9091	3	+	1161	Cystathionine gamma-synthase (EC 2.5.1.48)	L-Cystine Uptake and Metabolism; <br>Methionine Biosynthesis		locus|R51_00643		C (cytoplasmic)	C:cytoplasm	Cytoplasmic	Cytoplasmic			0.378469	0
630	CDS	R51_1	648911	651343	90.9091	2	+	2433	Aspartokinase (EC 2.7.2.4) / Homoserine dehydrogenase (EC 1.1.1.3)	CBSS-216591.1.peg.168; <br>Lysine Biosynthesis DAP Pathway; <br>Lysine Biosynthesis DAP Pathway, GJO scratch; <br>Methionine Biosynthesis; <br>Threonine and Homoserine Biosynthesis; <br>Threonine and Homoserine Biosynthesis		locus|R51_00644		unknown	C:cytoplasm	Cytoplasmic	CytoplasmicMembrane			0.289289	0
631	CDS	R51_1	652316	651459	90.245	-2	-	858	Small-conductance mechanosensitive channel	- none -		locus|R51_00645		IM (inner membrane)	C:plasma membrane	InnerMembrane	CytoplasmicMembrane			0.291376	3
632	CDS	R51_1	653317	652319	71.422	-1	-	999	FIG01046298: hypothetical protein	- none -		locus|R51_00646		IM (inner membrane)	C:plasma membrane	InnerMembrane	CytoplasmicMembrane			0.557572	9
633	CDS	R51_1	654676	653552	90.9091	-1	-	1125	FIG074102: hypothetical protein	- none -		locus|R51_00647		unknown	C:cytoplasm	Periplasmic	Unknown			0.418488	0
634	CDS	R51_1	654812	656368	98.0307	2	+	1557	5&#39;-nucleotidase (EC 3.1.3.5)	Purine conversions; <br>pyrimidine conversions		locus|R51_00648		OM (Outer Membrane)	C:extracellular space	Periplasmic	Periplasmic	SP		0.423587	0
635	CDS	R51_1	656633	657871	90.9091	2	+	1239	Serine hydroxymethyltransferase (EC 2.1.2.1)	5-FCL-like protein; <br>Glycine Biosynthesis; <br>Glycine and Serine Utilization; <br>Serine-glyoxylate cycle; <br>Serine Biosynthesis; <br>YrdC-YciO-Sua5 protein family		locus|R51_00649		unknown	C:cytoplasm	Cytoplasmic	Cytoplasmic			0.268254	0
636	CDS	R51_1	657868	658944	90.8862	1	+	1077	Alanine racemase (EC 5.1.1.1)	Alanine biosynthesis; <br>Pyruvate Alanine Serine Interconversions		locus|R51_00650		P (Periplasm)	C:cytoplasm	InnerMembrane	CytoplasmicMembrane			0.337331	0
637	CDS	R51_1	660370	658889	90.4053	-1	-	1482	Transcriptional regulator, GntR family / Aspartate aminotransferase (EC 2.6.1.1)	CBSS-216591.1.peg.168; <br>Glutamine, Glutamate, Aspartate and Asparagine Biosynthesis; <br>Threonine and Homoserine Biosynthesis		locus|R51_00651		C (cytoplasmic)	C:cytoplasm	Cytoplasmic	Cytoplasmic			0.563218	0
638	CDS	R51_1	660649	661539	90.7717	1	+	891	5,10-methylenetetrahydrofolate reductase (EC 1.5.1.20)	5-FCL-like protein; <br>Methionine Biosynthesis; <br>One-carbon metabolism by tetrahydropterines; <br>Serine-glyoxylate cycle		locus|R51_00652		C (cytoplasmic)	C:cytoplasm	Cytoplasmic	Cytoplasmic			0.273934	0
639	CDS	R51_1	661704	663884	93.0158	3	+	2181	Catalase (EC 1.11.1.6) / Peroxidase (EC 1.11.1.7)	Oxidative stress; <br>Oxidative stress; <br>Protection from Reactive Oxygen Species; <br>Protection from Reactive Oxygen Species		locus|R51_00653		C (cytoplasmic)	C:cytoplasm	Periplasmic	Cytoplasmic		Probable ANTIGEN	0.413432	0	0.6839
640	CDS	R51_1	664565	663942	87.7948	-2	-	624	Putative periplasmic protein	- none -		locus|R51_00654		EC (Extracellular)	C:extracellular space	Periplasmic	Unknown	SP		0.452443	0
641	CDS	R51_1	665927	664824	90.9091	-2	-	1104	Glycerol dehydrogenase (EC 1.1.1.6)	Respiratory dehydrogenases 1		locus|R51_00655		C (cytoplasmic)	C:cytoplasm	Cytoplasmic	Cytoplasmic			0.447417	0
642	CDS	R51_1	666601	665939	90.8862	-1	-	663	Transaldolase (EC 2.2.1.2)	Fructose utilization; <br>Pentose phosphate pathway		locus|R51_00656		C (cytoplasmic)	C:cytoplasm	Cytoplasmic	Cytoplasmic			0.787452	0
643	CDS	R51_1	669113	666612	90.9091	-2	-	2502	Phosphoenolpyruvate-protein phosphotransferase of PTS system (EC 2.7.3.9)	Fructose utilization; <br>Mannitol Utilization		locus|R51_00657		C (cytoplasmic)	C:cytoplasm	Cytoplasmic	Cytoplasmic			0.521841	0
644	CDS	R51_1	669422	670501	90.8862	2	+	1080	PTS system, fructose-specific IIC component	- none -		locus|R51_00658		IM (inner membrane)	C:plasma membrane	InnerMembrane	CytoplasmicMembrane			0.267393	8
645	CDS	R51_1	670516	670836	86.0774	1	+	321	PTS system fructose-like IIB component 1 precursor (EC 2.7.1.69)	- none -		locus|R51_00659		C (cytoplasmic)	C:cytoplasm	Cytoplasmic	Unknown	SP		0.572728	0
646	CDS	R51_1	670935	673232	93.7028	3	+	2298	Pyruvate formate-lyase (EC 2.3.1.54)	Butanol Biosynthesis; <br>Fermentations: Mixed acid		locus|R51_00660		C (cytoplasmic)	C:cytoplasm	Cytoplasmic	Cytoplasmic			0.465947	0
647	CDS	R51_1	673198	674076	79.3909	1	+	879	Pyruvate formate-lyase activating enzyme (EC 1.97.1.4)	Fermentations: Mixed acid		locus|R51_00661		C (cytoplasmic)	C:cytoplasm	Cytoplasmic	Cytoplasmic			0.393014	0
648	CDS	R51_1	674078	674431	22.2578	2	+	354	PTS system fructose-like IIB component 2 precursor (EC 2.7.1.69)	- none -		locus|R51_00662		C (cytoplasmic)	C:cytoplasm	Cytoplasmic	Cytoplasmic	SP		0.401126	0
649	CDS	R51_1	675269	674418	89.5123	-2	-	852	Transcriptional regulator, AraC family	- none -		locus|R51_00663		C (cytoplasmic)	C:cytoplasm	Cytoplasmic	Cytoplasmic			0.23666	0
650	CDS	R51_1	675708	675430	73.5058	-3	-	279	UPF0141 membrane protein YijP possibly required for phosphoethanolamine modification of lipopolysaccharide	Lipid A modifications		locus|R51_00664		C (cytoplasmic)	C:cytoplasm	Extracellular	CytoplasmicMembrane			0.377122	0
651	CDS	R51_1	677162	675834	90.9091	-2	-	1329	UPF0141 membrane protein YijP possibly required for phosphoethanolamine modification of lipopolysaccharide	Lipid A modifications		locus|R51_00665		IM (inner membrane)	C:plasma membrane	InnerMembrane	CytoplasmicMembrane			0.292162	5
652	CDS	R51_1	680024	677373	93.8631	-2	-	2652	Phosphoenolpyruvate carboxylase (EC 4.1.1.31)	Fermentations: Mixed acid; <br>Pyruvate metabolism I: anaplerotic reactions, PEP		locus|R51_00666		C (cytoplasmic)	C:cytoplasm	Cytoplasmic	Cytoplasmic			0.387083	0
653	CDS	R51_1	681544	680393	90.9091	-1	-	1152	Acetylornithine deacetylase (EC 3.5.1.16)	Arginine Biosynthesis -- gjo; <br>Arginine Biosynthesis extended		locus|R51_00667		unknown	C:cytoplasm	Cytoplasmic	Cytoplasmic		Probable ANTIGEN	0.380462	0
654	CDS	R51_1	681633	682637	90.5885	3	+	1005	N-acetyl-gamma-glutamyl-phosphate reductase (EC 1.2.1.38)	Arginine Biosynthesis -- gjo; <br>Arginine Biosynthesis extended		locus|R51_00668		unknown	C:cytoplasm	Cytoplasmic	Cytoplasmic			0.793226	0
655	CDS	R51_1	682645	683421	90.7717	1	+	777	Acetylglutamate kinase (EC 2.7.2.8)	Arginine Biosynthesis -- gjo; <br>Arginine Biosynthesis extended		locus|R51_00669		C (cytoplasmic)	C:cytoplasm	Cytoplasmic	Cytoplasmic			0.284243	0
656	CDS	R51_1	683539	684915	92.054	1	+	1377	Argininosuccinate lyase (EC 4.3.2.1)	Arginine Biosynthesis -- gjo; <br>Arginine Biosynthesis extended		locus|R51_00670		C (cytoplasmic)	C:cytoplasm	Cytoplasmic	Cytoplasmic			0.346896	0
657	CDS	R51_1	685199	686116	90.4511	2	+	918	Hydrogen peroxide-inducible genes activator	LysR-family proteins in Escherichia coli; <br>LysR-family proteins in Salmonella enterica Typhimurium; <br>Oxidative stress; <br>Thioredoxin-disulfide reductase		locus|R51_00671		C (cytoplasmic)	C:cytoplasm	Cytoplasmic	Cytoplasmic			0.297808	0
658	CDS	R51_1	687499	686099	90.9091	-1	-	1401	Soluble pyridine nucleotide transhydrogenase (EC 1.6.1.1)	Phosphate metabolism		locus|R51_00672		C (cytoplasmic)	C:cytoplasm	Cytoplasmic	Cytoplasmic			0.259721	0
659	CDS	R51_1	687698	688333	84.3142	2	+	636	Unsaturated fatty acid biosythesis repressor FabR, TetR family	- none -		locus|R51_00673		C (cytoplasmic)	C:cytoplasm	Cytoplasmic	Cytoplasmic			0.512558	0
660	CDS	R51_1	688349	688708	34.463	2	+	360	Putative inner membrane protein	- none -		locus|R51_00674		IM (inner membrane)	C:plasma membrane	InnerMembrane	CytoplasmicMembrane			0.247532	3
661	CDS	R51_1	689855	688755	90.9091	-2	-	1101	tRNA (uracil(54)-C5)-methyltransferase (EC 2.1.1.35)	RNA methylation; <br>tRNA modification Archaea; <br>tRNA modification Bacteria		locus|R51_00675		C (cytoplasmic)	C:cytoplasm	Cytoplasmic	Cytoplasmic			0.337919	0
1928	CDS	R51_1	2020116	2020631	93.8631	3	+	516	Outer membrane protein X precursor	- none -		locus|R51_01970		OM (Outer Membrane)	C:outer membrane	OuterMembrane	OuterMembrane	SP	Probable ANTIGEN	0.551468	1	0.4122
663	CDS	R51_1	692018	692869	86.398	2	+	852	Glutamate racemase (EC 5.1.1.3)	Glutamine, Glutamate, Aspartate and Asparagine Biosynthesis; <br>Peptidoglycan Biosynthesis		locus|R51_00677		C (cytoplasmic)	C:cytoplasm	Cytoplasmic	Cytoplasmic			0.289286	0
664	CDS	R51_1	699209	698775	75.6125	-2	-	435	Putative acetyltransferase	- none -		locus|R51_00683		C (cytoplasmic)	C:cytoplasm	Cytoplasmic	Cytoplasmic			0.366781	0
665	CDS	R51_1	699369	700298	90.7946	3	+	930	Homoserine O-succinyltransferase (EC 2.3.1.46)	Methionine Biosynthesis		locus|R51_00684		C (cytoplasmic)	C:cytoplasm	Cytoplasmic	Cytoplasmic			0.496686	0
666	CDS	R51_1	700567	702168	93.1303	1	+	1602	Malate synthase (EC 2.3.3.9)	Glyoxylate bypass; <br>Glyoxylate bypass cluster		locus|R51_00685		C (cytoplasmic)	C:cytoplasm	Cytoplasmic	Cytoplasmic			0.368003	0
667	CDS	R51_1	702200	703504	94.8019	2	+	1305	Isocitrate lyase (EC 4.1.3.1)	Glyoxylate bypass; <br>Glyoxylate bypass cluster; <br>Serine-glyoxylate cycle		locus|R51_00686		C (cytoplasmic)	C:cytoplasm	Cytoplasmic	Cytoplasmic			0.253559	0
668	CDS	R51_1	703606	705357	90.932	1	+	1752	Isocitrate dehydrogenase phosphatase (EC 2.7.11.5)/kinase (EC 3.1.3.-)	Glyoxylate bypass; <br>Glyoxylate bypass cluster		locus|R51_00687		C (cytoplasmic)	C:cytoplasm	Cytoplasmic	Cytoplasmic			0.393571	0
669	CDS	R51_1	705755	705321	51.8434	-2	-	435	hypothetical protein	- none -		locus|R51_00688		C (cytoplasmic)	C:cytoplasm	Cytoplasmic	Unknown			0.2568	0
670	CDS	R51_1	706563	705739	82.986	-3	-	825	Acetate operon repressor	- none -		locus|R51_00689		EC (Extracellular)	C:cytoplasm	Cytoplasmic	Cytoplasmic			0.366684	0
671	CDS	R51_1	706867	710550	98.2368	1	+	3684	5-methyltetrahydrofolate--homocysteine methyltransferase (EC 2.1.1.13)	Methionine Biosynthesis		locus|R51_00690		C (cytoplasmic)	C:cytoplasm	Cytoplasmic	Cytoplasmic			0.514714	0
672	CDS	R51_1	710817	712448	90.9091	3	+	1632	Sodium-dependent phosphate transporter	NhaA, NhaD and Sodium-dependent phosphate transporters; <br>Phosphate metabolism		locus|R51_00691		IM (inner membrane)	C:plasma membrane	InnerMembrane	CytoplasmicMembrane			0.581795	8
673	CDS	R51_1	713212	712508	90.2908	-1	-	705	Alpha-aspartyl dipeptidase Peptidase E (EC 3.4.13.21)	Dipeptidases (EC 3.4.13.-)		locus|R51_00692		C (cytoplasmic)	C:cytoplasm	Cytoplasmic	Cytoplasmic			0.516984	0
674	CDS	R51_1	713420	713959	90.9091	2	+	540	Nucleoprotein/polynucleotide-associated enzyme	- none -		locus|R51_00693		C (cytoplasmic)	C:cytoplasm	Cytoplasmic	Cytoplasmic			0.435957	0
675	CDS	R51_1	714006	714875	90.8862	3	+	870	Ribosomal large subunit pseudouridine synthase F (EC 4.2.1.70)	RNA pseudouridine syntheses		locus|R51_00694		C (cytoplasmic)	C:cytoplasm	Cytoplasmic	Cytoplasmic			0.397013	0
676	CDS	R51_1	715144	714872	45.134	-1	-	273	hypothetical protein	- none -		locus|R51_00695		C (cytoplasmic)	C:cytoplasm	Cytoplasmic	Unknown			0.411249	0
677	CDS	R51_1	715965	715207	90.7946	-3	-	759	Transcriptional repressor of the fructose operon, DeoR family	Fructose utilization		locus|R51_00696		C (cytoplasmic)	C:cytoplasm	Cytoplasmic	Cytoplasmic			0.572993	0
678	CDS	R51_1	716815	715952	76.7117	-1	-	864	FIG01045341: hypothetical protein	- none -		locus|R51_00697		C (cytoplasmic)	C:cytoplasm	Cytoplasmic	Unknown			0.926192	0
679	CDS	R51_1	717671	716832	90.9091	-2	-	840	FIG01045250: hypothetical protein	- none -		locus|R51_00698		C (cytoplasmic)	C:cytoplasm	Cytoplasmic	Cytoplasmic			0.816293	0
680	CDS	R51_1	719284	717695	90.9091	-1	-	1590	Putative membrane protein	- none -		locus|R51_00699		IM (inner membrane)	C:plasma membrane	InnerMembrane	CytoplasmicMembrane			0.639224	8
681	CDS	R51_1	720441	719713	90.9091	-3	-	729	putative cytoplasmic protein	- none -		locus|R51_00700		unknown	C:cytoplasm	Periplasmic	Unknown			0.550402	0
682	CDS	R51_1	721435	721052	79.1619	-1	-	384	Serine acetyltransferase (EC 2.3.1.30)	Cysteine Biosynthesis; <br>Methionine Biosynthesis		locus|R51_00701		EC (Extracellular)	C:cytoplasm	Cytoplasmic	Cytoplasmic		Probable ANTIGEN	0.34673	0
683	CDS	R51_1	721885	722232	67.2315	1	+	348	putative cytoplasmic protein	- none -		locus|R51_00702		C (cytoplasmic)	C:cytoplasm	Cytoplasmic	Unknown			0.447473	0
684	CDS	R51_1	723712	722363	90.9091	-1	-	1350	Aspartokinase (EC 2.7.2.4)	CBSS-216591.1.peg.168; <br>Lysine Biosynthesis DAP Pathway; <br>Lysine Biosynthesis DAP Pathway, GJO scratch; <br>Threonine and Homoserine Biosynthesis		locus|R51_00703		unknown	C:cytoplasm	Cytoplasmic	Cytoplasmic			0.576136	0
685	CDS	R51_1	724100	725749	95.8553	2	+	1650	Glucose-6-phosphate isomerase (EC 5.3.1.9)	Glycolysis and Gluconeogenesis		locus|R51_00704		IM (inner membrane)	C:cytoplasm	Cytoplasmic	Cytoplasmic			0.677406	0
686	CDS	R51_1	726190	726435	90.9091	1	+	246	YjbE secreted protein	YjbEFGH Locus Involved in Exopolysaccharide Production		locus|R51_00705		EC (Extracellular)	C:extracellular space	Extracellular	Extracellular	SP		0.359332	1
2051	CDS	R51_1	2159692	2161542	92.3059	1	+	1851	L,D-transpeptidase YcbB	CBSS-228400.4.peg.1623; <br>Peptidoglycan Crosslinking of Peptide Stems		locus|R51_02094		EC (Extracellular)	C:extracellular space	Periplasmic	Periplasmic	SP	Probable ANTIGEN	0.599576	0	0.4917
688	CDS	R51_1	727134	727871	90.0389	3	+	738	YjbG polysaccharide synthesis-related protein	YjbEFGH Locus Involved in Exopolysaccharide Production		locus|R51_00707		P (Periplasm)	C:extracellular space	Periplasmic	CytoplasmicMembrane	SP		0.847988	1
2133	CDS	R51_1	2248293	2249435	96.8857	3	+	1143	Sialic acid-induced transmembrane protein YjhT(NanM), possible mutarotase	Sialic Acid Metabolism		locus|R51_02177		EC (Extracellular)	C:extracellular space	Extracellular	Unknown	SP	Probable ANTIGEN	0.820065	0	0.6329	0.967033
690	CDS	R51_1	730110	730520	13.3272	3	+	411	PsiE protein	- none -		locus|R51_00709		IM (inner membrane)	C:plasma membrane	InnerMembrane	CytoplasmicMembrane			0.400243	4
691	CDS	R51_1	731576	730686	82.2304	-2	-	891	Maltose/maltodextrin ABC transporter, permease protein MalG	Maltose and Maltodextrin Utilization		locus|R51_00710		IM (inner membrane)	C:plasma membrane	InnerMembrane	CytoplasmicMembrane			0.266225	6
692	CDS	R51_1	733135	731591	90.9091	-1	-	1545	Maltose/maltodextrin ABC transporter, permease protein MalF	Maltose and Maltodextrin Utilization		locus|R51_00711		IM (inner membrane)	C:plasma membrane	InnerMembrane	CytoplasmicMembrane			0.522941	8
693	CDS	R51_1	734457	733267	91.9853	-3	-	1191	Maltose/maltodextrin ABC transporter, substrate binding periplasmic protein MalE	Alpha-Amylase locus in Streptocococcus; <br>Bacterial Chemotaxis; <br>Maltose and Maltodextrin Utilization		locus|R51_00712		P (Periplasm)	C:extracellular space	Periplasmic	Periplasmic	SP		0.268924	1
694	CDS	R51_1	734819	735928	90.8862	2	+	1110	Maltose/maltodextrin transport ATP-binding protein MalK (EC 3.6.3.19)	Maltose and Maltodextrin Utilization		locus|R51_00713		C (cytoplasmic)	C:cytoplasm	Cytoplasmic	CytoplasmicMembrane			0.421222	0
2134	CDS	R51_1	2249481	2250173	93.1074	3	+	693	N-acetylneuraminic acid outer membrane channel protein NanC	Sialic Acid Metabolism		locus|R51_02178		OM (Outer Membrane)	C:extracellular space	OuterMembrane	OuterMembrane	SP	Probable ANTIGEN	0.726601	0	0.5398	0.994505
2314	CDS	R51_1	2423619	2423170	90.9091	-3	-	450	FIG00545237: hypothetical protein	- none -		locus|R51_02362		OM (Outer Membrane)	C:cytoplasm	Extracellular	Extracellular	SP	Probable ANTIGEN	0.715502	1	0.487
697	CDS	R51_1	738637	739134	85.3217	1	+	498	Chorismate--pyruvate lyase (EC 4.1.3.40)	Ubiquinone Biosynthesis; <br>Ubiquinone Biosynthesis - gjo		locus|R51_00716		C (cytoplasmic)	C:cytoplasm	Cytoplasmic	Cytoplasmic			0.640979	0
698	CDS	R51_1	739148	740020	82.4136	2	+	873	4-hydroxybenzoate polyprenyltransferase (EC 2.5.1.39)	Ubiquinone Biosynthesis; <br>Ubiquinone Biosynthesis - gjo		locus|R51_00717		IM (inner membrane)	C:plasma membrane	InnerMembrane	CytoplasmicMembrane			0.266628	7
699	CDS	R51_1	742539	740119	91.848	-3	-	2421	Glycerol-3-phosphate acyltransferase (EC 2.3.1.15)	Glycerolipid and Glycerophospholipid Metabolism in Bacteria		locus|R51_00718		C (cytoplasmic)	C:cytoplasm	InnerMembrane	CytoplasmicMembrane			0.377769	0
700	CDS	R51_1	742710	743078	15.7774	3	+	369	Diacylglycerol kinase (EC 2.7.1.107)	Glycerolipid and Glycerophospholipid Metabolism in Bacteria; <br>Riboflavin synthesis cluster		locus|R51_00719		IM (inner membrane)	C:plasma membrane	InnerMembrane	CytoplasmicMembrane			0.453137	2
701	CDS	R51_1	743187	743795	90.4511	3	+	609	SOS-response repressor and protease LexA (EC 3.4.21.88)	DNA repair, bacterial; <br>DNA repair, bacterial UmuCD system		locus|R51_00720		C (cytoplasmic)	C:cytoplasm	Cytoplasmic	Cytoplasmic			0.275929	0
702	CDS	R51_1	743974	745299	89.2375	1	+	1326	DNA-damage-inducible protein F	- none -		locus|R51_00721		IM (inner membrane)	C:plasma membrane	InnerMembrane	CytoplasmicMembrane			0.293895	12
703	CDS	R51_1	745428	745640	84.1081	3	+	213	UPF0337 protein yjbJ	- none -		locus|R51_00722		C (cytoplasmic)	C:cytoplasm	Cytoplasmic	Unknown			0.286375	0
704	CDS	R51_1	746254	745739	82.2075	-1	-	516	Zinc uptake regulation protein ZUR	Glycyl-tRNA synthetase containing cluster; <br>Oxidative stress; <br>Zinc regulated enzymes		locus|R51_00723		C (cytoplasmic)	C:cytoplasm	Cytoplasmic	Cytoplasmic			0.598876	0
2341	CDS	R51_1	2446212	2446454	71.3762	3	+	243	FIG01046172: hypothetical protein	- none -		locus|R51_02389		P (Periplasm)	C:extracellular space	Periplasmic	Unknown	SP	Probable ANTIGEN	0.640746	0	0.5611	0.972527
706	CDS	R51_1	747899	748897	90.9091	2	+	999	tRNA dihydrouridine synthase A (EC 1.-.-.-)	tRNA modification Bacteria		locus|R51_00725		C (cytoplasmic)	C:cytoplasm	Cytoplasmic	Cytoplasmic			0.604977	0
707	CDS	R51_1	749065	749307	20.403	1	+	243	Phage shock protein G	- none -		locus|R51_00726		IM (inner membrane)	C:plasma membrane	InnerMembrane	CytoplasmicMembrane			0.362292	2
708	CDS	R51_1	750465	749482	91.0007	-3	-	984	Quinone oxidoreductase (EC 1.6.5.5)	Quinone oxidoreductase family		locus|R51_00727		unknown	C:cytoplasm	Cytoplasmic	Cytoplasmic			0.621988	0
709	CDS	R51_1	750530	751945	92.7181	2	+	1416	Replicative DNA helicase (EC 3.6.1.-)	- none -		locus|R51_00728		C (cytoplasmic)	C:cytoplasm	Cytoplasmic	Cytoplasmic			0.273007	0
710	CDS	R51_1	751977	753056	90.1992	3	+	1080	Alanine racemase (EC 5.1.1.1)	Alanine biosynthesis; <br>Pyruvate Alanine Serine Interconversions		locus|R51_00729		C (cytoplasmic)	C:cytoplasm	Cytoplasmic	Cytoplasmic			0.732552	0
711	CDS	R51_1	753242	754435	90.9091	2	+	1194	Biosynthetic Aromatic amino acid aminotransferase alpha (EC 2.6.1.57)	Phenylalanine and Tyrosine Branches from Chorismate		locus|R51_00730		C (cytoplasmic)	C:cytoplasm	Cytoplasmic	Cytoplasmic			0.502453	0
2566	CDS	R51_1	2669380	2668970	90.9091	-1	-	411	Heat shock protein hslJ	- none -		locus|R51_02615		P (Periplasm)	C:extracellular space	Extracellular	Unknown	SP	Probable ANTIGEN	0.513374	0	0.6108	0.994505
713	CDS	R51_1	755464	755880	49.8512	1	+	417	FIG004064: hypothetical protein	CBSS-83333.1.peg.3966		locus|R51_00732		C (cytoplasmic)	C:cytoplasm	Cytoplasmic	Unknown			0.43103	0
714	CDS	R51_1	755883	756239	83.4211	3	+	357	Protein yjbR	CBSS-83333.1.peg.3966		locus|R51_00733		C (cytoplasmic)	C:cytoplasm	Periplasmic	Unknown			0.451416	0
715	CDS	R51_1	756578	756240	17.1514	-2	-	339	Putative inner membrane protein	- none -		locus|R51_00734		C (cytoplasmic)	C:cytoplasm	Cytoplasmic	Unknown			0.91894	0
716	CDS	R51_1	757008	756565	62.583	-3	-	444	Putative outer membrane lipoprotein	- none -		locus|R51_00735		OM (Outer Membrane)	C:extracellular space	Periplasmic	Unknown	SP		0.283977	0
717	CDS	R51_1	759977	757152	95.6034	-2	-	2826	Excinuclease ABC subunit A	DNA repair, UvrABC system		locus|R51_00736		C (cytoplasmic)	C:cytoplasm	Cytoplasmic	Cytoplasmic			0.463484	0
718	CDS	R51_1	760225	760755	90.9091	1	+	531	Single-stranded DNA-binding protein	DNA repair, bacterial; <br>DNA repair, bacterial RecFOR pathway		locus|R51_00737		P (Periplasm)	C:outer membrane	Periplasmic	Cytoplasmic		Probable ANTIGEN	0.362322	0
719	CDS	R51_1	761796	762428	90.8633	3	+	633	Putative inner membrane or exported protein	- none -		locus|R51_00738		OM (Outer Membrane)	C:plasma membrane	Extracellular	Unknown		Probable ANTIGEN	0.282038	1
720	CDS	R51_1	762425	763813	90.9091	2	+	1389	FIG00732228: membrane protein	- none -		locus|R51_00739		IM (inner membrane)	C:plasma membrane	OuterMembrane	CytoplasmicMembrane			0.235385	4
721	CDS	R51_1	763803	765122	98.0078	3	+	1320	Agglutination protein	- none -		locus|R51_00740		OM (Outer Membrane)	C:outer membrane	OuterMembrane	OuterMembrane	SP		0.36681	0
722	CDS	R51_1	765119	766396	95.1454	2	+	1278	Putative type-I secretion protein	- none -		locus|R51_00741		IM (inner membrane)	C:plasma membrane	Cytoplasmic	CytoplasmicMembrane			0.409838	1
723	CDS	R51_1	766413	783092	98.1681	3	+	16680	T1SS secreted agglutinin RTX	Type I secretion system for aggregation		locus|R51_00742		EC (Extracellular)	C:cytoplasm	Extracellular	Unknown		Probable ANTIGEN	0.307066	0
724	CDS	R51_1	783132	785198	90.9091	3	+	2067	Putative type-1 secretion protein	- none -		locus|R51_00743		IM (inner membrane)	C:plasma membrane	OuterMembrane	CytoplasmicMembrane			0.328505	5
725	CDS	R51_1	785757	785476	33.8218	-3	-	282	YjcB protein	- none -		locus|R51_00744		IM (inner membrane)	C:plasma membrane	InnerMembrane	CytoplasmicMembrane			0.368434	2
726	CDS	R51_1	786319	787920	90.932	1	+	1602	FIG00638940: hypothetical protein	- none -		locus|R51_00745		IM (inner membrane)	C:plasma membrane	InnerMembrane	CytoplasmicMembrane			0.38919	2
727	CDS	R51_1	788231	787908	79.7573	-2	-	324	Regulatory protein SoxS	Commensurate regulon activation; <br>Oxidative stress		locus|R51_00746		C (cytoplasmic)	C:cytoplasm	Cytoplasmic	Cytoplasmic			0.438183	0
728	CDS	R51_1	788318	788776	77.9482	2	+	459	Redox-sensitive transcriptional activator SoxR	Oxidative stress		locus|R51_00747		C (cytoplasmic)	C:cytoplasm	Cytoplasmic	Cytoplasmic			0.37417	0
729	CDS	R51_1	789069	789737	83.7417	3	+	669	Glutathione S-transferase (EC 2.5.1.18)	Glutathione: Non-redox reactions		locus|R51_00748		C (cytoplasmic)	C:cytoplasm	Cytoplasmic	Cytoplasmic			0.283287	0
730	CDS	R51_1	790085	791434	88.1612	2	+	1350	Guanine-hypoxanthine permease	Purine Utilization		locus|R51_00749		IM (inner membrane)	C:plasma membrane	InnerMembrane	CytoplasmicMembrane			0.464333	12
731	CDS	R51_1	791542	793230	90.9091	1	+	1689	Putative Na(+)/H(+) exchanger protein, CPA1 family precursor	- none -		locus|R51_00750		IM (inner membrane)	C:plasma membrane	InnerMembrane	CytoplasmicMembrane			0.615156	10
732	CDS	R51_1	794212	793325	79.6886	-1	-	888	LysR family regulatory protein CidR	Murein hydrolase regulation and cell death		locus|R51_00751		C (cytoplasmic)	C:cytoplasm	InnerMembrane	Cytoplasmic			0.427809	0
733	CDS	R51_1	794316	794726	14.0371	3	+	411	Holin-like protein CidA	Murein hydrolase regulation and cell death		locus|R51_00752		IM (inner membrane)	C:plasma membrane	InnerMembrane	CytoplasmicMembrane			0.357668	4
734	CDS	R51_1	794719	795408	53.1257	1	+	690	CidA-associated membrane protein CidB	Murein hydrolase regulation and cell death		locus|R51_00753		IM (inner membrane)	C:plasma membrane	InnerMembrane	CytoplasmicMembrane			0.385282	6
735	CDS	R51_1	797096	795447	90.9091	-2	-	1650	Acetate permease ActP (cation/acetate symporter)	Pyruvate metabolism II: acetyl-CoA, acetogenesis from pyruvate		locus|R51_00754		IM (inner membrane)	C:plasma membrane	InnerMembrane	CytoplasmicMembrane	SP		0.491805	13
736	CDS	R51_1	797407	797093	13.9226	-1	-	315	Putative membrane protein, clustering with ActP	Pyruvate metabolism II: acetyl-CoA, acetogenesis from pyruvate		locus|R51_00755		IM (inner membrane)	C:plasma membrane	InnerMembrane	CytoplasmicMembrane			0.338023	2
737	CDS	R51_1	799611	797653	93.3822	-3	-	1959	Acetyl-coenzyme A synthetase (EC 6.2.1.1)	Pyruvate metabolism II: acetyl-CoA, acetogenesis from pyruvate		locus|R51_00756		C (cytoplasmic)	C:cytoplasm	Cytoplasmic	Cytoplasmic			0.788185	0
738	CDS	R51_1	800043	801479	92.3059	3	+	1437	Cytochrome c552 precursor (EC 1.7.2.2)	Nitrate and nitrite ammonification; <br>Soluble cytochromes and functionally related electron carriers		locus|R51_00757		C (cytoplasmic)	C:extracellular space	Periplasmic	Periplasmic	SP		0.389006	0
739	CDS	R51_1	801591	802157	90.9091	3	+	567	Cytochrome c-type protein NrfB precursor	Nitrate and nitrite ammonification		locus|R51_00758		P (Periplasm)	C:extracellular space	Periplasmic	Periplasmic	SP		0.637857	0
2684	CDS	R51_1	2797145	2796027	98.855	-2	-	1119	Outer membrane protein C precursor	- none -		locus|R51_02733		OM (Outer Membrane)	C:extracellular space	OuterMembrane	OuterMembrane	SP	Probable ANTIGEN	0.597741	1	0.5512	0.994505
741	CDS	R51_1	802822	803778	70.5748	1	+	957	NrfD protein	Nitrate and nitrite ammonification		locus|R51_00760		IM (inner membrane)	C:plasma membrane	InnerMembrane	CytoplasmicMembrane			0.280144	8
742	CDS	R51_1	803771	805465	90.9091	2	+	1695	Cytochrome c-type heme lyase subunit nrfE, nitrite reductase complex assembly	Nitrate and nitrite ammonification		locus|R51_00761		IM (inner membrane)	C:plasma membrane	InnerMembrane	CytoplasmicMembrane			0.79805	13
743	CDS	R51_1	805458	806585	90.9091	3	+	1128	Cytochrome c-type heme lyase subunit nrfG, nitrite reductase complex assembly	Nitrate and nitrite ammonification		locus|R51_00762		IM (inner membrane)	C:plasma membrane	InnerMembrane	CytoplasmicMembrane			0.345261	3
744	CDS	R51_1	806930	808240	90.9091	2	+	1311	Glutamate-aspartate carrier protein	Glutamate and Aspartate uptake in Bacteria		locus|R51_00763		IM (inner membrane)	C:plasma membrane	InnerMembrane	CytoplasmicMembrane			0.314288	8
745	CDS	R51_1	809087	808398	92.8555	-2	-	690	FIG01200701: possible membrane protein	- none -		locus|R51_00764		P (Periplasm)	C:extracellular space	Periplasmic	Unknown	SP		0.272074	0
746	CDS	R51_1	810943	809264	91.7106	-1	-	1680	Formate dehydrogenase H (EC 1.2.1.2) @ selenocysteine-containing	Formate dehydrogenase; <br>Selenocysteine metabolism		locus|R51_00765		C (cytoplasmic)	C:cytoplasm	Cytoplasmic	Cytoplasmic			0.325198	0
2774	CDS	R51_1	2887295	2886774	94.4355	-2	-	522	Superoxide dismutase [Cu-Zn] precursor (EC 1.15.1.1)	Oxidative stress; <br>Protection from Reactive Oxygen Species		locus|R51_02823		P (Periplasm)	C:extracellular space	Periplasmic	Periplasmic	SP	Probable ANTIGEN	0.559866	0	0.8622	0.989011
748	CDS	R51_1	812674	811766	90.9091	-1	-	909	Fe(2+)/alpha-ketoglutarate-dependent dioxygenase LpxO	Lipid A modifications		locus|R51_00767		IM (inner membrane)	C:plasma membrane	InnerMembrane	CytoplasmicMembrane			0.425556	2
749	CDS	R51_1	813366	812932	68.1246	-3	-	435	PhnO protein	Alkylphosphonate utilization		locus|R51_00768		C (cytoplasmic)	C:cytoplasm	Cytoplasmic	Unknown			0.375602	0
750	CDS	R51_1	813961	813518	90.9091	-1	-	444	PhnB protein; putative DNA binding 3-demethylubiquinone-9 3-methyltransferase domain protein	Alkylphosphonate utilization		locus|R51_00769		P (Periplasm)	C:cytoplasm	Periplasmic	Unknown		Probable ANTIGEN	0.415711	0
751	CDS	R51_1	814416	814081	64.8958	-3	-	336	Alkylphosphonate utilization operon protein PhnA	Alkylphosphonate utilization		locus|R51_00770		C (cytoplasmic)	C:cytoplasm	Cytoplasmic	Unknown		Probable ANTIGEN	0.331429	0
752	CDS	R51_1	814884	816386	90.932	3	+	1503	L-Proline/Glycine betaine transporter ProP	Proline, 4-hydroxyproline uptake and utilization		locus|R51_00771		IM (inner membrane)	C:plasma membrane	InnerMembrane	CytoplasmicMembrane			0.340974	12
753	CDS	R51_1	816456	816545	30.3183	3	+	90	hypothetical protein	- none -		locus|R51_00772		unknown		Cytoplasmic	Unknown			0.4664	1
754	CDS	R51_1	817632	816553	90.6572	-3	-	1080	Sensor protein basS/pmrB (EC 2.7.3.-)	Lipid A modifications; <br>Orphan regulatory proteins		locus|R51_00773		IM (inner membrane)	C:plasma membrane	InnerMembrane	CytoplasmicMembrane			0.495592	2
755	CDS	R51_1	818301	817633	90.1534	-3	-	669	Transcriptional regulatory protein basR/pmrA	Lipid A modifications; <br>Orphan regulatory proteins		locus|R51_00774		C (cytoplasmic)	C:cytoplasm	Cytoplasmic	Cytoplasmic			0.439683	0
756	CDS	R51_1	819941	818298	90.9091	-2	-	1644	Phosphoethanolamine transferase EptA specific for the 1 phosphate group of core-lipid A	Lipid A modifications		locus|R51_00775		IM (inner membrane)	C:plasma membrane	InnerMembrane	CytoplasmicMembrane			0.486028	5
757	CDS	R51_1	821412	820075	90.9091	-3	-	1338	Arginine/agmatine antiporter	Arginine and Ornithine Degradation; <br>Polyamine Metabolism		locus|R51_00776		IM (inner membrane)	C:plasma membrane	InnerMembrane	CytoplasmicMembrane			0.419092	11
758	CDS	R51_1	822313	821552	90.9091	-1	-	762	Transcriptional regulator of catabolic arginine decarboxylase (adiA)	Arginine and Ornithine Degradation; <br>Polyamine Metabolism		locus|R51_00777		unknown	C:cytoplasm	Cytoplasmic	Cytoplasmic			0.425718	0
759	CDS	R51_1	824878	822611	94.0463	-1	-	2268	Arginine decarboxylase, catabolic (EC 4.1.1.19)	Arginine and Ornithine Degradation; <br>Polyamine Metabolism		locus|R51_00778		C (cytoplasmic)	C:cytoplasm	Periplasmic	Cytoplasmic			0.364432	0
760	CDS	R51_1	826040	825108	85.6423	-2	-	933	Melibiose operon regulatory protein	Melibiose Utilization		locus|R51_00779		C (cytoplasmic)	C:cytoplasm	Periplasmic	CytoplasmicMembrane			0.32519	0
761	CDS	R51_1	826312	827664	90.9091	1	+	1353	Alpha-galactosidase (EC 3.2.1.22)	Lactose and Galactose Uptake and Utilization; <br>Melibiose Utilization		locus|R51_00780		C (cytoplasmic)	C:cytoplasm	Cytoplasmic	Cytoplasmic			0.342548	0
762	CDS	R51_1	827748	828662	90.1992	3	+	915	Melibiose carrier protein, Na+/melibiose symporter	Melibiose Utilization		locus|R51_00781		IM (inner membrane)	C:plasma membrane	InnerMembrane	CytoplasmicMembrane			0.356704	7
763	CDS	R51_1	828717	829124	46.3476	3	+	408	Melibiose carrier protein, Na+/melibiose symporter	Melibiose Utilization		locus|R51_00782		IM (inner membrane)	C:plasma membrane	InnerMembrane	CytoplasmicMembrane			0.462902	2
764	CDS	R51_1	830868	829222	96.8628	-3	-	1647	Fumarate hydratase class I, anaerobic (EC 4.2.1.2)	Fumarate respiration cluster; <br>Serine-glyoxylate cycle		locus|R51_00783		C (cytoplasmic)	C:cytoplasm	Periplasmic	Cytoplasmic		Probable ANTIGEN	0.457517	0
765	CDS	R51_1	832304	830964	90.9091	-2	-	1341	C4-dicarboxylate transporter DcuB	Fumarate respiration cluster		locus|R51_00784		IM (inner membrane)	C:plasma membrane	InnerMembrane	CytoplasmicMembrane			0.856348	11
766	CDS	R51_1	832717	832451	25.0057	-1	-	267	FIG01045654: hypothetical protein	- none -		locus|R51_00785		C (cytoplasmic)	C:cytoplasm	Cytoplasmic	Unknown		Probable ANTIGEN	0.41048	0
767	CDS	R51_1	833753	833034	88.2757	-2	-	720	Fumarate respiration transcriptional regulator DcuR	Fumarate respiration cluster		locus|R51_00786		C (cytoplasmic)	C:cytoplasm	Cytoplasmic	Cytoplasmic			0.668615	0
768	CDS	R51_1	835381	833750	92.741	-1	-	1632	Fumarate respiration sensor kinase protein DcuS	Fumarate respiration cluster		locus|R51_00787		IM (inner membrane)	C:plasma membrane	InnerMembrane	CytoplasmicMembrane			0.402411	2
769	CDS	R51_1	835756	835848	10.442	1	+	93	hypothetical protein	- none -		locus|R51_00788		unknown		Cytoplasmic	Unknown			0.636581	0
770	CDS	R51_1	835981	837732	91.2755	1	+	1752	Anaerobic dimethyl sulfoxide reductase chain A (EC 1.8.5.3)	- none -		locus|R51_00789		C (cytoplasmic)	C:cytoplasm	Cytoplasmic	Unknown			0.252225	0
771	CDS	R51_1	837722	838024	79.1848	2	+	303	Anaerobic dimethyl sulfoxide reductase chain A (EC 1.8.99.-)	Anaerobic respiratory reductases		locus|R51_00790		C (cytoplasmic)	C:cytoplasm	Cytoplasmic	Cytoplasmic			0.343292	0
772	CDS	R51_1	838038	838664	90.9091	3	+	627	Anaerobic dimethyl sulfoxide reductase chain B (EC 1.8.5.3)	- none -		locus|R51_00791		C (cytoplasmic)	C:cytoplasm	Periplasmic	Unknown			0.48698	0
773	CDS	R51_1	838657	839430	50.0115	1	+	774	Anaerobic dimethyl sulfoxide reductase chain C (EC 1.8.5.3)	- none -		locus|R51_00792		IM (inner membrane)	C:plasma membrane	InnerMembrane	CytoplasmicMembrane			0.274163	8
774	CDS	R51_1	839505	840098	66.7964	3	+	594	Putative oxidoreductase component of anaerobic dehydrogenases; Chaperone protein TorD	trimethylamine N-oxide (TMAO) reductase		locus|R51_00793		C (cytoplasmic)	C:plasma membrane	Cytoplasmic	CytoplasmicMembrane			0.398836	0
775	CDS	R51_1	841582	840182	95.3515	-1	-	1401	Putative periplasmic or exported protein	- none -		locus|R51_00794		P (Periplasm)	C:extracellular space	Periplasmic	Unknown	SP		0.551927	0
776	CDS	R51_1	841931	842788	90.9091	2	+	858	Putative inner membrane protein	- none -		locus|R51_00795		P (Periplasm)	C:plasma membrane	Periplasmic	CytoplasmicMembrane			0.54122	1
777	CDS	R51_1	843632	843297	90.9091	-2	-	336	FIG01046611: hypothetical protein	- none -		locus|R51_00796		EC (Extracellular)	C:cytoplasm	Extracellular	Unknown		Probable ANTIGEN	0.31609	0
778	CDS	R51_1	844141	843869	57.9803	-1	-	273	Flagellar regulon repressor RtsB	Type III secretion system orphans		locus|R51_00797		C (cytoplasmic)	C:cytoplasm	Cytoplasmic	Unknown			0.292057	0
779	CDS	R51_1	845028	844153	90.9091	-3	-	876	Type III secretion and flagellar regulator RtsA	Type III secretion system orphans		locus|R51_00798		C (cytoplasmic)	C:plasma membrane	OuterMembrane	Cytoplasmic			0.364765	0
780	CDS	R51_1	845831	846124	51.7518	2	+	294	FIG032766: hypothetical protein	CBSS-374931.9.peg.1048		locus|R51_00799		C (cytoplasmic)	C:cytoplasm	Cytoplasmic	Unknown			0.384842	0
781	CDS	R51_1	846121	846612	73.2311	1	+	492	FIG001353: Acetyltransferase	CBSS-374931.9.peg.1048		locus|R51_00800		C (cytoplasmic)	C:cytoplasm	Cytoplasmic	Unknown			0.265834	0
2941	CDS	R51_1	3048025	3047279	95.9469	-1	-	747	MltA-interacting protein MipA	Unknown carbohydrate utilization ( cluster Ydj )		locus|R51_02992		OM (Outer Membrane)	C:extracellular space	OuterMembrane	OuterMembrane	SP	Probable ANTIGEN	0.54885	0	0.3669
783	CDS	R51_1	849089	848514	78.91	-2	-	576	Transcriptional regulator, TetR family	- none -		locus|R51_00803		C (cytoplasmic)	C:cytoplasm	Cytoplasmic	Cytoplasmic			0.895941	0
784	CDS	R51_1	850829	849126	90.9091	-2	-	1704	Cytochrome c-type biogenesis protein DsbD, protein-disulfide reductase (EC 1.8.1.8)	Biogenesis of c-type cytochromes; <br>Periplasmic disulfide interchange		locus|R51_00804		IM (inner membrane)	C:extracellular space	InnerMembrane	CytoplasmicMembrane	SP		0.294123	8
785	CDS	R51_1	851152	850805	73.2082	-1	-	348	Periplasmic divalent cation tolerance protein CutA	Copper homeostasis: copper tolerance		locus|R51_00805		unknown	C:cytoplasm	Cytoplasmic	Cytoplasmic			0.281717	0
786	CDS	R51_1	852574	851273	90.9091	-1	-	1302	C4-dicarboxylate transporter DcuA	- none -		locus|R51_00806		IM (inner membrane)	C:plasma membrane	InnerMembrane	CytoplasmicMembrane			0.654525	11
787	CDS	R51_1	854125	852689	90.9091	-1	-	1437	Aspartate ammonia-lyase (EC 4.3.1.1)	Glutamine, Glutamate, Aspartate and Asparagine Biosynthesis		locus|R51_00807		C (cytoplasmic)	C:cytoplasm	Cytoplasmic	Cytoplasmic			0.552837	0
788	CDS	R51_1	854427	854942	66.7964	3	+	516	FxsA protein	- none -		locus|R51_00808		IM (inner membrane)	C:plasma membrane	InnerMembrane	CytoplasmicMembrane			0.450068	3
789	CDS	R51_1	855351	855001	3.18296	-3	-	351	Putative permease	- none -		locus|R51_00809		IM (inner membrane)	C:plasma membrane	InnerMembrane	CytoplasmicMembrane			0.564438	3
790	CDS	R51_1	856262	855432	51.5686	-2	-	831	Putative permease	- none -		locus|R51_00810		IM (inner membrane)	C:plasma membrane	InnerMembrane	CytoplasmicMembrane			0.468421	7
791	CDS	R51_1	856517	856810	85.4362	2	+	294	Heat shock protein 60 family co-chaperone GroES	GroEL GroES		locus|R51_00811		C (cytoplasmic)	C:cytoplasm	Cytoplasmic	Cytoplasmic			0.426366	0
792	CDS	R51_1	856854	858500	98.4658	3	+	1647	Heat shock protein 60 family chaperone GroEL	GroEL GroES		locus|R51_00812		C (cytoplasmic)	C:cytoplasm	Cytoplasmic	Cytoplasmic		Probable ANTIGEN	0.469822	0
2980	CDS	R51_1	3081779	3082300	89.3062	2	+	522	Probable lipoprotein envE precursor	- none -		locus|R51_03033		EC (Extracellular)	C:cytoplasm	OuterMembrane	Unknown	SP	Probable ANTIGEN	0.726628	0	0.3494
794	CDS	R51_1	860002	859145	90.8175	-1	-	858	FIG00733146: hypothetical protein	- none -		locus|R51_00814		unknown	C:cytoplasm	Cytoplasmic	Cytoplasmic			0.325004	0
795	CDS	R51_1	861312	860284	90.8862	-3	-	1029	Lysyl-lysine 2,3-aminomutase	Translation elongation factor P lysylation		locus|R51_00815		C (cytoplasmic)	C:cytoplasm	Cytoplasmic	Cytoplasmic			0.416367	0
796	CDS	R51_1	861353	861919	90.9091	2	+	567	Translation elongation factor P	Translation elongation factor P lysylation; <br>Translation elongation factors bacterial		locus|R51_00816		C (cytoplasmic)	C:cytoplasm	Cytoplasmic	Cytoplasmic			0.554513	0
3017	CDS	R51_1	3121453	3121079	74.2157	-1	-	375	YcfL protein: an outer membrane lipoprotein that is part of a salvage cluster	A Cluster-Based Subsystem that is Probably a Salvage Pathway Containing Thiamin Kinase		locus|R51_03070		P (Periplasm)	C:extracellular space	Cytoplasmic	Unknown	SP	Probable ANTIGEN	0.505123	0	0.3328
798	CDS	R51_1	862937	862398	65.9263	-2	-	540	Putative luxR family bacterial regulatory protein	- none -		locus|R51_00818		unknown	C:cytoplasm	Cytoplasmic	Unknown			0.481328	0
799	CDS	R51_1	863043	862921	48.4314	-3	-	123	hypothetical protein	- none -		locus|R51_00819		unknown	C:outer membrane	Cytoplasmic	Unknown			0.296213	0
800	CDS	R51_1	863242	863559	9.43439	1	+	318	Quaternary ammonium compound-resistance protein SugE	- none -		locus|R51_00820		IM (inner membrane)	C:plasma membrane	InnerMembrane	CytoplasmicMembrane			0.243905	4
801	CDS	R51_1	864109	863576	90.9091	-1	-	534	Outer membrane lipoprotein Blc	- none -		locus|R51_00821		P (Periplasm)	C:extracellular space	Periplasmic	OuterMembrane	SP		0.268907	0
802	CDS	R51_1	864580	864221	11.4724	-1	-	360	Fumarate reductase subunit D	Succinate dehydrogenase		locus|R51_00822		IM (inner membrane)	C:plasma membrane	InnerMembrane	CytoplasmicMembrane			0.640995	3
803	CDS	R51_1	864986	864591	50.2862	-2	-	396	Fumarate reductase subunit C	Succinate dehydrogenase		locus|R51_00823		IM (inner membrane)	C:plasma membrane	InnerMembrane	CytoplasmicMembrane			0.254609	3
804	CDS	R51_1	865731	864997	90.9091	-3	-	735	Succinate dehydrogenase iron-sulfur protein (EC 1.3.99.1)	5-FCL-like protein; <br>Serine-glyoxylate cycle; <br>Succinate dehydrogenase; <br>TCA Cycle		locus|R51_00824		C (cytoplasmic)	C:cytoplasm	Periplasmic	CytoplasmicMembrane			0.349631	0
805	CDS	R51_1	867514	865724	90.9091	-1	-	1791	Succinate dehydrogenase flavoprotein subunit (EC 1.3.99.1)	Serine-glyoxylate cycle; <br>Succinate dehydrogenase; <br>TCA Cycle		locus|R51_00825		OM (Outer Membrane)	C:cytoplasm	Cytoplasmic	CytoplasmicMembrane	SP		0.454091	0
806	CDS	R51_1	867837	868814	90.9091	3	+	978	Translation elongation factor P Lys34:lysine transferase	Translation elongation factor P lysylation		locus|R51_00826		C (cytoplasmic)	C:cytoplasm	Cytoplasmic	Cytoplasmic			0.509043	0
807	CDS	R51_1	869040	870542	90.9091	3	+	1503	Putative amino acid permease	- none -		locus|R51_00827		IM (inner membrane)	C:plasma membrane	InnerMembrane	CytoplasmicMembrane			0.476551	12
808	CDS	R51_1	870594	870908	19.5558	3	+	315	FIG00639836: hypothetical protein	- none -		locus|R51_00828		IM (inner membrane)	C:plasma membrane	InnerMembrane	CytoplasmicMembrane			0.269302	3
809	CDS	R51_1	872594	870975	90.9091	-2	-	1620	Potassium efflux system KefA protein / Small-conductance mechanosensitive channel	Potassium homeostasis		locus|R51_00829		IM (inner membrane)	C:plasma membrane	InnerMembrane	CytoplasmicMembrane			0.454345	8
810	CDS	R51_1	874301	872661	94.8019	-2	-	1641	Potassium efflux system KefA protein / Small-conductance mechanosensitive channel	Potassium homeostasis		locus|R51_00830		OM (Outer Membrane)	C:extracellular space	OuterMembrane	OuterMembrane	SP		0.299182	2
811	CDS	R51_1	875288	874320	90.9091	-2	-	969	Phosphatidylserine decarboxylase (EC 4.1.1.65)	Glycerolipid and Glycerophospholipid Metabolism in Bacteria		locus|R51_00831		C (cytoplasmic)	C:cytoplasm	InnerMembrane	CytoplasmicMembrane			0.391703	0
812	CDS	R51_1	876456	875380	90.9091	-3	-	1077	Ribosome small subunit-stimulated GTPase EngC	Universal GTPases		locus|R51_00832		C (cytoplasmic)	C:cytoplasm	Cytoplasmic	Cytoplasmic			0.394095	0
813	CDS	R51_1	876539	877084	86.627	2	+	546	3&#39;-to-5&#39; oligoribonuclease (orn)	RNA processing and degradation, bacterial		locus|R51_00833		C (cytoplasmic)	C:cytoplasm	Cytoplasmic	Cytoplasmic			0.391848	0
814	CDS	R51_1	877865	877146	91.7106	-2	-	720	Arginine ABC transporter, periplasmic arginine-binding protein ArtI	Arginine and Ornithine Degradation		locus|R51_00834		C (cytoplasmic)	C:cytoplasm	Periplasmic	Periplasmic	SP		0.317759	0
815	CDS	R51_1	880109	878970	90.2908	-2	-	1140	Epoxyqueuosine (oQ) reductase QueG	Queuosine-Archaeosine Biosynthesis; <br>Scaffold proteins for [4Fe-4S] cluster assembly (MRP family)		locus|R51_00838		C (cytoplasmic)	C:cytoplasm	Cytoplasmic	Cytoplasmic			0.471226	0
816	CDS	R51_1	880111	881655	90.9091	1	+	1545	NAD(P)HX epimerase / NAD(P)HX dehydratase	YjeE; <br>YjeE		locus|R51_00839		C (cytoplasmic)	C:cytoplasm	Cytoplasmic	Unknown			0.227211	0
817	CDS	R51_1	881627	882088	73.5974	2	+	462	TsaE protein, required for threonylcarbamoyladenosine t(6)A37 formation in tRNA	Possible RNA modification and stress response cluster; <br>Scaffold proteins for [4Fe-4S] cluster assembly (MRP family); <br>YjeE; <br>YrdC-YciO-Sua5 protein family		locus|R51_00840		C (cytoplasmic)	C:cytoplasm	Cytoplasmic	Cytoplasmic			0.298538	0
3044	CDS	R51_1	3148839	3147742	90.9091	-3	-	1098	Flagellar P-ring protein FlgI	Flagellum		locus|R51_03097		P (Periplasm)	C:extracellular space	Periplasmic	Periplasmic	SP	Probable ANTIGEN	0.677885	0	0.4704
819	CDS	R51_1	883434	885290	90.9091	3	+	1857	DNA mismatch repair protein MutL	DNA repair, bacterial MutL-MutS system		locus|R51_00842		C (cytoplasmic)	C:cytoplasm	Cytoplasmic	Cytoplasmic			0.589204	0
820	CDS	R51_1	885328	886233	90.5198	1	+	906	tRNA dimethylallyltransferase (EC 2.5.1.75)	tRNA modification Bacteria; <br>tRNA processing		locus|R51_00843		C (cytoplasmic)	C:cytoplasm	Cytoplasmic	Cytoplasmic			0.480828	0
821	CDS	R51_1	886316	886624	83.1921	2	+	309	RNA-binding protein Hfq	Hfl operon; <br>Polyadenylation bacterial		locus|R51_00844		C (cytoplasmic)	C:cytoplasm	Periplasmic	Cytoplasmic		Probable ANTIGEN	0.559819	0
822	CDS	R51_1	886696	887976	91.2526	1	+	1281	GTP-binding protein HflX	Hfl operon; <br>Universal GTPases		locus|R51_00845		C (cytoplasmic)	C:cytoplasm	Cytoplasmic	Cytoplasmic			0.579645	0
823	CDS	R51_1	888191	889450	93.199	2	+	1260	HflK protein	Hfl operon; <br>Scaffold proteins for [4Fe-4S] cluster assembly (MRP family)		locus|R51_00846		IM (inner membrane)	C:plasma membrane	OuterMembrane	OuterMembrane		Probable ANTIGEN	0.654687	1	0.8111
824	CDS	R51_1	889453	890457	90.9091	1	+	1005	HflC protein	Hfl operon; <br>Scaffold proteins for [4Fe-4S] cluster assembly (MRP family)		locus|R51_00847		IM (inner membrane)	C:plasma membrane	Cytoplasmic	Cytoplasmic			0.289265	1
825	CDS	R51_1	890536	890733	13.4417	1	+	198	Putative inner membrane protein YjeT (clustered with HflC)	Hfl operon		locus|R51_00848		IM (inner membrane)	C:plasma membrane	Cytoplasmic	CytoplasmicMembrane			0.321579	2
826	CDS	R51_1	890836	892134	92.7868	1	+	1299	Adenylosuccinate synthetase (EC 6.3.4.4)	Purine conversions		locus|R51_00849		C (cytoplasmic)	C:cytoplasm	Cytoplasmic	Cytoplasmic			0.498566	0
827	CDS	R51_1	892342	892767	74.2157	1	+	426	Nitrite-sensitive transcriptional repressor NsrR	Nitrosative stress; <br>Oxidative stress; <br>Rrf2 family transcriptional regulators		locus|R51_00850		C (cytoplasmic)	C:cytoplasm	Cytoplasmic	Cytoplasmic			0.516184	0
828	CDS	R51_1	892805	895243	96.4507	2	+	2439	3&#39;-to-5&#39; exoribonuclease RNase R	RNA processing and degradation, bacterial		locus|R51_00851		C (cytoplasmic)	C:cytoplasm	Cytoplasmic	Cytoplasmic			0.487116	0
829	CDS	R51_1	895334	896065	82.4823	2	+	732	23S rRNA (guanosine-2&#39;-O-) -methyltransferase rlmB (EC 2.1.1.-)	RNA methylation		locus|R51_00852		C (cytoplasmic)	C:cytoplasm	Cytoplasmic	Cytoplasmic			0.363096	0
830	CDS	R51_1	896197	896601	80.9251	1	+	405	FIG006163: hypothetical protein	CBSS-211586.1.peg.3421		locus|R51_00853		C (cytoplasmic)	C:cytoplasm	Cytoplasmic	Unknown			0.518599	0
831	CDS	R51_1	896616	897314	90.9091	3	+	699	PspA/IM30 family protein	CBSS-211586.1.peg.3421		locus|R51_00854		C (cytoplasmic)	C:cytoplasm	Cytoplasmic	Cytoplasmic		Probable ANTIGEN	0.373117	0
832	CDS	R51_1	897314	898384	85.8255	2	+	1071	Putative potassium channel protein	- none -		locus|R51_00855		IM (inner membrane)	C:plasma membrane	InnerMembrane	CytoplasmicMembrane			0.619575	3
833	CDS	R51_1	898381	899040	62.3311	1	+	660	FIG00638518: hypothetical protein	- none -		locus|R51_00856		C (cytoplasmic)	C:cytoplasm	Cytoplasmic	Unknown			0.28498	0
834	CDS	R51_1	899058	899456	65.5599	3	+	399	Membrane protein with DUF350 domain	- none -		locus|R51_00857		IM (inner membrane)	C:plasma membrane	InnerMembrane	CytoplasmicMembrane			0.426121	4
835	CDS	R51_1	899466	900104	90.7717	3	+	639	FIG00637977: hypothetical protein	- none -		locus|R51_00858		EC (Extracellular)	C:cytoplasm	Extracellular	Unknown		Probable ANTIGEN	0.316247	0
836	CDS	R51_1	900107	901270	90.9091	2	+	1164	Similarity with glutathionylspermidine synthase (EC 6.3.1.8), group 1	Glutathionylspermidine and Trypanothione		locus|R51_00859		C (cytoplasmic)	C:cytoplasm	Cytoplasmic	Cytoplasmic			0.463131	0
837	CDS	R51_1	901355	902977	90.9091	2	+	1623	Acyl-CoA dehydrogenase (EC 1.3.8.7)	- none -		locus|R51_00860		C (cytoplasmic)	C:cytoplasm	Cytoplasmic	Cytoplasmic			0.606069	0
838	CDS	R51_1	903297	903022	65.6057	-3	-	276	Putative uncharacterized protein YjfN	- none -		locus|R51_00861		P (Periplasm)	C:cytoplasm	Cytoplasmic	CytoplasmicMembrane	SP		0.275764	0
839	CDS	R51_1	903730	903428	71.3762	-1	-	303	FIG01200701: possible membrane protein	- none -		locus|R51_00862		P (Periplasm)	C:extracellular space	Periplasmic	Unknown	SP		0.330318	0
840	CDS	R51_1	903941	904690	76.0934	2	+	750	YjfP protein	- none -		locus|R51_00863		unknown	C:cytoplasm	Cytoplasmic	Unknown			0.261481	0
841	CDS	R51_1	905442	904687	90.8404	-3	-	756	Ascorbate utilization transcriptional regulator UlaR, HTH-type	L-ascorbate utilization (and related gene clusters)		locus|R51_00864		C (cytoplasmic)	C:cytoplasm	Cytoplasmic	Cytoplasmic			0.465423	0
842	CDS	R51_1	906611	905547	90.9091	-2	-	1065	Probable L-ascorbate-6-phosphate lactonase UlaG (EC 3.1.1.-) (L-ascorbate utilization protein G)	L-ascorbate utilization (and related gene clusters)		locus|R51_00865		C (cytoplasmic)	C:cytoplasm	Periplasmic	Cytoplasmic			0.608145	0
843	CDS	R51_1	906974	908371	90.2908	2	+	1398	Ascorbate-specific PTS system, EIIC component	L-ascorbate utilization (and related gene clusters)		locus|R51_00866		IM (inner membrane)	C:plasma membrane	InnerMembrane	CytoplasmicMembrane			0.549287	10
844	CDS	R51_1	908387	908692	84.5661	2	+	306	Ascorbate-specific PTS system, EIIB component (EC 2.7.1.69)	L-ascorbate utilization (and related gene clusters)		locus|R51_00867		unknown	C:cytoplasm	Cytoplasmic	Unknown			0.421407	0
845	CDS	R51_1	908702	909166	74.8798	2	+	465	Ascorbate-specific PTS system, EIIA component (EC 2.7.1.-)	L-ascorbate utilization (and related gene clusters)		locus|R51_00868		unknown	C:cytoplasm	Cytoplasmic	CytoplasmicMembrane			0.375796	0
846	CDS	R51_1	909180	909830	83.8791	3	+	651	3-keto-L-gulonate-6-phosphate decarboxylase UlaD (EC 4.1.1.85) (L-ascorbate utilization protein D)	L-ascorbate utilization (and related gene clusters)		locus|R51_00869		C (cytoplasmic)	C:cytoplasm	Cytoplasmic	Cytoplasmic			0.392368	0
847	CDS	R51_1	909840	910694	89.9473	3	+	855	L-ribulose-5-phosphate 3-epimerase UlaE (EC 5.1.3.22) (L-ascorbate utilization protein E)	L-ascorbate utilization (and related gene clusters)		locus|R51_00870		C (cytoplasmic)	C:cytoplasm	Cytoplasmic	Cytoplasmic			0.402399	0
848	CDS	R51_1	910694	911380	83.4211	2	+	687	L-ribulose-5-phosphate 4-epimerase UlaF (EC 5.1.3.4) (L-ascorbate utilization protein F)	L-ascorbate utilization (and related gene clusters)		locus|R51_00871		C (cytoplasmic)	C:cytoplasm	Cytoplasmic	Cytoplasmic			0.307462	0
849	CDS	R51_1	911784	911509	66.8422	-3	-	276	UPF0379 protein yjfY precursor	- none -		locus|R51_00872		P (Periplasm)	C:extracellular space	Periplasmic	Unknown	SP		0.372817	0
850	CDS	R51_1	912254	912649	90.2908	2	+	396	SSU ribosomal protein S6p	Primosomal replication protein N clusters with ribosomal proteins; <br>Ribosome SSU bacterial		locus|R51_00873		C (cytoplasmic)	C:cytoplasm	Cytoplasmic	Cytoplasmic			0.620298	0
851	CDS	R51_1	912656	912970	53.6753	2	+	315	Primosomal replication protein N	Primosomal replication protein N clusters with ribosomal proteins		locus|R51_00874		C (cytoplasmic)	C:cytoplasm	Cytoplasmic	Unknown			0.268799	0
852	CDS	R51_1	912975	913202	38.1269	3	+	228	SSU ribosomal protein S18p @ SSU ribosomal protein S18p, zinc-independent	Primosomal replication protein N clusters with ribosomal proteins; <br>Ribosome SSU bacterial; <br>Ribosome SSU bacterial		locus|R51_00875		C (cytoplasmic)	C:cytoplasm	Cytoplasmic	Cytoplasmic			0.447003	0
853	CDS	R51_1	913244	913693	90.9091	2	+	450	LSU ribosomal protein L9p	Primosomal replication protein N clusters with ribosomal proteins; <br>Ribosome LSU bacterial		locus|R51_00876		C (cytoplasmic)	C:cytoplasm	Cytoplasmic	Cytoplasmic			0.425267	0
854	CDS	R51_1	913841	914767	65.8805	2	+	927	Permease of the drug/metabolite transporter (DMT) superfamily	Queuosine-Archaeosine Biosynthesis		locus|R51_00877		IM (inner membrane)	C:plasma membrane	InnerMembrane	CytoplasmicMembrane			0.548146	10
855	CDS	R51_1	915452	914817	85.4591	-2	-	636	Putative cell envelope opacity-associated protein A	- none -		locus|R51_00878		C (cytoplasmic)	C:plasma membrane	Periplasmic	CytoplasmicMembrane		Probable ANTIGEN	0.368029	0
856	CDS	R51_1	915672	916292	79.2535	3	+	621	FKBP-type peptidyl-prolyl cis-trans isomerase FklB (EC 5.2.1.8)	Peptidyl-prolyl cis-trans isomerase		locus|R51_00879		C (cytoplasmic)	C:cytoplasm	Cytoplasmic	Cytoplasmic			0.381321	0
857	CDS	R51_1	916588	917991	90.9091	1	+	1404	D-serine/D-alanine/glycine transporter	Glycine and Serine Utilization; <br>Pyruvate Alanine Serine Interconversions		locus|R51_00880		IM (inner membrane)	C:plasma membrane	InnerMembrane	CytoplasmicMembrane			0.71882	12
858	CDS	R51_1	918329	919468	90.9091	2	+	1140	FIG01200701: possible membrane protein	- none -		locus|R51_00881		P (Periplasm)	C:extracellular space	Cytoplasmic	Unknown	SP		0.394393	0
3045	CDS	R51_1	3149516	3148851	90.9091	-2	-	666	Flagellar L-ring protein FlgH	Flagellar motility; <br>Flagellum		locus|R51_03098		OM (Outer Membrane)	C:extracellular space	Extracellular	OuterMembrane	SP	Probable ANTIGEN	0.613561	0	0.4922
860	CDS	R51_1	921600	920938	90.9091	-3	-	663	Nitric oxide-dependent regulator DnrN or NorA	Nitrosative stress		locus|R51_00883		C (cytoplasmic)	C:cytoplasm	Cytoplasmic	Cytoplasmic			0.662095	0
861	CDS	R51_1	922668	921703	81.635	-3	-	966	Putative membrane protein	- none -		locus|R51_00884		IM (inner membrane)	C:plasma membrane	InnerMembrane	CytoplasmicMembrane			0.536985	10
862	CDS	R51_1	922871	922749	49.6909	-2	-	123	NADPH:quinone oxidoreductase 2	NADPH:quinone oxidoreductase 2		locus|R51_00885		unknown	C:cytoplasm	Cytoplasmic	Unknown		Probable ANTIGEN	0.322038	0
863	CDS	R51_1	923596	922931	90.9091	-1	-	666	NADPH:quinone oxidoreductase 2	NADPH:quinone oxidoreductase 2		locus|R51_00886		unknown	C:cytoplasm	Cytoplasmic	Unknown			0.33965	0
864	CDS	R51_1	923684	924070	47.0346	2	+	387	Redox-sensing transcriptional regulator QorR	NADPH:quinone oxidoreductase 2		locus|R51_00887		C (cytoplasmic)	C:cytoplasm	Cytoplasmic	Unknown			0.327231	0
865	CDS	R51_1	926071	924128	99.1756	-1	-	1944	2&#39;,3&#39;-cyclic-nucleotide 2&#39;-phosphodiesterase (EC 3.1.4.16)	Purine conversions; <br>pyrimidine conversions		locus|R51_00888		P (Periplasm)	C:extracellular space	Periplasmic	Periplasmic	SP		0.386319	0
866	CDS	R51_1	926339	927079	90.9091	2	+	741	3&#39;(2&#39;),5&#39;-bisphosphate nucleotidase (EC 3.1.3.7)	Inorganic Sulfur Assimilation		locus|R51_00889		C (cytoplasmic)	C:cytoplasm	Cytoplasmic	Cytoplasmic			0.226427	0
867	CDS	R51_1	927626	927069	90.2908	-2	-	558	Protein ytfJ precursor	- none -		locus|R51_00890		P (Periplasm)	C:extracellular space	Periplasmic	Unknown	SP		0.36889	0
868	CDS	R51_1	927953	928159	31.6922	2	+	207	FIG00614015: hypothetical protein	- none -		locus|R51_00891		C (cytoplasmic)	C:cytoplasm	Cytoplasmic	Unknown			0.682967	0
869	CDS	R51_1	929586	928243	90.9091	-3	-	1344	Putative membrane protein	- none -		locus|R51_00892		OM (Outer Membrane)	C:plasma membrane	InnerMembrane	CytoplasmicMembrane			0.258264	4
870	CDS	R51_1	930407	929769	85.8255	-2	-	639	Peptide methionine sulfoxide reductase MsrA (EC 1.8.4.11)	Cluster Ytf and putative sugar transporter; <br>Peptide methionine sulfoxide reductase; <br>Putative sugar ABC transporter (ytf cluster)		locus|R51_00893		P (Periplasm)	C:cytoplasm	Periplasmic	Unknown		Probable ANTIGEN	0.522629	0
3209	CDS	R51_1	3306962	3305946	90.9091	-2	-	1017	dTDP-glucose 4,6-dehydratase (EC 4.2.1.46)	Rhamnose containing glycans; <br>dTDP-rhamnose synthesis		locus|R51_03267		unknown	C:cytoplasm	OuterMembrane	Cytoplasmic	SP	Probable ANTIGEN	0.567596	0	0.3433
872	CDS	R51_1	932350	936129	95.1225	1	+	3780	Uncharacterized protein YtfN	Cluster Ytf and putative sugar transporter; <br>Putative sugar ABC transporter (ytf cluster)		locus|R51_00895		IM (inner membrane)	C:plasma membrane	OuterMembrane	Unknown		Probable ANTIGEN	0.409483	1
873	CDS	R51_1	936132	936476	81.4518	3	+	345	UPF0131 protein YtfP	Cluster Ytf and putative sugar transporter; <br>Putative sugar ABC transporter (ytf cluster)		locus|R51_00896		unknown	C:cytoplasm	OuterMembrane	Unknown			0.800695	0
874	CDS	R51_1	937738	936530	90.6343	-1	-	1209	Putative sugar transporter	Cluster Ytf and putative sugar transporter		locus|R51_00897		IM (inner membrane)	C:plasma membrane	InnerMembrane	CytoplasmicMembrane			0.391586	12
875	CDS	R51_1	938895	937735	90.9091	-3	-	1161	FIG01045393: hypothetical protein	- none -		locus|R51_00898		IM (inner membrane)	C:cytoplasm	Cytoplasmic	Cytoplasmic			0.350431	0
876	CDS	R51_1	939838	939308	90.9091	-1	-	531	Inorganic pyrophosphatase (EC 3.6.1.1)	Phosphate metabolism		locus|R51_00899		C (cytoplasmic)	C:cytoplasm	Cytoplasmic	Cytoplasmic			0.300789	0
877	CDS	R51_1	941063	940065	90.9091	-2	-	999	Fructose-1,6-bisphosphatase, type I (EC 3.1.3.11)	Cluster Ytf and putative sugar transporter; <br>Glycolysis and Gluconeogenesis; <br>Putative sugar ABC transporter (ytf cluster)		locus|R51_00900		C (cytoplasmic)	C:plasma membrane	Cytoplasmic	Cytoplasmic			0.265416	0
878	CDS	R51_1	941238	942611	90.9091	3	+	1374	UDP-N-acetylmuramate:L-alanyl-gamma-D-glutamyl-meso-diaminopimelate ligase (EC 6.3.2.-)	Peptidoglycan biosynthesis--gjo; <br>Recycling of Peptidoglycan Amino Acids		locus|R51_00901		P (Periplasm)	C:extracellular space	Cytoplasmic	Cytoplasmic	SP		0.34046	0
879	CDS	R51_1	943269	942718	77.2613	-3	-	552	FIG138315: Putative alpha helix protein	Putative TldE-TldD proteolytic complex		locus|R51_00902		C (cytoplasmic)	C:cytoplasm	Cytoplasmic	Cytoplasmic		Probable ANTIGEN	0.290209	0
880	CDS	R51_1	943365	944717	92.0311	3	+	1353	TldE protein, part of TldE/TldD proteolytic complex	Putative TldE-TldD proteolytic complex		locus|R51_00903		C (cytoplasmic)	C:cytoplasm	Cytoplasmic	Cytoplasmic			0.380068	0
3275	CDS	R51_1	3382123	3381188	95.1912	-1	-	936	Fimbriae usher protein StcC	Unknown carbohydrate utilization ( cluster Yeg )		locus|R51_03333		OM (Outer Membrane)	C:outer membrane	OuterMembrane	OuterMembrane	SP	Probable ANTIGEN	0.550019	0	0.4671
882	CDS	R51_1	945489	945818	47.1262	3	+	330	FIG01045571: hypothetical protein	- none -		locus|R51_00905		C (cytoplasmic)	C:cytoplasm	Cytoplasmic	Unknown			0.437248	0
883	CDS	R51_1	945829	946191	76.9865	1	+	363	FIG00628496: hypothetical protein	- none -		locus|R51_00906		C (cytoplasmic)	C:cytoplasm	Cytoplasmic	Unknown		Probable ANTIGEN	0.557804	0
884	CDS	R51_1	946191	946493	60.1099	3	+	303	FIG074102: hypothetical protein	- none -		locus|R51_00907		C (cytoplasmic)	C:cytoplasm	Cytoplasmic	Unknown			0.311349	0
885	CDS	R51_1	946516	947292	90.1076	1	+	777	Putative inner membrane protein	- none -		locus|R51_00908		IM (inner membrane)	C:plasma membrane	InnerMembrane	CytoplasmicMembrane			0.434556	6
886	CDS	R51_1	947304	947948	78.9329	3	+	645	Putative inner membrane protein	- none -		locus|R51_00909		IM (inner membrane)	C:plasma membrane	InnerMembrane	CytoplasmicMembrane			0.42387	6
887	CDS	R51_1	948007	949140	90.9091	1	+	1134	Metallo-dependent hydrolases, subgroup B	- none -		locus|R51_00910		C (cytoplasmic)	C:cytoplasm	Cytoplasmic	Cytoplasmic			0.46848	0
888	CDS	R51_1	949124	950242	90.9091	2	+	1119	D-Glucosaminate-6-phosphate ammonia-lyase (EC 4.3.1.-)	- none -		locus|R51_00911		unknown	C:cytoplasm	Cytoplasmic	Cytoplasmic			0.346648	0
889	CDS	R51_1	950239	950979	90.9091	1	+	741	2-dehydro-3-deoxyphosphogluconate aldolase (EC 4.1.2.14) in D-glucosaminate utilization operon	- none -		locus|R51_00912		C (cytoplasmic)	C:cytoplasm	Cytoplasmic	Unknown			0.345498	0
890	CDS	R51_1	950996	952909	90.9091	2	+	1914	Putative BglB-family transcriptional antiterminator	- none -		locus|R51_00913		C (cytoplasmic)	C:cytoplasm	Cytoplasmic	Cytoplasmic			0.464178	0
891	CDS	R51_1	952987	953229	86.9705	1	+	243	RelB/StbD replicon stabilization protein (antitoxin to RelE/StbE)	Toxin-antitoxin replicon stabilization systems		locus|R51_00914		C (cytoplasmic)	C:cytoplasm	Cytoplasmic	Cytoplasmic			0.447052	0
892	CDS	R51_1	953219	953503	59.2169	2	+	285	RelE/StbE replicon stabilization toxin	Toxin-antitoxin replicon stabilization systems		locus|R51_00915		C (cytoplasmic)	C:cytoplasm	Cytoplasmic	Cytoplasmic			0.331153	0
893	CDS	R51_1	953971	953507	80.055	-1	-	465	Ribonucleotide reductase of class III (anaerobic), activating protein (EC 1.97.1.4)	Ribonucleotide reduction		locus|R51_00916		C (cytoplasmic)	C:cytoplasm	Cytoplasmic	Cytoplasmic			0.272888	0
894	CDS	R51_1	956231	954093	93.5883	-2	-	2139	Ribonucleotide reductase of class III (anaerobic), large subunit (EC 1.17.4.2)	Ribonucleotide reduction		locus|R51_00917		C (cytoplasmic)	C:cytoplasm	Cytoplasmic	Cytoplasmic			0.398722	0
895	CDS	R51_1	958288	956681	92.1685	-1	-	1608	Trehalose-6-phosphate hydrolase (EC 3.2.1.93)	Trehalose Uptake and Utilization		locus|R51_00918		unknown	C:cytoplasm	Cytoplasmic	Cytoplasmic			0.495351	0
896	CDS	R51_1	959756	958338	90.9091	-2	-	1419	PTS system, trehalose-specific IIB component (EC 2.7.1.69) / PTS system, trehalose-specific IIC component (EC 2.7.1.69)	Trehalose Uptake and Utilization; <br>Trehalose Uptake and Utilization		locus|R51_00919		IM (inner membrane)	C:plasma membrane	InnerMembrane	CytoplasmicMembrane			0.494229	10
897	CDS	R51_1	960841	959894	90.9091	-1	-	948	Trehalose operon transcriptional repressor	Trehalose Uptake and Utilization		locus|R51_00920		C (cytoplasmic)	C:cytoplasm	Cytoplasmic	Cytoplasmic			0.22842	0
898	CDS	R51_1	961225	963933	91.0007	1	+	2709	Mg(2+) transport ATPase, P-type (EC 3.6.3.2)	Magnesium transport		locus|R51_00921		IM (inner membrane)	C:plasma membrane	InnerMembrane	CytoplasmicMembrane			0.347777	8
899	CDS	R51_1	964495	964049	65.6057	-1	-	447	Mobile element protein	- none -		locus|R51_00922		C (cytoplasmic)	C:plasma membrane	Cytoplasmic	CytoplasmicMembrane			0.672323	2
900	CDS	R51_1	964956	964570	80.0779	-3	-	387	Endoribonuclease L-PSP	CBSS-176299.4.peg.1996A		locus|R51_00923		C (cytoplasmic)	C:cytoplasm	Cytoplasmic	Cytoplasmic			0.296936	0
901	CDS	R51_1	965494	965033	68.3536	-1	-	462	Aspartate carbamoyltransferase regulatory chain (PyrI)	De Novo Pyrimidine Synthesis		locus|R51_00924		C (cytoplasmic)	C:cytoplasm	Cytoplasmic	Unknown			0.336812	0
902	CDS	R51_1	966442	965507	90.9091	-1	-	936	Aspartate carbamoyltransferase (EC 2.1.3.2)	De Novo Pyrimidine Synthesis		locus|R51_00925		C (cytoplasmic)	C:cytoplasm	Cytoplasmic	Cytoplasmic			0.246719	0
903	CDS	R51_1	966579	966478	7.94596	-3	-	102	PyrBI operon leader peptide	- none -		locus|R51_00926		unknown		Cytoplasmic	Unknown			0.490834	0
904	CDS	R51_1	967158	966670	82.8486	-3	-	489	Arginine pathway regulatory protein ArgR, repressor of arg regulon	Arginine Biosynthesis -- gjo; <br>Arginine Biosynthesis extended; <br>Arginine Deiminase Pathway; <br>Arginine and Ornithine Degradation		locus|R51_00927		C (cytoplasmic)	C:cytoplasm	Cytoplasmic	Cytoplasmic			0.285943	0
905	CDS	R51_1	968748	967345	90.9091	-3	-	1404	Arginine/ornithine antiporter ArcD	Arginine Deiminase Pathway; <br>Arginine and Ornithine Degradation; <br>Polyamine Metabolism		locus|R51_00928		IM (inner membrane)	C:plasma membrane	InnerMembrane	CytoplasmicMembrane			0.471625	11
906	CDS	R51_1	969808	968804	90.9091	-1	-	1005	Ornithine carbamoyltransferase (EC 2.1.3.3)	Arginine Biosynthesis -- gjo; <br>Arginine Biosynthesis extended; <br>Arginine Deiminase Pathway; <br>Arginine and Ornithine Degradation		locus|R51_00929		C (cytoplasmic)	C:cytoplasm	Cytoplasmic	Cytoplasmic			0.555588	0
907	CDS	R51_1	970852	969920	90.9091	-1	-	933	Carbamate kinase (EC 2.7.2.2)	Arginine Deiminase Pathway; <br>Arginine and Ornithine Degradation; <br>Polyamine Metabolism		locus|R51_00930		unknown	C:cytoplasm	Cytoplasmic	Cytoplasmic			0.379992	0
908	CDS	R51_1	971426	970863	89.8557	-2	-	564	Arginine deiminase (EC 3.5.3.6)	Arginine Deiminase Pathway; <br>Arginine and Ornithine Degradation		locus|R51_00931		C (cytoplasmic)	C:cytoplasm	Cytoplasmic	Cytoplasmic			0.570824	0
909	CDS	R51_1	971629	972081	59.0337	1	+	453	Protein yjgK	- none -		locus|R51_00932		unknown	C:cytoplasm	Cytoplasmic	Unknown			0.424241	0
910	CDS	R51_1	973159	972155	90.9091	-1	-	1005	Ornithine carbamoyltransferase (EC 2.1.3.3)	Arginine Biosynthesis -- gjo; <br>Arginine Biosynthesis extended; <br>Arginine Deiminase Pathway; <br>Arginine and Ornithine Degradation		locus|R51_00933		C (cytoplasmic)	C:cytoplasm	Cytoplasmic	Cytoplasmic			0.401308	0
911	CDS	R51_1	973325	973741	60.7282	2	+	417	Ribonuclease E inhibitor RraB	RNA processing and degradation, bacterial		locus|R51_00934		C (cytoplasmic)	C:cytoplasm	Cytoplasmic	Cytoplasmic			0.371467	0
912	CDS	R51_1	973801	974565	57.0414	1	+	765	tRNA-(ms[2]io[6]A)-hydroxylase (EC 1.-.-.-)	tRNA modification Bacteria		locus|R51_00935		C (cytoplasmic)	C:cytoplasm	Cytoplasmic	Cytoplasmic			0.386205	0
913	CDS	R51_1	975287	974799	90.9091	-2	-	489	putative exported protein	- none -		locus|R51_00936		P (Periplasm)	C:extracellular space	Periplasmic	Unknown	SP		0.371331	0
914	CDS	R51_1	975897	975394	66.7964	-3	-	504	Aspartate N-acetyltransferase (EC 2.3.1.17)	- none -		locus|R51_00937		C (cytoplasmic)	C:cytoplasm	Cytoplasmic	Cytoplasmic			0.371407	0
915	CDS	R51_1	976092	977279	89.5123	3	+	1188	Inner membrane protein YjgN	- none -		locus|R51_00938		IM (inner membrane)	C:plasma membrane	InnerMembrane	CytoplasmicMembrane			0.449407	8
916	CDS	R51_1	980276	977421	98.4658	-2	-	2856	Valyl-tRNA synthetase (EC 6.1.1.9)	CBSS-208964.1.peg.3826; <br>tRNA aminoacylation, Val		locus|R51_00939		C (cytoplasmic)	C:cytoplasm	Cytoplasmic	Cytoplasmic			0.675818	0
917	CDS	R51_1	980758	980276	86.9934	-1	-	483	DNA polymerase III chi subunit (EC 2.7.7.7)	CBSS-208964.1.peg.3826		locus|R51_00940		C (cytoplasmic)	C:cytoplasm	Cytoplasmic	Cytoplasmic			0.36715	0
918	CDS	R51_1	982367	980856	93.7028	-2	-	1512	Cytosol aminopeptidase PepA (EC 3.4.11.1)	Aminopeptidases (EC 3.4.11.-); <br>CBSS-208964.1.peg.3826; <br>Dehydrogenase complexes		locus|R51_00941		C (cytoplasmic)	C:cytoplasm	Cytoplasmic	Cytoplasmic			0.782134	0
919	CDS	R51_1	982706	983806	90.7717	2	+	1101	FIG000988: Predicted permease	CBSS-208964.1.peg.3826		locus|R51_00942		IM (inner membrane)	C:plasma membrane	InnerMembrane	CytoplasmicMembrane			0.543729	6
920	CDS	R51_1	983806	984888	90.4511	1	+	1083	FIG000906: Predicted Permease	CBSS-208964.1.peg.3826		locus|R51_00943		IM (inner membrane)	C:plasma membrane	InnerMembrane	CytoplasmicMembrane			0.690986	6
921	CDS	R51_1	986092	985094	90.9091	-1	-	999	Positive regulator of L-idonate catabolism	D-gluconate and ketogluconates metabolism		locus|R51_00944		C (cytoplasmic)	C:cytoplasm	Cytoplasmic	Cytoplasmic			0.436417	0
922	CDS	R51_1	987439	986156	90.9091	-1	-	1284	5-keto-D-gluconate 5-reductase (EC 1.1.1.69)	D-gluconate and ketogluconates metabolism		locus|R51_00945		IM (inner membrane)	C:plasma membrane	InnerMembrane	CytoplasmicMembrane			0.334026	5
923	CDS	R51_1	988495	987464	90.9091	-1	-	1032	L-idonate 5-dehydrogenase (EC 1.1.1.264)	D-gluconate and ketogluconates metabolism		locus|R51_00946		unknown	C:cytoplasm	Cytoplasmic	Cytoplasmic			0.404212	0
924	CDS	R51_1	988712	989242	88.5963	2	+	531	Gluconokinase (EC 2.7.1.12)	D-gluconate and ketogluconates metabolism; <br>Entner-Doudoroff Pathway		locus|R51_00947		C (cytoplasmic)	C:cytoplasm	Cytoplasmic	Cytoplasmic			0.452595	0
925	CDS	R51_1	990289	989270	90.2908	-1	-	1020	Alcohol dehydrogenase (EC 1.1.1.1)	5-FCL-like protein; <br>Butanol Biosynthesis; <br>Fermentations: Mixed acid; <br>Glycerolipid and Glycerophospholipid Metabolism in Bacteria		locus|R51_00948		unknown	C:cytoplasm	Cytoplasmic	Cytoplasmic			0.697274	0
926	CDS	R51_1	991091	991591	69.2237	2	+	501	Mobile element protein	- none -		locus|R51_00950		C (cytoplasmic)	C:cytoplasm	Cytoplasmic	Cytoplasmic			0.428202	0
927	CDS	R51_1	991668	991916	67.2315	3	+	249	hypothetical protein	- none -		locus|R51_00951		C (cytoplasmic)	C:cytoplasm	Cytoplasmic	Unknown			0.42017	0
928	CDS	R51_1	992025	992264	63.9112	3	+	240	CcdA protein (antitoxin to CcdB)	Toxin-antitoxin replicon stabilization systems		locus|R51_00952		C (cytoplasmic)	C:cytoplasm	Cytoplasmic	Unknown			0.523156	0
929	CDS	R51_1	992267	992575	54.1791	2	+	309	CcdB toxin protein	Toxin-antitoxin replicon stabilization systems		locus|R51_00953		C (cytoplasmic)	C:cytoplasm	Cytoplasmic	Unknown			0.306273	0
930	CDS	R51_1	992981	993139	28.6238	2	+	159	COG0582: Integrase	- none -		locus|R51_00954		unknown	C:cytoplasm	Cytoplasmic	Unknown			0.366369	0
931	CDS	R51_1	994194	993661	57.0185	-3	-	534	Mobile element protein	- none -		locus|R51_00955		C (cytoplasmic)	C:cytoplasm	Cytoplasmic	Cytoplasmic			0.300469	0
3641	CDS	R51_1	3782272	3780080	99.6336	-1	-	2193	adherence and invasion outermembrane protein (Inv,enhances Peyer&#39;s patches colonization)	- none -		locus|R51_03706		EC (Extracellular)	C:extracellular space	OuterMembrane	OuterMembrane	SP	Probable ANTIGEN	0.544855	0	0.7491	0.994505
3690	CDS	R51_1	3837497	3836811	80.0779	-2	-	687	putative alpha helix protein	- none -		locus|R51_03755		OM (Outer Membrane)	C:cytoplasm	Periplasmic	Unknown	SP	Probable ANTIGEN	0.577662	0	0.6744	0.994505
3758	CDS	R51_1	3910414	3921888	95.1912	1	+	11475	T1SS secreted agglutinin RTX	Type I secretion system for aggregation		locus|R51_03827		EC (Extracellular)	C:cytoplasm	Extracellular	Unknown	SP	Probable ANTIGEN	0.596434	0	0.7603	0.961538
935	CDS	R51_1	997781	996975	90.9091	-2	-	807	Virulence regulon transcriptional activator virF	- none -		locus|R51_00959		C (cytoplasmic)	C:plasma membrane	Cytoplasmic	Cytoplasmic			0.69018	0
936	CDS	R51_1	998358	998567	20.6549	3	+	210	Probable regulatory protein	- none -		locus|R51_00960		unknown	C:cytoplasm	Cytoplasmic	Unknown			0.352299	0
937	CDS	R51_1	998552	998902	64.5523	2	+	351	Putative GerE-family regulatory protein	- none -		locus|R51_00961		unknown	C:cytoplasm	Cytoplasmic	Cytoplasmic			0.300942	0
938	CDS	R51_1	998881	999024	2.83948	1	+	144	hypothetical protein	- none -		locus|R51_00962		unknown	C:plasma membrane	Cytoplasmic	CytoplasmicMembrane			0.6385	1
939	CDS	R51_1	999147	999800	90.7717	3	+	654	Thiol:disulfide interchange protein dsbA precursor	- none -		locus|R51_00963		unknown	C:extracellular space	InnerMembrane	Unknown	SP		0.402896	0
940	CDS	R51_1	999751	999936	35.7225	1	+	186	hypothetical protein	- none -		locus|R51_00964		IM (inner membrane)	C:outer membrane	Cytoplasmic	CytoplasmicMembrane			0.270489	1
941	CDS	R51_1	999987	1000832	81.1541	3	+	846	Outer membrane protein assembly factor YaeT precursor	Lipopolysaccharide assembly; <br>Llipid A biosynthesis cluster		locus|R51_00965		P (Periplasm)	C:plasma membrane	Cytoplasmic	Unknown	SP		0.353306	1
942	CDS	R51_1	1001095	1001373	63.6135	1	+	279	Mobile element protein	- none -		locus|R51_00966		C (cytoplasmic)	C:cytoplasm	Cytoplasmic	Cytoplasmic			0.274984	0
943	CDS	R51_1	1001605	1001357	42.5922	-1	-	249	FIG01048645: hypothetical protein	- none -		locus|R51_00967		C (cytoplasmic)	C:outer membrane	Periplasmic	Unknown			0.410092	0
944	CDS	R51_1	1001657	1001992	82.5052	2	+	336	Mobile element protein	- none -		locus|R51_00968		C (cytoplasmic)	C:cytoplasm	Cytoplasmic	Cytoplasmic			0.28687	0
945	CDS	R51_1	1002461	1002625	36.9361	2	+	165	FIG01045390: hypothetical protein	- none -		locus|R51_00969		unknown	C:cytoplasm	Cytoplasmic	Unknown			0.36841	0
946	CDS	R51_1	1002626	1003336	68.5826	2	+	711	FIG01045390: hypothetical protein	- none -		locus|R51_00970		C (cytoplasmic)	C:cytoplasm	Cytoplasmic	Cytoplasmic			0.514698	0
947	CDS	R51_1	1003874	1003767	23.0135	-2	-	108	hypothetical protein	- none -		locus|R51_00971		unknown		Cytoplasmic	Unknown			0.685616	0
948	CDS	R51_1	1004532	1003816	90.9091	-3	-	717	FIG007491: hypothetical protein YeeN	- none -		locus|R51_00972		C (cytoplasmic)	C:cytoplasm	Cytoplasmic	Cytoplasmic			0.562509	0
949	CDS	R51_1	1006717	1005092	90.9091	-1	-	1626	3-demethylubiquinone-9 3-methyltransferase (EC 2.1.1.64)	- none -		locus|R51_00973		C (cytoplasmic)	C:cytoplasm	Cytoplasmic	Cytoplasmic			0.373516	0
950	CDS	R51_1	1006985	1006728	6.73231	-2	-	258	FIG01045803: hypothetical protein	- none -		locus|R51_00974		C (cytoplasmic)	C:cytoplasm	Cytoplasmic	Unknown			0.448247	0
951	CDS	R51_1	1007419	1007228	41.3098	-1	-	192	FIG01046166: hypothetical protein	- none -		locus|R51_00975		C (cytoplasmic)	C:plasma membrane	Cytoplasmic	Unknown			0.417155	0
952	CDS	R51_1	1007473	1008081	85.1156	1	+	609	FIG074102: hypothetical protein	- none -		locus|R51_00976		C (cytoplasmic)	C:outer membrane	OuterMembrane	Unknown			0.233546	0
953	CDS	R51_1	1008433	1009344	81.5663	1	+	912	FIG074102: hypothetical protein	- none -		locus|R51_00977		C (cytoplasmic)	C:cytoplasm	Cytoplasmic	Cytoplasmic			0.307919	0
954	CDS	R51_1	1009549	1010010	86.8789	1	+	462	Putative inner membrane or exported	- none -		locus|R51_00978		P (Periplasm)	C:outer membrane	Cytoplasmic	Unknown	SP		0.593848	1
955	CDS	R51_1	1010545	1010027	61.1404	-1	-	519	Dienelactone hydrolase family	- none -		locus|R51_00979		IM (inner membrane)	C:cytoplasm	Cytoplasmic	Unknown			0.482924	0
956	CDS	R51_1	1011090	1011815	90.9091	3	+	726	Uxu operon transcriptional regulator	D-Galacturonate and D-Glucuronate Utilization		locus|R51_00980		C (cytoplasmic)	C:cytoplasm	Cytoplasmic	Cytoplasmic			0.281709	0
957	CDS	R51_1	1012829	1011816	90.9091	-2	-	1014	Tryptophanyl-tRNA synthetase (EC 6.1.1.2)	tRNA aminoacylation, Trp		locus|R51_00981		C (cytoplasmic)	C:cytoplasm	Cytoplasmic	Cytoplasmic			0.451319	0
958	CDS	R51_1	1013631	1014077	84.9095	3	+	447	Putative cytoplasmic protein USSDB7A	USS-DB-7		locus|R51_00982		C (cytoplasmic)	C:cytoplasm	Cytoplasmic	Cytoplasmic		Probable ANTIGEN	0.466269	0
959	CDS	R51_1	1014316	1015050	85.7339	1	+	735	Aspartate racemase (EC 5.1.1.13)	Glutamine, Glutamate, Aspartate and Asparagine Biosynthesis		locus|R51_00983		unknown	C:cytoplasm	Cytoplasmic	Unknown	SP		0.299683	0
960	CDS	R51_1	1015598	1015056	67.346	-2	-	543	LysR family transcriptional regulator QseA	LysR-family proteins in Escherichia coli; <br>LysR-family proteins in Salmonella enterica Typhimurium		locus|R51_00984		C (cytoplasmic)	C:cytoplasm	Cytoplasmic	Unknown			0.568259	0
961	CDS	R51_1	1015964	1015782	2.2899	-2	-	183	LysR family transcriptional regulator QseA	LysR-family proteins in Escherichia coli; <br>LysR-family proteins in Salmonella enterica Typhimurium		locus|R51_00985		C (cytoplasmic)	C:cytoplasm	Cytoplasmic	Unknown			0.319073	0
962	CDS	R51_1	1017255	1016083	90.932	-3	-	1173	Isoaspartyl dipeptidase (EC 3.4.19.5) @ Asp-X dipeptidase	Protein degradation; <br>Protein degradation		locus|R51_00986		C (cytoplasmic)	C:cytoplasm	Cytoplasmic	Cytoplasmic		Probable ANTIGEN	0.241775	0
963	CDS	R51_1	1017729	1017268	67.9643	-3	-	462	Putative membrane protein	- none -		locus|R51_00987		IM (inner membrane)	C:plasma membrane	InnerMembrane	CytoplasmicMembrane			0.280844	3
964	CDS	R51_1	1018397	1017726	86.6041	-2	-	672	FIG00637915: hypothetical protein	- none -		locus|R51_00988		IM (inner membrane)	C:plasma membrane	InnerMembrane	CytoplasmicMembrane			0.370177	4
965	CDS	R51_1	1020421	1019270	79.2764	-1	-	1152	Putative transport protein	- none -		locus|R51_00989		IM (inner membrane)	C:plasma membrane	InnerMembrane	CytoplasmicMembrane			0.525457	11
966	CDS	R51_1	1021912	1020641	90.9091	-1	-	1272	Putative inner membrane protein	- none -		locus|R51_00990		IM (inner membrane)	C:plasma membrane	InnerMembrane	CytoplasmicMembrane			0.368252	3
967	CDS	R51_1	1023240	1021999	88.5963	-3	-	1242	FIG00637933: hypothetical protein	- none -		locus|R51_00991		IM (inner membrane)	C:plasma membrane	InnerMembrane	CytoplasmicMembrane			0.425249	12
968	CDS	R51_1	1023719	1024672	90.0618	2	+	954	Uncharacterized protein YfaD	- none -		locus|R51_00992		C (cytoplasmic)	C:cytoplasm	Cytoplasmic	Cytoplasmic			0.302716	0
969	CDS	R51_1	1026496	1024763	91.0007	-1	-	1734	Type I restriction-modification system, restriction subunit R (EC 3.1.21.3)	Restriction-Modification System; <br>Type I Restriction-Modification		locus|R51_00993		IM (inner membrane)	C:cytoplasm	Cytoplasmic	Cytoplasmic			0.468182	1
970	CDS	R51_1	1027895	1026591	90.9091	-2	-	1305	Type I restriction-modification system, specificity subunit S (EC 3.1.21.3)	Restriction-Modification System; <br>Type I Restriction-Modification		locus|R51_00994		C (cytoplasmic)	C:cytoplasm	OuterMembrane	Unknown			0.415845	0
971	CDS	R51_1	1029504	1027885	96.588	-3	-	1620	Type I restriction-modification system, DNA-methyltransferase subunit M (EC 2.1.1.72)	Restriction-Modification System; <br>Type I Restriction-Modification		locus|R51_00995		C (cytoplasmic)	C:cytoplasm	Cytoplasmic	Unknown			0.521685	0
972	CDS	R51_1	1029906	1029568	36.9361	-3	-	339	FIG01047896: hypothetical protein	- none -		locus|R51_00996		C (cytoplasmic)	C:cytoplasm	Cytoplasmic	Cytoplasmic			0.626503	0
973	CDS	R51_1	1030322	1029855	86.5812	-2	-	468	FIG01047764: hypothetical protein	- none -		locus|R51_00997		C (cytoplasmic)	C:cytoplasm	Cytoplasmic	Unknown			0.353054	0
974	CDS	R51_1	1030734	1030294	73.5516	-3	-	441	FIG01045208: hypothetical protein	- none -		locus|R51_00998		C (cytoplasmic)	C:cytoplasm	Periplasmic	Unknown			0.547522	0
975	CDS	R51_1	1030859	1030993	24.2272	2	+	135	hypothetical protein	- none -		locus|R51_00999		unknown	C:plasma membrane	Cytoplasmic	CytoplasmicMembrane			0.266873	1
976	CDS	R51_1	1032278	1031025	90.9091	-2	-	1254	Type I restriction-modification system methylation subunit	- none -		locus|R51_01000		C (cytoplasmic)	C:cytoplasm	Cytoplasmic	Cytoplasmic			0.469096	0
977	CDS	R51_1	1032856	1032437	75.7499	-1	-	420	hypothetical protein	- none -		locus|R51_01001		C (cytoplasmic)	C:cytoplasm	Cytoplasmic	Unknown			0.903122	0
978	CDS	R51_1	1033502	1033642	21.0213	2	+	141	hypothetical protein	- none -		locus|R51_01002		unknown	C:cytoplasm	Cytoplasmic	Unknown		Probable ANTIGEN	0.419393	0
979	CDS	R51_1	1035309	1033594	90.9091	-3	-	1716	DNA helicase II related protein	- none -		locus|R51_01003		unknown	C:cytoplasm	Cytoplasmic	Cytoplasmic			0.469971	0
980	CDS	R51_1	1035705	1035992	18.1131	3	+	288	FIG01045296: hypothetical protein	- none -		locus|R51_01004		IM (inner membrane)	C:cytoplasm	Cytoplasmic	Unknown			0.358863	0
981	CDS	R51_1	1035979	1036281	47.1491	1	+	303	FIG00638610: hypothetical protein	- none -		locus|R51_01005		C (cytoplasmic)	C:cytoplasm	Cytoplasmic	Unknown			0.607241	0
982	CDS	R51_1	1037312	1036356	85.8255	-2	-	957	Putative metal chaperone, involved in Zn homeostasis, GTPase of COG0523 family	G3E family of P-loop GTPases (metallocenter biosynthesis); <br>Zinc regulated enzymes		locus|R51_01006		C (cytoplasmic)	C:cytoplasm	Cytoplasmic	Cytoplasmic			0.418972	0
983	CDS	R51_1	1037526	1037323	42.9586	-3	-	204	COG2879, Hypothetical small protein yjiX	- none -		locus|R51_01007		C (cytoplasmic)	C:cytoplasm	Periplasmic	Unknown			0.329404	0
984	CDS	R51_1	1039327	1037621	90.9091	-1	-	1707	Carbon starvation protein A paralog	Carbon Starvation		locus|R51_01008		IM (inner membrane)	C:plasma membrane	InnerMembrane	CytoplasmicMembrane			0.508327	13
985	CDS	R51_1	1039694	1041355	96.2904	2	+	1662	Methyl-accepting chemotaxis protein I (serine chemoreceptor protein)	Bacterial Chemotaxis		locus|R51_01009		IM (inner membrane)	C:plasma membrane	InnerMembrane	CytoplasmicMembrane			0.277009	2
986	CDS	R51_1	1041678	1044443	90.932	3	+	2766	Transcriptional regulatory protein levR	- none -		locus|R51_01010		C (cytoplasmic)	C:cytoplasm	Cytoplasmic	Cytoplasmic			0.434014	0
987	CDS	R51_1	1044545	1044967	82.4594	2	+	423	PTS system, mannose-specific IIA component (EC 2.7.1.69)	Mannose Metabolism; <br>Sialic Acid Metabolism		locus|R51_01011		C (cytoplasmic)	C:cytoplasm	Cytoplasmic	Unknown			0.473537	0
988	CDS	R51_1	1044982	1045443	90.9091	1	+	462	PTS system, mannose-specific IIB component (EC 2.7.1.69)	Mannose Metabolism; <br>Sialic Acid Metabolism		locus|R51_01012		C (cytoplasmic)	C:cytoplasm	Cytoplasmic	Cytoplasmic			0.300513	0
989	CDS	R51_1	1045469	1046248	81.0625	2	+	780	PTS system, mannose-specific IIC component (EC 2.7.1.69)	Mannose Metabolism; <br>Sialic Acid Metabolism		locus|R51_01013		IM (inner membrane)	C:plasma membrane	InnerMembrane	CytoplasmicMembrane			0.337709	7
990	CDS	R51_1	1046226	1047074	88.5963	3	+	849	PTS system, mannose-specific IID component (EC 2.7.1.69)	Mannose Metabolism; <br>Sialic Acid Metabolism		locus|R51_01014		IM (inner membrane)	C:plasma membrane	InnerMembrane	CytoplasmicMembrane			0.405696	5
991	CDS	R51_1	1047087	1048145	90.8633	3	+	1059	Glucosamine--fructose-6-phosphate aminotransferase [isomerizing] (EC 2.6.1.16)	Sialic Acid Metabolism; <br>UDP-N-acetylmuramate from Fructose-6-phosphate Biosynthesis		locus|R51_01015		P (Periplasm)	C:cytoplasm	Cytoplasmic	Cytoplasmic			0.547631	0
992	CDS	R51_1	1048163	1048378	42.6609	2	+	216	Putative glucosamine-fructose-6-phosphate aminotransferase	- none -		locus|R51_01016		C (cytoplasmic)	C:cytoplasm	Cytoplasmic	CytoplasmicMembrane			0.263913	0
993	CDS	R51_1	1048418	1049155	88.0009	2	+	738	Putative glucosamine-fructose-6-phosphate aminotransferase	- none -		locus|R51_01017		unknown	C:plasma membrane	Cytoplasmic	Cytoplasmic			0.744641	0
994	CDS	R51_1	1051580	1049289	92.4433	-2	-	2292	Phosphoglycerol transferase I (EC 2.7.8.20)	Synthesis of osmoregulated periplasmic glucans		locus|R51_01018		IM (inner membrane)	C:plasma membrane	Periplasmic	CytoplasmicMembrane			0.357279	4
3919	CDS	R51_1	4082834	4081701	93.6799	-2	-	1134	Lipoprotein NlpD	Stationary phase repair cluster		locus|R51_03992		unknown	C:cytoplasm	Extracellular	OuterMembrane	SP	Probable ANTIGEN	0.770851	0	0.6593	0.983516
996	CDS	R51_1	1053119	1052382	90.9091	-2	-	738	DNA replication protein DnaC	- none -		locus|R51_01020		EC (Extracellular)	C:cytoplasm	Cytoplasmic	Cytoplasmic			0.289263	0
997	CDS	R51_1	1053661	1053122	70.5519	-1	-	540	Primosomal protein I	- none -		locus|R51_01021		C (cytoplasmic)	C:cytoplasm	Periplasmic	Unknown			0.355694	0
998	CDS	R51_1	1054227	1053754	56.698	-3	-	474	FIG001826: putative inner membrane protein	CBSS-316275.9.peg.382		locus|R51_01022		IM (inner membrane)	C:plasma membrane	InnerMembrane	CytoplasmicMembrane			0.295563	4
999	CDS	R51_1	1055162	1054218	79.5741	-2	-	945	FIG023911: putative membrane protein	CBSS-316275.9.peg.382		locus|R51_01023		IM (inner membrane)	C:plasma membrane	InnerMembrane	CytoplasmicMembrane			0.379444	4
1000	CDS	R51_1	1055707	1056432	90.9091	1	+	726	Putative regulator	- none -		locus|R51_01024		C (cytoplasmic)	C:cytoplasm	Cytoplasmic	Unknown			0.341754	0
1001	CDS	R51_1	1056393	1057067	89.6954	3	+	675	Transcriptional activator protein bglJ	- none -		locus|R51_01025		C (cytoplasmic)	C:cytoplasm	Cytoplasmic	Cytoplasmic			0.456284	0
1002	CDS	R51_1	1057576	1057118	79.368	-1	-	459	tRNA proofreading protein STM4549	tRNA aminoacylation, Pro		locus|R51_01026		unknown	C:cytoplasm	Cytoplasmic	Cytoplasmic			0.427788	0
1003	CDS	R51_1	1058523	1057735	87.2223	-3	-	789	Ferric reductase (1.6.99.14)	Anaerobic respiratory reductases; <br>Hemin transport system		locus|R51_01027		C (cytoplasmic)	C:cytoplasm	Cytoplasmic	Cytoplasmic			0.366341	0
1004	CDS	R51_1	1059570	1058644	76.1392	-3	-	927	Putative membrane protein	- none -		locus|R51_01028		IM (inner membrane)	C:plasma membrane	InnerMembrane	CytoplasmicMembrane			0.361842	3
1005	CDS	R51_1	1059959	1060195	33.0891	2	+	237	FIG00638078: hypothetical protein	- none -		locus|R51_01029		IM (inner membrane)	C:plasma membrane	InnerMembrane	CytoplasmicMembrane			0.331154	3
1006	CDS	R51_1	1061649	1060621	90.9091	-3	-	1029	Ribosomal RNA small subunit methyltransferase C (EC 2.1.1.52)	RNA methylation		locus|R51_01032		C (cytoplasmic)	C:cytoplasm	Cytoplasmic	Periplasmic			0.345595	0
1007	CDS	R51_1	1061752	1062189	43.0501	1	+	438	DNA polymerase III psi subunit (EC 2.7.7.7)	- none -		locus|R51_01033		C (cytoplasmic)	C:cytoplasm	Cytoplasmic	Unknown			0.327407	0
1008	CDS	R51_1	1062134	1062580	58.5299	2	+	447	Ribosomal-protein-S18p-alanine acetyltransferase (EC 2.3.1.-)	Bacterial RNA-metabolizing Zn-dependent hydrolases; <br>Conserved gene cluster associated with Met-tRNA formyltransferase; <br>Possible RNA modification and stress response cluster; <br>Ribosome biogenesis bacterial; <br>YrdC-YciO-Sua5 protein family		locus|R51_01034		C (cytoplasmic)	C:cytoplasm	Cytoplasmic	Cytoplasmic			0.381963	0
1009	CDS	R51_1	1062599	1063279	89.9244	2	+	681	5&#39;-nucleotidase YjjG (EC 3.1.3.5)	Housecleaning nucleoside triphosphate pyrophosphatases		locus|R51_01035		C (cytoplasmic)	C:cytoplasm	Cytoplasmic	CytoplasmicMembrane			0.293361	0
1010	CDS	R51_1	1063371	1064960	94.7561	3	+	1590	Peptide chain release factor 3	Translation termination factors bacterial		locus|R51_01036		C (cytoplasmic)	C:cytoplasm	Cytoplasmic	Cytoplasmic			0.310918	0
3954	CDS	R51_1	4118383	4118880	90.9091	1	+	498	Minor fimbrial subunit StfF	The fimbrial Stf cluster		locus|R51_04027		OM (Outer Membrane)	C:extracellular space	Extracellular	Unknown	SP	Probable ANTIGEN	0.654405	0	0.5144	0.983516
1012	CDS	R51_1	1066108	1066269	16.4415	1	+	162	FIG01200701: possible membrane protein	- none -		locus|R51_01038		IM (inner membrane)	C:plasma membrane	InnerMembrane	CytoplasmicMembrane		Probable ANTIGEN	0.301857	2
1013	CDS	R51_1	1066372	1067466	90.9091	1	+	1095	FIG00638703: hypothetical protein	- none -		locus|R51_01039		C (cytoplasmic)	C:cytoplasm	Periplasmic	Unknown			0.427461	0
1014	CDS	R51_1	1067463	1068236	89.9473	3	+	774	Putative deoxyribonuclease YjjV	Deoxyribose and Deoxynucleoside Catabolism; <br>YcfH		locus|R51_01040		C (cytoplasmic)	C:cytoplasm	Cytoplasmic	Cytoplasmic			0.308173	0
1015	CDS	R51_1	1068856	1068269	90.7717	-1	-	588	radical activating enzyme	- none -		locus|R51_01041		C (cytoplasmic)	C:cytoplasm	Cytoplasmic	Cytoplasmic			0.685398	0
1016	CDS	R51_1	1070654	1069104	90.9091	-2	-	1551	FIG00638118: hypothetical protein	- none -		locus|R51_01042		C (cytoplasmic)	C:cytoplasm	Cytoplasmic	Cytoplasmic			0.279705	0
1017	CDS	R51_1	1070914	1071693	90.7717	1	+	780	Deoxyribose-phosphate aldolase (EC 4.1.2.4)	Deoxyribose and Deoxynucleoside Catabolism		locus|R51_01043		C (cytoplasmic)	C:cytoplasm	Cytoplasmic	Cytoplasmic			0.340604	0
1018	CDS	R51_1	1071817	1072362	61.0946	1	+	546	Thymidine phosphorylase (EC 2.4.2.4)	Deoxyribose and Deoxynucleoside Catabolism; <br>pyrimidine conversions		locus|R51_01044		C (cytoplasmic)	C:cytoplasm	Cytoplasmic	Unknown			0.469189	0
1019	CDS	R51_1	1072344	1073138	90.703	3	+	795	Thymidine phosphorylase (EC 2.4.2.4)	Deoxyribose and Deoxynucleoside Catabolism; <br>pyrimidine conversions		locus|R51_01045		C (cytoplasmic)	C:cytoplasm	Cytoplasmic	Unknown			0.901311	0
1020	CDS	R51_1	1073190	1074413	92.0082	3	+	1224	Phosphopentomutase (EC 5.4.2.7)	Deoxyribose and Deoxynucleoside Catabolism		locus|R51_01046		C (cytoplasmic)	C:cytoplasm	Cytoplasmic	Cytoplasmic			0.585933	0
1021	CDS	R51_1	1074623	1075342	89.123	2	+	720	Purine nucleoside phosphorylase (EC 2.4.2.1)	Adenosyl nucleosidases; <br>Deoxyribose and Deoxynucleoside Catabolism; <br>Purine conversions; <br>pyrimidine conversions		locus|R51_01047		C (cytoplasmic)	C:cytoplasm	Cytoplasmic	Cytoplasmic			0.872435	0
1022	CDS	R51_1	1075521	1076849	90.9091	3	+	1329	hypothetical protein	- none -		locus|R51_01048		C (cytoplasmic)	C:cytoplasm	InnerMembrane	Unknown			0.68471	0
1023	CDS	R51_1	1077870	1076854	90.9091	-3	-	1017	Lipoate-protein ligase A	Lipoic acid metabolism		locus|R51_01049		C (cytoplasmic)	C:cytoplasm	Cytoplasmic	Cytoplasmic			0.756265	0
1024	CDS	R51_1	1078548	1077904	73.2311	-3	-	645	Lipoate-protein ligase A	Lipoic acid metabolism		locus|R51_01050		C (cytoplasmic)	C:plasma membrane	InnerMembrane	CytoplasmicMembrane			0.474728	2
1025	CDS	R51_1	1078665	1079633	90.3595	3	+	969	Phosphoserine phosphatase (EC 3.1.3.3)	Glycine and Serine Utilization; <br>Serine Biosynthesis; <br>Serine Biosynthesis		locus|R51_01051		IM (inner membrane)	C:cytoplasm	Cytoplasmic	Cytoplasmic			0.950661	0
1026	CDS	R51_1	1079717	1081099	90.9091	2	+	1383	DNA repair protein RadA	DNA repair, bacterial; <br>Proteolysis in bacteria, ATP-dependent		locus|R51_01052		C (cytoplasmic)	C:cytoplasm	Cytoplasmic	CytoplasmicMembrane			0.296506	0
1027	CDS	R51_1	1081250	1082482	90.9091	2	+	1233	NadR transcriptional regulator / Nicotinamide-nucleotide adenylyltransferase, NadR family (EC 2.7.7.1) / Ribosylnicotinamide kinase (EC 2.7.1.22)	NAD and NADP cofactor biosynthesis global; <br>NAD and NADP cofactor biosynthesis global; <br>NAD and NADP cofactor biosynthesis global		locus|R51_01053		C (cytoplasmic)	C:cytoplasm	Cytoplasmic	Cytoplasmic			0.431964	0
1028	CDS	R51_1	1084267	1082600	95.5805	-1	-	1668	ABC transporter, ATP-binding protein	- none -		locus|R51_01054		C (cytoplasmic)	C:cytoplasm	Cytoplasmic	Cytoplasmic			0.376193	0
1029	CDS	R51_1	1084476	1086413	96.4507	3	+	1938	Soluble lytic murein transglycosylase precursor (EC 3.2.1.-)	Murein Hydrolases		locus|R51_01055		P (Periplasm)	C:extracellular space	Periplasmic	Periplasmic	SP		0.291417	0
1030	CDS	R51_1	1086471	1086797	70.964	3	+	327	Transcriptional repressor protein TrpR	Common Pathway For Synthesis of Aromatic Compounds (DAHP synthase to chorismate); <br>Tryptophan synthesis		locus|R51_01056		C (cytoplasmic)	C:cytoplasm	Cytoplasmic	Cytoplasmic			0.282039	0
1031	CDS	R51_1	1087414	1086899	67.5292	-1	-	516	Inosine/xanthosine triphosphatase (EC 3.6.1.-)	Housecleaning nucleoside triphosphate pyrophosphatases		locus|R51_01057		C (cytoplasmic)	C:cytoplasm	Cytoplasmic	Unknown			0.369401	0
1032	CDS	R51_1	1088976	1088107	87.4284	-3	-	870	Right origin-binding protein	Commensurate regulon activation		locus|R51_01059		C (cytoplasmic)	C:cytoplasm	Cytoplasmic	Cytoplasmic			0.364286	0
1033	CDS	R51_1	1089076	1089183	6.38882	1	+	108	hypothetical protein	- none -		locus|R51_01060		unknown		Cytoplasmic	Unknown		Probable ANTIGEN	0.437158	0
3957	CDS	R51_1	4119953	4120984	91.2755	2	+	1032	FIG01046092: hypothetical protein	- none -		locus|R51_04030		EC (Extracellular)	C:cytoplasm	Extracellular	Unknown	SP	Probable ANTIGEN	0.851751	0	0.3524
1035	CDS	R51_1	1089674	1090363	78.2688	2	+	690	Two-component response regulator CreB	Tolerance to colicin E2		locus|R51_01062		C (cytoplasmic)	C:cytoplasm	Cytoplasmic	Cytoplasmic			0.285451	0
1036	CDS	R51_1	1090363	1091787	90.9091	1	+	1425	Two-component response regulator CreC	Tolerance to colicin E2		locus|R51_01063		IM (inner membrane)	C:plasma membrane	InnerMembrane	CytoplasmicMembrane			0.306287	2
1037	CDS	R51_1	1091845	1093194	90.9091	1	+	1350	Inner membrane protein CreD	Tolerance to colicin E2		locus|R51_01064		IM (inner membrane)	C:plasma membrane	InnerMembrane	CytoplasmicMembrane			0.669175	6
1038	CDS	R51_1	1094145	1093252	90.9091	-3	-	894	Putative major fimbrial subunit	- none -		locus|R51_01065		EC (Extracellular)	C:cytoplasm	Extracellular	Extracellular		Probable ANTIGEN	0.400532	0
4039	CDS	R51_1	4216100	4215342	91.5274	-2	-	759	Uncharacterized lipoprotein YgeR precursor	- none -		locus|R51_04115		EC (Extracellular)	C:extracellular space	Extracellular	OuterMembrane	SP	Probable ANTIGEN	0.540126	0	0.4947
4087	CDS	R51_1	4266520	4265789	93.3822	-1	-	732	Putative outer membrane lipoprotein	- none -		locus|R51_04163		EC (Extracellular)	C:extracellular space	Extracellular	Unknown	SP	Probable ANTIGEN	0.62981	0	0.4822
4362	CDS	R51_1	4540383	4540646	90.1076	3	+	264	probable exported protein YPO3518	- none -		locus|R51_04442		P (Periplasm)	C:extracellular space	Extracellular	Unknown	SP	Probable ANTIGEN	0.58497	0	0.7431	0.994505
1042	CDS	R51_1	1097878	1097498	89.9244	-1	-	381	Putative fimbrial chaperone protein	- none -		locus|R51_01069		EC (Extracellular)	C:cytoplasm	Periplasmic	Periplasmic		Probable ANTIGEN	0.292907	0
1043	CDS	R51_1	1098181	1097996	72.5212	-1	-	186	Putative fimbrial chaperone protein	- none -		locus|R51_01070		OM (Outer Membrane)	C:plasma membrane	Cytoplasmic	Unknown	SP		0.357657	1
4378	CDS	R51_1	4559622	4560626	90.9091	3	+	1005	Putative sulfite oxidase subunit YedY	CBSS-211586.1.peg.1859		locus|R51_04458		P (Periplasm)	C:cytoplasm	Periplasmic	Unknown	SP	Probable ANTIGEN	0.675726	0	0.5478	0.994505
1045	CDS	R51_1	1099807	1099136	88.7337	-1	-	672	putative inner membrane protein	- none -		locus|R51_01072		C (cytoplasmic)	C:cytoplasm	Cytoplasmic	Cytoplasmic			0.610384	0
1046	CDS	R51_1	1100506	1100192	43.5768	-1	-	315	FIG00638667: hypothetical protein	- none -		locus|R51_01073		P (Periplasm)	C:extracellular space	Periplasmic	Unknown	SP		0.538569	1
1047	CDS	R51_1	1101489	1100773	90.7717	-3	-	717	Aerobic respiration control protein arcA	- none -		locus|R51_01074		C (cytoplasmic)	C:cytoplasm	Cytoplasmic	Cytoplasmic			0.86859	0
1048	CDS	R51_1	1102125	1102811	81.7724	3	+	687	tRNA:Cm32/Um32 methyltransferase	RNA methylation; <br>tRNA modification Archaea; <br>tRNA modification Bacteria		locus|R51_01075		unknown	C:cytoplasm	Cytoplasmic	Cytoplasmic			0.452307	0
1049	CDS	R51_1	1103157	1105619	94.115	3	+	2463	Aspartokinase (EC 2.7.2.4) / Homoserine dehydrogenase (EC 1.1.1.3)	CBSS-216591.1.peg.168; <br>Lysine Biosynthesis DAP Pathway; <br>Lysine Biosynthesis DAP Pathway, GJO scratch; <br>Methionine Biosynthesis; <br>Threonine and Homoserine Biosynthesis; <br>Threonine and Homoserine Biosynthesis		locus|R51_01076		C (cytoplasmic)	C:cytoplasm	Cytoplasmic	Cytoplasmic			0.270962	0
1050	CDS	R51_1	1105621	1106550	88.6421	1	+	930	Homoserine kinase (EC 2.7.1.39)	CBSS-269482.1.peg.1294; <br>Methionine Biosynthesis; <br>Threonine and Homoserine Biosynthesis		locus|R51_01077		C (cytoplasmic)	C:cytoplasm	Cytoplasmic	Cytoplasmic		Probable ANTIGEN	0.91739	0
1051	CDS	R51_1	1106554	1107840	90.9091	1	+	1287	Threonine synthase (EC 4.2.3.1)	Threonine and Homoserine Biosynthesis		locus|R51_01078		C (cytoplasmic)	C:cytoplasm	Cytoplasmic	Cytoplasmic			0.667323	0
1052	CDS	R51_1	1108707	1107934	90.0389	-3	-	774	UPF0246 protein YaaA	- none -		locus|R51_01079		C (cytoplasmic)	C:cytoplasm	Cytoplasmic	Cytoplasmic			0.785857	0
1053	CDS	R51_1	1110216	1108786	90.9091	-3	-	1431	Putative alanine/glycine transport protein	- none -		locus|R51_01080		IM (inner membrane)	C:plasma membrane	InnerMembrane	CytoplasmicMembrane			0.731402	9
1054	CDS	R51_1	1110485	1111438	90.9091	2	+	954	Transaldolase (EC 2.2.1.2)	Fructose utilization; <br>Pentose phosphate pathway		locus|R51_01081		C (cytoplasmic)	C:cytoplasm	Cytoplasmic	Cytoplasmic			0.854283	0
1055	CDS	R51_1	1111549	1112139	80.7877	1	+	591	Molybdopterin biosynthesis molybdochelatase MogA	Molybdenum cofactor biosynthesis		locus|R51_01082		C (cytoplasmic)	C:cytoplasm	Cytoplasmic	Cytoplasmic			0.882554	0
1056	CDS	R51_1	1112762	1112196	65.8347	-2	-	567	YaaH protein	- none -		locus|R51_01083		IM (inner membrane)	C:plasma membrane	InnerMembrane	CytoplasmicMembrane			0.571282	6
1057	CDS	R51_1	1113625	1112912	83.4211	-1	-	714	FIG00553873: hypothetical protein	- none -		locus|R51_01084		C (cytoplasmic)	C:cytoplasm	Cytoplasmic	Cytoplasmic			0.737083	0
4509	CDS	R51_1	4713925	4714965	97.733	1	+	1041	Phosphate ABC transporter, periplasmic phosphate-binding protein PstS (TC 3.A.1.7.1)	High affinity phosphate transporter and control of PHO regulon; <br>PhoR-PhoB two-component regulatory system; <br>Phosphate metabolism		locus|R51_04607		unknown	C:extracellular space	Periplasmic	Periplasmic	SP	Probable ANTIGEN	0.849105	1	0.7607	0.994505
1059	CDS	R51_1	1114414	1116330	98.4658	1	+	1917	Chaperone protein DnaK	GroEL GroES; <br>Heat shock dnaK gene cluster extended; <br>Protein chaperones		locus|R51_01086		C (cytoplasmic)	C:cytoplasm	Cytoplasmic	Cytoplasmic			0.491921	0
1060	CDS	R51_1	1116416	1117555	93.1303	2	+	1140	Chaperone protein DnaJ	GroEL GroES; <br>Heat shock dnaK gene cluster extended; <br>Protein chaperones		locus|R51_01087		C (cytoplasmic)	C:cytoplasm	Cytoplasmic	Cytoplasmic			0.337307	0
1061	CDS	R51_1	1117642	1117502	49.897	-1	-	141	hypothetical protein	- none -		locus|R51_01088		unknown	C:outer membrane	Cytoplasmic	Unknown			0.554033	0
1062	CDS	R51_1	1117836	1118783	90.7946	3	+	948	Putative arylsulfatase regulatory protein	- none -		locus|R51_01089		C (cytoplasmic)	C:cytoplasm	OuterMembrane	Cytoplasmic			0.466507	0
1063	CDS	R51_1	1118910	1119254	61.1633	3	+	345	Putative phage protein	- none -		locus|R51_01090		IM (inner membrane)	C:plasma membrane	Cytoplasmic	CytoplasmicMembrane			0.454614	3
1064	CDS	R51_1	1119848	1119315	80.9251	-2	-	534	FIG01045823: hypothetical protein	- none -		locus|R51_01091		C (cytoplasmic)	C:cytoplasm	Cytoplasmic	Cytoplasmic			0.717371	0
1065	CDS	R51_1	1120308	1119865	55.5759	-3	-	444	Putative membrane protein	- none -		locus|R51_01092		C (cytoplasmic)	C:cytoplasm	Cytoplasmic	Unknown			0.452418	1
1066	CDS	R51_1	1120689	1122788	97.7559	3	+	2100	Chitinase (EC 3.2.1.14)	Chitin and N-acetylglucosamine utilization		locus|R51_01093		EC (Extracellular)	C:cytoplasm	OuterMembrane	Unknown			0.526692	0
1067	CDS	R51_1	1122880	1123638	90.9091	1	+	759	Putative hydroxymethyltransferase	- none -		locus|R51_01094		EC (Extracellular)	C:cytoplasm	Extracellular	Extracellular		Probable ANTIGEN	0.481895	0
1068	CDS	R51_1	1123744	1125876	90.9091	1	+	2133	Putative hydroxymethyltransferase	- none -		locus|R51_01095		OM (Outer Membrane)	C:cytoplasm	Periplasmic	Unknown			0.681421	0
1069	CDS	R51_1	1126157	1126861	90.7717	2	+	705	FIG074102: hypothetical protein	- none -		locus|R51_01096		C (cytoplasmic)	C:cytoplasm	Cytoplasmic	Unknown			0.465968	0
4610	CDS	R51_3	11207	10476	97.8704	-2	-	732	IncF plasmid conjugative transfer surface exclusion protein TraT	Conjugative transfer; <br>IncF Conjugal Transfer System		locus|R51_04708		P (Periplasm)	C:extracellular space	Extracellular	OuterMembrane	SP	Probable ANTIGEN	0.616485	0	0.711
1071	CDS	R51_1	1127934	1128620	90.9091	3	+	687	chaperone FimC	Type 1 pili (mannose-sensitive fimbriae, gamma-fimbriae)		locus|R51_01098		P (Periplasm)	C:plasma membrane	Periplasmic	Periplasmic	SP		0.371496	1
4620	CDS	R51_3	19861	19223	90.9091	-1	-	639	IncF plasmid conjugative transfer protein TrbC	Conjugative transfer; <br>IncF Conjugal Transfer System		locus|R51_04718		P (Periplasm)	C:extracellular space	Periplasmic	Periplasmic	SP	Probable ANTIGEN	0.562126	1	0.724
77	CDS	R51_1	80938	78071	93.7028	-1	-	2868	autotransporter	- none -		locus|R51_00077		OM (Outer Membrane)	C:extracellular space	Extracellular	OuterMembrane	SP	Probable ANTIGEN	0.419304	1	0.6905
1074	CDS	R51_1	1132283	1132798	91.7106	2	+	516	type 1 fimbrae adaptor subunit FimF	Type 1 pili (mannose-sensitive fimbriae, gamma-fimbriae)		locus|R51_01101		EC (Extracellular)	C:outer membrane	Extracellular	Extracellular		Probable ANTIGEN	0.398142	0
131	CDS	R51_1	135557	134274	96.8857	-2	-	1284	Periplasmic septal ring factor with murein hydrolase activity EnvC/YibP	Glutaredoxins; <br>Phosphoglycerate mutase protein family		locus|R51_00132		OM (Outer Membrane)	C:cytoplasm	OuterMembrane	OuterMembrane	SP	Probable ANTIGEN	0.368357	1
1076	CDS	R51_1	1133298	1134029	82.2075	3	+	732	Hypothetical fimbrial chaperone ycbF precursor	- none -		locus|R51_01103		P (Periplasm)	C:plasma membrane	Periplasmic	Unknown	SP		0.273892	1
1077	CDS	R51_1	1134093	1134938	90.9091	3	+	846	FIG01200701: possible membrane protein	- none -		locus|R51_01104		unknown	C:extracellular space	Periplasmic	Unknown	SP		0.286694	0
1078	CDS	R51_1	1134977	1135264	65.9263	2	+	288	Putative membrane protein	- none -		locus|R51_01105		C (cytoplasmic)	C:outer membrane	Cytoplasmic	Unknown	SP		0.603331	0
1079	CDS	R51_1	1135813	1135364	13.6936	-1	-	450	Putative membrane protein	- none -		locus|R51_01106		IM (inner membrane)	C:plasma membrane	Cytoplasmic	Unknown			0.345067	1
1080	CDS	R51_1	1136183	1137187	90.9091	2	+	1005	Putative LysR family transcriptional regulator	- none -		locus|R51_01107		C (cytoplasmic)	C:cytoplasm	Cytoplasmic	Cytoplasmic			0.45638	0
1081	CDS	R51_1	1137635	1137195	51.248	-2	-	441	Putative transcription regulator	- none -		locus|R51_01108		IM (inner membrane)	C:plasma membrane	Cytoplasmic	Unknown			0.428087	1
1082	CDS	R51_1	1138157	1139875	91.2068	2	+	1719	Possible sulfatase	- none -		locus|R51_01109		C (cytoplasmic)	C:cytoplasm	Extracellular	Unknown		Probable ANTIGEN	0.512338	0
1083	CDS	R51_1	1141483	1139921	96.6338	-1	-	1563	5&#39;-nucleotidase (EC 3.1.3.5)	Purine conversions; <br>pyrimidine conversions		locus|R51_01110		EC (Extracellular)	C:extracellular space	Periplasmic	Periplasmic	SP		0.378697	0
1084	CDS	R51_1	1142352	1141591	90.9091	-3	-	762	FIG01200701: possible membrane protein	- none -		locus|R51_01111		OM (Outer Membrane)	C:extracellular space	OuterMembrane	Unknown	SP		0.329708	0
1085	CDS	R51_1	1142946	1144439	96.2904	3	+	1494	Choline-sulfatase (EC 3.1.6.6)	Choline and Betaine Uptake and Betaine Biosynthesis		locus|R51_01112		P (Periplasm)	C:extracellular space	Periplasmic	Unknown	SP		0.400224	1
1086	CDS	R51_1	1144538	1145728	90.9091	2	+	1191	putative arylsulfatase regulator	- none -		locus|R51_01113		C (cytoplasmic)	C:cytoplasm	Cytoplasmic	Cytoplasmic			0.428991	0
1087	CDS	R51_1	1145753	1147000	90.9091	2	+	1248	FIG074102: hypothetical protein	- none -		locus|R51_01114		P (Periplasm)	C:cytoplasm	Cytoplasmic	Unknown			0.525329	0
1088	CDS	R51_1	1147127	1148314	90.9091	2	+	1188	Possible sulfatase	- none -		locus|R51_01115		C (cytoplasmic)	C:cytoplasm	Extracellular	Unknown			0.409692	0
1089	CDS	R51_1	1148375	1148842	90.1076	2	+	468	Possible sulfatase	- none -		locus|R51_01116		C (cytoplasmic)	C:cytoplasm	Extracellular	Unknown			0.366205	0
1090	CDS	R51_1	1149005	1150171	84.1081	2	+	1167	Na+/H+ antiporter NhaA type	NhaA, NhaD and Sodium-dependent phosphate transporters		locus|R51_01117		IM (inner membrane)	C:plasma membrane	InnerMembrane	CytoplasmicMembrane			0.430351	11
1091	CDS	R51_1	1150239	1151132	80.8106	3	+	894	Transcriptional activator NhaR	NhaA, NhaD and Sodium-dependent phosphate transporters		locus|R51_01118		C (cytoplasmic)	C:cytoplasm	Cytoplasmic	Cytoplasmic			0.358461	0
1092	CDS	R51_1	1153106	1151187	92.9471	-2	-	1920	Alpha-xylosidase (EC 3.2.1.-)	Xylose utilization		locus|R51_01119		C (cytoplasmic)	C:cytoplasm	Cytoplasmic	Cytoplasmic			0.328133	0
1093	CDS	R51_1	1153931	1153266	88.9856	-2	-	666	Xyloside transporter XynT	Xylose utilization		locus|R51_01120		IM (inner membrane)	C:plasma membrane	InnerMembrane	CytoplasmicMembrane			0.289965	6
1094	CDS	R51_1	1154638	1153928	72.9105	-1	-	711	Xyloside transporter XynT	Xylose utilization		locus|R51_01121		IM (inner membrane)	C:plasma membrane	InnerMembrane	CytoplasmicMembrane			0.272376	5
1095	CDS	R51_1	1155356	1155093	45.2714	-2	-	264	SSU ribosomal protein S20p	Ribosome SSU bacterial		locus|R51_01122		P (Periplasm)	C:cytoplasm	Periplasmic	Cytoplasmic		Probable ANTIGEN	0.447592	0
1096	CDS	R51_1	1155685	1156623	90.7946	1	+	939	Riboflavin kinase (EC 2.7.1.26) / FMN adenylyltransferase (EC 2.7.7.2)	Riboflavin, FMN and FAD metabolism; <br>Riboflavin, FMN and FAD metabolism; <br>Riboflavin, FMN and FAD metabolism in plants; <br>Riboflavin, FMN and FAD metabolism in plants; <br>riboflavin to FAD; <br>riboflavin to FAD		locus|R51_01123		C (cytoplasmic)	C:cytoplasm	Cytoplasmic	Cytoplasmic			0.339587	0
1097	CDS	R51_1	1156668	1159502	96.0385	3	+	2835	Isoleucyl-tRNA synthetase (EC 6.1.1.5)	tRNA aminoacylation, Ile		locus|R51_01124		C (cytoplasmic)	C:cytoplasm	Cytoplasmic	Cytoplasmic			0.518295	0
1098	CDS	R51_1	1159502	1160002	80.49	2	+	501	Lipoprotein signal peptidase (EC 3.4.23.36)	Lipoprotein Biosynthesis; <br>Signal peptidase		locus|R51_01125		IM (inner membrane)	C:plasma membrane	InnerMembrane	CytoplasmicMembrane			0.307026	4
1099	CDS	R51_1	1160157	1160606	72.4754	3	+	450	FKBP-type peptidyl-prolyl cis-trans isomerase SlpA (EC 5.2.1.8)	Peptidyl-prolyl cis-trans isomerase		locus|R51_01126		C (cytoplasmic)	C:cytoplasm	Cytoplasmic	Unknown			0.2233	0
1100	CDS	R51_1	1160609	1161559	90.9091	2	+	951	4-hydroxy-3-methylbut-2-enyl diphosphate reductase (EC 1.17.1.2)	Isoprenoid Biosynthesis; <br>Nonmevalonate Branch of Isoprenoid Biosynthesis		locus|R51_01127		C (cytoplasmic)	C:cytoplasm	Cytoplasmic	Cytoplasmic			0.340771	0
1101	CDS	R51_1	1161759	1162961	93.1532	3	+	1203	Putative nitrite reductase	- none -		locus|R51_01128		P (Periplasm)	C:extracellular space	Periplasmic	Cytoplasmic	SP		0.30672	0
1102	CDS	R51_1	1162977	1163897	84.9782	3	+	921	Inosine-uridine preferring nucleoside hydrolase (EC 3.2.2.1)	Purine conversions; <br>Queuosine-Archaeosine Biosynthesis		locus|R51_01129		unknown	C:cytoplasm	Cytoplasmic	Unknown			0.342214	0
1103	CDS	R51_1	1164605	1163919	82.8257	-2	-	687	Transcriptional regulatory protein CitB, DpiA	CitAB; <br>Citrate Metabolism, Transport, and Regulation; <br>Orphan regulatory proteins		locus|R51_01130		C (cytoplasmic)	C:cytoplasm	Cytoplasmic	Cytoplasmic			0.426555	0
1104	CDS	R51_1	1166265	1164607	90.9091	-3	-	1659	Sensor kinase CitA, DpiB (EC 2.7.3.-)	CitAB; <br>Citrate Metabolism, Transport, and Regulation; <br>Orphan regulatory proteins		locus|R51_01131		IM (inner membrane)	C:plasma membrane	InnerMembrane	CytoplasmicMembrane			0.385463	2
1105	CDS	R51_1	1167663	1166272	90.9091	-3	-	1392	Oxaloacetate decarboxylase beta chain (EC 4.1.1.3)	Na+ translocating decarboxylases and related biotin-dependent enzymes; <br>Pyruvate metabolism I: anaplerotic reactions, PEP		locus|R51_01132		IM (inner membrane)	C:plasma membrane	InnerMembrane	CytoplasmicMembrane			0.413567	8
1106	CDS	R51_1	1169445	1167676	91.2755	-3	-	1770	Oxaloacetate decarboxylase alpha chain (EC 4.1.1.3)	Na+ translocating decarboxylases and related biotin-dependent enzymes; <br>Pyruvate metabolism I: anaplerotic reactions, PEP		locus|R51_01133		unknown	C:cytoplasm	Cytoplasmic	Cytoplasmic			0.336523	0
1107	CDS	R51_1	1169701	1169462	26.3339	-1	-	240	Oxaloacetate decarboxylase gamma chain (EC 4.1.1.3)	Na+ translocating decarboxylases and related biotin-dependent enzymes; <br>Pyruvate metabolism I: anaplerotic reactions, PEP		locus|R51_01134		IM (inner membrane)	C:plasma membrane	InnerMembrane	CytoplasmicMembrane			0.544369	1
1108	CDS	R51_1	1171200	1169860	90.9091	-3	-	1341	Na(+)Citrate OH(-) antiporter	Citrate Metabolism, Transport, and Regulation		locus|R51_01135		IM (inner membrane)	C:plasma membrane	InnerMembrane	CytoplasmicMembrane			0.341254	12
1109	CDS	R51_1	1171520	1172488	90.8862	2	+	969	[Citrate [pro-3S]-lyase] ligase (EC 6.2.1.22)	Citrate Metabolism, Transport, and Regulation		locus|R51_01136		C (cytoplasmic)	C:cytoplasm	Cytoplasmic	Cytoplasmic			0.456842	0
1110	CDS	R51_1	1172518	1172811	42.4548	1	+	294	Citrate lyase beta chain (EC 4.1.3.6)	Citrate Metabolism, Transport, and Regulation		locus|R51_01137		C (cytoplasmic)	C:cytoplasm	Cytoplasmic	Cytoplasmic			0.418909	0
1111	CDS	R51_1	1172808	1173344	87.6803	3	+	537	Citrate lyase beta chain (EC 4.1.3.6)	Citrate Metabolism, Transport, and Regulation		locus|R51_01138		unknown	C:cytoplasm	Cytoplasmic	Cytoplasmic	SP		0.663757	0
1112	CDS	R51_1	1173356	1173601	60.9801	2	+	246	Citrate lyase beta chain (EC 4.1.3.6)	Citrate Metabolism, Transport, and Regulation		locus|R51_01139		C (cytoplasmic)	C:cytoplasm	Cytoplasmic	Cytoplasmic		Probable ANTIGEN	0.624498	0
1113	CDS	R51_1	1173612	1175132	94.4355	3	+	1521	Citrate lyase alpha chain (EC 4.1.3.6)	Citrate Metabolism, Transport, and Regulation		locus|R51_01140		C (cytoplasmic)	C:cytoplasm	Cytoplasmic	Cytoplasmic			0.577472	0
1114	CDS	R51_1	1175132	1175683	64.5294	2	+	552	Apo-citrate lyase phosphoribosyl-dephospho-CoA transferase (EC 2.7.7.61)	Citrate Metabolism, Transport, and Regulation		locus|R51_01141		C (cytoplasmic)	C:cytoplasm	Cytoplasmic	Cytoplasmic			0.442234	0
1115	CDS	R51_1	1175661	1176569	88.5963	3	+	909	2-(5&#39;&#39;-triphosphoribosyl)-3&#39;-dephosphocoenzyme-A synthase (EC 2.7.8.25)	Citrate Metabolism, Transport, and Regulation		locus|R51_01142		C (cytoplasmic)	C:cytoplasm	Cytoplasmic	Unknown			0.447552	0
1116	CDS	R51_1	1176749	1177570	90.7946	2	+	822	4-hydroxy-tetrahydrodipicolinate reductase (EC 1.17.1.8)	Lysine Biosynthesis DAP Pathway; <br>Lysine Biosynthesis DAP Pathway, GJO scratch		locus|R51_01143		C (cytoplasmic)	C:cytoplasm	Cytoplasmic	Cytoplasmic			0.636041	0
1117	CDS	R51_1	1178421	1179581	90.9091	3	+	1161	Carbamoyl-phosphate synthase small chain (EC 6.3.5.5)	De Novo Pyrimidine Synthesis; <br>Macromolecular synthesis operon		locus|R51_01144		C (cytoplasmic)	C:cytoplasm	Cytoplasmic	Cytoplasmic			0.353932	0
1118	CDS	R51_1	1179600	1182827	95.466	3	+	3228	Carbamoyl-phosphate synthase large chain (EC 6.3.5.5)	De Novo Pyrimidine Synthesis; <br>Macromolecular synthesis operon		locus|R51_01145		C (cytoplasmic)	C:cytoplasm	Cytoplasmic	Unknown	SP		0.406682	0
1119	CDS	R51_1	1183100	1183495	48.4314	2	+	396	Transcriptional activatory protein CaiF	Carnitine Metabolism in Microorganisms		locus|R51_01146		C (cytoplasmic)	C:cytoplasm	Cytoplasmic	Cytoplasmic			0.459375	0
1120	CDS	R51_1	1184169	1183573	90.2908	-3	-	597	Carnitine operon protein CaiE	Carnitine Metabolism in Microorganisms		locus|R51_01147		C (cytoplasmic)	C:cytoplasm	Cytoplasmic	Cytoplasmic			0.482245	0
1121	CDS	R51_1	1185064	1184279	90.7717	-1	-	786	Carnitine racemase (EC 5.-.-.-) / Carnitinyl-CoA dehydratase (EC 4.2.1.-)	Carnitine Metabolism in Microorganisms; <br>Carnitine Metabolism in Microorganisms		locus|R51_01148		C (cytoplasmic)	C:cytoplasm	Cytoplasmic	Cytoplasmic			0.342968	0
1122	CDS	R51_1	1186671	1185118	90.932	-3	-	1554	Crotonobetaine carnitine-CoA ligase (EC 6.3.2.-)	Carnitine Metabolism in Microorganisms		locus|R51_01149		C (cytoplasmic)	C:cytoplasm	Cytoplasmic	Cytoplasmic			0.436477	0
1123	CDS	R51_1	1187951	1186734	90.9091	-2	-	1218	Crotonobetainyl-CoA:carnitine CoA-transferase (EC 2.8.3.-)	Carnitine Metabolism in Microorganisms		locus|R51_01150		C (cytoplasmic)	C:cytoplasm	Cytoplasmic	Cytoplasmic			0.439115	0
1124	CDS	R51_1	1189205	1188063	90.9091	-2	-	1143	Crotonobetainyl-CoA dehydrogenase (EC 1.3.99.-)	Carnitine Metabolism in Microorganisms		locus|R51_01151		C (cytoplasmic)	C:cytoplasm	Cytoplasmic	Cytoplasmic			0.59933	0
1125	CDS	R51_1	1190757	1189252	90.9091	-3	-	1506	L-carnitine/gamma-butyrobetaine antiporter	Carnitine Metabolism in Microorganisms		locus|R51_01152		IM (inner membrane)	C:plasma membrane	InnerMembrane	CytoplasmicMembrane			0.493099	12
1126	CDS	R51_1	1191238	1192008	90.9091	1	+	771	Electron transfer flavoprotein, beta subunit FixA	Carnitine Metabolism in Microorganisms		locus|R51_01153		C (cytoplasmic)	C:cytoplasm	Cytoplasmic	Unknown			0.410244	0
1127	CDS	R51_1	1192024	1192965	90.9091	1	+	942	Electron transfer flavoprotein, alpha subunit FixB	Carnitine Metabolism in Microorganisms		locus|R51_01154		C (cytoplasmic)	C:cytoplasm	Cytoplasmic	Unknown			0.269062	0
1128	CDS	R51_1	1193015	1194301	90.9091	2	+	1287	Probable electron transfer flavoprotein-quinone oxidoreductase FixC (EC 1.5.5.-)	Acetyl-CoA fermentation to Butyrate		locus|R51_01155		C (cytoplasmic)	C:cytoplasm	Cytoplasmic	Cytoplasmic			0.282265	0
1129	CDS	R51_1	1194298	1194585	66.1782	1	+	288	Ferredoxin-like protein FixX	Acetyl-CoA fermentation to Butyrate		locus|R51_01156		C (cytoplasmic)	C:cytoplasm	Cytoplasmic	Unknown			0.475379	0
1130	CDS	R51_1	1194732	1196072	90.6572	3	+	1341	Putative metabolite transport protein yaaU	- none -		locus|R51_01157		IM (inner membrane)	C:plasma membrane	InnerMembrane	CytoplasmicMembrane			0.59606	11
1131	CDS	R51_1	1196161	1196391	81.9556	1	+	231	probable lipoprotein	- none -		locus|R51_01158		P (Periplasm)	C:extracellular space	Extracellular	Unknown	SP		0.414847	0
174	CDS	R51_1	184149	184973	90.9091	3	+	825	BAX protein	- none -		locus|R51_00175		EC (Extracellular)	C:extracellular space	OuterMembrane	Unknown	SP	Probable ANTIGEN	0.444125	0
1133	CDS	R51_1	1197613	1197323	79.4367	-1	-	291	Probable secreted protein	- none -		locus|R51_01160		P (Periplasm)	C:extracellular space	Periplasmic	Unknown	SP		0.407049	0
1134	CDS	R51_1	1198511	1199440	90.9091	2	+	930	Choline-sulfatase (EC 3.1.6.6)	Choline and Betaine Uptake and Betaine Biosynthesis		locus|R51_01161		P (Periplasm)	C:cytoplasm	Periplasmic	Unknown	SP		0.446385	0
1135	CDS	R51_1	1199684	1200400	90.7488	2	+	717	Choline-sulfatase (EC 3.1.6.6)	Choline and Betaine Uptake and Betaine Biosynthesis		locus|R51_01162		C (cytoplasmic)	C:cytoplasm	Cytoplasmic	Cytoplasmic			0.385365	0
1136	CDS	R51_1	1200807	1201337	86.0774	3	+	531	Glutathione-regulated potassium-efflux system ancillary protein KefF	Glutathione-regulated potassium-efflux system and associated functions; <br>Potassium homeostasis		locus|R51_01163		unknown	C:cytoplasm	Cytoplasmic	Cytoplasmic			0.465003	0
1137	CDS	R51_1	1201330	1203192	90.9091	1	+	1863	Glutathione-regulated potassium-efflux system protein KefC	Potassium homeostasis		locus|R51_01164		IM (inner membrane)	C:plasma membrane	InnerMembrane	CytoplasmicMembrane			0.461661	13
1138	CDS	R51_1	1203391	1203870	90.7946	1	+	480	Dihydrofolate reductase (EC 1.5.1.3)	5-FCL-like protein; <br>EC49-61; <br>Folate Biosynthesis		locus|R51_01165		C (cytoplasmic)	C:cytoplasm	Cytoplasmic	Periplasmic			0.652874	0
1139	CDS	R51_1	1204824	1203976	88.4589	-3	-	849	Bis(5&#39;-nucleosyl)-tetraphosphatase, symmetrical (EC 3.6.1.41)	EC49-61; <br>Possible RNA modification and stress response cluster		locus|R51_01166		C (cytoplasmic)	C:cytoplasm	Cytoplasmic	Cytoplasmic			0.350259	0
1140	CDS	R51_1	1205212	1204835	69.2695	-1	-	378	ApaG protein	EC49-61; <br>Possible RNA modification and stress response cluster		locus|R51_01167		C (cytoplasmic)	C:cytoplasm	Cytoplasmic	Unknown		Probable ANTIGEN	0.845699	0
1141	CDS	R51_1	1206036	1205215	90.9091	-3	-	822	SSU rRNA (adenine(1518)-N(6)/adenine(1519)-N(6))-dimethyltransferase (EC 2.1.1.182)	EC49-61; <br>ECSIG4-SIG7; <br>Possible RNA modification and stress response cluster; <br>RNA methylation; <br>Ribosome biogenesis bacterial		locus|R51_01168		C (cytoplasmic)	C:cytoplasm	Periplasmic	Cytoplasmic			0.410492	0
1142	CDS	R51_1	1207022	1206033	90.0618	-2	-	990	4-hydroxythreonine-4-phosphate dehydrogenase (EC 1.1.1.262)	EC49-61; <br>ECSIG4-SIG7; <br>Possible RNA modification and stress response cluster; <br>Pyridoxin (Vitamin B6) Biosynthesis		locus|R51_01169		unknown	C:cytoplasm	Cytoplasmic	Cytoplasmic		Probable ANTIGEN	0.380819	0
1143	CDS	R51_1	1208308	1207022	97.7788	-1	-	1287	Survival protein SurA precursor (Peptidyl-prolyl cis-trans isomerase SurA) (EC 5.2.1.8)	EC49-61; <br>ECSIG4-SIG7; <br>Lipopolysaccharide assembly; <br>Peptidyl-prolyl cis-trans isomerase; <br>Periplasmic Stress Response; <br>Possible RNA modification and stress response cluster		locus|R51_01170		unknown	C:extracellular space	Periplasmic	Periplasmic	SP		0.331084	0
180	CDS	R51_1	191169	191465	87.3368	3	+	297	Uncharacterized lipoprotein YsaB precursor	- none -		locus|R51_00181		P (Periplasm)	C:outer membrane	Periplasmic	Unknown	SP	Probable ANTIGEN	0.323655	0
1145	CDS	R51_1	1210976	1211788	90.3824	2	+	813	DnaJ-like protein DjlA	EC49-61; <br>Possible RNA modification and stress response cluster; <br>Rcs phosphorelay signal transduction pathway		locus|R51_01172		IM (inner membrane)	C:plasma membrane	Periplasmic	Cytoplasmic			0.283449	1
1146	CDS	R51_1	1212542	1211883	86.9247	-2	-	660	Ribosomal large subunit pseudouridine synthase A (EC 4.2.1.70)	EC49-61; <br>RNA pseudouridine syntheses; <br>Ribosome biogenesis bacterial; <br>tRNA modification Bacteria		locus|R51_01173		C (cytoplasmic)	C:cytoplasm	Cytoplasmic	Cytoplasmic			0.325189	0
1147	CDS	R51_1	1215460	1212554	91.2755	-1	-	2907	RNA polymerase associated protein RapA (EC 3.6.1.-)	CBSS-326442.4.peg.1852; <br>EC49-61		locus|R51_01174		C (cytoplasmic)	C:cytoplasm	Cytoplasmic	Cytoplasmic			0.422351	0
1148	CDS	R51_1	1217985	1215634	94.8935	-3	-	2352	DNA polymerase II (EC 2.7.7.7)	DNA Repair Base Excision; <br>EC49-61		locus|R51_01175		C (cytoplasmic)	C:cytoplasm	Cytoplasmic	Cytoplasmic			0.242772	0
1149	CDS	R51_1	1218649	1218029	57.9116	-1	-	621	FIG01046907: hypothetical protein	- none -		locus|R51_01176		IM (inner membrane)	C:plasma membrane	InnerMembrane	CytoplasmicMembrane		Probable ANTIGEN	0.277031	1
1150	CDS	R51_1	1219167	1219586	47.8131	3	+	420	FIG01045455: hypothetical protein	- none -		locus|R51_01177		C (cytoplasmic)	C:cytoplasm	Extracellular	Unknown			0.398481	0
1151	CDS	R51_1	1220287	1219592	83.4211	-1	-	696	L-ribulose-5-phosphate 4-epimerase (EC 5.1.3.4)	L-Arabinose utilization; <br>L-ascorbate utilization (and related gene clusters)		locus|R51_01178		C (cytoplasmic)	C:cytoplasm	Cytoplasmic	Cytoplasmic			0.353343	0
1152	CDS	R51_1	1221930	1220428	90.9091	-3	-	1503	L-arabinose isomerase (EC 5.3.1.4)	L-Arabinose utilization		locus|R51_01179		C (cytoplasmic)	C:cytoplasm	Cytoplasmic	Cytoplasmic			0.278508	0
1153	CDS	R51_1	1223650	1221941	90.9091	-1	-	1710	Ribulokinase (EC 2.7.1.16)	L-Arabinose utilization		locus|R51_01180		C (cytoplasmic)	C:cytoplasm	Cytoplasmic	Cytoplasmic			0.404266	0
1154	CDS	R51_1	1223990	1224835	83.2379	2	+	846	Arabinose operon regulatory protein	L-Arabinose utilization		locus|R51_01181		C (cytoplasmic)	C:cytoplasm	Cytoplasmic	Cytoplasmic			0.299627	0
1155	CDS	R51_1	1224954	1225721	72.7502	3	+	768	DedA family inner membrane protein YabI	DedA family of inner membrane proteins		locus|R51_01182		IM (inner membrane)	C:plasma membrane	InnerMembrane	CytoplasmicMembrane			0.466166	5
1156	CDS	R51_1	1226467	1225760	81.7266	-1	-	708	Thiamin ABC transporter, ATPase component / Thiamine transport ATP-binding protein thiQ	Thiamin biosynthesis		locus|R51_01183		C (cytoplasmic)	C:cytoplasm	InnerMembrane	CytoplasmicMembrane			0.386496	0
1157	CDS	R51_1	1228061	1226451	90.9091	-2	-	1611	Thiamin ABC transporter, transmembrane component	Thiamin biosynthesis		locus|R51_01184		IM (inner membrane)	C:plasma membrane	InnerMembrane	CytoplasmicMembrane			0.394421	12
1158	CDS	R51_1	1229020	1228037	97.4811	-1	-	984	Thiamin ABC transporter, substrate-binding component	Thiamin biosynthesis		locus|R51_01185		P (Periplasm)	C:extracellular space	Periplasmic	Periplasmic	SP		0.329371	0
1159	CDS	R51_1	1230856	1229198	90.9091	-1	-	1659	SgrR, sugar-phosphate stress, transcriptional activator of SgrS small RNA	Sugar-phosphate stress regulation		locus|R51_01186		C (cytoplasmic)	C:cytoplasm	Cytoplasmic	Cytoplasmic			0.492128	0
1160	CDS	R51_1	1230949	1231071	40.8747	1	+	123	Sugar-phosphate stress protein SgrT (embedded in SgrS)	Sugar-phosphate stress regulation		locus|R51_01187		unknown	C:cytoplasm	Cytoplasmic	Unknown			0.342612	0
199	CDS	R51_1	210582	211661	97.6872	3	+	1080	Putative fimbrial protein	- none -		locus|R51_00200		EC (Extracellular)	C:extracellular space	Extracellular	Extracellular	SP	Probable ANTIGEN	0.285164	0	0.5507
1162	CDS	R51_1	1232330	1231725	89.7183	-2	-	606	3-isopropylmalate dehydratase small subunit (EC 4.2.1.33)	Branched-Chain Amino Acid Biosynthesis; <br>Leucine Biosynthesis		locus|R51_01189		C (cytoplasmic)	C:cytoplasm	Cytoplasmic	Cytoplasmic			0.357034	0
1163	CDS	R51_1	1233741	1232341	91.8937	-3	-	1401	3-isopropylmalate dehydratase large subunit (EC 4.2.1.33)	Branched-Chain Amino Acid Biosynthesis; <br>Leucine Biosynthesis		locus|R51_01190		C (cytoplasmic)	C:cytoplasm	Cytoplasmic	Cytoplasmic			0.28742	0
1164	CDS	R51_1	1234835	1233744	90.9091	-2	-	1092	3-isopropylmalate dehydrogenase (EC 1.1.1.85)	Branched-Chain Amino Acid Biosynthesis; <br>Leucine Biosynthesis		locus|R51_01191		C (cytoplasmic)	C:cytoplasm	Cytoplasmic	Cytoplasmic			0.313892	0
1165	CDS	R51_1	1236406	1235039	91.7106	-1	-	1368	2-isopropylmalate synthase (EC 2.3.3.13)	Branched-Chain Amino Acid Biosynthesis; <br>Leucine Biosynthesis		locus|R51_01192		unknown	C:cytoplasm	Cytoplasmic	Cytoplasmic			0.305192	0
1166	CDS	R51_1	1237237	1238181	89.5809	1	+	945	Probable transcriptional activator for leuABCD operon	Leucine Biosynthesis; <br>LysR-family proteins in Escherichia coli		locus|R51_01193		C (cytoplasmic)	C:cytoplasm	Cytoplasmic	Cytoplasmic			0.552632	0
1167	CDS	R51_1	1238509	1239156	89.2604	1	+	648	Acetolactate synthase large subunit (EC 2.2.1.6)	Acetolactate synthase subunits; <br>Branched-Chain Amino Acid Biosynthesis		locus|R51_01194		C (cytoplasmic)	C:cytoplasm	Cytoplasmic	CytoplasmicMembrane		Probable ANTIGEN	0.248838	0
1168	CDS	R51_1	1239099	1240226	90.9091	3	+	1128	Acetolactate synthase large subunit (EC 2.2.1.6)	Acetolactate synthase subunits; <br>Branched-Chain Amino Acid Biosynthesis		locus|R51_01195		unknown	C:cytoplasm	Periplasmic	Cytoplasmic	SP		0.347839	0
1169	CDS	R51_1	1240226	1240720	84.2455	2	+	495	Acetolactate synthase small subunit (EC 2.2.1.6)	Acetolactate synthase subunits; <br>Branched-Chain Amino Acid Biosynthesis		locus|R51_01196		C (cytoplasmic)	C:cytoplasm	Cytoplasmic	Cytoplasmic			0.370378	0
1170	CDS	R51_1	1241004	1242008	90.9091	3	+	1005	Fructose repressor FruR, LacI family	Fructose utilization		locus|R51_01197		C (cytoplasmic)	C:cytoplasm	Cytoplasmic	Cytoplasmic			0.295944	0
1171	CDS	R51_1	1242614	1243072	88.8482	2	+	459	Cell division protein MraZ	16S rRNA modification within P site of ribosome; <br>Bacterial Cell Division; <br>Bacterial Cytoskeleton		locus|R51_01198		C (cytoplasmic)	C:cytoplasm	Cytoplasmic	Cytoplasmic			0.279348	0
1172	CDS	R51_1	1243074	1244015	90.9091	3	+	942	rRNA small subunit methyltransferase H	16S rRNA modification within P site of ribosome; <br>Bacterial Cell Division		locus|R51_01199		C (cytoplasmic)	C:cytoplasm	Cytoplasmic	Cytoplasmic			0.31062	0
1173	CDS	R51_1	1244012	1244377	56.2171	2	+	366	Cell division protein FtsL	16S rRNA modification within P site of ribosome; <br>Bacterial Cell Division; <br>Bacterial Cytoskeleton; <br>Stationary phase repair cluster		locus|R51_01200		IM (inner membrane)	C:plasma membrane	Cytoplasmic	Cytoplasmic			0.358372	1
1174	CDS	R51_1	1244393	1246159	95.9469	2	+	1767	Cell division protein FtsI [Peptidoglycan synthetase] (EC 2.4.1.129)	16S rRNA modification within P site of ribosome; <br>Bacterial Cell Division; <br>Bacterial Cytoskeleton; <br>CBSS-83331.1.peg.3039; <br>Peptidoglycan Biosynthesis		locus|R51_01201		IM (inner membrane)	C:plasma membrane	OuterMembrane	CytoplasmicMembrane			0.474777	1
1175	CDS	R51_1	1246146	1247633	90.9091	3	+	1488	UDP-N-acetylmuramoylalanyl-D-glutamate--2,6-diaminopimelate ligase (EC 6.3.2.13)	Peptidoglycan Biosynthesis; <br>Peptidoglycan biosynthesis--gjo		locus|R51_01202		C (cytoplasmic)	C:cytoplasm	Cytoplasmic	Cytoplasmic			0.505466	0
1176	CDS	R51_1	1247630	1248988	90.932	2	+	1359	UDP-N-acetylmuramoylalanyl-D-glutamyl-2,6-diaminopimelate--D-alanyl-D-alanine ligase (EC 6.3.2.10)	Peptidoglycan Biosynthesis; <br>Peptidoglycan biosynthesis--gjo		locus|R51_01203		C (cytoplasmic)	C:cytoplasm	Cytoplasmic	Cytoplasmic			0.54125	0
1177	CDS	R51_1	1248982	1250064	80.6961	1	+	1083	Phospho-N-acetylmuramoyl-pentapeptide-transferase (EC 2.7.8.13)	Peptidoglycan Biosynthesis		locus|R51_01204		IM (inner membrane)	C:plasma membrane	InnerMembrane	CytoplasmicMembrane			0.609805	10
1178	CDS	R51_1	1250067	1251383	90.9091	3	+	1317	UDP-N-acetylmuramoylalanine--D-glutamate ligase (EC 6.3.2.9)	Peptidoglycan Biosynthesis; <br>Peptidoglycan biosynthesis--gjo		locus|R51_01205		C (cytoplasmic)	C:cytoplasm	Cytoplasmic	Unknown			0.262047	1
1179	CDS	R51_1	1251383	1252627	90.9091	2	+	1245	Cell division protein FtsW	Bacterial Cell Division; <br>Bacterial Cytoskeleton; <br>cell division cluster containing FtsQ		locus|R51_01206		IM (inner membrane)	C:plasma membrane	InnerMembrane	CytoplasmicMembrane			0.279858	10
1180	CDS	R51_1	1252624	1253691	90.9091	1	+	1068	UDP-N-acetylglucosamine--N-acetylmuramyl-(pentapeptide) pyrophosphoryl-undecaprenol N-acetylglucosamine transferase (EC 2.4.1.227)	Peptidoglycan Biosynthesis; <br>cell division core of larger cluster		locus|R51_01207		C (cytoplasmic)	C:cytoplasm	Cytoplasmic	CytoplasmicMembrane			0.347936	0
1181	CDS	R51_1	1253810	1255285	90.9091	2	+	1476	UDP-N-acetylmuramate--alanine ligase (EC 6.3.2.8)	Peptidoglycan Biosynthesis; <br>Peptidoglycan biosynthesis--gjo; <br>cell division cluster containing FtsQ		locus|R51_01208		C (cytoplasmic)	C:cytoplasm	Cytoplasmic	Cytoplasmic		Probable ANTIGEN	0.349969	0
1182	CDS	R51_1	1255278	1256036	89.7183	3	+	759	D-alanine--D-alanine ligase (EC 6.3.2.4)	Peptidoglycan Biosynthesis; <br>Peptidoglycan biosynthesis--gjo; <br>cell division cluster containing FtsQ		locus|R51_01209		C (cytoplasmic)	C:cytoplasm	Cytoplasmic	Cytoplasmic			0.344843	0
1183	CDS	R51_1	1256052	1256198	64.0714	3	+	147	D-alanine--D-alanine ligase (EC 6.3.2.4)	Peptidoglycan Biosynthesis; <br>Peptidoglycan biosynthesis--gjo; <br>cell division cluster containing FtsQ		locus|R51_01210		unknown	C:cytoplasm	Cytoplasmic	Cytoplasmic			0.431508	0
1184	CDS	R51_1	1256200	1257030	90.5427	1	+	831	Cell division protein FtsQ	Bacterial Cell Division; <br>Bacterial Cytoskeleton; <br>cell division cluster containing FtsQ; <br>cell division core of larger cluster		locus|R51_01211		IM (inner membrane)	C:plasma membrane	Periplasmic	Unknown			0.217607	1
1185	CDS	R51_1	1257027	1258289	96.4507	3	+	1263	Cell division protein FtsA	Bacterial Cell Division; <br>Bacterial Cytoskeleton; <br>cell division cluster containing FtsQ; <br>cell division core of larger cluster		locus|R51_01212		C (cytoplasmic)	C:cytoplasm	Cytoplasmic	Cytoplasmic			0.282063	0
1186	CDS	R51_1	1258350	1259501	91.1152	3	+	1152	Cell division protein FtsZ (EC 3.4.24.-)	Bacterial Cell Division; <br>Bacterial Cytoskeleton; <br>cell division cluster containing FtsQ; <br>cell division core of larger cluster		locus|R51_01213		C (cytoplasmic)	C:cytoplasm	Cytoplasmic	Cytoplasmic		Probable ANTIGEN	0.294861	0
1187	CDS	R51_1	1259602	1260519	90.9091	1	+	918	UDP-3-O-[3-hydroxymyristoyl] N-acetylglucosamine deacetylase (EC 3.5.1.108)	CBSS-349966.3.peg.197; <br>KDO2-Lipid A biosynthesis		locus|R51_01214		C (cytoplasmic)	C:cytoplasm	Cytoplasmic	Cytoplasmic			0.357335	0
1188	CDS	R51_1	1260798	1261295	63.0181	3	+	498	Secretion monitor precursor	CBSS-349966.3.peg.197		locus|R51_01215		P (Periplasm)	C:cytoplasm	Periplasmic	Unknown	SP		0.842352	1
1189	CDS	R51_1	1261357	1264062	96.0614	1	+	2706	Protein export cytoplasm protein SecA ATPase RNA helicase (TC 3.A.5.1.1)	- none -		locus|R51_01216		C (cytoplasmic)	C:cytoplasm	Cytoplasmic	Cytoplasmic			0.482858	0
1190	CDS	R51_1	1264214	1264609	56.1484	2	+	396	Mutator mutT protein (7,8-dihydro-8-oxoguanine-triphosphatase) (EC 3.6.1.-)	CBSS-562.2.peg.633; <br>Nudix proteins (nucleoside triphosphate hydrolases)		locus|R51_01217		C (cytoplasmic)	C:cytoplasm	Cytoplasmic	Unknown			0.646872	0
1191	CDS	R51_1	1265632	1264643	90.9091	-1	-	990	Aldo-keto reductase	- none -		locus|R51_01218		P (Periplasm)	C:cytoplasm	Cytoplasmic	Cytoplasmic	SP		0.303054	0
1192	CDS	R51_1	1265736	1266659	89.787	3	+	924	putative LysR-family transcriptional regulator	- none -		locus|R51_01219		C (cytoplasmic)	C:cytoplasm	Cytoplasmic	Cytoplasmic			0.410537	0
1193	CDS	R51_1	1266847	1266656	35.7912	-1	-	192	FIG003276: zinc-binding protein	CBSS-562.2.peg.633		locus|R51_01220		C (cytoplasmic)	C:cytoplasm	Cytoplasmic	Unknown			0.286813	0
1194	CDS	R51_1	1267600	1266857	75.1088	-1	-	744	FIG002842: hypothetical protein	CBSS-562.2.peg.633		locus|R51_01221		unknown	C:cytoplasm	Cytoplasmic	Cytoplasmic			0.361039	0
1195	CDS	R51_1	1268220	1267600	84.1081	-3	-	621	Dephospho-CoA kinase (EC 2.7.1.24)	CBSS-562.2.peg.633; <br>Coenzyme A Biosynthesis		locus|R51_01222		C (cytoplasmic)	C:cytoplasm	Cytoplasmic	Cytoplasmic			0.535922	0
1196	CDS	R51_1	1268446	1269489	90.9091	1	+	1044	GMP reductase (EC 1.7.1.7)	Purine conversions		locus|R51_01223		unknown	C:cytoplasm	Cytoplasmic	Cytoplasmic			0.309301	0
1197	CDS	R51_1	1270722	1269520	90.9091	-3	-	1203	Type IV fimbrial assembly protein PilC	CBSS-562.2.peg.633; <br>Type IV pilus		locus|R51_01224		IM (inner membrane)	C:plasma membrane	InnerMembrane	CytoplasmicMembrane			0.40717	3
1198	CDS	R51_1	1272097	1270712	90.9091	-1	-	1386	Type IV fimbrial assembly, ATPase PilB	CBSS-562.2.peg.633; <br>Type IV pilus		locus|R51_01225		unknown	C:cytoplasm	Cytoplasmic	Cytoplasmic			0.338595	0
1199	CDS	R51_1	1272544	1272107	81.0625	-1	-	438	Type IV pilin PilA	Type IV pilus		locus|R51_01226		P (Periplasm)	C:plasma membrane	InnerMembrane	Unknown			0.29899	1
1200	CDS	R51_1	1273659	1272766	90.0618	-3	-	894	Quinolinate phosphoribosyltransferase [decarboxylating] (EC 2.4.2.19)	Mycobacterium virulence operon possibly involved in quinolinate biosynthesis; <br>NAD and NADP cofactor biosynthesis global		locus|R51_01227		C (cytoplasmic)	C:cytoplasm	Cytoplasmic	Cytoplasmic			0.535096	0
1201	CDS	R51_1	1273747	1274310	87.0392	1	+	564	N-acetylmuramoyl-L-alanine amidase (EC 3.5.1.28) AmpD	Recycling of Peptidoglycan Amino Acids		locus|R51_01228		C (cytoplasmic)	C:cytoplasm	Cytoplasmic	Cytoplasmic			0.549351	0
1202	CDS	R51_1	1274307	1275161	68.9031	3	+	855	AmpE protein	- none -		locus|R51_01229		IM (inner membrane)	C:plasma membrane	InnerMembrane	CytoplasmicMembrane			0.428225	4
1203	CDS	R51_1	1276203	1275253	90.9091	-3	-	951	Alpha-L-arabinofuranosidase II precursor (EC 3.2.1.55)	L-Arabinose utilization		locus|R51_01230		C (cytoplasmic)	C:cytoplasm	Periplasmic	Unknown		Probable ANTIGEN	0.646644	0
1204	CDS	R51_1	1277609	1276203	90.9091	-2	-	1407	Possible GPH family transporter (TC 2.A.2) for arabinosides	L-Arabinose utilization		locus|R51_01231		IM (inner membrane)	C:plasma membrane	InnerMembrane	CytoplasmicMembrane			0.394119	12
1205	CDS	R51_1	1279143	1277773	90.9091	-3	-	1371	Aromatic amino acid transport protein AroP	Aromatic amino acid degradation		locus|R51_01232		IM (inner membrane)	C:plasma membrane	InnerMembrane	CytoplasmicMembrane			0.303298	12
1206	CDS	R51_1	1279709	1280473	90.7946	2	+	765	Transcriptional repressor for pyruvate dehydrogenase complex	- none -		locus|R51_01233		C (cytoplasmic)	C:cytoplasm	Cytoplasmic	Cytoplasmic			0.311545	0
1207	CDS	R51_1	1280633	1283296	96.0385	2	+	2664	Pyruvate dehydrogenase E1 component (EC 1.2.4.1)	5-FCL-like protein; <br>Dehydrogenase complexes; <br>Methionine Degradation; <br>Pyruvate metabolism II: acetyl-CoA, acetogenesis from pyruvate		locus|R51_01234		C (cytoplasmic)	C:cytoplasm	Cytoplasmic	Cytoplasmic			0.426159	0
1208	CDS	R51_1	1283311	1285194	95.1912	1	+	1884	Dihydrolipoamide acetyltransferase component of pyruvate dehydrogenase complex (EC 2.3.1.12)	5-FCL-like protein; <br>Dehydrogenase complexes; <br>Pyruvate metabolism II: acetyl-CoA, acetogenesis from pyruvate		locus|R51_01235		C (cytoplasmic)	C:cytoplasm	Cytoplasmic	Cytoplasmic		Probable ANTIGEN	0.81339	0
1209	CDS	R51_1	1285396	1286820	93.1074	1	+	1425	Dihydrolipoamide dehydrogenase of pyruvate dehydrogenase complex (EC 1.8.1.4) @ Dihydrolipoamide dehydrogenase (EC 1.8.1.4)	5-FCL-like protein; <br>Glycine cleavage system; <br>Pyruvate metabolism II: acetyl-CoA, acetogenesis from pyruvate; <br>TCA Cycle; <br>TCA Cycle		locus|R51_01236		C (cytoplasmic)	C:cytoplasm	Cytoplasmic	Cytoplasmic			0.689079	0
200	CDS	R51_1	211667	212104	90.9091	2	+	438	putative fimbrial protein precursor	- none -		locus|R51_00201		EC (Extracellular)	C:extracellular space	Periplasmic	Unknown	SP	Probable ANTIGEN	0.386558	0	0.6336
1211	CDS	R51_1	1288222	1287431	90.8175	-1	-	792	FIG01045811: hypothetical protein	- none -		locus|R51_01238		P (Periplasm)	C:extracellular space	Periplasmic	Unknown	SP		0.865536	0
1212	CDS	R51_1	1289632	1288235	93.3822	-1	-	1398	FIG01200701: possible membrane protein	- none -		locus|R51_01239		EC (Extracellular)	C:cytoplasm	Extracellular	Extracellular		Probable ANTIGEN	0.916754	0
1213	CDS	R51_1	1290247	1292844	97.5498	1	+	2598	Aconitate hydratase 2 (EC 4.2.1.3) @ 2-methylisocitrate dehydratase (EC 4.2.1.99)	Glyoxylate bypass; <br>Methylcitrate cycle; <br>Propionate-CoA to Succinate Module; <br>Propionate-CoA to Succinate Module; <br>TCA Cycle		locus|R51_01240		C (cytoplasmic)	C:cytoplasm	Cytoplasmic	Cytoplasmic			0.345353	0
1214	CDS	R51_1	1293348	1292884	57.133	-3	-	465	FIG01045138: hypothetical protein	- none -		locus|R51_01241		IM (inner membrane)	C:plasma membrane	InnerMembrane	CytoplasmicMembrane			0.454775	4
1215	CDS	R51_1	1294088	1293765	39.7985	-2	-	324	cellular communication/signal transduction	- none -		locus|R51_01242		C (cytoplasmic)	C:outer membrane	Cytoplasmic	Unknown		Probable ANTIGEN	0.339708	0
1216	CDS	R51_1	1294359	1294721	37.5315	3	+	363	FIG01045153: hypothetical protein	- none -		locus|R51_01243		C (cytoplasmic)	C:cytoplasm	Cytoplasmic	Unknown			0.312653	0
1217	CDS	R51_1	1294956	1295909	89.6267	3	+	954	2-keto-3-deoxygluconate permease (KDG permease)	D-Galacturonate and D-Glucuronate Utilization		locus|R51_01244		IM (inner membrane)	C:plasma membrane	InnerMembrane	CytoplasmicMembrane		Probable ANTIGEN	0.47034	10
1218	CDS	R51_1	1295906	1297177	90.9091	2	+	1272	Candidate type III effector Hop protein	- none -		locus|R51_01245		C (cytoplasmic)	C:cytoplasm	Cytoplasmic	Unknown			0.540535	0
1219	CDS	R51_1	1297167	1298150	90.9091	3	+	984	4-hydroxythreonine-4-phosphate dehydrogenase (EC 1.1.1.262)	EC49-61; <br>ECSIG4-SIG7; <br>Possible RNA modification and stress response cluster; <br>Pyridoxin (Vitamin B6) Biosynthesis		locus|R51_01246		C (cytoplasmic)	C:cytoplasm	Cytoplasmic	Cytoplasmic			0.240332	0
1220	CDS	R51_1	1298160	1298927	90.6572	3	+	768	DeoR family transcriptional regulator probably related to glycerate, glycolaldehyde metabolism	- none -		locus|R51_01247		C (cytoplasmic)	C:cytoplasm	Cytoplasmic	Cytoplasmic			0.377377	0
1221	CDS	R51_1	1299751	1298957	90.9091	-1	-	795	S-adenosylmethionine decarboxylase proenzyme (EC 4.1.1.50), prokaryotic class 1A	Polyamine Metabolism		locus|R51_01248		C (cytoplasmic)	C:cytoplasm	Cytoplasmic	Cytoplasmic			0.255631	0
1222	CDS	R51_1	1300632	1299772	81.7266	-3	-	861	Spermidine synthase (EC 2.5.1.16)	Polyamine Metabolism		locus|R51_01249		C (cytoplasmic)	C:cytoplasm	Cytoplasmic	Cytoplasmic			0.454674	0
1223	CDS	R51_1	1301125	1300739	86.1232	-1	-	387	Predicted chaperone lipoprotein YacC, potentially involved in protein secretion	Polyamine Metabolism		locus|R51_01250		C (cytoplasmic)	C:cytoplasm	Periplasmic	Unknown	SP		0.388388	0
1224	CDS	R51_1	1301288	1302898	92.8326	2	+	1611	Blue copper oxidase CueO precursor	Copper homeostasis		locus|R51_01251		unknown	C:extracellular space	Periplasmic	Periplasmic	SP		0.311331	0
1225	CDS	R51_1	1305366	1302976	95.924	-3	-	2391	Glucose dehydrogenase, PQQ-dependent (EC 1.1.5.2)	D-gluconate and ketogluconates metabolism; <br>Entner-Doudoroff Pathway; <br>Respiratory dehydrogenases 1		locus|R51_01252		IM (inner membrane)	C:plasma membrane	InnerMembrane	CytoplasmicMembrane			0.341786	5
1226	CDS	R51_1	1305572	1306108	90.9091	2	+	537	Hypoxanthine-guanine phosphoribosyltransferase (EC 2.4.2.8)	Cell division-ribosomal stress proteins cluster; <br>Folate biosynthesis cluster; <br>Purine conversions		locus|R51_01253		C (cytoplasmic)	C:cytoplasm	Cytoplasmic	Cytoplasmic			0.744364	0
1227	CDS	R51_1	1306828	1306166	90.5427	-1	-	663	Carbonic anhydrase (EC 4.2.1.1)	Zinc regulated enzymes		locus|R51_01254		C (cytoplasmic)	C:cytoplasm	Cytoplasmic	Cytoplasmic			0.356487	0
1228	CDS	R51_1	1306937	1307863	90.9091	2	+	927	ABC-type multidrug transport system, ATPase component	- none -		locus|R51_01255		unknown	C:cytoplasm	Cytoplasmic	CytoplasmicMembrane			0.39337	0
1229	CDS	R51_1	1307860	1308630	40.9663	1	+	771	ABC-type multidrug transport system, permease component	- none -		locus|R51_01256		IM (inner membrane)	C:plasma membrane	InnerMembrane	CytoplasmicMembrane			0.436541	6
213	CDS	R51_1	227827	227108	90.9091	-1	-	720	FIG002337: predicted inner membrane protein	- none -		locus|R51_00215		P (Periplasm)	C:cytoplasm	Periplasmic	CytoplasmicMembrane	SP	Probable ANTIGEN	0.298529	0
1231	CDS	R51_1	1310767	1309838	90.932	-1	-	930	FIG100795: Fimbriae usher protein StiC	- none -		locus|R51_01258		EC (Extracellular)	C:cytoplasm	OuterMembrane	OuterMembrane		Probable ANTIGEN	0.468669	0
222	CDS	R51_1	237228	240524	93.6112	3	+	3297	Cellulose synthase operon protein C	- none -		locus|R51_00224		P (Periplasm)	C:cytoplasm	OuterMembrane	Unknown	SP	Probable ANTIGEN	0.427477	0
242	CDS	R51_1	263382	264425	91.1152	3	+	1044	L-asparaginase (EC 3.5.1.1)	Glutamine, Glutamate, Aspartate and Asparagine Biosynthesis		locus|R51_00244		OM (Outer Membrane)	C:extracellular space	Cytoplasmic	Unknown	SP	Probable ANTIGEN	0.477367	1
1234	CDS	R51_1	1313681	1313142	92.8326	-2	-	540	Cell wall surface anchor family protein	- none -		locus|R51_01261		EC (Extracellular)	C:extracellular space	Extracellular	Extracellular	SP		0.894913	0
1235	CDS	R51_1	1314051	1314491	79.0245	3	+	441	Putative PTS system IIA component yadI (EC 2.7.1.69)	- none -		locus|R51_01262		C (cytoplasmic)	C:cytoplasm	Cytoplasmic	Unknown			0.732495	0
1236	CDS	R51_1	1314553	1315782	90.9091	1	+	1230	Polysaccharide deacetylase	- none -		locus|R51_01263		IM (inner membrane)	C:plasma membrane	Periplasmic	CytoplasmicMembrane	SP		0.791685	1
1237	CDS	R51_1	1316169	1315789	65.5828	-3	-	381	Aspartate 1-decarboxylase (EC 4.1.1.11)	Coenzyme A Biosynthesis; <br>Coenzyme A Biosynthesis cluster; <br>Folate biosynthesis cluster		locus|R51_01264		unknown	C:cytoplasm	Cytoplasmic	Unknown			0.874592	0
1238	CDS	R51_1	1317118	1316264	90.8862	-1	-	855	Pantoate--beta-alanine ligase (EC 6.3.2.1)	Coenzyme A Biosynthesis; <br>Coenzyme A Biosynthesis cluster; <br>Folate biosynthesis cluster		locus|R51_01265		C (cytoplasmic)	C:cytoplasm	Cytoplasmic	Cytoplasmic			0.296175	0
1239	CDS	R51_1	1318035	1317244	90.1992	-3	-	792	3-methyl-2-oxobutanoate hydroxymethyltransferase (EC 2.1.2.11)	Coenzyme A Biosynthesis; <br>Coenzyme A Biosynthesis cluster		locus|R51_01266		C (cytoplasmic)	C:cytoplasm	Cytoplasmic	Cytoplasmic			0.419897	0
1240	CDS	R51_1	1318635	1318156	78.5894	-3	-	480	2-amino-4-hydroxy-6-hydroxymethyldihydropteridine pyrophosphokinase (EC 2.7.6.3)	Folate Biosynthesis; <br>Folate biosynthesis cluster		locus|R51_01267		C (cytoplasmic)	C:cytoplasm	Cytoplasmic	Cytoplasmic			0.604338	0
1241	CDS	R51_1	1320050	1318632	93.8402	-2	-	1419	Poly(A) polymerase (EC 2.7.7.19)	Polyadenylation bacterial		locus|R51_01268		C (cytoplasmic)	C:cytoplasm	Cytoplasmic	Cytoplasmic			0.443467	0
1242	CDS	R51_1	1321132	1320191	78.1543	-1	-	942	glutamyl-Q-tRNA synthetase	Queuosine-Archaeosine Biosynthesis; <br>tRNA modification Bacteria; <br>tRNAmodification position 34		locus|R51_01269		C (cytoplasmic)	C:cytoplasm	Cytoplasmic	Cytoplasmic			0.588052	0
1243	CDS	R51_1	1321611	1321156	89.7183	-3	-	456	C4-type zinc finger protein, DksA/TraR family	Zinc regulated enzymes		locus|R51_01270		C (cytoplasmic)	C:cytoplasm	Cytoplasmic	Cytoplasmic			0.432927	0
1244	CDS	R51_1	1322492	1321788	90.9091	-2	-	705	Sugar/maltose fermentation stimulation protein homolog	Fermentations: Mixed acid		locus|R51_01271		OM (Outer Membrane)	C:cytoplasm	Cytoplasmic	Cytoplasmic			0.237225	0
1245	CDS	R51_1	1323039	1322509	20.5633	-3	-	531	2&#39;-5&#39; RNA ligase	RNA processing orphans		locus|R51_01272		unknown	C:cytoplasm	Periplasmic	CytoplasmicMembrane			0.593312	0
1246	CDS	R51_1	1323067	1325541	90.932	1	+	2475	ATP-dependent helicase HrpB	- none -		locus|R51_01273		C (cytoplasmic)	C:cytoplasm	InnerMembrane	CytoplasmicMembrane			0.363898	0
1247	CDS	R51_1	1325682	1328204	93.1074	3	+	2523	Multimodular transpeptidase-transglycosylase (EC 2.4.1.129) (EC 3.4.-.-)	Peptidoglycan Biosynthesis; <br>Type IV pilus		locus|R51_01274		IM (inner membrane)	C:plasma membrane	InnerMembrane	CytoplasmicMembrane			0.266708	1
289	CDS	R51_1	312119	311703	90.6572	-2	-	417	FIG00638953: hypothetical protein	- none -		locus|R51_00291		OM (Outer Membrane)	C:extracellular space	Extracellular	Unknown	SP	Probable ANTIGEN	0.395797	sted
1249	CDS	R51_1	1330732	1331529	68.8802	1	+	798	Ferric hydroxamate ABC transporter (TC 3.A.1.14.3), ATP-binding protein FhuC	Siderophore Aerobactin		locus|R51_01276		C (cytoplasmic)	C:cytoplasm	Cytoplasmic	CytoplasmicMembrane			0.269142	0
1250	CDS	R51_1	1331529	1332419	90.6572	3	+	891	Ferric hydroxamate ABC transporter (TC 3.A.1.14.3), periplasmic substrate binding protein FhuD	Siderophore Aerobactin		locus|R51_01277		P (Periplasm)	C:plasma membrane	InnerMembrane	Periplasmic	SP		0.272054	0
1251	CDS	R51_1	1332416	1334473	90.9091	2	+	2058	Ferric hydroxamate ABC transporter (TC 3.A.1.14.3), permease component FhuB	Siderophore Aerobactin		locus|R51_01278		IM (inner membrane)	C:plasma membrane	InnerMembrane	CytoplasmicMembrane			0.287719	17
290	CDS	R51_1	312245	313987	99.1756	2	+	1743	Gamma-glutamyltranspeptidase (EC 2.3.2.2)	Glutathione: Biosynthesis and gamma-glutamyl cycle		locus|R51_00292		OM (Outer Membrane)	C:extracellular space	Periplasmic	Periplasmic	SP	Probable ANTIGEN	0.494198	0
353	CDS	R51_1	389608	390009	43.2791	1	+	402	Type IV pilus biogenesis protein PilP	Type IV pilus		locus|R51_00355		OM (Outer Membrane)	C:extracellular space	Periplasmic	Unknown	SP	Probable ANTIGEN	0.286736	0
1254	CDS	R51_1	1337513	1338715	90.9091	2	+	1203	Fimbriae usher protein StfC	The fimbrial Stf cluster		locus|R51_01281		EC (Extracellular)	C:cytoplasm	OuterMembrane	OuterMembrane		Probable ANTIGEN	0.426504	0
363	CDS	R51_1	404408	398637	96.8399	-2	-	5772	putative surface-exposed virulence protein	- none -		locus|R51_00365		OM (Outer Membrane)	C:cytoplasm	Extracellular	Unknown	SP	Probable ANTIGEN	0.444909	0
472	CDS	R51_1	498248	497793	90.9091	-2	-	456	Zinc resistance-associated protein	Zinc resistance		locus|R51_00482		EC (Extracellular)	C:extracellular space	Periplasmic	Periplasmic	SP	Probable ANTIGEN	0.373312	1
1257	CDS	R51_1	1340250	1340489	90.1763	3	+	240	Minor fimbrial subunit StfF	The fimbrial Stf cluster		locus|R51_01284		unknown	C:cytoplasm	Extracellular	Unknown		Probable ANTIGEN	0.294043	0
500	CDS	R51_1	534239	533547	91.0007	-2	-	693	Outer membrane sugar transport protein YshA	- none -		locus|R51_00514		OM (Outer Membrane)	C:extracellular space	OuterMembrane	OuterMembrane	SP	Probable ANTIGEN	0.271404	0
523	CDS	R51_1	555926	555339	90.9091	-2	-	588	Formate dehydrogenase O alpha subunit (EC 1.2.1.2) @ selenocysteine-containing	Formate dehydrogenase; <br>Formate hydrogenase; <br>Selenocysteine metabolism		locus|R51_00537		P (Periplasm)	C:extracellular space	Periplasmic	Periplasmic	SP	Probable ANTIGEN	0.414838	1
1260	CDS	R51_1	1343250	1341970	90.9091	-3	-	1281	Glutamate-1-semialdehyde aminotransferase (EC 5.4.3.8)	CBSS-196164.1.peg.461; <br>Heme and Siroheme Biosynthesis		locus|R51_01287		C (cytoplasmic)	C:cytoplasm	Cytoplasmic	Cytoplasmic			0.742969	0
1261	CDS	R51_1	1343420	1344841	90.9091	2	+	1422	H(+)/Cl(-) exchange transporter ClcA	- none -		locus|R51_01288		IM (inner membrane)	C:plasma membrane	InnerMembrane	CytoplasmicMembrane			0.673083	11
1262	CDS	R51_1	1344923	1345267	87.6803	2	+	345	ErpA, essential respiratory protein A / probable iron binding protein from the HesB_IscA_SufA family	- none -		locus|R51_01289		C (cytoplasmic)	C:cytoplasm	Periplasmic	Cytoplasmic		Probable ANTIGEN	0.395447	0
1263	CDS	R51_1	1345991	1345368	65.9492	-2	-	624	Putative inner membrane protein	- none -		locus|R51_01290		IM (inner membrane)	C:plasma membrane	InnerMembrane	CytoplasmicMembrane			0.264644	6
1264	CDS	R51_1	1346828	1346028	90.9091	-2	-	801	Vitamin B12 ABC transporter, B12-binding component BtuF	Coenzyme B12 biosynthesis		locus|R51_01291		P (Periplasm)	C:plasma membrane	Periplasmic	Periplasmic	SP		0.308728	1
1265	CDS	R51_1	1347519	1346821	88.4589	-3	-	699	5&#39;-methylthioadenosine nucleosidase (EC 3.2.2.16) / S-adenosylhomocysteine nucleosidase (EC 3.2.2.9)	Adenosyl nucleosidases; <br>Adenosyl nucleosidases; <br>Methionine Biosynthesis; <br>Methionine Degradation; <br>Polyamine Metabolism		locus|R51_01292		C (cytoplasmic)	C:plasma membrane	Cytoplasmic	Cytoplasmic			0.271939	0
1266	CDS	R51_1	1347604	1349121	90.932	1	+	1518	Deoxyguanosinetriphosphate triphosphohydrolase (EC 3.1.5.1), subgroup 1	Purine conversions; <br>dNTP triphosphohydrolase protein family		locus|R51_01293		C (cytoplasmic)	C:cytoplasm	Cytoplasmic	Cytoplasmic			0.350573	0
527	CDS	R51_1	558428	559528	95.695	2	+	1101	FIG00638858: hypothetical protein	- none -		locus|R51_00541		P (Periplasm)	C:extracellular space	Periplasmic	Periplasmic	SP	Probable ANTIGEN	0.460974	0
1268	CDS	R51_1	1350764	1351984	90.9091	2	+	1221	Sugar diacid utilization regulator SdaR	D-galactarate, D-glucarate and D-glycerate catabolism; <br>D-galactarate, D-glucarate and D-glycerate catabolism - gjo		locus|R51_01295		C (cytoplasmic)	C:cytoplasm	Cytoplasmic	Cytoplasmic			0.235876	0
1269	CDS	R51_1	1352459	1352073	71.8342	-2	-	387	UPF0325 protein YaeH	- none -		locus|R51_01296		C (cytoplasmic)	C:cytoplasm	Cytoplasmic	Cytoplasmic			0.673463	0
1270	CDS	R51_1	1352770	1354008	87.5658	1	+	1239	Permeases of the major facilitator superfamily	- none -		locus|R51_01297		IM (inner membrane)	C:plasma membrane	InnerMembrane	CytoplasmicMembrane			0.322486	11
1271	CDS	R51_1	1354869	1354045	90.4969	-3	-	825	2,3,4,5-tetrahydropyridine-2,6-dicarboxylate N-succinyltransferase (EC 2.3.1.117)	Lysine Biosynthesis DAP Pathway; <br>Lysine Biosynthesis DAP Pathway, GJO scratch		locus|R51_01298		C (cytoplasmic)	C:cytoplasm	Cytoplasmic	Cytoplasmic			0.395062	0
1272	CDS	R51_1	1357571	1354899	90.9091	-2	-	2673	[Protein-PII] uridylyltransferase (EC 2.7.7.59)	Ammonia assimilation; <br>CBSS-312309.3.peg.1965		locus|R51_01299		C (cytoplasmic)	C:cytoplasm	Cytoplasmic	Unknown			0.296415	0
1273	CDS	R51_1	1358603	1357809	88.2757	-2	-	795	Methionine aminopeptidase (EC 3.4.11.18)	CBSS-312309.3.peg.1965; <br>Translation termination factors bacterial		locus|R51_01300		C (cytoplasmic)	C:cytoplasm	Cytoplasmic	Cytoplasmic			0.377119	0
1274	CDS	R51_1	1359054	1359779	90.8862	3	+	726	SSU ribosomal protein S2p (SAe)	CBSS-312309.3.peg.1965; <br>Ribosome SSU bacterial; <br>Ribosome recycling related cluster		locus|R51_01301		C (cytoplasmic)	C:cytoplasm	Cytoplasmic	Cytoplasmic			0.266657	0
1275	CDS	R51_1	1360037	1360888	90.9091	2	+	852	Translation elongation factor Ts	CBSS-312309.3.peg.1965; <br>Ribosome recycling related cluster; <br>Translation elongation factors bacterial		locus|R51_01302		C (cytoplasmic)	C:cytoplasm	Cytoplasmic	Cytoplasmic			0.436318	0
1276	CDS	R51_1	1361033	1361758	90.9091	2	+	726	Uridine monophosphate kinase (EC 2.7.4.22)	CBSS-312309.3.peg.1965; <br>Ribosome recycling related cluster		locus|R51_01303		C (cytoplasmic)	C:cytoplasm	Cytoplasmic	Cytoplasmic			0.36419	0
1277	CDS	R51_1	1361905	1362462	90.9091	1	+	558	Ribosome recycling factor	Ribosome recycling related cluster; <br>Translation termination factors bacterial		locus|R51_01304		C (cytoplasmic)	C:cytoplasm	Cytoplasmic	Cytoplasmic			0.713537	0
1278	CDS	R51_1	1362604	1363800	90.9091	1	+	1197	1-deoxy-D-xylulose 5-phosphate reductoisomerase (EC 1.1.1.267)	CBSS-83331.1.peg.3039; <br>Isoprenoid Biosynthesis; <br>Nonmevalonate Branch of Isoprenoid Biosynthesis		locus|R51_01305		C (cytoplasmic)	C:cytoplasm	Cytoplasmic	CytoplasmicMembrane	SP		0.257143	0
1279	CDS	R51_1	1364113	1364871	88.4589	1	+	759	Undecaprenyl diphosphate synthase (EC 2.5.1.31)	CBSS-83331.1.peg.3039; <br>Isoprenoid Biosynthesis; <br>Isoprenoinds for Quinones; <br>Polyprenyl Diphosphate Biosynthesis		locus|R51_01306		C (cytoplasmic)	C:cytoplasm	Cytoplasmic	Cytoplasmic			0.32616	0
1280	CDS	R51_1	1364884	1365741	78.1543	1	+	858	Phosphatidate cytidylyltransferase (EC 2.7.7.41)	Glycerolipid and Glycerophospholipid Metabolism in Bacteria		locus|R51_01307		IM (inner membrane)	C:plasma membrane	InnerMembrane	CytoplasmicMembrane			0.712506	8
1281	CDS	R51_1	1365753	1367105	90.9091	3	+	1353	Intramembrane protease RasP/YluC, implicated in cell division based on FtsL cleavage	CBSS-83331.1.peg.3039; <br>Periplasmic Stress Response		locus|R51_01308		IM (inner membrane)	C:plasma membrane	InnerMembrane	CytoplasmicMembrane			0.52703	4
539	CDS	R51_1	570672	571343	92.8097	3	+	672	Oligogalacturonide-Rhamnogalacturonide-specific porin	- none -		locus|R51_00553		OM (Outer Membrane)	C:cytoplasm	OuterMembrane	OuterMembrane	SP	Probable ANTIGEN	0.443132	0
1283	CDS	R51_1	1369692	1370177	94.6874	3	+	486	Outer membrane protein H precursor	Lipopolysaccharide assembly; <br>Llipid A biosynthesis cluster; <br>Periplasmic Stress Response		locus|R51_01310		OM (Outer Membrane)	C:extracellular space	Periplasmic	Periplasmic	SP		0.413693	0
1284	CDS	R51_1	1370181	1371206	90.9091	3	+	1026	UDP-3-O-[3-hydroxymyristoyl] glucosamine N-acyltransferase (EC 2.3.1.-)	KDO2-Lipid A biosynthesis; <br>Llipid A biosynthesis cluster		locus|R51_01311		C (cytoplasmic)	C:cytoplasm	Cytoplasmic	Cytoplasmic		Probable ANTIGEN	0.346551	0
1285	CDS	R51_1	1371312	1371767	70.0023	3	+	456	3-hydroxyacyl-[acyl-carrier-protein] dehydratase, FabZ form (EC 4.2.1.59)	Fatty Acid Biosynthesis FASII; <br>Llipid A biosynthesis cluster		locus|R51_01312		C (cytoplasmic)	C:plasma membrane	Cytoplasmic	Cytoplasmic			0.379605	0
1286	CDS	R51_1	1371771	1372559	90.9091	3	+	789	Acyl-[acyl-carrier-protein]--UDP-N-acetylglucosamine O-acyltransferase (EC 2.3.1.129)	KDO2-Lipid A biosynthesis; <br>Llipid A biosynthesis cluster		locus|R51_01313		C (cytoplasmic)	C:cytoplasm	Cytoplasmic	Cytoplasmic			0.406702	0
1287	CDS	R51_1	1372559	1373707	90.7946	2	+	1149	Lipid-A-disaccharide synthase (EC 2.4.1.182)	KDO2-Lipid A biosynthesis; <br>Llipid A biosynthesis cluster		locus|R51_01314		unknown	C:cytoplasm	Cytoplasmic	Cytoplasmic			0.470158	0
1288	CDS	R51_1	1373704	1374300	77.9482	1	+	597	Ribonuclease HII (EC 3.1.26.4)	Conserved gene cluster associated with Met-tRNA formyltransferase; <br>Ribonuclease H		locus|R51_01315		C (cytoplasmic)	C:cytoplasm	Cytoplasmic	Cytoplasmic			0.290528	0
1289	CDS	R51_1	1374324	1377806	97.2979	3	+	3483	DNA polymerase III alpha subunit (EC 2.7.7.7)	Phage replication		locus|R51_01316		P (Periplasm)	C:cytoplasm	Cytoplasmic	Cytoplasmic			0.340935	0
1290	CDS	R51_1	1377819	1378778	90.9091	3	+	960	Acetyl-coenzyme A carboxyl transferase alpha chain (EC 6.4.1.2)	Fatty Acid Biosynthesis FASII		locus|R51_01317		C (cytoplasmic)	C:cytoplasm	Cytoplasmic	Cytoplasmic			0.282553	0
662	CDS	R51_1	690229	692073	97.0231	1	+	1845	Outer membrane vitamin B12 receptor BtuB	Coenzyme B12 biosynthesis		locus|R51_00676		OM (Outer Membrane)	C:extracellular space	OuterMembrane	OuterMembrane	SP	Probable ANTIGEN	0.352798	0
1292	CDS	R51_1	1380798	1382939	92.3059	3	+	2142	Lysine decarboxylase 2, constitutive (EC 4.1.1.18)	Lysine degradation		locus|R51_01319		C (cytoplasmic)	C:cytoplasm	Cytoplasmic	Cytoplasmic			0.319372	0
1293	CDS	R51_1	1382995	1383384	54.1791	1	+	390	FIG01280259: hypothetical protein	- none -		locus|R51_01320		C (cytoplasmic)	C:cytoplasm	Cytoplasmic	Cytoplasmic			0.622942	0
1294	CDS	R51_1	1383447	1384739	90.7946	3	+	1293	tRNA(Ile)-lysidine synthetase (EC 6.3.4.19)	Cell division-ribosomal stress proteins cluster; <br>Folate biosynthesis cluster; <br>tRNA modification Bacteria; <br>tRNA processing; <br>tRNAmodification position 34		locus|R51_01321		C (cytoplasmic)	C:cytoplasm	Cytoplasmic	CytoplasmicMembrane			0.328138	0
1295	CDS	R51_1	1385083	1384823	80.5587	-1	-	261	Rho-specific inhibitor of transcription termination (YaeO)	Transcription factors bacterial		locus|R51_01322		C (cytoplasmic)	C:cytoplasm	Cytoplasmic	Cytoplasmic			0.361155	0
1296	CDS	R51_1	1385270	1385070	46.4163	-2	-	201	FIG00639395: hypothetical protein	- none -		locus|R51_01323		C (cytoplasmic)	C:cytoplasm	Cytoplasmic	Unknown		Probable ANTIGEN	0.708583	0
1297	CDS	R51_1	1385468	1386013	87.2223	2	+	546	YaeQ protein	- none -		locus|R51_01324		C (cytoplasmic)	C:cytoplasm	Cytoplasmic	Cytoplasmic			0.328583	0
1298	CDS	R51_1	1386010	1386432	57.133	1	+	423	Hypothetical protein YaeJ with similarity to translation release factor	Translation termination factors bacterial		locus|R51_01325		C (cytoplasmic)	C:cytoplasm	Cytoplasmic	Unknown			0.326544	0
1299	CDS	R51_1	1386464	1387165	90.9091	2	+	702	Copper homeostasis protein CutF precursor / Lipoprotein NlpE involeved in surface adhesion	Copper homeostasis: copper tolerance		locus|R51_01326		P (Periplasm)	C:extracellular space	Periplasmic	OuterMembrane	SP		0.435579	0
1300	CDS	R51_1	1388957	1387239	97.4124	-2	-	1719	Prolyl-tRNA synthetase (EC 6.1.1.15), bacterial type	tRNA aminoacylation, Pro		locus|R51_01327		C (cytoplasmic)	C:cytoplasm	Cytoplasmic	Cytoplasmic			0.482175	0
1301	CDS	R51_1	1389775	1389068	59.6977	-1	-	708	COG1720: Uncharacterized conserved protein	tRNA modification Archaea; <br>tRNA modification Bacteria		locus|R51_01328		C (cytoplasmic)	C:cytoplasm	Cytoplasmic	Unknown			0.242478	0
689	CDS	R51_1	727871	729967	98.3284	2	+	2097	YjbH outer membrane lipoprotein	YjbEFGH Locus Involved in Exopolysaccharide Production		locus|R51_00708		OM (Outer Membrane)	C:extracellular space	OuterMembrane	OuterMembrane	SP	Probable ANTIGEN	0.351655	0
1303	CDS	R51_1	1391110	1390295	90.9091	-1	-	816	Methionine ABC transporter substrate-binding protein	Methionine Biosynthesis; <br>Methionine Degradation		locus|R51_01330		P (Periplasm)	C:extracellular space	Periplasmic	CytoplasmicMembrane	SP		0.300198	0
1304	CDS	R51_1	1391802	1391149	48.4772	-3	-	654	Methionine ABC transporter permease protein	Methionine Biosynthesis; <br>Methionine Degradation		locus|R51_01331		IM (inner membrane)	C:plasma membrane	InnerMembrane	CytoplasmicMembrane			0.287899	5
1305	CDS	R51_1	1392826	1391795	90.9091	-1	-	1032	Methionine ABC transporter ATP-binding protein	Methionine Biosynthesis; <br>Methionine Degradation		locus|R51_01332		C (cytoplasmic)	C:cytoplasm	Cytoplasmic	CytoplasmicMembrane			0.516284	0
1306	CDS	R51_1	1393016	1393582	90.6114	2	+	567	D-glycero-D-manno-heptose 1,7-bisphosphate phosphatase (EC 3.1.1.-)	Capsular heptose biosynthesis; <br>LOS core oligosaccharide biosynthesis		locus|R51_01333		C (cytoplasmic)	C:cytoplasm	Cytoplasmic	Cytoplasmic			0.599619	0
1307	CDS	R51_1	1399613	1400416	90.8862	2	+	804	Methylglyoxal reductase, acetol producing (EC 1.1.1.-) / 2,5-diketo-D-gluconic acid reductase B (EC 1.1.1.274)	D-gluconate and ketogluconates metabolism		locus|R51_01339		C (cytoplasmic)	C:cytoplasm	Cytoplasmic	Cytoplasmic			0.440644	0
1308	CDS	R51_1	1401351	1400437	90.9091	-3	-	915	LysR family transcriptional regulator YafC	LysR-family proteins in Escherichia coli; <br>LysR-family proteins in Salmonella enterica Typhimurium		locus|R51_01340		C (cytoplasmic)	C:cytoplasm	Cytoplasmic	Cytoplasmic			0.242926	0
1309	CDS	R51_1	1401456	1402631	87.7948	3	+	1176	Putative drug efflux protein	- none -		locus|R51_01341		IM (inner membrane)	C:plasma membrane	InnerMembrane	CytoplasmicMembrane			0.731925	12
1310	CDS	R51_1	1402783	1403562	88.0696	1	+	780	FIG00613320: hypothetical protein	- none -		locus|R51_01342		C (cytoplasmic)	C:cytoplasm	Cytoplasmic	Unknown			0.757939	0
1311	CDS	R51_1	1403640	1404410	81.635	3	+	771	SAM-dependent methyltransferase YafE (UbiE paralog)	- none -		locus|R51_01343		C (cytoplasmic)	C:cytoplasm	Cytoplasmic	Cytoplasmic			0.389087	0
1312	CDS	R51_1	1405686	1404466	91.1152	-3	-	1221	Membrane-bound lytic murein transglycosylase D precursor (EC 3.2.1.-)	CBSS-228410.1.peg.134; <br>CBSS-342610.3.peg.1536; <br>Murein Hydrolases		locus|R51_01344		EC (Extracellular)	C:cytoplasm	OuterMembrane	Unknown		Probable ANTIGEN	0.500136	0
1313	CDS	R51_1	1406660	1405905	90.0618	-2	-	756	Hydroxyacylglutathione hydrolase (EC 3.1.2.6)	CBSS-228410.1.peg.134; <br>CBSS-342610.3.peg.1536; <br>Glutathione: Non-redox reactions; <br>Methylglyoxal Metabolism		locus|R51_01345		C (cytoplasmic)	C:cytoplasm	Cytoplasmic	Cytoplasmic			0.621414	0
1314	CDS	R51_1	1406695	1407417	81.1083	1	+	723	FIG005121: SAM-dependent methyltransferase (EC 2.1.1.-)	CBSS-228410.1.peg.134; <br>CBSS-342610.3.peg.1536; <br>Glutathione: Non-redox reactions		locus|R51_01346		C (cytoplasmic)	C:cytoplasm	InnerMembrane	Unknown			0.688982	0
1315	CDS	R51_1	1407881	1407414	86.7186	-2	-	468	Ribonuclease HI (EC 3.1.26.4)	CBSS-228410.1.peg.134; <br>CBSS-342610.3.peg.1536; <br>Ribonuclease H		locus|R51_01347		P (Periplasm)	C:cytoplasm	Cytoplasmic	Unknown			0.414729	0
1316	CDS	R51_1	1407936	1408676	87.1079	3	+	741	DNA polymerase III epsilon subunit (EC 2.7.7.7)	CBSS-228410.1.peg.134; <br>CBSS-342610.3.peg.1536		locus|R51_01348		C (cytoplasmic)	C:cytoplasm	Cytoplasmic	Cytoplasmic			0.377365	0
1317	CDS	R51_1	1409871	1409026	90.7717	-3	-	846	FIG01221494: hypothetical protein	- none -		locus|R51_01350		C (cytoplasmic)	C:cytoplasm	Cytoplasmic	Cytoplasmic			0.369468	0
1318	CDS	R51_1	1410143	1409949	44.1035	-2	-	195	hypothetical protein	- none -		locus|R51_01351		C (cytoplasmic)	C:cytoplasm	Cytoplasmic	Unknown			0.264198	0
1319	CDS	R51_1	1410660	1410169	74.2157	-3	-	492	YeeU protein (antitoxin to YeeV)	Toxin-antitoxin replicon stabilization systems		locus|R51_01352		C (cytoplasmic)	C:cytoplasm	Cytoplasmic	Cytoplasmic			0.264262	0
1320	CDS	R51_1	1411151	1410657	83.902	-2	-	495	YeeV toxin protein	Toxin-antitoxin replicon stabilization systems		locus|R51_01353		C (cytoplasmic)	C:cytoplasm	Periplasmic	Unknown			0.350031	0
1321	CDS	R51_1	1411737	1411093	86.2606	-3	-	645	hypothetical protein	- none -		locus|R51_01354		C (cytoplasmic)	C:cytoplasm	Cytoplasmic	Cytoplasmic			0.299278	0
1322	CDS	R51_1	1412105	1411734	64.6668	-2	-	372	YeeU protein (antitoxin to YeeV)	Toxin-antitoxin replicon stabilization systems		locus|R51_01355		C (cytoplasmic)	C:cytoplasm	Cytoplasmic	Unknown			0.283571	0
1323	CDS	R51_1	1412445	1412077	33.8676	-3	-	369	FIG01047880: hypothetical protein	- none -		locus|R51_01356		C (cytoplasmic)	C:cytoplasm	Cytoplasmic	Unknown			0.317006	0
1324	CDS	R51_1	1412684	1412463	35.1729	-2	-	222	Uncharacterized protein YkfH	- none -		locus|R51_01357		C (cytoplasmic)	C:cytoplasm	Cytoplasmic	Unknown			0.37209	0
1325	CDS	R51_1	1412971	1412681	66.8422	-1	-	291	FIG01047155: hypothetical protein	- none -		locus|R51_01358		C (cytoplasmic)	C:cytoplasm	Cytoplasmic	Unknown			0.437997	0
1326	CDS	R51_1	1413466	1412987	73.689	-1	-	480	DNA repair protein RadC	Bacterial cell division cluster; <br>DNA repair, bacterial		locus|R51_01359		C (cytoplasmic)	C:cytoplasm	Cytoplasmic	Cytoplasmic	SP		0.382641	0
1327	CDS	R51_1	1413935	1413477	35.837	-2	-	459	Antirestriction protein klcA	- none -		locus|R51_01360		C (cytoplasmic)	C:plasma membrane	Cytoplasmic	Unknown			0.347007	0
1328	CDS	R51_1	1414400	1414017	85.94	-2	-	384	FIG01047436: hypothetical protein	- none -		locus|R51_01361		C (cytoplasmic)	C:outer membrane	Cytoplasmic	Unknown			0.288791	0
1329	CDS	R51_1	1414504	1415001	46.5308	1	+	498	hypothetical protein	- none -		locus|R51_01362		P (Periplasm)	C:cytoplasm	InnerMembrane	CytoplasmicMembrane			0.518317	0
1330	CDS	R51_1	1415624	1414806	87.749	-2	-	819	FIG01045533: hypothetical protein	- none -		locus|R51_01363		C (cytoplasmic)	C:cytoplasm	Cytoplasmic	Cytoplasmic			0.253037	0
1331	CDS	R51_1	1416005	1415730	47.4468	-2	-	276	FIG01047572: hypothetical protein	- none -		locus|R51_01364		C (cytoplasmic)	C:cytoplasm	Cytoplasmic	Unknown			0.572324	0
1332	CDS	R51_1	1416488	1416075	90.6572	-2	-	414	FIG01047694: hypothetical protein	- none -		locus|R51_01365		EC (Extracellular)	C:extracellular space	Extracellular	Unknown	SP		0.328419	2
1333	CDS	R51_1	1417301	1416762	25.3263	-2	-	540	FIG01046309: hypothetical protein	- none -		locus|R51_01366		unknown	C:plasma membrane	InnerMembrane	CytoplasmicMembrane			0.875446	4
1334	CDS	R51_1	1417816	1417364	90.7946	-1	-	453	FIG01046605: hypothetical protein	- none -		locus|R51_01367		P (Periplasm)	C:extracellular space	Periplasmic	Unknown	SP		0.695154	0
1335	CDS	R51_1	1418265	1417813	89.9473	-3	-	453	FIG01048515: hypothetical protein	- none -		locus|R51_01368		P (Periplasm)	C:extracellular space	Periplasmic	Unknown	SP		0.756584	0
1336	CDS	R51_1	1418868	1418302	90.9091	-3	-	567	FIG01047234: hypothetical protein	- none -		locus|R51_01369		OM (Outer Membrane)	C:extracellular space	Periplasmic	Unknown	SP		0.711433	0
1337	CDS	R51_1	1419578	1418865	40.8747	-2	-	714	DNA-binding transcriptional regulator	- none -		locus|R51_01370		C (cytoplasmic)	C:cytoplasm	Cytoplasmic	Cytoplasmic			0.404051	0
1338	CDS	R51_1	1419808	1419620	27.204	-1	-	189	hypothetical protein	- none -		locus|R51_01371		C (cytoplasmic)	C:cytoplasm	Cytoplasmic	Unknown		Probable ANTIGEN	0.317862	0
1339	CDS	R51_1	1420714	1419839	78.8184	-1	-	876	NgrB	- none -		locus|R51_01372		C (cytoplasmic)	C:cytoplasm	Cytoplasmic	Cytoplasmic			0.878889	0
1340	CDS	R51_1	1421852	1424470	90.932	2	+	2619	Superfamily I DNA and RNA helicases and helicase subunits-like	- none -		locus|R51_01373		C (cytoplasmic)	C:cytoplasm	Cytoplasmic	Cytoplasmic			0.656692	0
1341	CDS	R51_1	1424578	1426737	94.6416	1	+	2160	NERD domain protein	- none -		locus|R51_01374		unknown	C:cytoplasm	Cytoplasmic	Cytoplasmic			0.380594	0
1342	CDS	R51_1	1426847	1428256	90.9091	2	+	1410	FIG01048187: hypothetical protein	- none -		locus|R51_01375		IM (inner membrane)	C:cytoplasm	Cytoplasmic	Cytoplasmic			0.365775	0
1343	CDS	R51_1	1430424	1428574	90.9091	-3	-	1851	FIG01047025: hypothetical protein	- none -		locus|R51_01376		C (cytoplasmic)	C:cytoplasm	Cytoplasmic	Cytoplasmic			0.360234	0
1344	CDS	R51_1	1430527	1430751	18.7772	1	+	225	hypothetical protein	- none -		locus|R51_01377		C (cytoplasmic)	C:cytoplasm	Cytoplasmic	Unknown			0.609861	0
1345	CDS	R51_1	1430776	1431720	90.9091	1	+	945	FIG01047788: hypothetical protein	- none -		locus|R51_01378		C (cytoplasmic)	C:plasma membrane	Cytoplasmic	Cytoplasmic			0.558437	0
1346	CDS	R51_1	1431861	1432301	72.4067	3	+	441	FIG01047788: hypothetical protein	- none -		locus|R51_01379		C (cytoplasmic)	C:cytoplasm	Cytoplasmic	Cytoplasmic			0.329628	0
1347	CDS	R51_1	1433950	1433186	89.7412	-1	-	765	FIG074102: hypothetical protein	- none -		locus|R51_01380		C (cytoplasmic)	C:cytoplasm	Cytoplasmic	Cytoplasmic			0.373397	0
1348	CDS	R51_1	1434318	1434956	82.6196	3	+	639	ClpB protein	Protein chaperones; <br>Proteolysis in bacteria, ATP-dependent; <br>Type VI secretion systems; <br>USS-DB-7		locus|R51_01381		C (cytoplasmic)	C:cytoplasm	Cytoplasmic	Cytoplasmic		Probable ANTIGEN	0.319291	0
1349	CDS	R51_1	1434953	1437118	95.9698	2	+	2166	ClpB protein	Protein chaperones; <br>Proteolysis in bacteria, ATP-dependent; <br>Type VI secretion systems; <br>USS-DB-7		locus|R51_01382		C (cytoplasmic)	C:cytoplasm	Cytoplasmic	Cytoplasmic			0.427763	0
1350	CDS	R51_1	1437123	1437449	46.3476	3	+	327	hypothetical protein	- none -		locus|R51_01383		C (cytoplasmic)	C:cytoplasm	Cytoplasmic	Unknown			0.433441	0
1351	CDS	R51_1	1440350	1440712	47.1262	2	+	363	FIG01046337: hypothetical protein	- none -		locus|R51_01384		C (cytoplasmic)	C:extracellular space	Cytoplasmic	Unknown			0.282226	0
1352	CDS	R51_1	1441155	1441376	56.4919	3	+	222	putative cytoplasmic protein	- none -		locus|R51_01385		C (cytoplasmic)	C:cytoplasm	Cytoplasmic	Unknown			0.294006	0
1353	CDS	R51_1	1441399	1441557	21.7312	1	+	159	FIG01045272: hypothetical protein	- none -		locus|R51_01386		unknown	C:plasma membrane	Cytoplasmic	Unknown	SP		0.720256	1
1354	CDS	R51_1	1442232	1442513	3.29746	3	+	282	Mobile element protein	- none -		locus|R51_01387		C (cytoplasmic)	C:cytoplasm	Cytoplasmic	Unknown			0.768874	0
696	CDS	R51_1	737539	738456	94.9393	1	+	918	Maltose operon periplasmic protein MalM	Maltose and Maltodextrin Utilization		locus|R51_00715		P (Periplasm)	C:plasma membrane	Periplasmic	Periplasmic	SP	Probable ANTIGEN	0.280798	1
705	CDS	R51_1	746501	747811	97.0231	2	+	1311	FIG01200701: possible membrane protein	- none -		locus|R51_00724		OM (Outer Membrane)	C:extracellular space	OuterMembrane	OuterMembrane	SP	Probable ANTIGEN	0.2939	0
712	CDS	R51_1	754622	755335	90.9091	2	+	714	NMN phosphatase (EC 3.1.3.5); Class B acid phosphatase precursor (EC 3.1.3.2)	NAD and NADP cofactor biosynthesis global		locus|R51_00731		P (Periplasm)	C:extracellular space	Periplasmic	Periplasmic	SP	Probable ANTIGEN	0.487423	0
740	CDS	R51_1	802154	802825	90.9091	2	+	672	NrfC protein	Nitrate and nitrite ammonification		locus|R51_00759		P (Periplasm)	C:cytoplasm	Periplasmic	Unknown	SP	Probable ANTIGEN	0.457587	0	0.2701
1359	CDS	R51_1	1447881	1448702	82.5052	3	+	822	Polysaccharide deacetylase	- none -		locus|R51_01392		C (cytoplasmic)	C:cytoplasm	Cytoplasmic	Unknown			0.443751	0
1360	CDS	R51_1	1449519	1450466	89.7183	3	+	948	LysR-family transcriptional regulator SinR	LysR-family proteins in Salmonella enterica Typhimurium		locus|R51_01393		C (cytoplasmic)	C:cytoplasm	Cytoplasmic	Cytoplasmic			0.388817	0
782	CDS	R51_1	847612	846860	90.9091	-1	-	753	Nonspecific acid phosphatase precursor (EC 3.1.3.2)	- none -		locus|R51_00801		P (Periplasm)	C:extracellular space	Periplasmic	Periplasmic	SP	Probable ANTIGEN	0.436342	0
1362	CDS	R51_1	1452259	1451852	88.207	-1	-	408	Probable secreted protein	- none -		locus|R51_01395		OM (Outer Membrane)	C:extracellular space	Periplasmic	Unknown	SP		0.420283	0
1363	CDS	R51_1	1453397	1452630	37.875	-2	-	768	Aliphatic amidase AmiE (EC 3.5.1.4)	- none -		locus|R51_01396		C (cytoplasmic)	C:cytoplasm	Cytoplasmic	Cytoplasmic			0.50632	0
1364	CDS	R51_1	1455950	1453506	90.9091	-2	-	2445	Butyryl-CoA dehydrogenase (EC 1.3.99.2)	- none -		locus|R51_01397		IM (inner membrane)	C:plasma membrane	InnerMembrane	CytoplasmicMembrane			0.386083	2
1365	CDS	R51_1	1456190	1456768	90.7717	2	+	579	Phosphoheptose isomerase 1 (EC 5.3.1.-)	Capsular heptose biosynthesis; <br>LOS core oligosaccharide biosynthesis		locus|R51_01398		C (cytoplasmic)	C:cytoplasm	Cytoplasmic	Cytoplasmic			0.474568	0
1366	CDS	R51_1	1456981	1457748	89.2375	1	+	768	Predicted glutamine amidotransferase	- none -		locus|R51_01399		C (cytoplasmic)	C:cytoplasm	Periplasmic	Cytoplasmic			0.622727	0
793	CDS	R51_1	858744	859097	90.9091	3	+	354	probable membrane protein yjeI	- none -		locus|R51_00813		EC (Extracellular)	C:extracellular space	Extracellular	Unknown	SP	Probable ANTIGEN	0.451011	0
1368	CDS	R51_1	1458709	1459764	90.9091	1	+	1056	DNA polymerase IV (EC 2.7.7.7)	DNA repair, bacterial		locus|R51_01401		C (cytoplasmic)	C:cytoplasm	Cytoplasmic	Cytoplasmic			0.278533	0
1369	CDS	R51_1	1459983	1461122	90.9091	3	+	1140	Protein with similarity to RtcB	RNA 3&#39;-terminal phosphate cyclase; <br>Translation termination factors bacterial		locus|R51_01402		C (cytoplasmic)	C:cytoplasm	Cytoplasmic	Cytoplasmic			0.281699	0
1370	CDS	R51_1	1461119	1461733	79.6886	2	+	615	Peptide chain release factor homolog	Translation termination factors bacterial		locus|R51_01403		C (cytoplasmic)	C:cytoplasm	Cytoplasmic	Cytoplasmic			0.291734	0
1371	CDS	R51_1	1463345	1461888	91.0007	-2	-	1458	Aminoacyl-histidine dipeptidase (Peptidase D) (EC 3.4.13.3)	Dipeptidases (EC 3.4.13.-); <br>Recycling of Peptidoglycan Amino Acids		locus|R51_01404		C (cytoplasmic)	C:cytoplasm	Cytoplasmic	Cytoplasmic			0.362504	0
1372	CDS	R51_1	1463594	1464052	80.5587	2	+	459	Xanthine-guanine phosphoribosyltransferase (EC 2.4.2.22)	Purine conversions		locus|R51_01405		C (cytoplasmic)	C:cytoplasm	Cytoplasmic	Cytoplasmic			0.283695	0
1373	CDS	R51_1	1464141	1465385	90.9091	3	+	1245	Fermentation/respiration switch protein	- none -		locus|R51_01406		C (cytoplasmic)	C:cytoplasm	Cytoplasmic	Unknown			0.219503	0
1374	CDS	R51_1	1465443	1465844	85.8255	3	+	402	Curlin genes transcriptional activator	- none -		locus|R51_01407		C (cytoplasmic)	C:cytoplasm	Cytoplasmic	Cytoplasmic			0.282956	0
1375	CDS	R51_1	1466191	1465895	90.9091	-1	-	297	Outer membrane pore protein E precursor	- none -		locus|R51_01408		C (cytoplasmic)	C:outer membrane	Extracellular	OuterMembrane		Probable ANTIGEN	0.406126	0
797	CDS	R51_1	862221	862367	46.8514	3	+	147	Entericidin B precursor	- none -		locus|R51_00817		unknown	C:extracellular space	Cytoplasmic	CytoplasmicMembrane	SP	Probable ANTIGEN	0.318505	1
1377	CDS	R51_1	1467230	1468333	90.8862	2	+	1104	Glutamate 5-kinase (EC 2.7.2.11) / RNA-binding C-terminal domain PUA	Proline Synthesis; <br>Proline Synthesis		locus|R51_01410		unknown	C:cytoplasm	Cytoplasmic	Cytoplasmic			0.504901	0
1378	CDS	R51_1	1468345	1469592	90.9091	1	+	1248	Gamma-glutamyl phosphate reductase (EC 1.2.1.41)	Proline Synthesis		locus|R51_01411		C (cytoplasmic)	C:cytoplasm	Cytoplasmic	Cytoplasmic			0.24676	0
1379	CDS	R51_1	1470961	1469798	90.9091	-1	-	1164	Mobile element protein	- none -		locus|R51_01413		unknown	C:cytoplasm	Cytoplasmic	Cytoplasmic			0.468138	0
1380	CDS	R51_1	1471328	1471191	14.0371	-2	-	138	Formate dehydrogenase N alpha subunit (EC 1.2.1.2) @ selenocysteine-containing	Formate dehydrogenase; <br>Formate hydrogenase; <br>Selenocysteine metabolism		locus|R51_01414		unknown	C:plasma membrane	Cytoplasmic	Unknown			0.312353	1
1381	CDS	R51_1	1471684	1471400	32.4479	-1	-	285	Phage protein	- none -		locus|R51_01415		C (cytoplasmic)	C:cytoplasm	Cytoplasmic	Cytoplasmic			0.330278	0
1382	CDS	R51_1	1471961	1471677	49.3932	-2	-	285	FIG00641909: hypothetical protein	- none -		locus|R51_01416		P (Periplasm)	C:plasma membrane	Periplasmic	Unknown			0.28699	1
1383	CDS	R51_1	1472752	1471961	81.4518	-1	-	792	Phage protein	- none -		locus|R51_01417		C (cytoplasmic)	C:cytoplasm	Cytoplasmic	Cytoplasmic			0.501537	0
1384	CDS	R51_1	1473331	1472822	90.2908	-1	-	510	Phage eae protein	- none -		locus|R51_01418		C (cytoplasmic)	C:cytoplasm	Cytoplasmic	Cytoplasmic			0.375025	0
1385	CDS	R51_1	1473498	1473328	0.801466	-3	-	171	Phage protein	- none -		locus|R51_01419		unknown	C:cytoplasm	Cytoplasmic	Unknown			0.232348	0
1386	CDS	R51_1	1473802	1473509	35.1958	-1	-	294	FIG01047205: hypothetical protein	- none -		locus|R51_01420		C (cytoplasmic)	C:cytoplasm	Cytoplasmic	Unknown			0.43839	0
1387	CDS	R51_1	1474840	1474133	90.2908	-1	-	708	Putative DNA-binding protein Erf	- none -		locus|R51_01421		C (cytoplasmic)	C:cytoplasm	Periplasmic	Cytoplasmic			0.311825	0
1388	CDS	R51_1	1474980	1474837	28.4864	-3	-	144	DNA recombinase, phage-associated	- none -		locus|R51_01422		unknown	C:cytoplasm	Cytoplasmic	Unknown			0.329635	0
1389	CDS	R51_1	1475158	1474970	44.218	-1	-	189	FIG01045708: hypothetical protein	- none -		locus|R51_01423		C (cytoplasmic)	C:cytoplasm	Periplasmic	Unknown			0.524548	0
1390	CDS	R51_1	1475297	1475139	55.3469	-2	-	159	Phage protein	- none -		locus|R51_01424		unknown	C:cytoplasm	Cytoplasmic	Unknown			0.470633	0
1391	CDS	R51_1	1475696	1475382	24.8454	-2	-	315	Superinfection exclusion protein (Protein gp17)	- none -		locus|R51_01425		C (cytoplasmic)	C:cytoplasm	Cytoplasmic	Unknown			0.463064	0
1392	CDS	R51_1	1475972	1475847	54.4081	-2	-	126	hypothetical protein	- none -		locus|R51_01426		unknown	C:cytoplasm	Cytoplasmic	Unknown			0.554268	0
1393	CDS	R51_1	1476259	1475972	57.2475	-1	-	288	Phage protein	- none -		locus|R51_01427		C (cytoplasmic)	C:cytoplasm	Cytoplasmic	Unknown			0.443232	0
1394	CDS	R51_1	1476727	1476293	73.7119	-1	-	435	Pentapeptide repeat family protein	- none -		locus|R51_01428		C (cytoplasmic)	C:plasma membrane	Cytoplasmic	Cytoplasmic			0.577896	0
1395	CDS	R51_1	1477005	1476811	4.87749	-3	-	195	antirestriction protein	- none -		locus|R51_01429		C (cytoplasmic)	C:cytoplasm	Cytoplasmic	Unknown			0.648635	0
1396	CDS	R51_1	1477219	1477806	56.3087	1	+	588	superinfection exclusion	- none -		locus|R51_01430		IM (inner membrane)	C:plasma membrane	InnerMembrane	Unknown			0.943568	2
1397	CDS	R51_1	1478121	1477819	51.3396	-3	-	303	Phage antitermination protein N	Phage nin genes - N-independent survival		locus|R51_01431		C (cytoplasmic)	C:cytoplasm	Cytoplasmic	Unknown		Probable ANTIGEN	0.383351	0
1398	CDS	R51_1	1478485	1478688	52.599	1	+	204	hypothetical protein	- none -		locus|R51_01432		C (cytoplasmic)	C:cytoplasm	Cytoplasmic	Unknown			0.275785	0
1399	CDS	R51_1	1479770	1478727	90.9091	-2	-	1044	ORF23	- none -		locus|R51_01433		C (cytoplasmic)	C:cytoplasm	Cytoplasmic	Cytoplasmic			0.28498	0
1400	CDS	R51_1	1480606	1479971	85.4362	-1	-	636	COG2932: Predicted transcriptional regulator	- none -		locus|R51_01434		C (cytoplasmic)	C:cytoplasm	Cytoplasmic	Cytoplasmic		Probable ANTIGEN	0.321366	0
1401	CDS	R51_1	1480771	1480986	9.02221	1	+	216	Cro	- none -		locus|R51_01435		C (cytoplasmic)	C:cytoplasm	Cytoplasmic	Unknown			0.629433	0
1402	CDS	R51_1	1481097	1481378	56.1484	3	+	282	cII	- none -		locus|R51_01436		C (cytoplasmic)	C:cytoplasm	Cytoplasmic	Unknown			0.385862	0
1403	CDS	R51_1	1481413	1481574	3.36616	1	+	162	FIG00642795: hypothetical protein	- none -		locus|R51_01437		unknown	C:cytoplasm	Cytoplasmic	Unknown			0.59876	0
1404	CDS	R51_1	1481561	1482382	90.9091	2	+	822	Origin specific replication initiation factor	Phage replication		locus|R51_01438		C (cytoplasmic)	C:cytoplasm	Periplasmic	Cytoplasmic			0.432479	0
1405	CDS	R51_1	1482379	1483755	92.3059	1	+	1377	Phage replicative DNA helicase (EC 3.6.1.-)	Phage replication		locus|R51_01439		unknown	C:cytoplasm	Cytoplasmic	Cytoplasmic			0.777955	0
1406	CDS	R51_1	1483752	1484021	36.0888	3	+	270	ORF30	- none -		locus|R51_01440		C (cytoplasmic)	C:cytoplasm	Cytoplasmic	Cytoplasmic			0.511437	0
1407	CDS	R51_1	1484095	1484532	60.6824	1	+	438	Phage NinB DNA recombination	Phage nin genes - N-independent survival		locus|R51_01441		C (cytoplasmic)	C:cytoplasm	Cytoplasmic	Unknown			0.934835	0
1408	CDS	R51_1	1484848	1485189	59.5603	1	+	342	Phage NinX	Phage nin genes - N-independent survival		locus|R51_01442		C (cytoplasmic)	C:cytoplasm	Cytoplasmic	Unknown			0.811186	0
1409	CDS	R51_1	1485182	1485358	33.4326	2	+	177	Phage NinF	Phage nin genes - N-independent survival		locus|R51_01443		unknown	C:cytoplasm	Cytoplasmic	Unknown		Probable ANTIGEN	0.601239	0
1410	CDS	R51_1	1485351	1485962	76.7804	3	+	612	Phage NinG rap recombination	Phage nin genes - N-independent survival		locus|R51_01444		C (cytoplasmic)	C:cytoplasm	Cytoplasmic	Cytoplasmic			0.231511	0
1411	CDS	R51_1	1485959	1486183	30.2496	2	+	225	Phage NinY	Phage nin genes - N-independent survival		locus|R51_01445		C (cytoplasmic)	C:cytoplasm	Cytoplasmic	Unknown			0.524806	0
1412	CDS	R51_1	1486180	1486383	14.7928	1	+	204	Phage NinH	Phage nin genes - N-independent survival		locus|R51_01446		C (cytoplasmic)	C:cytoplasm	Cytoplasmic	Unknown			0.405802	0
1413	CDS	R51_1	1486364	1486543	71.8342	2	+	180	Phage Nin protein	Phage nin genes - N-independent survival		locus|R51_01447		unknown	C:cytoplasm	Cytoplasmic	Unknown			0.300606	0
1414	CDS	R51_1	1486540	1487313	90.9091	1	+	774	Phage antitermination protein Q	Phage nin genes - N-independent survival		locus|R51_01448		unknown	C:cytoplasm	Periplasmic	Periplasmic			0.588946	0
1415	CDS	R51_1	1487744	1487947	61.9418	2	+	204	Phage holin, class II	Phage lysis modules		locus|R51_01449		IM (inner membrane)	C:cytoplasm	Cytoplasmic	Unknown		Probable ANTIGEN	0.403726	2
1416	CDS	R51_1	1487919	1488422	89.8099	3	+	504	Phage lysin (EC 3.2.1.17)	Phage lysis modules		locus|R51_01450		unknown	C:extracellular space	Periplasmic	Unknown	SP		0.310182	1
1417	CDS	R51_1	1488419	1488886	90.3824	2	+	468	Phage outer membrane lytic protein Rz; Endopeptidase (EC 3.4.-.-)	Phage lysis modules		locus|R51_01451		P (Periplasm)	C:plasma membrane	OuterMembrane	Unknown		Probable ANTIGEN	0.376184	1
1418	CDS	R51_1	1489099	1489629	63.3158	1	+	531	FIG01048207: hypothetical protein	- none -		locus|R51_01452		unknown	C:cytoplasm	Cytoplasmic	Cytoplasmic			0.475608	0
1419	CDS	R51_1	1489852	1490094	81.9556	1	+	243	Orf80	- none -		locus|R51_01453		C (cytoplasmic)	C:cytoplasm	Cytoplasmic	Unknown			0.418569	0
1420	CDS	R51_1	1490098	1490487	87.6803	1	+	390	Phage protein	- none -		locus|R51_01454		C (cytoplasmic)	C:cytoplasm	Cytoplasmic	Unknown			0.291264	0
1421	CDS	R51_1	1490487	1490891	90.6343	3	+	405	Phage tail fibers	Phage tail fiber proteins		locus|R51_01455		EC (Extracellular)	C:cytoplasm	Extracellular	Unknown		Probable ANTIGEN	0.510521	0
1422	CDS	R51_1	1490895	1491383	63.1326	3	+	489	Phage terminase, small subunit	Phage packaging machinery		locus|R51_01456		C (cytoplasmic)	C:cytoplasm	Cytoplasmic	Cytoplasmic			0.363738	0
1423	CDS	R51_1	1491361	1492860	90.9091	1	+	1500	Phage terminase, large subunit	Phage packaging machinery		locus|R51_01457		C (cytoplasmic)	C:cytoplasm	Cytoplasmic	Cytoplasmic			0.464516	0
1424	CDS	R51_1	1492860	1495037	95.3286	3	+	2178	Phage portal protein	Phage packaging machinery		locus|R51_01458		C (cytoplasmic)	C:cytoplasm	Periplasmic	Cytoplasmic			0.350805	0
1425	CDS	R51_1	1495051	1495962	90.9091	1	+	912	Phage capsid and scaffold	Phage capsid proteins		locus|R51_01459		C (cytoplasmic)	C:cytoplasm	Periplasmic	Cytoplasmic			0.579456	0
1426	CDS	R51_1	1495962	1497254	91.8251	3	+	1293	Phage capsid protein	Phage capsid proteins		locus|R51_01460		C (cytoplasmic)	C:cytoplasm	OuterMembrane	Unknown			0.714001	0
1427	CDS	R51_1	1497295	1497855	90.245	1	+	561	ORF54	- none -		locus|R51_01461		C (cytoplasmic)	C:cytoplasm	Cytoplasmic	Cytoplasmic		Probable ANTIGEN	0.469262	0
1428	CDS	R51_1	1497839	1498339	90.3824	2	+	501	DNA stabilization, phage-associated	- none -		locus|R51_01462		C (cytoplasmic)	C:cytoplasm	Periplasmic	Unknown			0.798533	0
1429	CDS	R51_1	1498299	1499717	90.9091	3	+	1419	DNA stabilization, phage-associated	- none -		locus|R51_01463		unknown	C:cytoplasm	OuterMembrane	Unknown			0.563961	0
1430	CDS	R51_1	1499721	1500422	90.9091	3	+	702	DNA stabilization, phage-associated	- none -		locus|R51_01464		C (cytoplasmic)	C:cytoplasm	OuterMembrane	Unknown		Probable ANTIGEN	0.753542	0
1431	CDS	R51_1	1500422	1500877	68.9031	2	+	456	Phage capsid and scaffold	Phage capsid proteins		locus|R51_01465		C (cytoplasmic)	C:cytoplasm	Cytoplasmic	Cytoplasmic			0.584691	0
1432	CDS	R51_1	1500880	1501569	90.9091	1	+	690	Phage DNA transfer protein	- none -		locus|R51_01466		EC (Extracellular)	C:cytoplasm	Extracellular	Unknown		Probable ANTIGEN	0.894824	0
1433	CDS	R51_1	1501580	1503016	95.0767	2	+	1437	Phage DNA transfer protein	- none -		locus|R51_01467		EC (Extracellular)	C:cytoplasm	Extracellular	OuterMembrane		Probable ANTIGEN	0.319808	0
1434	CDS	R51_1	1503016	1504992	98.649	1	+	1977	Phage DNA transfer protein	- none -		locus|R51_01468		C (cytoplasmic)	C:cytoplasm	OuterMembrane	OuterMembrane		Probable ANTIGEN	0.317873	1
1435	CDS	R51_1	1505693	1505445	37.8521	-2	-	249	Mnt	- none -		locus|R51_01469		C (cytoplasmic)	C:cytoplasm	Cytoplasmic	Unknown			0.405521	0
1436	CDS	R51_1	1505829	1507832	92.3517	3	+	2004	Phage tail spike protein	Phage tail proteins		locus|R51_01470		EC (Extracellular)	C:cytoplasm	Extracellular	Unknown		Probable ANTIGEN	0.352592	0
1437	CDS	R51_1	1509348	1507891	90.9091	-3	-	1458	O-antigen conversion: translocase	- none -		locus|R51_01471		IM (inner membrane)	C:plasma membrane	InnerMembrane	CytoplasmicMembrane			0.322818	11
1438	CDS	R51_1	1510270	1509338	90.2908	-1	-	933	Polymyxin resistance protein ArnC, glycosyl transferase (EC 2.4.-.-)	Lipid A-Ara4N pathway ( Polymyxin resistance )		locus|R51_01472		IM (inner membrane)	C:plasma membrane	InnerMembrane	CytoplasmicMembrane			0.526455	2
1439	CDS	R51_1	1510629	1510267	48.5917	-3	-	363	Bactoprenol-linked glucose translocase	- none -		locus|R51_01473		IM (inner membrane)	C:plasma membrane	InnerMembrane	CytoplasmicMembrane			0.71065	4
1440	CDS	R51_1	1511738	1511211	75.8873	-2	-	528	Mobile element protein	- none -		locus|R51_01474		C (cytoplasmic)	C:cytoplasm	Periplasmic	Cytoplasmic		Probable ANTIGEN	0.3381	0
1441	CDS	R51_1	1512034	1511735	71.4907	-1	-	300	Mobile element protein	- none -		locus|R51_01475		C (cytoplasmic)	C:cytoplasm	Cytoplasmic	Unknown		Probable ANTIGEN	0.898636	0
1442	CDS	R51_1	1512101	1512469	60.5679	2	+	369	FIG01045267: hypothetical protein	- none -		locus|R51_01476		C (cytoplasmic)	C:cytoplasm	Cytoplasmic	Unknown		Probable ANTIGEN	0.478248	0
1443	CDS	R51_1	1512414	1512542	16.327	3	+	129	Glycerol dehydratase reactivation factor large subunit	- none -		locus|R51_01477		unknown	C:cytoplasm	Cytoplasmic	Unknown		Probable ANTIGEN	0.449714	0
1444	CDS	R51_1	1512676	1512975	71.8342	1	+	300	FIG074102: hypothetical protein	- none -		locus|R51_01478		C (cytoplasmic)	C:cytoplasm	Periplasmic	Unknown			0.353994	0
1445	CDS	R51_1	1513323	1514555	90.0389	3	+	1233	putative permease	- none -		locus|R51_01479		IM (inner membrane)	C:plasma membrane	InnerMembrane	CytoplasmicMembrane			0.361628	12
1446	CDS	R51_1	1514687	1516108	90.932	2	+	1422	3-isopropylmalate dehydratase large subunit (EC 4.2.1.33)	Branched-Chain Amino Acid Biosynthesis; <br>Leucine Biosynthesis		locus|R51_01480		C (cytoplasmic)	C:cytoplasm	Cytoplasmic	Cytoplasmic			0.382386	0
1447	CDS	R51_1	1516110	1516217	29.1504	3	+	108	3-isopropylmalate dehydratase small subunit (EC 4.2.1.33)	Branched-Chain Amino Acid Biosynthesis; <br>Leucine Biosynthesis		locus|R51_01481		unknown		Cytoplasmic	Unknown			0.338049	0
1448	CDS	R51_1	1516233	1516736	60.0183	3	+	504	3-isopropylmalate dehydratase small subunit (EC 4.2.1.33)	Branched-Chain Amino Acid Biosynthesis; <br>Leucine Biosynthesis		locus|R51_01482		C (cytoplasmic)	C:cytoplasm	Cytoplasmic	CytoplasmicMembrane			0.701399	0
1449	CDS	R51_1	1516751	1517629	90.9091	2	+	879	Fumarylacetoacetate hydrolase family protein	Gentisate degradation; <br>Salicylate and gentisate catabolism		locus|R51_01483		C (cytoplasmic)	C:cytoplasm	Cytoplasmic	Cytoplasmic			0.341035	0
1450	CDS	R51_1	1517629	1518543	90.9091	1	+	915	Putative hydrolase or acyltransferase	- none -		locus|R51_01484		C (cytoplasmic)	C:cytoplasm	Cytoplasmic	Extracellular			0.521625	0
1451	CDS	R51_1	1518577	1519542	90.9091	1	+	966	Putative LysR family transcriptional regulator	- none -		locus|R51_01485		C (cytoplasmic)	C:cytoplasm	Cytoplasmic	Cytoplasmic			0.33636	0
1452	CDS	R51_1	1519759	1519487	70.758	-1	-	273	hypothetical protein	- none -		locus|R51_01486		C (cytoplasmic)	C:cytoplasm	Cytoplasmic	Unknown			0.308217	0
1453	CDS	R51_1	1520450	1520848	90.3824	2	+	399	Probable secreted protein	- none -		locus|R51_01487		EC (Extracellular)	C:extracellular space	Extracellular	Unknown	SP		0.448883	0
1454	CDS	R51_1	1521653	1520895	90.9091	-2	-	759	Putative pilus chaperone, PapD family	- none -		locus|R51_01488		OM (Outer Membrane)	C:plasma membrane	Periplasmic	Periplasmic	SP		0.455802	1
871	CDS	R51_1	930620	932353	97.6872	2	+	1734	Uncharacterized protein YtfM precursor	Cluster Ytf and putative sugar transporter; <br>Putative sugar ABC transporter (ytf cluster)		locus|R51_00894		EC (Extracellular)	C:cytoplasm	OuterMembrane	OuterMembrane	SP	Probable ANTIGEN	0.241661	0
1456	CDS	R51_1	1523257	1522949	90.9091	-1	-	309	outer membrane fimbrial usher protein	- none -		locus|R51_01490		unknown	C:cytoplasm	Periplasmic	OuterMembrane		Probable ANTIGEN	0.584278	0
881	CDS	R51_1	944816	945202	90.9091	2	+	387	Soluble cytochrome b562	Soluble cytochromes and functionally related electron carriers		locus|R51_00904		P (Periplasm)	C:extracellular space	Periplasmic	Periplasmic	SP	Probable ANTIGEN	0.290046	1
1458	CDS	R51_1	1526249	1525494	91.0007	-2	-	756	Putative fimbrial chaperone	- none -		locus|R51_01492		P (Periplasm)	C:plasma membrane	Periplasmic	Periplasmic	SP		0.684957	1
932	CDS	R51_1	994640	995137	90.9091	2	+	498	hypothetical protein	- none -		locus|R51_00956		EC (Extracellular)	C:extracellular space	Extracellular	Extracellular	SP	Probable ANTIGEN	0.4881	1
1460	CDS	R51_1	1527510	1527845	21.2045	3	+	336	Possible transmembrane regulator	- none -		locus|R51_01494		C (cytoplasmic)	C:cytoplasm	Cytoplasmic	Unknown			0.391399	0
1461	CDS	R51_1	1527848	1528243	22.899	2	+	396	Possible transmembrane regulator	- none -		locus|R51_01495		IM (inner membrane)	C:plasma membrane	Cytoplasmic	Unknown			0.290686	1
1462	CDS	R51_1	1528216	1528716	77.8338	1	+	501	Putative inner membrane protein	- none -		locus|R51_01496		P (Periplasm)	C:plasma membrane	Cytoplasmic	Unknown			0.338398	1
1463	CDS	R51_1	1529042	1530592	90.9091	2	+	1551	diguanylate cyclase/phosphodiesterase (GGDEF & EAL domains) with PAS/PAC sensor(s)	Bacterial hemoglobins		locus|R51_01497		IM (inner membrane)	C:plasma membrane	InnerMembrane	CytoplasmicMembrane			0.248427	2
1464	CDS	R51_1	1530692	1531435	87.2223	2	+	744	Possible transmembrane regulator	- none -		locus|R51_01498		IM (inner membrane)	C:cytoplasm	Cytoplasmic	Unknown		Probable ANTIGEN	0.233291	0
1465	CDS	R51_1	1531408	1531896	81.9556	1	+	489	Putative inner membrane protein	- none -		locus|R51_01499		IM (inner membrane)	C:outer membrane	Cytoplasmic	Unknown			0.859797	1
933	CDS	R51_1	995259	995999	90.9091	3	+	741	fimbrial chaperone protein	- none -		locus|R51_00957		OM (Outer Membrane)	C:extracellular space	OuterMembrane	Periplasmic	SP	Probable ANTIGEN	0.253932	0
1467	CDS	R51_1	1533078	1533605	40.371	3	+	528	Possible transcriptionl regulator	- none -		locus|R51_01501		C (cytoplasmic)	C:cytoplasm	Cytoplasmic	Cytoplasmic			0.579912	0
934	CDS	R51_1	996016	997050	91.2526	1	+	1035	Outer membrane fimbrial usher protein	- none -		locus|R51_00958		C (cytoplasmic)	C:extracellular space	OuterMembrane	OuterMembrane	SP	Probable ANTIGEN	0.326967	0
1469	CDS	R51_1	1534713	1534327	86.7186	-3	-	387	RND efflux system, outer membrane lipoprotein CmeC	Multidrug Resistance Efflux Pumps		locus|R51_01503		C (cytoplasmic)	C:cytoplasm	Cytoplasmic	Unknown			0.388022	0
1470	CDS	R51_1	1535784	1534744	90.9091	-3	-	1041	RND efflux system, outer membrane lipoprotein CmeC	Multidrug Resistance Efflux Pumps		locus|R51_01504		P (Periplasm)	C:outer membrane	Cytoplasmic	Unknown	SP		0.385963	0
1471	CDS	R51_1	1538968	1535801	90.9091	-1	-	3168	RND efflux system, inner membrane transporter CmeB	Multidrug Resistance Efflux Pumps		locus|R51_01505		IM (inner membrane)	C:plasma membrane	InnerMembrane	CytoplasmicMembrane			0.220178	12
1472	CDS	R51_1	1540191	1538965	92.7181	-3	-	1227	RND efflux system, membrane fusion protein CmeA	Multidrug Resistance Efflux Pumps		locus|R51_01506		OM (Outer Membrane)	C:plasma membrane	Periplasmic	CytoplasmicMembrane			0.401813	1
1473	CDS	R51_1	1540468	1542771	90.9091	1	+	2304	Lead, cadmium, zinc and mercury transporting ATPase (EC 3.6.3.3) (EC 3.6.3.5); Copper-translocating P-type ATPase (EC 3.6.3.4)	Copper Transport System; <br>Copper homeostasis		locus|R51_01507		IM (inner membrane)	C:plasma membrane	InnerMembrane	CytoplasmicMembrane			0.553205	8
1474	CDS	R51_1	1542768	1543232	88.9856	3	+	465	Cu(I)-responsive transcriptional regulator	Copper homeostasis		locus|R51_01508		C (cytoplasmic)	C:cytoplasm	Cytoplasmic	Cytoplasmic			0.351313	0
1475	CDS	R51_1	1543310	1543504	72.4067	2	+	195	Putative copper chaperone	- none -		locus|R51_01509		C (cytoplasmic)	C:cytoplasm	Cytoplasmic	Unknown			0.325908	0
1476	CDS	R51_1	1543796	1545049	90.7717	2	+	1254	Putative metabolite transport protein	- none -		locus|R51_01510		IM (inner membrane)	C:plasma membrane	InnerMembrane	CytoplasmicMembrane			0.788793	10
1477	CDS	R51_1	1545238	1547049	95.7866	1	+	1812	Type III restriction-modification system methylation subunit (EC 2.1.1.72)	Restriction-Modification System		locus|R51_01511		C (cytoplasmic)	C:cytoplasm	OuterMembrane	Unknown			0.469082	0
1478	CDS	R51_1	1547089	1548171	90.9091	1	+	1083	Type III restriction-modification system StyLTI enzyme res (EC 3.1.21.5)	Restriction-Modification System		locus|R51_01512		C (cytoplasmic)	C:cytoplasm	Cytoplasmic	Unknown			0.387835	0
1479	CDS	R51_1	1548222	1549982	96.7712	3	+	1761	Type III restriction-modification system StyLTI enzyme res (EC 3.1.21.5)	Restriction-Modification System		locus|R51_01513		C (cytoplasmic)	C:cytoplasm	Cytoplasmic	Cytoplasmic			0.305018	0
1480	CDS	R51_1	1550259	1550360	76.1392	3	+	102	hypothetical protein	- none -		locus|R51_01514		unknown		Cytoplasmic	Unknown		Probable ANTIGEN	0.46039	0
1481	CDS	R51_1	1550477	1551880	90.9091	2	+	1404	putative Cytochrome bd2, subunit I	Terminal cytochrome d ubiquinol oxidases; <br>Terminal cytochrome oxidases		locus|R51_01515		IM (inner membrane)	C:plasma membrane	InnerMembrane	CytoplasmicMembrane			0.312108	9
1482	CDS	R51_1	1551877	1552887	67.5292	1	+	1011	putative Cytochrome bd2, subunit II	Terminal cytochrome d ubiquinol oxidases; <br>Terminal cytochrome oxidases		locus|R51_01516		IM (inner membrane)	C:plasma membrane	InnerMembrane	CytoplasmicMembrane			0.387149	8
1483	CDS	R51_1	1552887	1553018	36.7529	3	+	132	putative Cytochrome bd2, subunit II	Terminal cytochrome d ubiquinol oxidases; <br>Terminal cytochrome oxidases		locus|R51_01517		unknown	C:plasma membrane	Cytoplasmic	CytoplasmicMembrane			0.753322	1
1484	CDS	R51_1	1553222	1553995	90.3595	2	+	774	Transcriptional regulator, AraC family	- none -		locus|R51_01518		C (cytoplasmic)	C:cytoplasm	Periplasmic	Unknown			0.253461	0
995	CDS	R51_1	1052324	1051863	90.9091	-2	-	462	Putative glycoprotein/receptor	- none -		locus|R51_01019		P (Periplasm)	C:extracellular space	Extracellular	Extracellular	SP	Probable ANTIGEN	0.359384	1
1486	CDS	R51_1	1557157	1556525	54.8431	-1	-	633	Threonine efflux protein	- none -		locus|R51_01520		IM (inner membrane)	C:plasma membrane	InnerMembrane	CytoplasmicMembrane			0.501903	6
1487	CDS	R51_1	1557389	1557664	83.2837	2	+	276	FIG00639237: hypothetical protein	- none -		locus|R51_01521		P (Periplasm)	C:extracellular space	Periplasmic	Unknown	SP		0.391255	0
1488	CDS	R51_1	1559425	1557800	90.9091	-1	-	1626	Propionate catabolism operon regulatory protein PrpR	Methylcitrate cycle		locus|R51_01522		C (cytoplasmic)	C:cytoplasm	Cytoplasmic	Cytoplasmic			0.333897	0
1489	CDS	R51_1	1559691	1560578	90.7717	3	+	888	Methylisocitrate lyase (EC 4.1.3.30)	Methylcitrate cycle; <br>Propionate-CoA to Succinate Module		locus|R51_01523		unknown	C:cytoplasm	Cytoplasmic	Cytoplasmic			0.234295	0
1490	CDS	R51_1	1560701	1561870	90.9091	2	+	1170	2-methylcitrate synthase (EC 2.3.3.5)	Methylcitrate cycle; <br>Propionate-CoA to Succinate Module		locus|R51_01524		C (cytoplasmic)	C:cytoplasm	Cytoplasmic	Cytoplasmic			0.408072	0
1491	CDS	R51_1	1561908	1563359	90.9091	3	+	1452	2-methylcitrate dehydratase (EC 4.2.1.79)	Methylcitrate cycle; <br>Propionate-CoA to Succinate Module		locus|R51_01525		C (cytoplasmic)	C:cytoplasm	Cytoplasmic	Cytoplasmic			0.417606	0
1492	CDS	R51_1	1563400	1565286	90.9091	1	+	1887	Propionate--CoA ligase (EC 6.2.1.17)	Methylcitrate cycle; <br>Propionate-CoA to Succinate Module		locus|R51_01526		IM (inner membrane)	C:cytoplasm	Cytoplasmic	Cytoplasmic			0.332541	0
1493	CDS	R51_1	1566364	1565390	90.7717	-1	-	975	Porphobilinogen synthase (EC 4.2.1.24)	Heme and Siroheme Biosynthesis; <br>Zinc regulated enzymes		locus|R51_01527		C (cytoplasmic)	C:cytoplasm	Cytoplasmic	Cytoplasmic			0.268401	0
1011	CDS	R51_1	1065362	1065979	90.932	2	+	618	Osmotically inducible protein OsmY	Osmoregulation		locus|R51_01037		unknown	C:extracellular space	Periplasmic	Periplasmic	SP	Probable ANTIGEN	0.393279	0
1495	CDS	R51_1	1569978	1570601	60.5679	3	+	624	FIG00637869: hypothetical protein	- none -		locus|R51_01529		C (cytoplasmic)	C:cytoplasm	Cytoplasmic	Cytoplasmic			0.343209	0
1496	CDS	R51_1	1571803	1570646	94.4355	-1	-	1158	Penicillin-binding protein AmpH	Peptidoglycan Crosslinking of Peptide Stems		locus|R51_01530		P (Periplasm)	C:extracellular space	Periplasmic	Periplasmic	SP		0.307573	0
1497	CDS	R51_1	1572150	1573370	90.9091	3	+	1221	SbmA protein	- none -		locus|R51_01531		IM (inner membrane)	C:plasma membrane	InnerMembrane	CytoplasmicMembrane			0.271144	7
1498	CDS	R51_1	1573385	1574479	90.9091	2	+	1095	Putative outer membrane lipoprotein	- none -		locus|R51_01532		P (Periplasm)	C:extracellular space	Periplasmic	Unknown	SP		0.651172	0
1499	CDS	R51_1	1574825	1574517	6.43462	-2	-	309	Putative inner membrane protein	- none -		locus|R51_01533		IM (inner membrane)	C:plasma membrane	InnerMembrane	CytoplasmicMembrane			0.508895	2
1500	CDS	R51_1	1575093	1575308	4.05313	3	+	216	Putative inner membrane protein	- none -		locus|R51_01534		IM (inner membrane)	C:plasma membrane	InnerMembrane	CytoplasmicMembrane			0.342455	2
1501	CDS	R51_1	1576446	1575334	90.9091	-3	-	1113	D-alanine--D-alanine ligase A (EC 6.3.2.4)	Peptidoglycan Biosynthesis; <br>Peptidoglycan biosynthesis--gjo; <br>cell division cluster containing FtsQ		locus|R51_01535		C (cytoplasmic)	C:cytoplasm	Cytoplasmic	Cytoplasmic			0.36897	0
1502	CDS	R51_1	1576536	1577219	90.3824	3	+	684	FIG01045207: hypothetical protein	- none -		locus|R51_01536		IM (inner membrane)	C:plasma membrane	Periplasmic	Unknown			0.252368	1
1503	CDS	R51_1	1577523	1578599	87.6803	3	+	1077	Multidrug-efflux transporter, major facilitator superfamily (MFS) (TC 2.A.1)	Multidrug Resistance Efflux Pumps		locus|R51_01537		IM (inner membrane)	C:plasma membrane	InnerMembrane	CytoplasmicMembrane			0.481905	9
1504	CDS	R51_1	1578896	1579156	23.8608	2	+	261	protein iraP	- none -		locus|R51_01538		C (cytoplasmic)	C:cytoplasm	Cytoplasmic	Unknown			0.506015	0
1505	CDS	R51_1	1579505	1579825	88.8482	2	+	321	Phosphate starvation-inducible protein PsiF	- none -		locus|R51_01539		P (Periplasm)	C:cytoplasm	Periplasmic	Unknown	SP		0.833929	1
1506	CDS	R51_1	1580066	1581028	71.422	2	+	963	Protein YaiC	- none -		locus|R51_01540		IM (inner membrane)	C:plasma membrane	InnerMembrane	CytoplasmicMembrane			0.625323	4
1507	CDS	R51_1	1581852	1581043	90.9091	-3	-	810	Pyrroline-5-carboxylate reductase (EC 1.5.1.2)	A Hypothetical Protein Related to Proline Metabolism; <br>CBSS-630.2.peg.3360; <br>Proline Synthesis		locus|R51_01541		C (cytoplasmic)	C:cytoplasm	Cytoplasmic	Cytoplasmic			0.295107	0
1508	CDS	R51_1	1581992	1582447	89.7183	2	+	456	Protein YaiI	CBSS-562.2.peg.5158 SK3 including		locus|R51_01542		C (cytoplasmic)	C:cytoplasm	Cytoplasmic	Cytoplasmic			0.455795	0
1509	CDS	R51_1	1582632	1583177	80.3526	3	+	546	Shikimate kinase III (EC 2.7.1.71)	CBSS-562.2.peg.5158 SK3 including; <br>Chorismate Synthesis; <br>Common Pathway For Synthesis of Aromatic Compounds (DAHP synthase to chorismate)		locus|R51_01543		unknown	C:cytoplasm	Cytoplasmic	Cytoplasmic			0.668122	0
1510	CDS	R51_1	1583204	1583395	20.6549	2	+	192	Protein YaiA	CBSS-562.2.peg.5158 SK3 including		locus|R51_01544		P (Periplasm)	C:cytoplasm	Cytoplasmic	Unknown			0.342386	0
1511	CDS	R51_1	1583646	1584323	81.4518	3	+	678	AroM protein	CBSS-562.2.peg.5158 SK3 including		locus|R51_01545		C (cytoplasmic)	C:extracellular space	Cytoplasmic	Cytoplasmic			0.392815	0
1512	CDS	R51_1	1584394	1584678	87.5658	1	+	285	Cytoplasmic protein YaiE	CBSS-562.2.peg.5158 SK3 including		locus|R51_01546		unknown	C:cytoplasm	Cytoplasmic	Unknown		Probable ANTIGEN	0.354333	0
1513	CDS	R51_1	1585627	1584716	90.9091	-1	-	912	DNA recombination-dependent growth factor C	CBSS-562.2.peg.5158 SK3 including; <br>DNA repair, bacterial		locus|R51_01547		C (cytoplasmic)	C:cytoplasm	Cytoplasmic	Cytoplasmic			0.293284	0
1514	CDS	R51_1	1585753	1586661	90.9091	1	+	909	Glucokinase, ROK family (EC 2.7.1.2)	Beta-Glucoside Metabolism		locus|R51_01548		C (cytoplasmic)	C:cytoplasm	Cytoplasmic	Cytoplasmic		Probable ANTIGEN	0.270991	0
1515	CDS	R51_1	1587855	1586683	87.8177	-3	-	1173	Protein AraJ precursor	L-Arabinose utilization		locus|R51_01549		IM (inner membrane)	C:plasma membrane	InnerMembrane	CytoplasmicMembrane			0.424933	12
1516	CDS	R51_1	1591168	1588028	95.7637	-1	-	3141	Exonuclease SbcC	DNA repair, bacterial; <br>Rad50-Mre11 DNA repair cluster		locus|R51_01550		C (cytoplasmic)	C:cytoplasm	OuterMembrane	Cytoplasmic			0.31426	0
1517	CDS	R51_1	1592367	1591165	90.9091	-3	-	1203	Exonuclease SbcD	DNA repair, bacterial; <br>Rad50-Mre11 DNA repair cluster		locus|R51_01551		C (cytoplasmic)	C:cytoplasm	Cytoplasmic	Cytoplasmic			0.234268	0
1518	CDS	R51_1	1592580	1593269	89.6954	3	+	690	Phosphate regulon transcriptional regulatory protein PhoB (SphR)	High affinity phosphate transporter and control of PHO regulon; <br>PhoR-PhoB two-component regulatory system; <br>Phosphate metabolism		locus|R51_01552		C (cytoplasmic)	C:cytoplasm	Cytoplasmic	Cytoplasmic			0.422779	0
1519	CDS	R51_1	1593339	1594634	90.9091	3	+	1296	Phosphate regulon sensor protein PhoR (SphS) (EC 2.7.13.3)	High affinity phosphate transporter and control of PHO regulon; <br>PhoR-PhoB two-component regulatory system; <br>Phosphate metabolism		locus|R51_01553		IM (inner membrane)	C:plasma membrane	InnerMembrane	CytoplasmicMembrane			0.363423	1
1520	CDS	R51_1	1595043	1596362	90.6572	3	+	1320	Branched-chain amino acid transport system carrier protein	- none -		locus|R51_01554		IM (inner membrane)	C:plasma membrane	InnerMembrane	CytoplasmicMembrane			0.377161	12
1521	CDS	R51_1	1596437	1597807	90.9091	2	+	1371	Proline-specific permease proY	Proline, 4-hydroxyproline uptake and utilization		locus|R51_01555		IM (inner membrane)	C:plasma membrane	InnerMembrane	CytoplasmicMembrane			0.594629	12
1522	CDS	R51_1	1597969	1599786	90.9091	1	+	1818	Maltodextrin glucosidase (EC 3.2.1.20)	Maltose and Maltodextrin Utilization		locus|R51_01556		C (cytoplasmic)	C:cytoplasm	Cytoplasmic	Cytoplasmic			0.309241	0
1523	CDS	R51_1	1600460	1599858	90.9091	-2	-	603	Alkyl hydroperoxide reductase subunit C-like protein	Oxidative stress; <br>Thioredoxin-disulfide reductase		locus|R51_01557		C (cytoplasmic)	C:cytoplasm	Cytoplasmic	Cytoplasmic			0.353703	0
1524	CDS	R51_1	1601251	1600670	46.3476	-1	-	582	Acyl carrier protein phosphodiesterase (EC 3.1.4.14)	Fatty Acid Biosynthesis FASII		locus|R51_01558		C (cytoplasmic)	C:cytoplasm	Cytoplasmic	Cytoplasmic			0.382394	0
1525	CDS	R51_1	1601345	1602409	90.9091	2	+	1065	S-adenosylmethionine:tRNA ribosyltransferase-isomerase (EC 5.-.-.-)	CBSS-211586.1.peg.2832; <br>Queuosine-Archaeosine Biosynthesis; <br>Scaffold proteins for [4Fe-4S] cluster assembly (MRP family); <br>tRNA modification Bacteria; <br>tRNAmodification position 34		locus|R51_01559		C (cytoplasmic)	C:cytoplasm	Cytoplasmic	Cytoplasmic			0.341198	0
1526	CDS	R51_1	1602606	1603733	91.1152	3	+	1128	tRNA-guanine transglycosylase (EC 2.4.2.29)	CBSS-211586.1.peg.2832; <br>Queuosine-Archaeosine Biosynthesis; <br>Scaffold proteins for [4Fe-4S] cluster assembly (MRP family); <br>tRNA modification Bacteria; <br>tRNAmodification position 34		locus|R51_01560		C (cytoplasmic)	C:cytoplasm	Cytoplasmic	Cytoplasmic			0.419462	0
1527	CDS	R51_1	1603756	1604088	61.0946	1	+	333	Preprotein translocase subunit YajC (TC 3.A.5.1.1)	CBSS-211586.1.peg.2832		locus|R51_01561		IM (inner membrane)	C:plasma membrane	InnerMembrane	CytoplasmicMembrane			0.336482	1
1528	CDS	R51_1	1604149	1605963	90.9091	1	+	1815	Protein-export membrane protein SecD (TC 3.A.5.1.1)	CBSS-211586.1.peg.2832		locus|R51_01562		IM (inner membrane)	C:plasma membrane	InnerMembrane	CytoplasmicMembrane			0.386009	5
1529	CDS	R51_1	1605974	1606945	88.8482	2	+	972	Protein-export membrane protein SecF (TC 3.A.5.1.1)	CBSS-211586.1.peg.2832		locus|R51_01563		IM (inner membrane)	C:plasma membrane	InnerMembrane	CytoplasmicMembrane			0.624084	6
1530	CDS	R51_1	1607090	1607455	15.7545	2	+	366	Glyoxalase family protein	- none -		locus|R51_01564		unknown	C:cytoplasm	Cytoplasmic	Unknown			0.4452	0
1531	CDS	R51_1	1607481	1608173	61.9876	3	+	693	Transcriptional regulator, DeoR family	- none -		locus|R51_01565		C (cytoplasmic)	C:cytoplasm	Cytoplasmic	Cytoplasmic			0.473687	0
1532	CDS	R51_1	1608343	1608690	62.4456	1	+	348	hypothetical protein	- none -		locus|R51_01566		C (cytoplasmic)	C:cytoplasm	Cytoplasmic	Unknown			0.387061	0
1533	CDS	R51_1	1608972	1609235	44.0806	3	+	264	hypothetical protein	- none -		locus|R51_01567		C (cytoplasmic)	C:plasma membrane	Cytoplasmic	Unknown			0.452098	1
1034	CDS	R51_1	1089173	1089661	90.9091	2	+	489	Conserved uncharacterized protein CreA	Tolerance to colicin E2		locus|R51_01061		C (cytoplasmic)	C:extracellular space	Periplasmic	Unknown	SP	Probable ANTIGEN	0.375448	0
1039	CDS	R51_1	1094299	1094132	3.29746	-1	-	168	Putative major fimbrial subunit	- none -		locus|R51_01066		unknown	C:cytoplasm	Periplasmic	CytoplasmicMembrane	SP	Probable ANTIGEN	0.480726	0
1536	CDS	R51_1	1611173	1611622	72.6357	2	+	450	Ribonucleotide reductase transcriptional regulator NrdR	Ribonucleotide reduction		locus|R51_01570		C (cytoplasmic)	C:cytoplasm	Cytoplasmic	Cytoplasmic			0.473904	0
1537	CDS	R51_1	1611626	1612729	89.6267	2	+	1104	Diaminohydroxyphosphoribosylaminopyrimidine deaminase (EC 3.5.4.26) / 5-amino-6-(5-phosphoribosylamino)uracil reductase (EC 1.1.1.193)	Riboflavin, FMN and FAD metabolism; <br>Riboflavin, FMN and FAD metabolism; <br>Riboflavin, FMN and FAD metabolism in plants; <br>Riboflavin, FMN and FAD metabolism in plants; <br>Riboflavin synthesis cluster; <br>Riboflavin synthesis cluster		locus|R51_01571		C (cytoplasmic)	C:cytoplasm	Cytoplasmic	Cytoplasmic			0.41887	0
1538	CDS	R51_1	1612818	1613288	90.8633	3	+	471	6,7-dimethyl-8-ribityllumazine synthase (EC 2.5.1.78)	Riboflavin, FMN and FAD metabolism; <br>Riboflavin, FMN and FAD metabolism in plants; <br>Riboflavin synthesis cluster		locus|R51_01572		C (cytoplasmic)	C:cytoplasm	Cytoplasmic	Cytoplasmic		Probable ANTIGEN	0.701702	0
1539	CDS	R51_1	1613309	1613728	66.2698	2	+	420	Transcription termination protein NusB	Riboflavin synthesis cluster; <br>Transcription factors bacterial		locus|R51_01573		C (cytoplasmic)	C:cytoplasm	Cytoplasmic	Cytoplasmic			0.319284	0
1540	CDS	R51_1	1613807	1614787	85.8255	2	+	981	Thiamine-monophosphate kinase (EC 2.7.4.16)	5-FCL-like protein; <br>Riboflavin synthesis cluster; <br>Thiamin biosynthesis		locus|R51_01574		C (cytoplasmic)	C:cytoplasm	Cytoplasmic	Cytoplasmic			0.309294	0
1541	CDS	R51_1	1614765	1615280	29.7916	3	+	516	Phosphatidylglycerophosphatase A (EC 3.1.3.27)	Glycerolipid and Glycerophospholipid Metabolism in Bacteria; <br>Riboflavin synthesis cluster		locus|R51_01575		IM (inner membrane)	C:plasma membrane	InnerMembrane	CytoplasmicMembrane			0.263963	3
1542	CDS	R51_1	1616358	1615384	90.9091	-3	-	975	FIG00553873: hypothetical protein	- none -		locus|R51_01576		C (cytoplasmic)	C:cytoplasm	Cytoplasmic	Cytoplasmic			0.261806	0
1543	CDS	R51_1	1618277	1616415	94.1837	-2	-	1863	1-deoxy-D-xylulose 5-phosphate synthase (EC 2.2.1.7)	Isoprenoid Biosynthesis; <br>Nonmevalonate Branch of Isoprenoid Biosynthesis; <br>Pyridoxin (Vitamin B6) Biosynthesis; <br>Thiamin biosynthesis		locus|R51_01577		C (cytoplasmic)	C:cytoplasm	Cytoplasmic	Cytoplasmic			0.288184	0
1544	CDS	R51_1	1619200	1618301	83.9936	-1	-	900	Octaprenyl diphosphate synthase (EC 2.5.1.90) / Dimethylallyltransferase (EC 2.5.1.1) / (2E,6E)-farnesyl diphosphate synthase (EC 2.5.1.10) / Geranylgeranyl diphosphate synthase (EC 2.5.1.29)	Isoprenoid Biosynthesis; <br>Isoprenoid Biosynthesis; <br>Isoprenoid Biosynthesis: Interconversions; <br>Isoprenoinds for Quinones; <br>Isoprenoinds for Quinones; <br>Isoprenoinds for Quinones; <br>Isoprenoinds for Quinones; <br>Polyprenyl Diphosphate Biosynthesis; <br>Polyprenyl Diphosphate Biosynthesis; <br>Polyprenyl Diphosphate Biosynthesis		locus|R51_01578		C (cytoplasmic)	C:cytoplasm	Cytoplasmic	Cytoplasmic			0.524195	0
1545	CDS	R51_1	1619443	1619201	81.5663	-1	-	243	Exodeoxyribonuclease VII small subunit (EC 3.1.11.6)	DNA repair, bacterial; <br>Purine salvage cluster		locus|R51_01579		C (cytoplasmic)	C:cytoplasm	Cytoplasmic	Cytoplasmic		Probable ANTIGEN	0.481659	0
1546	CDS	R51_1	1619653	1621101	90.932	1	+	1449	tRNA S(4)U 4-thiouridine synthase (former ThiI) / Rhodanese-like domain required for thiamine synthesis	A cluster relating to vitamin metabolism; <br>A cluster relating to vitamin metabolism; <br>Thiamin biosynthesis; <br>Thiamin biosynthesis; <br>tRNA modification Archaea; <br>tRNA modification Archaea; <br>tRNA modification Bacteria; <br>tRNA modification Bacteria		locus|R51_01580		C (cytoplasmic)	C:cytoplasm	Cytoplasmic	Cytoplasmic			0.62156	0
1547	CDS	R51_1	1621942	1621145	74.2157	-1	-	798	2-aminoethylphosphonate ABC transporter permease protein II (TC 3.A.1.9.1)	Phosphonate metabolism		locus|R51_01581		IM (inner membrane)	C:plasma membrane	InnerMembrane	CytoplasmicMembrane			0.315269	6
1548	CDS	R51_1	1622805	1621936	56.3087	-3	-	870	2-aminoethylphosphonate ABC transporter permease protein I (TC 3.A.1.9.1)	Phosphonate metabolism		locus|R51_01582		IM (inner membrane)	C:plasma membrane	InnerMembrane	CytoplasmicMembrane			0.397404	7
1549	CDS	R51_1	1623917	1622808	90.8862	-2	-	1110	2-aminoethylphosphonate ABC transporter ATP-binding protein (TC 3.A.1.9.1)	Phosphonate metabolism		locus|R51_01583		C (cytoplasmic)	C:cytoplasm	Cytoplasmic	CytoplasmicMembrane			0.384831	0
1550	CDS	R51_1	1624936	1623923	97.0231	-1	-	1014	2-aminoethylphosphonate ABC transporter periplasmic binding component (TC 3.A.1.9.1)	Phosphonate metabolism		locus|R51_01584		EC (Extracellular)	C:extracellular space	Periplasmic	Unknown	SP		0.540808	0
1551	CDS	R51_1	1625853	1625134	89.787	-3	-	720	2-aminoethylphosphonate uptake and metabolism regulator	Phosphonate metabolism		locus|R51_01585		unknown	C:cytoplasm	Cytoplasmic	Cytoplasmic			0.352654	0
1552	CDS	R51_1	1625993	1627096	90.9091	2	+	1104	2-aminoethylphosphonate:pyruvate aminotransferase (EC 2.6.1.37)	Phosphonate metabolism		locus|R51_01586		C (cytoplasmic)	C:cytoplasm	Cytoplasmic	Cytoplasmic			0.329987	0
1553	CDS	R51_1	1627106	1627915	87.52	2	+	810	Phosphonoacetaldehyde hydrolase (EC 3.11.1.1)	Phosphonate metabolism		locus|R51_01587		C (cytoplasmic)	C:cytoplasm	Cytoplasmic	Cytoplasmic			0.351138	0
1554	CDS	R51_1	1628601	1628011	81.3831	-3	-	591	DJ-1/YajL/PfpI superfamily, includes chaperone protein YajL (former ThiJ), parkinsonism-associated protein DJ-1, peptidases PfpI, Hsp31	A cluster relating to vitamin metabolism		locus|R51_01588		C (cytoplasmic)	C:cytoplasm	Cytoplasmic	Cytoplasmic			0.455804	0
1555	CDS	R51_1	1629475	1628564	90.8633	-1	-	912	2-dehydropantoate 2-reductase (EC 1.1.1.169)	A cluster relating to vitamin metabolism; <br>Coenzyme A Biosynthesis		locus|R51_01589		C (cytoplasmic)	C:cytoplasm	Cytoplasmic	Cytoplasmic	SP		0.292842	0
1556	CDS	R51_1	1629601	1630092	90.703	1	+	492	FIG001943: hypothetical protein YajQ	A cluster relating to vitamin metabolism; <br>Broadly distributed proteins not in subsystems		locus|R51_01590		C (cytoplasmic)	C:cytoplasm	Cytoplasmic	Cytoplasmic			0.433652	0
1557	CDS	R51_1	1631503	1630139	90.9091	-1	-	1365	Putative transport protein	- none -		locus|R51_01591		IM (inner membrane)	C:plasma membrane	InnerMembrane	CytoplasmicMembrane			0.465303	12
1558	CDS	R51_1	1632028	1633539	97.4811	1	+	1512	corresponds to STY0478 from Accession AL513382: Salmonella typhi CT18	- none -		locus|R51_01592		P (Periplasm)	C:extracellular space	Periplasmic	Unknown	SP		0.875095	0
1559	CDS	R51_1	1633551	1634510	94.9164	3	+	960	Probable secreted protein	- none -		locus|R51_01593		OM (Outer Membrane)	C:extracellular space	OuterMembrane	Extracellular	SP		0.350491	0
1560	CDS	R51_1	1634516	1635043	69.5214	2	+	528	Putative periplasmic protein	- none -		locus|R51_01594		C (cytoplasmic)	C:cytoplasm	Cytoplasmic	Unknown			0.319023	0
1561	CDS	R51_1	1636015	1635125	89.2146	-1	-	891	Heme O synthase, protoheme IX farnesyltransferase (EC 2.5.1.-) COX10-CtaB	Biogenesis of cytochrome c oxidases; <br>CBSS-316057.3.peg.563		locus|R51_01595		IM (inner membrane)	C:plasma membrane	InnerMembrane	CytoplasmicMembrane			0.612239	9
1562	CDS	R51_1	1636356	1636027	9.91527	-3	-	330	Cytochrome O ubiquinol oxidase subunit IV (EC 1.10.3.-)	Terminal cytochrome O ubiquinol oxidase; <br>Terminal cytochrome oxidases		locus|R51_01596		IM (inner membrane)	C:plasma membrane	InnerMembrane	CytoplasmicMembrane			0.33621	3
1563	CDS	R51_1	1636970	1636356	66.2698	-2	-	615	Cytochrome O ubiquinol oxidase subunit III (EC 1.10.3.-)	Terminal cytochrome O ubiquinol oxidase; <br>Terminal cytochrome oxidases		locus|R51_01597		IM (inner membrane)	C:plasma membrane	InnerMembrane	CytoplasmicMembrane			0.445232	5
1564	CDS	R51_1	1638951	1636960	90.9091	-3	-	1992	Cytochrome O ubiquinol oxidase subunit I (EC 1.10.3.-)	Terminal cytochrome O ubiquinol oxidase; <br>Terminal cytochrome oxidases		locus|R51_01598		IM (inner membrane)	C:plasma membrane	InnerMembrane	CytoplasmicMembrane			0.287566	14
1565	CDS	R51_1	1639918	1638962	90.9091	-1	-	957	Cytochrome O ubiquinol oxidase subunit II (EC 1.10.3.-)	Terminal cytochrome O ubiquinol oxidase; <br>Terminal cytochrome oxidases		locus|R51_01599		IM (inner membrane)	C:plasma membrane	InnerMembrane	CytoplasmicMembrane	SP		0.562275	3
1566	CDS	R51_1	1641852	1640371	90.4282	-3	-	1482	AmpG permease	Recycling of Peptidoglycan Amino Acids		locus|R51_01600		IM (inner membrane)	C:plasma membrane	InnerMembrane	CytoplasmicMembrane			0.365898	14
1567	CDS	R51_1	1642522	1641890	90.9091	-1	-	633	Hypothetical lipoprotein YajG precursor	CBSS-339671.5.peg.589		locus|R51_01601		OM (Outer Membrane)	C:plasma membrane	Periplasmic	Unknown	SP		0.698549	0
1568	CDS	R51_1	1642775	1643089	30.1122	2	+	315	Cell division protein BolA	Bacterial Cell Division; <br>CBSS-339671.5.peg.589		locus|R51_01602		C (cytoplasmic)	C:cytoplasm	Cytoplasmic	Unknown			0.446494	0
1569	CDS	R51_1	1643436	1644734	91.2755	3	+	1299	Cell division trigger factor (EC 5.2.1.8)	Bacterial Cell Division		locus|R51_01603		C (cytoplasmic)	C:cytoplasm	Cytoplasmic	Cytoplasmic			0.263284	0
1570	CDS	R51_1	1644981	1645604	90.9091	3	+	624	ATP-dependent Clp protease proteolytic subunit (EC 3.4.21.92)	Proteasome bacterial; <br>Proteolysis in bacteria, ATP-dependent; <br>cAMP signaling in bacteria		locus|R51_01604		C (cytoplasmic)	C:cytoplasm	Cytoplasmic	Cytoplasmic			0.286919	0
1571	CDS	R51_1	1645856	1647127	93.0845	2	+	1272	ATP-dependent Clp protease ATP-binding subunit ClpX	Proteasome bacterial; <br>Proteolysis in bacteria, ATP-dependent		locus|R51_01605		C (cytoplasmic)	C:cytoplasm	Cytoplasmic	Cytoplasmic			0.241475	0
1572	CDS	R51_1	1647313	1649667	97.8017	1	+	2355	ATP-dependent protease La (EC 3.4.21.53) Type I	Proteasome bacterial; <br>Proteolysis in bacteria, ATP-dependent		locus|R51_01606		C (cytoplasmic)	C:cytoplasm	Cytoplasmic	Cytoplasmic			0.35715	0
1573	CDS	R51_1	1649876	1650148	51.7747	2	+	273	DNA-binding protein HU-beta	DNA structural proteins, bacterial		locus|R51_01607		C (cytoplasmic)	C:cytoplasm	Cytoplasmic	Cytoplasmic		Probable ANTIGEN	0.373708	0
1574	CDS	R51_1	1650439	1652310	98.5116	1	+	1872	Peptidyl-prolyl cis-trans isomerase PpiD (EC 5.2.1.8)	Peptidyl-prolyl cis-trans isomerase		locus|R51_01608		IM (inner membrane)	C:plasma membrane	Periplasmic	CytoplasmicMembrane			0.477423	1
1040	CDS	R51_1	1094897	1094340	90.9091	-2	-	558	putative fimbrial subunit	- none -		locus|R51_01067		EC (Extracellular)	C:extracellular space	Extracellular	Unknown	SP	Probable ANTIGEN	0.347649	1
1576	CDS	R51_1	1652938	1653336	53.9501	1	+	399	4-hydroxybenzoyl-CoA thioesterase family active site	Ton and Tol transport systems		locus|R51_01610		C (cytoplasmic)	C:cytoplasm	Cytoplasmic	Cytoplasmic			0.434344	0
1577	CDS	R51_1	1654137	1653442	90.9091	-3	-	696	Queuosine Biosynthesis QueC ATPase	Queuosine-Archaeosine Biosynthesis; <br>tRNA modification Bacteria		locus|R51_01611		C (cytoplasmic)	C:cytoplasm	Cytoplasmic	Cytoplasmic			0.520552	0
1578	CDS	R51_1	1655902	1654202	90.9091	-1	-	1701	Oligopeptide ABC transporter, periplasmic oligopeptide-binding protein OppA (TC 3.A.1.5.1)	ABC transporter oligopeptide (TC 3.A.1.5.1)		locus|R51_01612		C (cytoplasmic)	C:cytoplasm	Cytoplasmic	Unknown			0.270129	0
1579	CDS	R51_1	1656003	1656821	73.5058	3	+	819	HMP-PP hydrolase (pyridoxal phosphatase) Cof, detected in genetic screen for thiamin metabolic genes (PMID:15292217)	- none -		locus|R51_01613		C (cytoplasmic)	C:cytoplasm	Cytoplasmic	Cytoplasmic			0.434233	0
1580	CDS	R51_1	1657926	1656871	89.9931	-3	-	1056	Cysteine synthase B (EC 2.5.1.47)	Cysteine Biosynthesis		locus|R51_01614		C (cytoplasmic)	C:cytoplasm	Cytoplasmic	Cytoplasmic			0.278882	0
1581	CDS	R51_1	1658039	1658497	90.1305	2	+	459	Putative HTH-type transcriptional regulator ybaO	- none -		locus|R51_01615		C (cytoplasmic)	C:cytoplasm	Cytoplasmic	Cytoplasmic			0.374908	0
1582	CDS	R51_1	1658538	1660310	90.9091	3	+	1773	ATP-binding component	- none -		locus|R51_01616		IM (inner membrane)	C:plasma membrane	InnerMembrane	CytoplasmicMembrane			0.374436	6
1583	CDS	R51_1	1660303	1662084	90.9091	1	+	1782	putative multidrug transporter membrane ATP-binding components	- none -		locus|R51_01617		IM (inner membrane)	C:plasma membrane	InnerMembrane	CytoplasmicMembrane			0.302364	4
1584	CDS	R51_1	1662297	1662635	58.0032	3	+	339	Nitrogen regulatory protein P-II, glnK	Ammonia assimilation		locus|R51_01618		C (cytoplasmic)	C:cytoplasm	Cytoplasmic	CytoplasmicMembrane			0.408978	0
1585	CDS	R51_1	1662667	1663953	90.9091	1	+	1287	Ammonium transporter	Ammonia assimilation		locus|R51_01619		IM (inner membrane)	C:plasma membrane	InnerMembrane	CytoplasmicMembrane	SP		0.381002	12
1586	CDS	R51_1	1664913	1664053	90.1076	-3	-	861	Acyl-CoA thioesterase II (EC 3.1.2.-)	Acyl-CoA thioesterase II		locus|R51_01620		C (cytoplasmic)	C:cytoplasm	Cytoplasmic	Cytoplasmic			0.467209	0
1058	CDS	R51_1	1114065	1113661	90.4282	-3	-	405	FIG00638537: hypothetical protein	- none -		locus|R51_01085		OM (Outer Membrane)	C:extracellular space	Periplasmic	Unknown	SP	Probable ANTIGEN	0.341166	0
1588	CDS	R51_1	1666041	1665730	81.9098	-3	-	312	methylated-DNA--protein-cysteine methyltransferase-related protein	- none -		locus|R51_01622		C (cytoplasmic)	C:cytoplasm	Cytoplasmic	Unknown			0.553829	0
1589	CDS	R51_1	1667900	1666350	90.9091	-2	-	1551	Uncharacterized protein ylaB	- none -		locus|R51_01623		IM (inner membrane)	C:plasma membrane	InnerMembrane	CytoplasmicMembrane			0.588188	2
1590	CDS	R51_1	1668125	1668391	71.1014	2	+	267	LSU ribosomal protein L31p @ LSU ribosomal protein L31p, zinc-independent	Ribosome LSU bacterial; <br>Ribosome LSU bacterial		locus|R51_01624		C (cytoplasmic)	C:cytoplasm	Cytoplasmic	Cytoplasmic			0.398599	0
1591	CDS	R51_1	1669059	1668589	43.8516	-3	-	471	Putative inner membrane protein	- none -		locus|R51_01625		C (cytoplasmic)	C:plasma membrane	InnerMembrane	CytoplasmicMembrane			0.503974	2
1592	CDS	R51_1	1669728	1669177	90.3595	-3	-	552	Maltose O-acetyltransferase (EC 2.3.1.79)	Maltose and Maltodextrin Utilization		locus|R51_01626		C (cytoplasmic)	C:cytoplasm	Cytoplasmic	Cytoplasmic		Probable ANTIGEN	0.387	0
1593	CDS	R51_1	1670125	1669907	35.7454	-1	-	219	Haemolysin expression modulating protein	- none -		locus|R51_01627		C (cytoplasmic)	C:cytoplasm	Cytoplasmic	Unknown			0.458916	0
1594	CDS	R51_1	1670527	1670153	59.0337	-1	-	375	FIG00948312: hypothetical protein	- none -		locus|R51_01628		C (cytoplasmic)	C:cytoplasm	Cytoplasmic	Unknown			0.321714	0
1595	CDS	R51_1	1674172	1671023	92.0769	-1	-	3150	RND efflux system, inner membrane transporter CmeB	Multidrug Resistance Efflux Pumps		locus|R51_01629		IM (inner membrane)	C:plasma membrane	InnerMembrane	CytoplasmicMembrane			0.395329	11
1070	CDS	R51_1	1127291	1127833	93.2906	2	+	543	type 1 fimbriae major subunit FimA	Type 1 pili (mannose-sensitive fimbriae, gamma-fimbriae)		locus|R51_01097		EC (Extracellular)	C:extracellular space	Extracellular	Extracellular	SP	Probable ANTIGEN	0.429863	0
1597	CDS	R51_1	1675530	1676183	86.1461	3	+	654	Transcription repressor of multidrug efflux pump acrAB operon, TetR (AcrR) family	Multidrug Resistance Efflux Pumps		locus|R51_01631		C (cytoplasmic)	C:cytoplasm	Cytoplasmic	Cytoplasmic			0.434107	0
1598	CDS	R51_1	1676302	1679664	91.8251	1	+	3363	Potassium efflux system KefA protein / Small-conductance mechanosensitive channel	Potassium homeostasis		locus|R51_01632		IM (inner membrane)	C:plasma membrane	InnerMembrane	CytoplasmicMembrane	SP		0.340104	12
1599	CDS	R51_1	1680641	1679706	90.9091	-2	-	936	ISNCY family transposase ISRor2	- none -		locus|R51_01633		C (cytoplasmic)	C:cytoplasm	Cytoplasmic	Cytoplasmic			0.637256	0
1600	CDS	R51_1	1680878	1680711	69.842	-2	-	168	Putative inner membrane protein	- none -		locus|R51_01634		unknown	C:cytoplasm	Cytoplasmic	Unknown			0.304369	0
1601	CDS	R51_1	1681407	1680892	64.6439	-3	-	516	Primosomal replication protein N prime prime	- none -		locus|R51_01635		C (cytoplasmic)	C:cytoplasm	Cytoplasmic	Cytoplasmic			0.349458	0
1602	CDS	R51_1	1681488	1681865	7.32768	3	+	378	FIG039061: hypothetical protein related to heme utilization	- none -		locus|R51_01636		IM (inner membrane)	C:plasma membrane	InnerMembrane	CytoplasmicMembrane			0.805082	3
1603	CDS	R51_1	1682018	1682569	82.1388	2	+	552	Adenine phosphoribosyltransferase (EC 2.4.2.7)	Purine conversions; <br>cAMP signaling in bacteria		locus|R51_01637		C (cytoplasmic)	C:cytoplasm	Cytoplasmic	Cytoplasmic			0.555678	0
1604	CDS	R51_1	1682683	1684611	92.2372	1	+	1929	DNA polymerase III subunits gamma and tau (EC 2.7.7.7)	DNA processing cluster		locus|R51_01638		C (cytoplasmic)	C:cytoplasm	Cytoplasmic	Cytoplasmic			0.446629	0
1605	CDS	R51_1	1684657	1684986	81.2228	1	+	330	FIG000557: hypothetical protein co-occurring with RecR	DNA processing cluster		locus|R51_01639		C (cytoplasmic)	C:cytoplasm	Cytoplasmic	Unknown			0.340475	0
1606	CDS	R51_1	1684986	1685591	71.1243	3	+	606	Recombination protein RecR	DNA processing cluster; <br>DNA repair, bacterial RecFOR pathway		locus|R51_01640		C (cytoplasmic)	C:cytoplasm	Cytoplasmic	Cytoplasmic			0.304604	0
1607	CDS	R51_1	1685702	1687576	97.8475	2	+	1875	Chaperone protein HtpG	Protein chaperones		locus|R51_01641		C (cytoplasmic)	C:cytoplasm	Cytoplasmic	Cytoplasmic			0.434906	0
1608	CDS	R51_1	1687934	1688578	90.9091	2	+	645	Adenylate kinase (EC 2.7.4.3)	Purine conversions		locus|R51_01642		C (cytoplasmic)	C:cytoplasm	Cytoplasmic	Cytoplasmic			0.290084	0
1609	CDS	R51_1	1688807	1689769	90.9091	2	+	963	Ferrochelatase, protoheme ferro-lyase (EC 4.99.1.1)	Heme and Siroheme Biosynthesis		locus|R51_01643		C (cytoplasmic)	C:cytoplasm	Cytoplasmic	Cytoplasmic			0.285799	0
1610	CDS	R51_1	1690419	1689766	77.2842	-3	-	654	Acetyl esterase (EC 3.1.1.-)	- none -		locus|R51_01644		P (Periplasm)	C:cytoplasm	Cytoplasmic	Cytoplasmic			0.292901	0
1611	CDS	R51_1	1690737	1690486	44.676	-3	-	252	Acetyl esterase (EC 3.1.1.-)	- none -		locus|R51_01645		unknown	C:cytoplasm	Periplasmic	Cytoplasmic			0.40333	0
1612	CDS	R51_1	1690845	1692194	95.1454	3	+	1350	Inosine-guanosine kinase (EC 2.7.1.73)	Purine conversions		locus|R51_01646		C (cytoplasmic)	C:cytoplasm	Cytoplasmic	Cytoplasmic			0.60443	0
1613	CDS	R51_1	1693919	1692243	90.9091	-2	-	1677	POTASSIUM/PROTON ANTIPORTER ROSB	Potassium homeostasis		locus|R51_01647		IM (inner membrane)	C:plasma membrane	InnerMembrane	CytoplasmicMembrane			0.409567	12
1614	CDS	R51_1	1693997	1694122	47.401	2	+	126	hypothetical protein	- none -		locus|R51_01648		unknown	C:cytoplasm	Cytoplasmic	Unknown			0.359409	0
1615	CDS	R51_1	1695354	1694134	90.4053	-3	-	1221	Fosmidomycin resistance protein	- none -		locus|R51_01649		IM (inner membrane)	C:plasma membrane	InnerMembrane	CytoplasmicMembrane			0.404259	10
1616	CDS	R51_1	1695527	1697179	98.0994	2	+	1653	UDP-sugar hydrolase (EC 3.6.1.45); 5&#39;-nucleotidase (EC 3.1.3.5)	Purine conversions; <br>pyrimidine conversions		locus|R51_01650		OM (Outer Membrane)	C:extracellular space	Periplasmic	Periplasmic	SP		0.341772	0
1617	CDS	R51_1	1697775	1697296	85.7568	-3	-	480	Cys-tRNA(Pro) deacylase YbaK	tRNA aminoacylation, Pro		locus|R51_01651		C (cytoplasmic)	C:cytoplasm	Cytoplasmic	Cytoplasmic			0.394986	0
1618	CDS	R51_1	1698771	1697977	90.8862	-3	-	795	FIG00921183: possible ligase	- none -		locus|R51_01652		C (cytoplasmic)	C:cytoplasm	Cytoplasmic	Unknown			0.431875	0
1619	CDS	R51_1	1699684	1698857	95.4431	-1	-	828	Probable secreted protein	- none -		locus|R51_01653		OM (Outer Membrane)	C:extracellular space	Periplasmic	Unknown	SP		0.557648	0
1620	CDS	R51_1	1702339	1699838	90.9091	-1	-	2502	Lead, cadmium, zinc and mercury transporting ATPase (EC 3.6.3.3) (EC 3.6.3.5); Copper-translocating P-type ATPase (EC 3.6.3.4)	Copper Transport System; <br>Copper homeostasis		locus|R51_01654		IM (inner membrane)	C:plasma membrane	InnerMembrane	CytoplasmicMembrane			0.397274	8
1621	CDS	R51_1	1702449	1702865	88.5963	3	+	417	HTH-type transcriptional regulator cueR	- none -		locus|R51_01655		C (cytoplasmic)	C:cytoplasm	Cytoplasmic	Cytoplasmic			0.560095	0
1622	CDS	R51_1	1703318	1702866	23.8379	-2	-	453	Putative activity regulator of membrane protease YbbK	- none -		locus|R51_01656		IM (inner membrane)	C:plasma membrane	InnerMembrane	CytoplasmicMembrane			0.257172	3
1623	CDS	R51_1	1704232	1703315	90.9091	-1	-	918	Putative stomatin/prohibitin-family membrane protease subunit YbbK	- none -		locus|R51_01657		IM (inner membrane)	C:plasma membrane	InnerMembrane	Unknown			0.404908	1
1624	CDS	R51_1	1704380	1705057	74.5134	2	+	678	YbbL ABC transporter ATP-binding protein	Broadly distributed proteins not in subsystems		locus|R51_01658		C (cytoplasmic)	C:cytoplasm	Cytoplasmic	CytoplasmicMembrane			0.37555	0
1625	CDS	R51_1	1705044	1705823	81.177	3	+	780	YbbM seven transmembrane helix protein	Broadly distributed proteins not in subsystems		locus|R51_01659		IM (inner membrane)	C:plasma membrane	InnerMembrane	CytoplasmicMembrane			0.404413	6
1626	CDS	R51_1	1706256	1705909	70.8725	-3	-	348	FIG000875: Thioredoxin domain-containing protein EC-YbbN	- none -		locus|R51_01660		C (cytoplasmic)	C:cytoplasm	Cytoplasmic	Unknown			0.349061	0
1627	CDS	R51_1	1706763	1706341	73.689	-3	-	423	FIG000875: Thioredoxin domain-containing protein EC-YbbN	- none -		locus|R51_01661		C (cytoplasmic)	C:cytoplasm	Cytoplasmic	Cytoplasmic			0.392446	0
1628	CDS	R51_1	1707593	1706823	89.8557	-2	-	771	Putative NAD(P)-dependent oxidoreductase EC-YbbO	- none -		locus|R51_01662		C (cytoplasmic)	C:cytoplasm	Cytoplasmic	Cytoplasmic			0.31284	0
1629	CDS	R51_1	1708332	1707748	90.9091	-3	-	585	Arylesterase precursor (EC 3.1.1.2)	- none -		locus|R51_01663		P (Periplasm)	C:extracellular space	Periplasmic	Periplasmic	SP		0.300419	0
1630	CDS	R51_1	1708333	1709019	87.6803	1	+	687	Uncharacterized metabolite ABC transporter in Enterobacteriaceae, ATP-binding protein EC-YbbA	- none -		locus|R51_01664		C (cytoplasmic)	C:cytoplasm	Cytoplasmic	CytoplasmicMembrane			0.512328	0
1631	CDS	R51_1	1709016	1711430	90.9091	3	+	2415	FIG00809136: hypothetical protein	- none -		locus|R51_01665		IM (inner membrane)	C:plasma membrane	InnerMembrane	CytoplasmicMembrane	SP		0.351075	10
1632	CDS	R51_1	1711427	1711531	8.70163	2	+	105	hypothetical protein	- none -		locus|R51_01666		unknown		Cytoplasmic	Unknown			0.514627	0
1072	CDS	R51_1	1128625	1131246	97.275	1	+	2622	type 1 fimbriae anchoring protein FimD	Type 1 pili (mannose-sensitive fimbriae, gamma-fimbriae)		locus|R51_01099		OM (Outer Membrane)	C:extracellular space	OuterMembrane	OuterMembrane	SP	Probable ANTIGEN	0.377345	0
1634	CDS	R51_1	1713006	1713836	90.9091	3	+	831	Methionine ABC transporter substrate-binding protein	Methionine Biosynthesis; <br>Methionine Degradation		locus|R51_01668		P (Periplasm)	C:extracellular space	Periplasmic	CytoplasmicMembrane	SP		0.392574	0
1635	CDS	R51_1	1713873	1714889	88.4589	3	+	1017	Methionine ABC transporter ATP-binding protein	Methionine Biosynthesis; <br>Methionine Degradation		locus|R51_01669		unknown	C:cytoplasm	Cytoplasmic	CytoplasmicMembrane			0.590263	0
1636	CDS	R51_1	1714882	1715541	61.232	1	+	660	Methionine ABC transporter permease protein	Methionine Biosynthesis; <br>Methionine Degradation		locus|R51_01670		IM (inner membrane)	C:plasma membrane	InnerMembrane	CytoplasmicMembrane			0.448811	6
1637	CDS	R51_1	1716674	1715580	90.9091	-2	-	1095	Selenophosphate-dependent tRNA 2-selenouridine synthase	Selenocysteine metabolism; <br>tRNA modification Bacteria		locus|R51_01671		C (cytoplasmic)	C:cytoplasm	Cytoplasmic	Cytoplasmic			0.905052	0
1638	CDS	R51_1	1717670	1716744	90.2221	-2	-	927	DNA-binding transcriptional activator of the allD operon	Allantoin Utilization; <br>LysR-family proteins in Escherichia coli		locus|R51_01672		C (cytoplasmic)	C:cytoplasm	InnerMembrane	Cytoplasmic			0.538656	0
1639	CDS	R51_1	1717897	1718379	74.2386	1	+	483	Ureidoglycolate hydrolase (EC 3.5.3.19)	Allantoin Utilization		locus|R51_01673		C (cytoplasmic)	C:cytoplasm	Cytoplasmic	Unknown			0.695992	0
1640	CDS	R51_1	1718458	1719276	78.1314	1	+	819	Negative regulator of allantoin and glyoxylate utilization operons	Allantoin Utilization		locus|R51_01674		C (cytoplasmic)	C:cytoplasm	Cytoplasmic	Cytoplasmic			0.702974	0
1641	CDS	R51_1	1719361	1721142	93.7028	1	+	1782	Glyoxylate carboligase (EC 4.1.1.47)	Allantoin Utilization; <br>Glycerate metabolism		locus|R51_01675		C (cytoplasmic)	C:plasma membrane	Cytoplasmic	Cytoplasmic			0.847024	0
1642	CDS	R51_1	1721155	1721931	90.7717	1	+	777	Hydroxypyruvate isomerase (EC 5.3.1.22)	Glycerate metabolism		locus|R51_01676		C (cytoplasmic)	C:cytoplasm	Cytoplasmic	Cytoplasmic			0.812787	0
1643	CDS	R51_1	1722032	1722910	90.9091	2	+	879	2-hydroxy-3-oxopropionate reductase (EC 1.1.1.60)	Allantoin Utilization; <br>D-galactarate, D-glucarate and D-glycerate catabolism; <br>D-galactarate, D-glucarate and D-glycerate catabolism - gjo; <br>Glycerate metabolism		locus|R51_01677		unknown	C:extracellular space	Cytoplasmic	Cytoplasmic	SP		0.30507	0
1644	CDS	R51_1	1722976	1724223	90.9091	1	+	1248	Probable metabolite transport protein	- none -		locus|R51_01678		IM (inner membrane)	C:plasma membrane	InnerMembrane	CytoplasmicMembrane			0.309079	12
1645	CDS	R51_1	1724319	1725773	90.703	3	+	1455	Allantoin permease	Allantoin Utilization		locus|R51_01679		IM (inner membrane)	C:plasma membrane	InnerMembrane	CytoplasmicMembrane			0.470823	12
1646	CDS	R51_1	1725852	1727213	91.39	3	+	1362	Allantoinase (EC 3.5.2.5)	Allantoin Utilization		locus|R51_01680		C (cytoplasmic)	C:cytoplasm	Cytoplasmic	Cytoplasmic			0.266165	0
1647	CDS	R51_1	1727266	1728195	57.8429	1	+	930	Xanthine permease	Purine Utilization; <br>Xanthine Metabolism in Bacteria		locus|R51_01681		IM (inner membrane)	C:plasma membrane	InnerMembrane	CytoplasmicMembrane			0.430159	9
1648	CDS	R51_1	1728321	1728569	43.0044	3	+	249	Xanthine permease	Purine Utilization; <br>Xanthine Metabolism in Bacteria		locus|R51_01682		IM (inner membrane)	C:outer membrane	InnerMembrane	CytoplasmicMembrane			0.366313	2
1649	CDS	R51_1	1728592	1729740	90.9091	1	+	1149	Glycerate kinase (EC 2.7.1.31)	Allantoin Utilization; <br>D-galactarate, D-glucarate and D-glycerate catabolism; <br>D-galactarate, D-glucarate and D-glycerate catabolism - gjo; <br>Glycerate metabolism; <br>Glycerolipid and Glycerophospholipid Metabolism in Bacteria; <br>Glycine and Serine Utilization; <br>Serine-glyoxylate cycle		locus|R51_01683		C (cytoplasmic)	C:cytoplasm	Cytoplasmic	Cytoplasmic		Probable ANTIGEN	0.501166	0
1650	CDS	R51_1	1730605	1729820	90.8862	-1	-	786	Ureidoglycine aminohydrolase	- none -		locus|R51_01684		unknown	C:cytoplasm	Extracellular	Cytoplasmic			0.442074	0
1651	CDS	R51_1	1731851	1730616	90.9091	-2	-	1236	Allantoate amidohydrolase (EC 3.5.3.9)	Allantoin Utilization		locus|R51_01685		C (cytoplasmic)	C:cytoplasm	Cytoplasmic	Cytoplasmic			0.300271	0
1652	CDS	R51_1	1732583	1731873	90.9091	-2	-	711	Ureidoglycolate dehydrogenase (EC 1.1.1.154)	Allantoin Utilization		locus|R51_01686		C (cytoplasmic)	C:cytoplasm	Periplasmic	Cytoplasmic			0.644943	0
1653	CDS	R51_1	1732922	1732623	22.0518	-2	-	300	Ureidoglycolate dehydrogenase (EC 1.1.1.154)	Allantoin Utilization		locus|R51_01687		C (cytoplasmic)	C:outer membrane	Cytoplasmic	Unknown			0.623319	0
1654	CDS	R51_1	1733238	1734902	90.9091	3	+	1665	Protein fdrA	- none -		locus|R51_01688		C (cytoplasmic)	C:cytoplasm	Cytoplasmic	Unknown			0.286227	0
1655	CDS	R51_1	1734912	1736171	90.9091	3	+	1260	FIG074102: hypothetical protein	- none -		locus|R51_01689		C (cytoplasmic)	C:cytoplasm	InnerMembrane	Unknown			0.356893	0
1656	CDS	R51_1	1736183	1736992	78.8184	2	+	810	FIG074102: hypothetical protein	- none -		locus|R51_01690		C (cytoplasmic)	C:cytoplasm	Cytoplasmic	Unknown			0.354511	0
1657	CDS	R51_1	1736996	1737889	90.7946	2	+	894	Carbamate kinase (EC 2.7.2.2)	Arginine Deiminase Pathway; <br>Arginine and Ornithine Degradation; <br>Polyamine Metabolism		locus|R51_01691		unknown	C:cytoplasm	Cytoplasmic	Cytoplasmic			0.679904	0
1658	CDS	R51_1	1738997	1737930	89.6954	-2	-	1068	Phosphoribosylaminoimidazole carboxylase ATPase subunit (EC 4.1.1.21)	De Novo Purine Biosynthesis		locus|R51_01692		C (cytoplasmic)	C:cytoplasm	Cytoplasmic	CytoplasmicMembrane			0.485546	0
1659	CDS	R51_1	1739503	1738994	53.286	-1	-	510	Phosphoribosylaminoimidazole carboxylase catalytic subunit (EC 4.1.1.21)	De Novo Purine Biosynthesis		locus|R51_01693		C (cytoplasmic)	C:cytoplasm	Cytoplasmic	Unknown			0.273396	0
1660	CDS	R51_1	1740343	1739621	80.6732	-1	-	723	UDP-2,3-diacylglucosamine diphosphatase (EC 3.6.1.54)	KDO2-Lipid A biosynthesis; <br>Llipid A biosynthesis cluster		locus|R51_01694		C (cytoplasmic)	C:cytoplasm	Cytoplasmic	Cytoplasmic			0.340449	0
1661	CDS	R51_1	1740840	1740346	90.9091	-3	-	495	Peptidyl-prolyl cis-trans isomerase PpiB (EC 5.2.1.8)	Peptidyl-prolyl cis-trans isomerase; <br>Queuosine-Archaeosine Biosynthesis		locus|R51_01695		C (cytoplasmic)	C:cytoplasm	Cytoplasmic	Cytoplasmic			0.468132	0
1662	CDS	R51_1	1741013	1742398	93.5883	2	+	1386	Cysteinyl-tRNA synthetase (EC 6.1.1.16)	Zinc regulated enzymes; <br>tRNA aminoacylation, Cys		locus|R51_01696		C (cytoplasmic)	C:cytoplasm	Cytoplasmic	Cytoplasmic			0.759264	0
1663	CDS	R51_1	1743266	1742442	90.8862	-2	-	825	Putative outer membrane protein	- none -		locus|R51_01697		P (Periplasm)	C:extracellular space	OuterMembrane	Unknown	SP		0.539355	0
1664	CDS	R51_1	1743700	1743263	90.9091	-1	-	438	Putative inner membrane protein	- none -		locus|R51_01698		OM (Outer Membrane)	C:cytoplasm	Periplasmic	Unknown	SP		0.291336	0
1665	CDS	R51_1	1744238	1743693	51.3396	-2	-	546	Putative membrane-bound metal-dependent hydrolases	- none -		locus|R51_01699		IM (inner membrane)	C:plasma membrane	InnerMembrane	CytoplasmicMembrane			0.276264	4
1666	CDS	R51_1	1744577	1744365	60.6824	-2	-	213	FIG002958: hypothetical protein	DNA replication cluster 1; <br>Hypothetical Coupled to RecF		locus|R51_01700		C (cytoplasmic)	C:cytoplasm	Cytoplasmic	Unknown			0.485982	0
1667	CDS	R51_1	1745445	1744579	89.6496	-3	-	867	Methylenetetrahydrofolate dehydrogenase (NADP+) (EC 1.5.1.5) / Methenyltetrahydrofolate cyclohydrolase (EC 3.5.4.9)	5-FCL-like protein; <br>One-carbon metabolism by tetrahydropterines; <br>One-carbon metabolism by tetrahydropterines; <br>Serine-glyoxylate cycle; <br>Serine-glyoxylate cycle		locus|R51_01701		C (cytoplasmic)	C:cytoplasm	Cytoplasmic	Cytoplasmic			0.34779	0
1075	CDS	R51_1	1132814	1133332	91.8251	2	+	519	type 1 fimbrae adaptor subunit FimF	Type 1 pili (mannose-sensitive fimbriae, gamma-fimbriae)		locus|R51_01102		EC (Extracellular)	C:plasma membrane	Extracellular	Extracellular	SP	Probable ANTIGEN	0.490948	0
1132	CDS	R51_1	1196677	1197099	90.9091	1	+	423	Probable secreted protein	- none -		locus|R51_01159		P (Periplasm)	C:extracellular space	Periplasmic	Periplasmic	SP	Probable ANTIGEN	0.349493	0
1670	CDS	R51_1	1747199	1747891	91.2755	2	+	693	chaperone FimC	Type 1 pili (mannose-sensitive fimbriae, gamma-fimbriae)		locus|R51_01704		IM (inner membrane)	C:extracellular space	Periplasmic	Periplasmic	SP		0.793436	1	0.4867
1144	CDS	R51_1	1210722	1208362	98.0536	-3	-	2361	Outer membrane protein Imp, required for envelope biogenesis / Organic solvent tolerance protein precursor	EC49-61; <br>ECSIG4-SIG7; <br>Lipopolysaccharide assembly; <br>Possible RNA modification and stress response cluster; <br>Possible RNA modification and stress response cluster		locus|R51_01171		OM (Outer Membrane)	C:extracellular space	OuterMembrane	OuterMembrane	SP	Probable ANTIGEN	0.322153	0	0.5372
1161	CDS	R51_1	1231390	1231671	90.0847	1	+	282	FIG01047257: hypothetical protein	- none -		locus|R51_01188		P (Periplasm)	C:extracellular space	Periplasmic	Unknown	SP	Probable ANTIGEN	0.408372	0
1233	CDS	R51_1	1313094	1312411	90.9091	-3	-	684	Chaperone protein EcpD	- none -		locus|R51_01260		P (Periplasm)	C:plasma membrane	Periplasmic	Periplasmic	SP	Probable ANTIGEN	0.49451	0
1674	CDS	R51_1	1752762	1752130	89.3749	-3	-	633	Transcriptional regulator of fimbriae expression FimZ (LuxR/UhpA family)	The fimbrial Sfm cluster		locus|R51_01708		C (cytoplasmic)	C:cytoplasm	Cytoplasmic	Cytoplasmic			0.304446	0
1675	CDS	R51_1	1754088	1753366	81.9556	-3	-	723	Transcriptional regulator of fimbriae expression FimY	The fimbrial Sfm cluster		locus|R51_01709		C (cytoplasmic)	C:cytoplasm	Cytoplasmic	Unknown			0.384579	0
1676	CDS	R51_1	1754415	1754107	50.0115	-3	-	309	Putative diguanylate cyclase/phosphodiesterase domain 0	- none -		locus|R51_01710		C (cytoplasmic)	C:cytoplasm	Extracellular	Unknown			0.362327	0
1677	CDS	R51_1	1755176	1754580	75.6125	-2	-	597	Fimbriae W protein	- none -		locus|R51_01711		C (cytoplasmic)	C:cytoplasm	Cytoplasmic	Cytoplasmic			0.39164	0
1678	CDS	R51_1	1755873	1755601	10.3962	-3	-	273	Mobile element protein	- none -		locus|R51_01713		C (cytoplasmic)	C:cytoplasm	Cytoplasmic	Unknown			0.714227	0
1679	CDS	R51_1	1756268	1756050	12.9608	-2	-	219	Mobile element protein	- none -		locus|R51_01714		C (cytoplasmic)	C:cytoplasm	Cytoplasmic	Unknown		Probable ANTIGEN	0.340905	0
1680	CDS	R51_1	1756440	1756598	46.9659	3	+	159	hypothetical protein	- none -		locus|R51_01715		unknown	C:cytoplasm	Cytoplasmic	Unknown			0.625001	0
1681	CDS	R51_1	1758295	1756655	90.9091	-1	-	1641	Putative inner membrane protein	- none -		locus|R51_01716		IM (inner membrane)	C:plasma membrane	InnerMembrane	CytoplasmicMembrane			0.417207	9
1682	CDS	R51_1	1759214	1758288	90.7946	-2	-	927	Polymyxin resistance protein ArnC, glycosyl transferase (EC 2.4.-.-)	Lipid A-Ara4N pathway ( Polymyxin resistance )		locus|R51_01717		IM (inner membrane)	C:plasma membrane	Cytoplasmic	CytoplasmicMembrane			0.240897	2
1683	CDS	R51_1	1759573	1759211	37.646	-1	-	363	Bactoprenol-linked glucose translocase	- none -		locus|R51_01718		IM (inner membrane)	C:plasma membrane	InnerMembrane	CytoplasmicMembrane			0.273509	4
1684	CDS	R51_1	1760241	1759996	88.9856	-3	-	246	copE1	- none -		locus|R51_01719		C (cytoplasmic)	C:cytoplasm	Cytoplasmic	Periplasmic			0.569384	0
1685	CDS	R51_1	1760770	1760441	56.8583	-1	-	330	Heavy metal sensor histidine kinase	Cobalt-zinc-cadmium resistance		locus|R51_01720		C (cytoplasmic)	C:cytoplasm	Cytoplasmic	CytoplasmicMembrane			0.364163	0
1686	CDS	R51_1	1761963	1761109	77.1926	-3	-	855	Putative HTH-type transcriptional regulator ykgD	- none -		locus|R51_01721		C (cytoplasmic)	C:plasma membrane	Cytoplasmic	Cytoplasmic			0.348352	0
1687	CDS	R51_1	1762179	1763504	90.9091	3	+	1326	Putative Dihydrolipoamide dehydrogenase (EC 1.8.1.4); Mercuric ion reductase (EC 1.16.1.1); PF00070 family, FAD-dependent NAD(P)-disulphide oxidoreductase	Mercuric reductase; <br>Mercuric reductase; <br>Mercury resistance operon; <br>TCA Cycle		locus|R51_01722		C (cytoplasmic)	C:cytoplasm	Cytoplasmic	Cytoplasmic			0.457233	0
1688	CDS	R51_1	1763661	1763897	84.4516	3	+	237	hypothetical protein	- none -		locus|R51_01723		P (Periplasm)	C:extracellular space	Periplasmic	Unknown	SP		0.309611	0
1689	CDS	R51_1	1763910	1764470	77.1926	3	+	561	Putative inner membrane protein	- none -		locus|R51_01724		IM (inner membrane)	C:plasma membrane	InnerMembrane	CytoplasmicMembrane			0.329127	4
1690	CDS	R51_1	1765732	1764557	90.9091	-1	-	1176	Putative ATPase involved in DNA repair	- none -		locus|R51_01725		C (cytoplasmic)	C:cytoplasm	Cytoplasmic	Cytoplasmic			0.227071	0
1691	CDS	R51_1	1766058	1767452	90.0389	3	+	1395	Phenylalanine-specific permease	Aromatic amino acid degradation		locus|R51_01726		IM (inner membrane)	C:plasma membrane	InnerMembrane	CytoplasmicMembrane			0.312135	12
1692	CDS	R51_1	1768741	1767494	90.9091	-1	-	1248	Uncharacterized protein ybdG	- none -		locus|R51_01727		IM (inner membrane)	C:plasma membrane	InnerMembrane	CytoplasmicMembrane			0.453112	5
1248	CDS	R51_1	1328494	1330683	99.7481	1	+	2190	Ferric hydroxamate outer membrane receptor FhuA	Siderophore Aerobactin		locus|R51_01275		OM (Outer Membrane)	C:extracellular space	OuterMembrane	OuterMembrane	SP	Probable ANTIGEN	0.499765	0
1694	CDS	R51_1	1771942	1771289	79.6428	-1	-	654	Oxygen-insensitive NAD(P)H nitroreductase (EC 1.-.-.-) / Dihydropteridine reductase (EC 1.5.1.34)	- none -		locus|R51_01729		C (cytoplasmic)	C:cytoplasm	Periplasmic	Unknown			0.465135	0
1695	CDS	R51_1	1772407	1772039	38.0124	-1	-	369	FIG074102: hypothetical protein	- none -		locus|R51_01730		C (cytoplasmic)	C:cytoplasm	Cytoplasmic	Unknown			0.530253	0
1696	CDS	R51_1	1772988	1772407	76.6888	-3	-	582	Transcriptional regulator, TetR family	- none -		locus|R51_01731		C (cytoplasmic)	C:cytoplasm	Cytoplasmic	Unknown			0.325091	0
1697	CDS	R51_1	1773277	1773618	66.7964	1	+	342	Transcriptional activator RamA	Commensurate regulon activation		locus|R51_01732		C (cytoplasmic)	C:cytoplasm	Cytoplasmic	Cytoplasmic			0.394305	0
1698	CDS	R51_1	1773872	1773624	15.3423	-2	-	249	Putative inner membrane protein	- none -		locus|R51_01733		IM (inner membrane)	C:plasma membrane	InnerMembrane	CytoplasmicMembrane			0.36199	2
1699	CDS	R51_1	1775048	1773939	90.4053	-2	-	1110	FIG00638355: hypothetical protein	- none -		locus|R51_01734		C (cytoplasmic)	C:cytoplasm	Cytoplasmic	Cytoplasmic			0.271927	0
1700	CDS	R51_1	1775774	1775070	52.5074	-2	-	705	4&#39;-phosphopantetheinyl transferase (EC 2.7.8.-) [enterobactin] siderophore	Siderophore Enterobactin		locus|R51_01735		C (cytoplasmic)	C:cytoplasm	Cytoplasmic	Unknown			0.522355	0
1252	CDS	R51_1	1335412	1335972	96.4507	1	+	561	Major fimbrial subunit StfA	The fimbrial Stf cluster		locus|R51_01279		OM (Outer Membrane)	C:extracellular space	Extracellular	Extracellular	SP	Probable ANTIGEN	0.416154	0
1702	CDS	R51_1	1778264	1779478	90.9091	2	+	1215	Enterobactin esterase	Siderophore Enterobactin		locus|R51_01737		C (cytoplasmic)	C:cytoplasm	Cytoplasmic	Cytoplasmic			0.316182	0
1703	CDS	R51_1	1779509	1779727	65.9721	2	+	219	FIG005032: Putative cytoplasmic protein YbdZ in enterobactin biosynthesis operon	Siderophore Enterobactin		locus|R51_01738		C (cytoplasmic)	C:cytoplasm	Periplasmic	Unknown			0.386169	0
1704	CDS	R51_1	1779724	1783608	90.9091	1	+	3885	Enterobactin synthetase component F, serine activating enzyme (EC 2.7.7.-)	Siderophore Enterobactin		locus|R51_01739		C (cytoplasmic)	C:cytoplasm	Cytoplasmic	CytoplasmicMembrane			0.635585	0
1705	CDS	R51_1	1783858	1784994	90.9091	1	+	1137	Ferric enterobactin uptake protein FepE	Siderophore Enterobactin		locus|R51_01740		IM (inner membrane)	C:plasma membrane	InnerMembrane	CytoplasmicMembrane			0.523629	2
1706	CDS	R51_1	1785841	1785047	74.5134	-1	-	795	ABC-type Fe3+-siderophore transport system, ATPase component	- none -		locus|R51_01741		C (cytoplasmic)	C:cytoplasm	Cytoplasmic	CytoplasmicMembrane			0.387889	0
1707	CDS	R51_1	1786827	1785838	85.711	-3	-	990	Ferric enterobactin transport system permease protein FepG (TC 3.A.1.14.2)	Siderophore Enterobactin		locus|R51_01742		IM (inner membrane)	C:plasma membrane	InnerMembrane	CytoplasmicMembrane	SP		0.2623	8
1708	CDS	R51_1	1787834	1786827	77.8796	-2	-	1008	Ferric enterobactin transport system permease protein FepD (TC 3.A.1.14.2)	Siderophore Enterobactin		locus|R51_01743		IM (inner membrane)	C:plasma membrane	InnerMembrane	CytoplasmicMembrane			0.30033	9
1709	CDS	R51_1	1787945	1788151	30.2725	2	+	207	Enterobactin exporter EntS	Siderophore Enterobactin		locus|R51_01744		IM (inner membrane)	C:plasma membrane	InnerMembrane	CytoplasmicMembrane			0.249068	1
1710	CDS	R51_1	1788151	1789188	79.6657	1	+	1038	Enterobactin exporter EntS	Siderophore Enterobactin		locus|R51_01745		IM (inner membrane)	C:plasma membrane	InnerMembrane	CytoplasmicMembrane			0.437814	9
1711	CDS	R51_1	1790207	1789251	90.9091	-2	-	957	Ferric enterobactin-binding periplasmic protein FepB (TC 3.A.1.14.2)	Siderophore Enterobactin		locus|R51_01746		P (Periplasm)	C:plasma membrane	Periplasmic	Unknown	SP		0.427942	0
1712	CDS	R51_1	1790516	1791691	90.9091	2	+	1176	Isochorismate synthase (EC 5.4.4.2) of siderophore biosynthesis	Chorismate: Intermediate for synthesis of Tryptophan, PAPA antibiotics, PABA, 3-hydroxyanthranilate and more.		locus|R51_01747		C (cytoplasmic)	C:cytoplasm	Periplasmic	Cytoplasmic			0.327376	0
1713	CDS	R51_1	1791701	1793284	90.9091	2	+	1584	2,3-dihydroxybenzoate-AMP ligase (EC 2.7.7.58) [enterobactin] siderophore	Siderophore Enterobactin		locus|R51_01748		C (cytoplasmic)	C:cytoplasm	Cytoplasmic	Cytoplasmic			0.425509	0
1714	CDS	R51_1	1793325	1794182	87.6803	3	+	858	Isochorismatase (EC 3.3.2.1) of siderophore biosynthesis	Chorismate: Intermediate for synthesis of Tryptophan, PAPA antibiotics, PABA, 3-hydroxyanthranilate and more.; <br>NAD and NADP cofactor biosynthesis global		locus|R51_01749		C (cytoplasmic)	C:cytoplasm	Cytoplasmic	Unknown			0.501616	0
1715	CDS	R51_1	1794182	1794937	71.4678	2	+	756	2,3-dihydro-2,3-dihydroxybenzoate dehydrogenase (EC 1.3.1.28) of siderophore biosynthesis	- none -		locus|R51_01750		C (cytoplasmic)	C:cytoplasm	Periplasmic	Cytoplasmic			0.566572	0
1716	CDS	R51_1	1794940	1795353	39.7756	1	+	414	Proofreading thioesterase in enterobactin biosynthesis EntH	Siderophore Enterobactin		locus|R51_01751		C (cytoplasmic)	C:cytoplasm	Cytoplasmic	Unknown			0.84635	0
1717	CDS	R51_1	1795535	1797640	90.9091	2	+	2106	Carbon starvation protein A	Carbon Starvation; <br>Stress related cluster		locus|R51_01752		IM (inner membrane)	C:plasma membrane	InnerMembrane	CytoplasmicMembrane			0.734282	18
1718	CDS	R51_1	1797704	1797901	27.7536	2	+	198	COG2879, Hypothetical small protein yjiX	- none -		locus|R51_01753		C (cytoplasmic)	C:cytoplasm	Periplasmic	Unknown			0.776818	0
1719	CDS	R51_1	1799025	1797937	79.6657	-3	-	1089	Glycerol dehydrogenase (EC 1.1.1.6)	Respiratory dehydrogenases 1		locus|R51_01754		C (cytoplasmic)	C:cytoplasm	Cytoplasmic	Cytoplasmic			0.385537	0
1720	CDS	R51_1	1799152	1800312	90.9091	1	+	1161	Aspartate aminotransferase (EC 2.6.1.1)	CBSS-216591.1.peg.168; <br>Glutamine, Glutamate, Aspartate and Asparagine Biosynthesis; <br>Threonine and Homoserine Biosynthesis		locus|R51_01755		C (cytoplasmic)	C:cytoplasm	Cytoplasmic	Cytoplasmic			0.532476	0
1721	CDS	R51_1	1800930	1800313	83.8562	-3	-	618	Co-activator of prophage gene expression IbrB	IbrA and IbrB: co-activators of prophage gene expression		locus|R51_01756		C (cytoplasmic)	C:cytoplasm	Cytoplasmic	Cytoplasmic			0.324533	0
1722	CDS	R51_1	1801718	1800903	87.5658	-2	-	816	Co-activator of prophage gene expression IbrA	IbrA and IbrB: co-activators of prophage gene expression		locus|R51_01757		unknown	C:cytoplasm	Periplasmic	Unknown			0.381248	0
1723	CDS	R51_1	1802137	1801715	53.0799	-1	-	423	Co-activator of prophage gene expression IbrA	IbrA and IbrB: co-activators of prophage gene expression		locus|R51_01758		C (cytoplasmic)	C:cytoplasm	Cytoplasmic	Unknown			0.32047	0
1724	CDS	R51_1	1803205	1802303	90.7946	-1	-	903	LysR-family transcriptional regulator YbeF	LysR-family proteins in Salmonella enterica Typhimurium		locus|R51_01759		C (cytoplasmic)	C:cytoplasm	Cytoplasmic	Cytoplasmic			0.463139	0
1725	CDS	R51_1	1804268	1803522	90.9091	-2	-	747	Thiol:disulfide interchange protein DsbG precursor	Periplasmic disulfide interchange		locus|R51_01760		P (Periplasm)	C:extracellular space	Periplasmic	Periplasmic	SP		0.691366	0
1726	CDS	R51_1	1804709	1805272	90.6114	2	+	564	Alkyl hydroperoxide reductase protein C (EC 1.6.4.-)	Thioredoxin-disulfide reductase		locus|R51_01761		C (cytoplasmic)	C:cytoplasm	Cytoplasmic	Cytoplasmic			0.693561	0
1727	CDS	R51_1	1805514	1807079	91.1152	3	+	1566	Alkyl hydroperoxide reductase protein F (EC 1.6.4.-)	Thioredoxin-disulfide reductase		locus|R51_01762		C (cytoplasmic)	C:cytoplasm	Cytoplasmic	CytoplasmicMembrane			0.443714	0
1728	CDS	R51_1	1807412	1807972	60.3847	2	+	561	Putative oxidoreductase component of anaerobic dehydrogenases; Chaperone protein TorD	trimethylamine N-oxide (TMAO) reductase		locus|R51_01763		C (cytoplasmic)	C:plasma membrane	Cytoplasmic	CytoplasmicMembrane			0.410604	0
1729	CDS	R51_1	1807965	1810244	93.8402	3	+	2280	Anaerobic dimethyl sulfoxide reductase chain A (EC 1.8.5.3)	- none -		locus|R51_01764		P (Periplasm)	C:extracellular space	Periplasmic	Unknown	SP		0.333023	1
1730	CDS	R51_1	1810241	1810798	75.0401	2	+	558	Anaerobic dimethyl sulfoxide reductase chain B (EC 1.8.5.3)	- none -		locus|R51_01765		C (cytoplasmic)	C:cytoplasm	Periplasmic	CytoplasmicMembrane			0.274033	0
1731	CDS	R51_1	1810798	1811565	37.646	1	+	768	Anaerobic dimethyl sulfoxide reductase chain C (EC 1.8.5.3)	- none -		locus|R51_01766		IM (inner membrane)	C:plasma membrane	InnerMembrane	CytoplasmicMembrane			0.365848	8
1732	CDS	R51_1	1812061	1811633	66.2698	-1	-	429	Universal stress protein G	Universal stress protein family		locus|R51_01767		C (cytoplasmic)	C:cytoplasm	Cytoplasmic	Cytoplasmic			0.317905	0
1733	CDS	R51_1	1812284	1813522	93.8631	2	+	1239	Uncharacterized zinc-type alcohol dehydrogenase-like protein ybdR	- none -		locus|R51_01768		C (cytoplasmic)	C:cytoplasm	Cytoplasmic	Cytoplasmic			0.436359	0
1734	CDS	R51_1	1814015	1813605	75.6354	-2	-	411	Regulator of nucleoside diphosphate kinase	Transcription factors bacterial		locus|R51_01769		unknown	C:cytoplasm	Cytoplasmic	Cytoplasmic			0.356149	0
1735	CDS	R51_1	1815056	1814250	90.9091	-2	-	807	Ribonuclease I precursor (EC 3.1.27.6)	RNA processing and degradation, bacterial		locus|R51_01770		P (Periplasm)	C:extracellular space	Periplasmic	Periplasmic	SP		0.750409	0
1736	CDS	R51_1	1816629	1815166	90.9091	-3	-	1464	Citrate Succinate antiporter (TC 2.A.47.3.2)	Citrate Metabolism, Transport, and Regulation		locus|R51_01771		IM (inner membrane)	C:plasma membrane	InnerMembrane	CytoplasmicMembrane			0.29549	13
1737	CDS	R51_1	1817476	1816667	81.5892	-1	-	810	2-(5&#39;&#39;-triphosphoribosyl)-3&#39;-dephosphocoenzyme-A synthase (EC 2.7.8.25)	Citrate Metabolism, Transport, and Regulation		locus|R51_01772		unknown	C:cytoplasm	Cytoplasmic	Unknown			0.428368	0
1738	CDS	R51_1	1818086	1817535	66.4758	-2	-	552	Apo-citrate lyase phosphoribosyl-dephospho-CoA transferase (EC 2.7.7.61)	Citrate Metabolism, Transport, and Regulation		locus|R51_01773		C (cytoplasmic)	C:cytoplasm	Cytoplasmic	Unknown			0.60788	0
1739	CDS	R51_1	1819619	1818090	90.9091	-2	-	1530	Citrate lyase alpha chain (EC 4.1.3.6)	Citrate Metabolism, Transport, and Regulation		locus|R51_01774		unknown	C:cytoplasm	Cytoplasmic	Cytoplasmic			0.49646	0
1740	CDS	R51_1	1820537	1819629	86.0774	-2	-	909	Citrate lyase beta chain (EC 4.1.3.6)	Citrate Metabolism, Transport, and Regulation		locus|R51_01775		C (cytoplasmic)	C:cytoplasm	Cytoplasmic	Cytoplasmic	SP		0.283121	0
1741	CDS	R51_1	1820830	1820534	83.3753	-1	-	297	Citrate lyase gamma chain, acyl carrier protein (EC 4.1.3.6)	Citrate Metabolism, Transport, and Regulation; <br>TCA Cycle		locus|R51_01776		unknown	C:cytoplasm	Cytoplasmic	Cytoplasmic			0.365416	0
1742	CDS	R51_1	1821903	1820827	90.8862	-3	-	1077	[Citrate [pro-3S]-lyase] ligase (EC 6.2.1.22)	Citrate Metabolism, Transport, and Regulation		locus|R51_01777		C (cytoplasmic)	C:cytoplasm	Cytoplasmic	Cytoplasmic			0.596583	0
1743	CDS	R51_1	1822288	1823949	90.9091	1	+	1662	Sensor kinase CitA, DpiB (EC 2.7.3.-)	CitAB; <br>Citrate Metabolism, Transport, and Regulation; <br>Orphan regulatory proteins		locus|R51_01778		IM (inner membrane)	C:plasma membrane	InnerMembrane	CytoplasmicMembrane			0.337876	2
1744	CDS	R51_1	1823918	1824598	87.8177	2	+	681	Transcriptional regulatory protein CitB, DpiA	CitAB; <br>Citrate Metabolism, Transport, and Regulation; <br>Orphan regulatory proteins		locus|R51_01779		C (cytoplasmic)	C:cytoplasm	Cytoplasmic	Cytoplasmic			0.407184	0
1745	CDS	R51_1	1825494	1824652	74.2157	-3	-	843	C4-dicarboxylate transporter DcuC (TC 2.A.61.1.1)	Citrate Metabolism, Transport, and Regulation		locus|R51_01780		IM (inner membrane)	C:plasma membrane	InnerMembrane	CytoplasmicMembrane			0.503515	7
1746	CDS	R51_1	1825927	1825454	65.1019	-1	-	474	C4-dicarboxylate transporter DcuC (TC 2.A.61.1.1)	Citrate Metabolism, Transport, and Regulation		locus|R51_01781		IM (inner membrane)	C:plasma membrane	InnerMembrane	CytoplasmicMembrane			0.26502	3
1747	CDS	R51_1	1826306	1826878	90.9091	2	+	573	Lipid A acylation protein PagP, palmitoyltransferase	Lipid A modifications		locus|R51_01782		IM (inner membrane)	C:outer membrane	InnerMembrane	OuterMembrane	SP		0.283322	1
1748	CDS	R51_1	1827066	1827275	75.2691	3	+	210	Cold shock protein CspE	Cold shock, CspA family of proteins		locus|R51_01783		C (cytoplasmic)	C:cytoplasm	Cytoplasmic	Cytoplasmic		Probable ANTIGEN	0.358286	0
1749	CDS	R51_1	1827716	1827333	64.4378	-2	-	384	CrcB protein	- none -		locus|R51_01784		unknown	C:plasma membrane	InnerMembrane	CytoplasmicMembrane			0.331615	4
1750	CDS	R51_1	1827807	1828595	69.4756	3	+	789	Aliphatic amidase AmiE (EC 3.5.1.4)	- none -		locus|R51_01785		C (cytoplasmic)	C:cytoplasm	Cytoplasmic	Cytoplasmic			0.277932	0
1751	CDS	R51_1	1828724	1828927	64.5065	2	+	204	Twin-arginine translocation protein TatE	Twin-arginine translocation system		locus|R51_01786		IM (inner membrane)	C:plasma membrane	Cytoplasmic	CytoplasmicMembrane			0.452999	1
1752	CDS	R51_1	1829978	1829013	90.9091	-2	-	966	Lipoate synthase	Lipoic acid metabolism; <br>Lipoic acid synthesis cluster		locus|R51_01787		C (cytoplasmic)	C:cytoplasm	Cytoplasmic	Cytoplasmic			0.423331	0
1753	CDS	R51_1	1831137	1830184	90.6572	-3	-	954	LysR-family transcriptional regulator YbeF	LysR-family proteins in Salmonella enterica Typhimurium		locus|R51_01788		C (cytoplasmic)	C:cytoplasm	Cytoplasmic	Cytoplasmic			0.591862	0
1754	CDS	R51_1	1832080	1831439	85.5736	-1	-	642	Octanoate-[acyl-carrier-protein]-protein-N-octanoyltransferase	Lipoic acid metabolism; <br>Lipoic acid synthesis cluster		locus|R51_01789		C (cytoplasmic)	C:cytoplasm	Cytoplasmic	Cytoplasmic		Probable ANTIGEN	0.493796	0
1755	CDS	R51_1	1832443	1832180	77.1468	-1	-	264	Proposed lipoate regulatory protein YbeD	Lipoic acid metabolism; <br>Lipoic acid synthesis cluster		locus|R51_01790		C (cytoplasmic)	C:cytoplasm	Cytoplasmic	Unknown			0.231717	0
1756	CDS	R51_1	1833762	1832551	94.9851	-3	-	1212	D-alanyl-D-alanine carboxypeptidase (EC 3.4.16.4)	Metallocarboxypeptidases (EC 3.4.17.-); <br>Murein Hydrolases; <br>Peptidoglycan Biosynthesis		locus|R51_01791		EC (Extracellular)	C:extracellular space	Periplasmic	CytoplasmicMembrane	SP		0.242861	0
1253	CDS	R51_1	1336058	1337419	94.8935	2	+	1362	Fimbriae usher protein StfC	The fimbrial Stf cluster		locus|R51_01280		OM (Outer Membrane)	C:extracellular space	OuterMembrane	OuterMembrane	SP	Probable ANTIGEN	0.337107	0
1758	CDS	R51_1	1836158	1835046	60.0183	-2	-	1113	Rod shape-determining protein RodA	Bacterial Cytoskeleton; <br>Bacterial cell division cluster; <br>Peptidoglycan Biosynthesis		locus|R51_01793		IM (inner membrane)	C:plasma membrane	InnerMembrane	CytoplasmicMembrane			0.259109	9
1759	CDS	R51_1	1838062	1836161	95.9698	-1	-	1902	Penicillin-binding protein 2 (PBP-2)	16S rRNA modification within P site of ribosome; <br>Bacterial cell division cluster; <br>CBSS-83331.1.peg.3039; <br>Peptidoglycan Biosynthesis		locus|R51_01794		P (Periplasm)	C:plasma membrane	Periplasmic	CytoplasmicMembrane			0.415338	1
1760	CDS	R51_1	1838560	1838093	85.6194	-1	-	468	LSU m3Psi1915 methyltransferase RlmH	RNA methylation; <br>Ribosome biogenesis bacterial; <br>tRNA modification Bacteria		locus|R51_01795		C (cytoplasmic)	C:cytoplasm	Cytoplasmic	Unknown			0.409707	0
1761	CDS	R51_1	1838881	1838564	83.5127	-1	-	318	Iojap protein	- none -		locus|R51_01796		C (cytoplasmic)	C:cytoplasm	Cytoplasmic	Cytoplasmic			0.294268	0
[truncated: 3,049 more rows]

## Sheet: Supp. Table4_182-pan-genome
Gene	conservation	Non-unique Gene name	Annotation	No. isolates	No. sequences	Avg sequences per isolate	Min group size nuc	Max group size nuc	Avg group size nuc	CL100115972_L01_592.fq	CL100115972_L01_593.fq	CL100115972_L01_594.fq	CL100115972_L01_595.fq	CL200117693_L01_524.fq	CL200117693_L01_525.fq	CL200117693_L01_526.fq	CL200117693_L01_527.fq	CL200117693_L01_528.fq	CL200117693_L01_529.fq	CL200117693_L01_530.fq	CL200117693_L01_531.fq	CL200117693_L01_532.fq	CL200117693_L01_541.fq	CL200117693_L01_542.fq	CL200117693_L01_543.fq	CL200117693_L01_544.fq	CL200117693_L01_545.fq	CL200117693_L01_546.fq	SAL00744	SAL02647_FDMS202320481-1a.clean.fq.fasta	SAL02648_FDMS202320482-1a.clean.fq.fasta	SAL02649_FDMS202320483-1a.clean.fq.fasta	SAL02650_FDMS202320484-1a.clean.fq.fasta	SAL02651_FDMS202320485-1a.clean.fq.fasta	SAL02652_FDMS202320486-1a.clean.fq.fasta	SAL02653_FDMS202320487-1a.clean.fq.fasta	SAL02654_FDMS202320488-1a.clean.fq.fasta	SAL02655_FDMS202320489-1a.clean.fq.fasta	SAL02656_FDMS202320490-1a.clean.fq.fasta	SAL02657_FDMS202320491-1a.clean.fq.fasta	SAL02658_FDMS202320492-1a.clean.fq.fasta	SAL02659_FDMS202320493-1a.clean.fq.fasta	SAL02660_FDMS202320494-1a.clean.fq.fasta	SAL02661_FDMS202320495-1a.clean.fq.fasta	SAL02662_FDMS202320496-1a.clean.fq.fasta	SAL02663_FDMS202320497-1a.clean.fq.fasta	SAL02664_FDMS202320498-1a.clean.fq.fasta	SAL02665_FDMS202320499-1a.clean.fq.fasta	SAL02666_FDMS202320500-1a.clean.fq.fasta
[truncated: 4,561 more rows]
[truncated: 142 more columns]

[truncated: 1 more sheets: Supp.Table5_Candidates sequence]
